# Supplementary material
Source: publisher figshare collection journal article supplement (https://gsapubs.figshare.com/ndownloader/files/25883736)
Supplement: Supplementary file 1 [file 25883736]

## Sheet: Leaf Data
	Dataset S4. Raw fossil leaf data
	Class	Class Code	Order	Order Code	Family	Family Code	Genus/Species	Genus Code	Species Code	Clade	Clade Code	Stage	Stage Val	Study	Study Val	Abundance	Formation	Formation Val	Paleolat (76 Ma)	Paleolon (76 Ma)	Paleolat (73.5 Ma)	Paleolon (73.5 Ma)	Paleolat (70.5 Ma)	Paleolon (70.5 Ma)	Lat	Lon	Quantitative Age	Error	Rd Age	Environment	Environment Code	EV	Notes
	Marchantiopsida	8	Hepaticae?	29	uncertain	101	Hepaticites quadrangularis	107	238	Fern/Moss	2	Camp	1	Crabtree, 1987	2	NULL	Two Medicine	13	57.5485	-78.8712	57.6435	-81.127	56.7089	-83.9675	48.5272	-112.295	78.2	3.4	80	wet, successional	5	5. wet, successional	Coordinates are an average of sites shown in Fig. 4
	Marchantiopsida	8	Marchantiales	38	Marchantiaceae	58	Marchantities palmeri	137	311	Fern/Moss	2	Camp	1	Crabtree, 1987	2	NULL	Two Medicine	13	57.5485	-78.8712	57.6435	-81.127	56.7089	-83.9675	48.5272	-112.295	78.2	3.4	80	tropical lowland forest	6	6. tropical lowland forest	Coordinates are an average of sites shown in Fig. 4
	Polypodiopsida	10	Equisetales	19	Equisetaceae	34	Equisetum sp.	87	170	Fern/Moss	2	Camp	1	Crabtree, 1987	2	NULL	Two Medicine	13	57.5485	-78.8712	57.6435	-81.127	56.7089	-83.9675	48.5272	-112.295	78.2	3.4	80	wet, successional	5	5. wet, successional	Coordinates are an average of sites shown in Fig. 4
	Polypodiopsida	10	Polypodiales	46	Blechnaceae	15	Woodwardia minor	249	573	Fern/Moss	2	Camp	1	Crabtree, 1987	2	NULL	Two Medicine	13	57.5485	-78.8712	57.6435	-81.127	56.7089	-83.9675	48.5272	-112.295	78.2	3.4	80	temperate lowland forest	2	2. temperate lowland forest	Coordinates are an average of sites shown in Fig. 4
	Polypodiopsida	10	Osmundales	41	Osmundaceae	67	Osmunda sp. cf. O. affinis	158	352	Fern/Moss	2	Camp	1	Crabtree, 1987	2	NULL	Two Medicine	13	57.5485	-78.8712	57.6435	-81.127	56.7089	-83.9675	48.5272	-112.295	78.2	3.4	80	temperate lowland forest	2	2. temperate lowland forest	Coordinates are an average of sites shown in Fig. 4
	Polypodiopsida	10	Polypodiales	46	Dennstaedtiaceae	30	Dennstaedtia tenella	73	130	Fern/Moss	2	Camp	1	Crabtree, 1987	2	NULL	Two Medicine	13	57.5485	-78.8712	57.6435	-81.127	56.7089	-83.9675	48.5272	-112.295	78.2	3.4	80	tropical lowland forest	6	6. tropical lowland forest	Coordinates are an average of sites shown in Fig. 4
	Polypodiopsida	10	Polypodiales	46	Thelypteridaceae	90	Thelypteris goldianum	233	537	Fern/Moss	2	Camp	1	Crabtree, 1987	2	NULL	Two Medicine	13	57.5485	-78.8712	57.6435	-81.127	56.7089	-83.9675	48.5272	-112.295	78.2	3.4	80	tropical lowland forest	6	6. tropical lowland forest	Coordinates are an average of sites shown in Fig. 4
	Polypodiopsida	10	Gleicheniales?	28	Gleicheniaceae?	44	Eodicranopteris campanianum	86	169	Fern/Moss	2	Camp	1	Crabtree, 1987	2	NULL	Two Medicine	13	57.5485	-78.8712	57.6435	-81.127	56.7089	-83.9675	48.5272	-112.295	78.2	3.4	80	tropical lowland forest	6	6. tropical lowland forest	Coordinates are an average of sites shown in Fig. 4
	Polypodiopsida	10	Osmundales	41	Osmundaceae	67	Filicites sp.	94	212	Fern/Moss	2	Camp	1	Crabtree, 1987	2	NULL	Two Medicine	13	57.5485	-78.8712	57.6435	-81.127	56.7089	-83.9675	48.5272	-112.295	78.2	3.4	80	unknown	0	0. unknown	Coordinates are an average of sites shown in Fig. 4
	Polypodiopsida	10	Osmundales	41	Osmundaceae	67	Filicites supercretacea	94	213	Fern/Moss	2	Camp	1	Crabtree, 1987	2	NULL	Two Medicine	13	57.5485	-78.8712	57.6435	-81.127	56.7089	-83.9675	48.5272	-112.295	78.2	3.4	80	unknown	0	0. unknown	Coordinates are an average of sites shown in Fig. 4
	Pinopsida	9	Pinales	42	Podocarpaceae	74	Elatocladus albertaensis	85	168	Gymnosperm	3	Camp	1	Crabtree, 1987	2	NULL	Two Medicine	13	57.5485	-78.8712	57.6435	-81.127	56.7089	-83.9675	48.5272	-112.295	78.2	3.4	80	temperate lowland forest	2	2. temperate lowland forest	Coordinates are an average of sites shown in Fig. 4
	Pinopsida	9	Pinales	42	Cupressaceae	24	Cyparissidium douglassi	67	122	Gymnosperm	3	Camp	1	Crabtree, 1987	2	NULL	Two Medicine	13	57.5485	-78.8712	57.6435	-81.127	56.7089	-83.9675	48.5272	-112.295	78.2	3.4	80	temperate lowland forest	2	2. temperate lowland forest	Coordinates are an average of sites shown in Fig. 4
	Cycadopsida	2	uncertain	63	Cycadeoideaceae	26	Conites sp.	57	99	Gymnosperm	3	Camp	1	Crabtree, 1987	2	NULL	Two Medicine	13	57.5485	-78.8712	57.6435	-81.127	56.7089	-83.9675	48.5272	-112.295	78.2	3.4	80	unknown	0	0. unknown	Coordinates are an average of sites shown in Fig. 4
	Magnoliopsida?	7	Magnoliales?	35	uncertain	101	Quereuxia angulata	198	460	Angiosperm	1	Camp	1	Crabtree, 1987	2	NULL	Two Medicine	13	57.5485	-78.8712	57.6435	-81.127	56.7089	-83.9675	48.5272	-112.295	78.2	3.4	80	estuarine, aquatic	7	7. estuarine, aquatic	Coordinates are an average of sites shown in Fig. 4
	uncertain	11	uncertain	63	uncertain	101	Plicatophyllum imperialis	185	422	Angiosperm	1	Camp	1	Crabtree, 1987	2	NULL	Two Medicine	13	57.5485	-78.8712	57.6435	-81.127	56.7089	-83.9675	48.5272	-112.295	78.2	3.4	80	temperate lowland forest	2	2. temperate lowland forest	Coordinates are an average of sites shown in Fig. 4
	uncertain	11	uncertain	63	uncertain	101	Diacrophyllum visibilis	74	131	Angiosperm	1	Camp	1	Crabtree, 1987	2	NULL	Two Medicine	13	57.5485	-78.8712	57.6435	-81.127	56.7089	-83.9675	48.5272	-112.295	78.2	3.4	80	wet, successional	5	5. wet, successional	Coordinates are an average of sites shown in Fig. 4
	Magnoliopsida?	7	Rosales	51	Moraceae	61	Ficus planicostata	92	190	Angiosperm	1	Camp	1	Crabtree, 1987	2	NULL	Two Medicine	13	57.5485	-78.8712	57.6435	-81.127	56.7089	-83.9675	48.5272	-112.295	78.2	3.4	80	tropical lowland forest	6	6. tropical lowland forest	Coordinates are an average of sites shown in Fig. 4
	Magnoliopsida?	7	uncertain	63	uncertain	101	Dicot 27, Magnoliatae	130	138	Angiosperm	1	Camp	1	Crabtree, 1987	2	NULL	Two Medicine	13	57.5485	-78.8712	57.6435	-81.127	56.7089	-83.9675	48.5272	-112.295	78.2	3.4	80	unknown	0	0. unknown	Coordinates are an average of sites shown in Fig. 4
	uncertain	11	uncertain	63	uncertain	101	Dicot 28, Diacrophyllum	74	139	Angiosperm	1	Camp	1	Crabtree, 1987	2	NULL	Two Medicine	13	57.5485	-78.8712	57.6435	-81.127	56.7089	-83.9675	48.5272	-112.295	78.2	3.4	80	wet, successional	5	5. wet, successional	Coordinates are an average of sites shown in Fig. 4
	uncertain	11	uncertain	63	uncertain	101	Dicot 5, Diacrophyllum	74	146	Angiosperm	1	Camp	1	Crabtree, 1987	2	NULL	Two Medicine	13	57.5485	-78.8712	57.6435	-81.127	56.7089	-83.9675	48.5272	-112.295	78.2	3.4	80	wet, successional	5	5. wet, successional	Coordinates are an average of sites shown in Fig. 4
	uncertain	11	uncertain	63	uncertain	101	Dicot 40, Diacrophyllum	74	144	Angiosperm	1	Camp	1	Crabtree, 1987	2	NULL	Two Medicine	13	57.5485	-78.8712	57.6435	-81.127	56.7089	-83.9675	48.5272	-112.295	78.2	3.4	80	wet, successional	5	5. wet, successional	Coordinates are an average of sites shown in Fig. 4
	uncertain	11	uncertain	63	uncertain	101	Dicot 29, Diacrophyllum	74	140	Angiosperm	1	Camp	1	Crabtree, 1987	2	NULL	Two Medicine	13	57.5485	-78.8712	57.6435	-81.127	56.7089	-83.9675	48.5272	-112.295	78.2	3.4	80	wet, successional	5	5. wet, successional	Coordinates are an average of sites shown in Fig. 4
	Magnoliopsida	6	Piperales	44	uncertain	101	Dicot 16, Piperales	178	136	Angiosperm	1	Camp	1	Crabtree, 1987	2	NULL	Two Medicine	13	57.5485	-78.8712	57.6435	-81.127	56.7089	-83.9675	48.5272	-112.295	78.2	3.4	80	tropical lowland forest	6	6. tropical lowland forest	Coordinates are an average of sites shown in Fig. 4
	Magnoliopsida	6	Laurales	31	uncertain	101	Dicot 12, Laurales	112	134	Angiosperm	1	Camp	1	Crabtree, 1987	2	NULL	Two Medicine	13	57.5485	-78.8712	57.6435	-81.127	56.7089	-83.9675	48.5272	-112.295	78.2	3.4	80	tropical lowland forest	6	6. tropical lowland forest	Coordinates are an average of sites shown in Fig. 4
	Magnoliopsida	6	Laurales	31	uncertain	101	Dicot 15, Laurales	112	135	Angiosperm	1	Camp	1	Crabtree, 1987	2	NULL	Two Medicine	13	57.5485	-78.8712	57.6435	-81.127	56.7089	-83.9675	48.5272	-112.295	78.2	3.4	80	tropical lowland forest	6	6. tropical lowland forest	Coordinates are an average of sites shown in Fig. 4
	Magnoliopsida	6	Austrobaileyales	4	Trimeniaceae	91	Dicot 3, Trimeniaceae	236	141	Angiosperm	1	Camp	1	Crabtree, 1987	2	NULL	Two Medicine	13	57.5485	-78.8712	57.6435	-81.127	56.7089	-83.9675	48.5272	-112.295	78.2	3.4	80	tropical lowland forest	6	6. tropical lowland forest	Coordinates are an average of sites shown in Fig. 4
	Magnoliopsida	6	Ranunculales	48	Menispermaceae	60	Menispermites sp.	141	320	Angiosperm	1	Camp	1	Crabtree, 1987	2	NULL	Two Medicine	13	57.5485	-78.8712	57.6435	-81.127	56.7089	-83.9675	48.5272	-112.295	78.2	3.4	80	tropical lowland forest	6	6. tropical lowland forest	Coordinates are an average of sites shown in Fig. 4
	Magnoliopsida	6	Ranunculales	48	Menispermaceae	60	Minispermites medici	145	326	Angiosperm	1	Camp	1	Crabtree, 1987	2	NULL	Two Medicine	13	57.5485	-78.8712	57.6435	-81.127	56.7089	-83.9675	48.5272	-112.295	78.2	3.4	80	unknown	0	0. unknown	Coordinates are an average of sites shown in Fig. 4
	Magnoliopsida	6	Proteales	47	uncertain	101	Dicot 50, Hamamelididae	105	147	Angiosperm	1	Camp	1	Crabtree, 1987	2	NULL	Two Medicine	13	57.5485	-78.8712	57.6435	-81.127	56.7089	-83.9675	48.5272	-112.295	78.2	3.4	80	coastal plain	4	4. coastal plain	Coordinates are an average of sites shown in Fig. 4
	Magnoliopsida	6	Proteales	47	uncertain	101	Dicot 53, Hamamelididae	105	148	Angiosperm	1	Camp	1	Crabtree, 1987	2	NULL	Two Medicine	13	57.5485	-78.8712	57.6435	-81.127	56.7089	-83.9675	48.5272	-112.295	78.2	3.4	80	coastal plain	4	4. coastal plain	Coordinates are an average of sites shown in Fig. 4
	Magnoliopsida	6	Trochodendrales/Cercidiphyllales	59	uncertain	101	Dicot 11, Trochodendrales	237	133	Angiosperm	1	Camp	1	Crabtree, 1987	2	NULL	Two Medicine	13	57.5485	-78.8712	57.6435	-81.127	56.7089	-83.9675	48.5272	-112.295	78.2	3.4	80	tropical lowland forest	6	6. tropical lowland forest	Coordinates are an average of sites shown in Fig. 4
	Magnoliopsida	6	Fagales	22	Fagaceae	39	Dryophyllum campanianum	81	157	Angiosperm	1	Camp	1	Crabtree, 1987	2	NULL	Two Medicine	13	57.5485	-78.8712	57.6435	-81.127	56.7089	-83.9675	48.5272	-112.295	78.2	3.4	80	temperate lowland forest	2	2. temperate lowland forest	Coordinates are an average of sites shown in Fig. 4
	Magnoliopsida	6	Proteales	47	Platanaceae	72	Dicot 6, Platanaceae	181	149	Angiosperm	1	Camp	1	Crabtree, 1987	2	NULL	Two Medicine	13	57.5485	-78.8712	57.6435	-81.127	56.7089	-83.9675	48.5272	-112.295	78.2	3.4	80	temperate lowland forest	2	2. temperate lowland forest	Coordinates are an average of sites shown in Fig. 4
	Magnoliopsida	6	Proteales	47	Platanaceae	72	Dicot 19, Platanaceae	181	137	Angiosperm	1	Camp	1	Crabtree, 1987	2	NULL	Two Medicine	13	57.5485	-78.8712	57.6435	-81.127	56.7089	-83.9675	48.5272	-112.295	78.2	3.4	80	temperate lowland forest	2	2. temperate lowland forest	Coordinates are an average of sites shown in Fig. 4
	Magnoliopsida	6	Proteales	47	Platanaceae	72	Platanus raynoldsii	184	420	Angiosperm	1	Camp	1	Crabtree, 1987	2	NULL	Two Medicine	13	57.5485	-78.8712	57.6435	-81.127	56.7089	-83.9675	48.5272	-112.295	78.2	3.4	80	temperate lowland forest	2	2. temperate lowland forest	Coordinates are an average of sites shown in Fig. 4
	uncertain	11	uncertain	63	uncertain	101	Churchillia sp.	49	81	Angiosperm	1	Camp	1	Crabtree, 1987	2	NULL	Two Medicine	13	57.5485	-78.8712	57.6435	-81.127	56.7089	-83.9675	48.5272	-112.295	78.2	3.4	80	unknown	0	0. unknown	Coordinates are an average of sites shown in Fig. 4
	uncertain	11	uncertain	63	uncertain	101	Churchillia montana	49	80	Angiosperm	1	Camp	1	Crabtree, 1987	2	NULL	Two Medicine	13	57.5485	-78.8712	57.6435	-81.127	56.7089	-83.9675	48.5272	-112.295	78.2	3.4	80	unknown	0	0. unknown	Coordinates are an average of sites shown in Fig. 4
	Magnoliopsida	6	Theales	58	uncertain	101	Dicot 1, Theales	232	132	Angiosperm	1	Camp	1	Crabtree, 1987	2	NULL	Two Medicine	13	57.5485	-78.8712	57.6435	-81.127	56.7089	-83.9675	48.5272	-112.295	78.2	3.4	80	unknown	0	0. unknown	Coordinates are an average of sites shown in Fig. 4
	Magnoliopsida	6	Ebenales	18	uncertain	101	Dicot 43, Ebenales	83	145	Angiosperm	1	Camp	1	Crabtree, 1987	2	NULL	Two Medicine	13	57.5485	-78.8712	57.6435	-81.127	56.7089	-83.9675	48.5272	-112.295	78.2	3.4	80	tropical lowland forest	6	6. tropical lowland forest	Coordinates are an average of sites shown in Fig. 4
	Magnoliopsida	6	Sapindales	54	Aceraceae	1	Dicot 30, Aceraceae	1	142	Angiosperm	1	Camp	1	Crabtree, 1987	2	NULL	Two Medicine	13	57.5485	-78.8712	57.6435	-81.127	56.7089	-83.9675	48.5272	-112.295	78.2	3.4	80	temperate lowland forest	2	2. temperate lowland forest	Coordinates are an average of sites shown in Fig. 4
	Magnoliopsida	6	Rhamnales	50	uncertain	101	Dicot 4, Rhamnales	203	143	Angiosperm	1	Camp	1	Crabtree, 1987	2	NULL	Two Medicine	13	57.5485	-78.8712	57.6435	-81.127	56.7089	-83.9675	48.5272	-112.295	78.2	3.4	80	unknown	0	0. unknown	Coordinates are an average of sites shown in Fig. 4
	Magnoliopsida	6	Piperales	44	Aristolochiaceae	10	Aristolochites brittoni	18	24	Angiosperm	1	Camp	1	Dorf, 1955	4	NULL	Adaville	1	50.462	-80.5394	50.5344	-82.4813	49.5788	-84.9489	41.8432	-110.588	73.15	3.25	75	tropical lowland forest	6	6. tropical lowland forest	Lower Adaville Flora
	Pinopsida	9	Pinales	42	Araucariaceae	8	Brachyphyllum macrocarpum	31	45	Gymnosperm	3	Camp	1	Dorf, 1955	4	NULL	Adaville	1	50.462	-80.5394	50.5344	-82.4813	49.5788	-84.9489	41.8432	-110.588	73.15	3.25	75	coastal plain	4	4. coastal plain	Lower Adaville Flora
	Liliopsida	4	Zingiberales	62	Cannaceae	17	Canna magnifolia	32	46	Angiosperm	1	Camp	1	Dorf, 1955	4	NULL	Adaville	1	50.462	-80.5394	50.5344	-82.4813	49.5788	-84.9489	41.8432	-110.588	73.15	3.25	75	temperate lowland forest	2	2. temperate lowland forest	Lower Adaville Flora
	Magnoliopsida	6	Celastrales	8	Celastraceae	18	Celastrinites populifolius	41	65	Angiosperm	1	Camp	1	Dorf, 1955	4	NULL	Adaville	1	50.462	-80.5394	50.5344	-82.4813	49.5788	-84.9489	41.8432	-110.588	73.15	3.25	75	tropical lowland forest	6	6. tropical lowland forest	Lower Adaville Flora
	Magnoliopsida	6	Celastrales	8	Celastraceae	18	Celastrus sp.	43	68	Angiosperm	1	Camp	1	Dorf, 1955	4	NULL	Adaville	1	50.462	-80.5394	50.5344	-82.4813	49.5788	-84.9489	41.8432	-110.588	73.15	3.25	75	tropical lowland forest	6	6. tropical lowland forest	Lower Adaville Flora
	Magnoliopsida	6	Saxifragales	55	Cercidiphyllaceae	20	Cercidiphyllum arcticum	47	74	Angiosperm	1	Camp	1	Dorf, 1955	4	NULL	Adaville	1	50.462	-80.5394	50.5344	-82.4813	49.5788	-84.9489	41.8432	-110.588	73.15	3.25	75	temperate lowland forest	2	2. temperate lowland forest	Lower Adaville Flora
	Magnoliopsida	6	Laurales	31	Lauraceae	51	Cinnamomum sp.	50	86	Angiosperm	1	Camp	1	Dorf, 1955	4	NULL	Adaville	1	50.462	-80.5394	50.5344	-82.4813	49.5788	-84.9489	41.8432	-110.588	73.15	3.25	75	tropical lowland forest	6	6. tropical lowland forest	Lower Adaville Flora
	Magnoliopsida	6	Fabales	21	Fabaceae	38	Colutea speciosa	55	96	Angiosperm	1	Camp	1	Dorf, 1955	4	NULL	Adaville	1	50.462	-80.5394	50.5344	-82.4813	49.5788	-84.9489	41.8432	-110.588	73.15	3.25	75	wet, successional	5	5. wet, successional	Lower Adaville Flora
	Magnoliopsida	6	Ericales	20	Ebenaceae	33	Diospyros brachysepala	79	154	Angiosperm	1	Camp	1	Dorf, 1955	4	NULL	Adaville	1	50.462	-80.5394	50.5344	-82.4813	49.5788	-84.9489	41.8432	-110.588	73.15	3.25	75	tropical lowland forest	6	6. tropical lowland forest	Lower Adaville Flora
	Magnoliopsida	6	Fagales	22	Fagaceae	39	Dryophyllum subfalcatum	81	163	Angiosperm	1	Camp	1	Dorf, 1955	4	NULL	Adaville	1	50.462	-80.5394	50.5344	-82.4813	49.5788	-84.9489	41.8432	-110.588	73.15	3.25	75	temperate lowland forest	2	2. temperate lowland forest	Lower Adaville Flora
	Magnoliopsida	6	Rosales	51	Moraceae	61	Ficus planicostata	92	190	Angiosperm	1	Camp	1	Dorf, 1955	4	NULL	Adaville	1	50.462	-80.5394	50.5344	-82.4813	49.5788	-84.9489	41.8432	-110.588	73.15	3.25	75	tropical lowland forest	6	6. tropical lowland forest	Lower Adaville Flora
	Magnoliopsida	6	Rosales	51	Moraceae	61	Ficus praetrinervis	92	193	Angiosperm	1	Camp	1	Dorf, 1955	4	NULL	Adaville	1	50.462	-80.5394	50.5344	-82.4813	49.5788	-84.9489	41.8432	-110.588	73.15	3.25	75	tropical lowland forest	6	6. tropical lowland forest	Lower Adaville Flora
	Magnoliopsida	6	Rosales	51	Moraceae	61	Ficus schimperi	92	196	Angiosperm	1	Camp	1	Dorf, 1955	4	NULL	Adaville	1	50.462	-80.5394	50.5344	-82.4813	49.5788	-84.9489	41.8432	-110.588	73.15	3.25	75	tropical lowland forest	6	6. tropical lowland forest	Lower Adaville Flora
	Magnoliopsida	6	Rosales	51	Moraceae	61	Ficus trinervis	92	203	Angiosperm	1	Camp	1	Dorf, 1955	4	NULL	Adaville	1	50.462	-80.5394	50.5344	-82.4813	49.5788	-84.9489	41.8432	-110.588	73.15	3.25	75	tropical lowland forest	6	6. tropical lowland forest	Lower Adaville Flora
	Magnoliopsida	6	Fagales	22	Juglandaceae	50	Juglans sp.	110	245	Angiosperm	1	Camp	1	Dorf, 1955	4	NULL	Adaville	1	50.462	-80.5394	50.5344	-82.4813	49.5788	-84.9489	41.8432	-110.588	73.15	3.25	75	temperate lowland forest	2	2. temperate lowland forest	Lower Adaville Flora
	Magnoliopsida	6	Laurales	31	Lauraceae	51	Laurophyllum salicifolium	115	268	Angiosperm	1	Camp	1	Dorf, 1955	4	NULL	Adaville	1	50.462	-80.5394	50.5344	-82.4813	49.5788	-84.9489	41.8432	-110.588	73.15	3.25	75	tropical lowland forest	6	6. tropical lowland forest	Lower Adaville Flora
	Magnoliopsida	6	Laurales	31	Lauraceae	51	Laurophyllum coloradensis	115	264	Angiosperm	1	Camp	1	Dorf, 1955	4	NULL	Adaville	1	50.462	-80.5394	50.5344	-82.4813	49.5788	-84.9489	41.8432	-110.588	73.15	3.25	75	tropical lowland forest	6	6. tropical lowland forest	Lower Adaville Flora
	Magnoliopsida	6	Laurales	31	Lauraceae	51	Laurophyllum wardianum	115	272	Angiosperm	1	Camp	1	Dorf, 1955	4	NULL	Adaville	1	50.462	-80.5394	50.5344	-82.4813	49.5788	-84.9489	41.8432	-110.588	73.15	3.25	75	tropical lowland forest	6	6. tropical lowland forest	Lower Adaville Flora
	Magnoliopsida	6	Magnoliales	34	Magnoliaceae	55	Magnolia coalvillensis	127	290	Angiosperm	1	Camp	1	Dorf, 1955	4	NULL	Adaville	1	50.462	-80.5394	50.5344	-82.4813	49.5788	-84.9489	41.8432	-110.588	73.15	3.25	75	tropical lowland forest	6	6. tropical lowland forest	Lower Adaville Flora
	Magnoliopsida	6	Magnoliales	34	Magnoliaceae	55	Magnoliophyllum cordatum	131	304	Angiosperm	1	Camp	1	Dorf, 1955	4	NULL	Adaville	1	50.462	-80.5394	50.5344	-82.4813	49.5788	-84.9489	41.8432	-110.588	73.15	3.25	75	tropical lowland forest	6	6. tropical lowland forest	Lower Adaville Flora
	Magnoliopsida	6	Ranunculales	48	Menispermaceae	60	Menispermites septentrionales	141	319	Angiosperm	1	Camp	1	Dorf, 1955	4	NULL	Adaville	1	50.462	-80.5394	50.5344	-82.4813	49.5788	-84.9489	41.8432	-110.588	73.15	3.25	75	tropical lowland forest	6	6. tropical lowland forest	Lower Adaville Flora
	Magnoliopsida	6	Lamiales	30	Oleaceae	65	Phyllites celhanensis	172	370	Angiosperm	1	Camp	1	Dorf, 1955	4	NULL	Adaville	1	50.462	-80.5394	50.5344	-82.4813	49.5788	-84.9489	41.8432	-110.588	73.15	3.25	75	unknown	0	0. unknown	Lower Adaville Flora
	uncertain	11	uncertain	63	uncertain	101	Protophyllocladus polymorphus	193	444	Angiosperm	1	Camp	1	Dorf, 1955	4	NULL	Adaville	1	50.462	-80.5394	50.5344	-82.4813	49.5788	-84.9489	41.8432	-110.588	73.15	3.25	75	temperate lowland forest	2	2. temperate lowland forest	Lower Adaville Flora
	Magnoliopsida	6	Malvales	37	Malvaceae	57	Pterospermites wardii	195	450	Angiosperm	1	Camp	1	Dorf, 1955	4	NULL	Adaville	1	50.462	-80.5394	50.5344	-82.4813	49.5788	-84.9489	41.8432	-110.588	73.15	3.25	75	tropical lowland forest	6	6. tropical lowland forest	Lower Adaville Flora
	Magnoliopsida	6	Fagales	22	Fagaceae	39	Quercus lequereuxiana	197	454	Angiosperm	1	Camp	1	Dorf, 1955	4	NULL	Adaville	1	50.462	-80.5394	50.5344	-82.4813	49.5788	-84.9489	41.8432	-110.588	73.15	3.25	75	temperate lowland forest	2	2. temperate lowland forest	Lower Adaville Flora
	Magnoliopsida	6	Fagales	22	Fagaceae	39	Quercus viburnifolia	197	459	Angiosperm	1	Camp	1	Dorf, 1955	4	NULL	Adaville	1	50.462	-80.5394	50.5344	-82.4813	49.5788	-84.9489	41.8432	-110.588	73.15	3.25	75	temperate lowland forest	2	2. temperate lowland forest	Lower Adaville Flora
	Pinopsida	9	Pinales	42	Cupressaceae	24	Sequoia sp.	225	527	Gymnosperm	3	Camp	1	Dorf, 1955	4	NULL	Adaville	1	50.462	-80.5394	50.5344	-82.4813	49.5788	-84.9489	41.8432	-110.588	73.15	3.25	75	temperate lowland forest	2	2. temperate lowland forest	Lower Adaville Flora
	Magnoliopsida	6	Dipsacales	17	Adoxaceae	2	Viburnum marginatum	243	560	Angiosperm	1	Camp	1	Dorf, 1955	4	NULL	Adaville	1	50.462	-80.5394	50.5344	-82.4813	49.5788	-84.9489	41.8432	-110.588	73.15	3.25	75	temperate lowland forest	2	2. temperate lowland forest	Lower Adaville Flora
	Magnoliopsida	6	Dipsacales	17	Adoxaceae	2	Viburnum montanum	243	561	Angiosperm	1	Camp	1	Dorf, 1955	4	NULL	Adaville	1	50.462	-80.5394	50.5344	-82.4813	49.5788	-84.9489	41.8432	-110.588	73.15	3.25	75	temperate lowland forest	2	2. temperate lowland forest	Lower Adaville Flora
	Magnoliopsida	6	Dipsacales	17	Adoxaceae	2	Viburnum problematicum	243	563	Angiosperm	1	Camp	1	Dorf, 1955	4	NULL	Adaville	1	50.462	-80.5394	50.5344	-82.4813	49.5788	-84.9489	41.8432	-110.588	73.15	3.25	75	temperate lowland forest	2	2. temperate lowland forest	Lower Adaville Flora
	Magnoliopsida	6	Vitales	61	Vitaceae	96	Vitis stantonii	244	567	Angiosperm	1	Camp	1	Dorf, 1955	4	NULL	Adaville	1	50.462	-80.5394	50.5344	-82.4813	49.5788	-84.9489	41.8432	-110.588	73.15	3.25	75	temperate lowland forest	2	2. temperate lowland forest	Lower Adaville Flora
	Cycadopsida	2	Bennettitales	5	Williamsoniaceae	97	Williamsonia sp.	248	571	Gymnosperm	3	Camp	1	Dorf, 1955	4	NULL	Adaville	1	50.462	-80.5394	50.5344	-82.4813	49.5788	-84.9489	41.8432	-110.588	73.15	3.25	75	coastal plain	4	4. coastal plain	Lower Adaville Flora
	Polypodiopsida	10	Polypodiales	46	Blechnaceae	15	Woodwardia crenata	249	572	Fern/Moss	2	Camp	1	Dorf, 1955	4	NULL	Adaville	1	50.462	-80.5394	50.5344	-82.4813	49.5788	-84.9489	41.8432	-110.588	73.15	3.25	75	temperate lowland forest	2	2. temperate lowland forest	Lower Adaville Flora
	Cycadopsida	2	Cycadales	14	uncertain	101	Zamites albertensis	252	577	Gymnosperm	3	Camp	1	Dorf, 1955	4	NULL	Adaville	1	50.462	-80.5394	50.5344	-82.4813	49.5788	-84.9489	41.8432	-110.588	73.15	3.25	75	tropical lowland forest	6	6. tropical lowland forest	Lower Adaville Flora
	Pinopsida	9	Pinales	42	Araucariaceae	8	Araucarites longifolia	16	21	Gymnosperm	3	Camp	1	Dorf, 1955	4	NULL	Adaville	1	50.4887	-80.5626	50.5609	-82.505	49.6052	-84.9725	41.8662	-110.615	73.15	3.25	75	coastal plain	4	4. coastal plain	Middle Adaville Flora
	Magnoliopsida	6	Celastrales	8	Celastraceae	18	Celastrus taurinensis	43	70	Angiosperm	1	Camp	1	Dorf, 1955	4	NULL	Adaville	1	50.4887	-80.5626	50.5609	-82.505	49.6052	-84.9725	41.8662	-110.615	73.15	3.25	75	tropical lowland forest	6	6. tropical lowland forest	Middle Adaville Flora
	Magnoliopsida	6	Celastrales	8	Celastraceae	18	Celastrinites populifolius	41	65	Angiosperm	1	Camp	1	Dorf, 1955	4	NULL	Adaville	1	50.4887	-80.5626	50.5609	-82.505	49.6052	-84.9725	41.8662	-110.615	73.15	3.25	75	tropical lowland forest	6	6. tropical lowland forest	Middle Adaville Flora
	Magnoliopsida	6	Laurales	31	Lauraceae	51	Cinnamomum affine	50	82	Angiosperm	1	Camp	1	Dorf, 1955	4	NULL	Adaville	1	50.4887	-80.5626	50.5609	-82.505	49.6052	-84.9725	41.8662	-110.615	73.15	3.25	75	tropical lowland forest	6	6. tropical lowland forest	Middle Adaville Flora
	Magnoliopsida	6	Cornales (Umbellales)	12	Cornaceae	23	Cornophyllum wardii	58	101	Angiosperm	1	Camp	1	Dorf, 1955	4	NULL	Adaville	1	50.4887	-80.5626	50.5609	-82.505	49.6052	-84.9725	41.8662	-110.615	73.15	3.25	75	tropical lowland forest	6	6. tropical lowland forest	Middle Adaville Flora
	Magnoliopsida	6	Dilleniales	16	Dilleniaceae	31	Dillenites cleburni	78	153	Angiosperm	1	Camp	1	Dorf, 1955	4	NULL	Adaville	1	50.4887	-80.5626	50.5609	-82.505	49.6052	-84.9725	41.8662	-110.615	73.15	3.25	75	tropical lowland forest	6	6. tropical lowland forest	Middle Adaville Flora
	Magnoliopsida	6	Fagales	22	Fagaceae	39	Dryophyllum subfalcatum	81	163	Angiosperm	1	Camp	1	Dorf, 1955	4	NULL	Adaville	1	50.4887	-80.5626	50.5609	-82.505	49.6052	-84.9725	41.8662	-110.615	73.15	3.25	75	temperate lowland forest	2	2. temperate lowland forest	Middle Adaville Flora
	Magnoliopsida	6	Rosales	51	Moraceae	61	Ficus planicostata	92	190	Angiosperm	1	Camp	1	Dorf, 1955	4	NULL	Adaville	1	50.4887	-80.5626	50.5609	-82.505	49.6052	-84.9725	41.8662	-110.615	73.15	3.25	75	tropical lowland forest	6	6. tropical lowland forest	Middle Adaville Flora
	Magnoliopsida	6	Rosales	51	Moraceae	61	Ficus trinervis	92	203	Angiosperm	1	Camp	1	Dorf, 1955	4	NULL	Adaville	1	50.4887	-80.5626	50.5609	-82.505	49.6052	-84.9725	41.8662	-110.615	73.15	3.25	75	tropical lowland forest	6	6. tropical lowland forest	Middle Adaville Flora
	Magnoliopsida	6	Rosales	51	Moraceae	61	Ficus sp.	92	197	Angiosperm	1	Camp	1	Dorf, 1955	4	NULL	Adaville	1	50.4887	-80.5626	50.5609	-82.505	49.6052	-84.9725	41.8662	-110.615	73.15	3.25	75	tropical lowland forest	6	6. tropical lowland forest	Middle Adaville Flora
	Magnoliopsida	6	Proteales	47	Platanaceae	72	Grewiopsis saportana	103	234	Angiosperm	1	Camp	1	Dorf, 1955	4	NULL	Adaville	1	50.4887	-80.5626	50.5609	-82.505	49.6052	-84.9725	41.8662	-110.615	73.15	3.25	75	temperate lowland forest	2	2. temperate lowland forest	Middle Adaville Flora
	Magnoliopsida	6	Fagales	22	Juglandaceae	50	Juglans rhamnoides	110	243	Angiosperm	1	Camp	1	Dorf, 1955	4	NULL	Adaville	1	50.4887	-80.5626	50.5609	-82.505	49.6052	-84.9725	41.8662	-110.615	73.15	3.25	75	temperate lowland forest	2	2. temperate lowland forest	Middle Adaville Flora
	Magnoliopsida	6	Laurales	31	Lauraceae	51	Laurophyllum meeki	115	266	Angiosperm	1	Camp	1	Dorf, 1955	4	NULL	Adaville	1	50.4887	-80.5626	50.5609	-82.505	49.6052	-84.9725	41.8662	-110.615	73.15	3.25	75	tropical lowland forest	6	6. tropical lowland forest	Middle Adaville Flora
	Magnoliopsida	6	Laurales	31	Lauraceae	51	Laurophyllum saliciofolium	115	269	Angiosperm	1	Camp	1	Dorf, 1955	4	NULL	Adaville	1	50.4887	-80.5626	50.5609	-82.505	49.6052	-84.9725	41.8662	-110.615	73.15	3.25	75	tropical lowland forest	6	6. tropical lowland forest	Middle Adaville Flora
	Magnoliopsida	6	Laurales	31	Lauraceae	51	Laurophyllum wardianum	115	272	Angiosperm	1	Camp	1	Dorf, 1955	4	NULL	Adaville	1	50.4887	-80.5626	50.5609	-82.505	49.6052	-84.9725	41.8662	-110.615	73.15	3.25	75	tropical lowland forest	6	6. tropical lowland forest	Middle Adaville Flora
	Magnoliopsida	6	Malpighiales	36	Salicaceae	84	Myrtophyllum torreyi	149	333	Angiosperm	1	Camp	1	Dorf, 1955	4	NULL	Adaville	1	50.4887	-80.5626	50.5609	-82.505	49.6052	-84.9725	41.8662	-110.615	73.15	3.25	75	tropical lowland forest	6	6. tropical lowland forest	Middle Adaville Flora
	Magnoliopsida	6	Proteales	47	Nelumbonaceae	63	Nelumbo crossii	153	338	Angiosperm	1	Camp	1	Dorf, 1955	4	NULL	Adaville	1	50.4887	-80.5626	50.5609	-82.505	49.6052	-84.9725	41.8662	-110.615	73.15	3.25	75	estuarine, aquatic	7	7. estuarine, aquatic	Middle Adaville Flora
	Magnoliopsida	6	Sapindales	54	Anacardiaceae	4	Pistacia eriensis	179	383	Angiosperm	1	Camp	1	Dorf, 1955	4	NULL	Adaville	1	50.4887	-80.5626	50.5609	-82.505	49.6052	-84.9725	41.8662	-110.615	73.15	3.25	75	open scrubland	8	8. open scrubland	Middle Adaville Flora
	Magnoliopsida	6	Proteales	47	Platanaceae	72	Platanophyllum sp.	183	415	Angiosperm	1	Camp	1	Dorf, 1955	4	NULL	Adaville	1	50.4887	-80.5626	50.5609	-82.505	49.6052	-84.9725	41.8662	-110.615	73.15	3.25	75	temperate lowland forest	2	2. temperate lowland forest	Middle Adaville Flora
	Magnoliopsida	6	Proteales	47	Platanaceae	72	Platanus sp.	184	421	Angiosperm	1	Camp	1	Dorf, 1955	4	NULL	Adaville	1	50.4887	-80.5626	50.5609	-82.505	49.6052	-84.9725	41.8662	-110.615	73.15	3.25	75	temperate lowland forest	2	2. temperate lowland forest	Middle Adaville Flora
	Magnoliopsida	6	Fagales	22	Fagaceae	39	Quercus viburnifolia	197	459	Angiosperm	1	Camp	1	Dorf, 1955	4	NULL	Adaville	1	50.4887	-80.5626	50.5609	-82.505	49.6052	-84.9725	41.8662	-110.615	73.15	3.25	75	temperate lowland forest	2	2. temperate lowland forest	Middle Adaville Flora
	Pinopsida	9	Pinales	42	Cupressaceae	24	Sequoia dakotensis	225	521	Gymnosperm	3	Camp	1	Dorf, 1955	4	NULL	Adaville	1	50.4887	-80.5626	50.5609	-82.505	49.6052	-84.9725	41.8662	-110.615	73.15	3.25	75	temperate lowland forest	2	2. temperate lowland forest	Middle Adaville Flora
	Pinopsida	9	Pinales	42	Cupressaceae	24	Sequoia sp.	225	527	Gymnosperm	3	Camp	1	Dorf, 1955	4	NULL	Adaville	1	50.4887	-80.5626	50.5609	-82.505	49.6052	-84.9725	41.8662	-110.615	73.15	3.25	75	temperate lowland forest	2	2. temperate lowland forest	Middle Adaville Flora
	Magnoliopsida	6	Dipsacales	17	Adoxaceae	2	Viburnum marginatum	243	560	Angiosperm	1	Camp	1	Dorf, 1955	4	NULL	Adaville	1	50.4887	-80.5626	50.5609	-82.505	49.6052	-84.9725	41.8662	-110.615	73.15	3.25	75	temperate lowland forest	2	2. temperate lowland forest	Middle Adaville Flora
	Polypodiopsida	10	Schizaeales	56	Schizaeaceae	88	Anemia hesperia	8	10	Fern/Moss	2	Camp	1	Hunt and Lucas 1992, Robison et al., 1982; Tidwell et al., 1981; Knowlton, 1916	5	NULL	Fruitland	7	45.2956	-81.1381	45.3639	-82.998	44.4051	-85.3784	36.51	-108.32	75.65	0.45	75	tropical lowland forest	6	6. tropical lowland forest	NULL
	Polypodiopsida	10	Schizaeales	56	Schizaeaceae	88	Anemia sp.	8	11	Fern/Moss	2	Camp	1	Hunt and Lucas 1992, Robison et al., 1982; Tidwell et al., 1981; Knowlton, 1916	5	NULL	Fruitland	7	45.2956	-81.1381	45.3639	-82.998	44.4051	-85.3784	36.51	-108.32	75.65	0.45	75	tropical lowland forest	6	6. tropical lowland forest	NULL
	Pinopsida	9	Pinales	42	Araucariaceae	8	Araucaria longifolia	13	17	Gymnosperm	3	Camp	1	Hunt and Lucas 1992, Robison et al., 1982; Tidwell et al., 1981; Knowlton, 1916	5	NULL	Fruitland	7	45.2956	-81.1381	45.3639	-82.998	44.4051	-85.3784	36.51	-108.32	75.65	0.45	75	coastal plain	4	4. coastal plain	NULL
	Pinopsida	9	Pinales	42	Araucariaceae	8	Araucaria sp.	13	18	Gymnosperm	3	Camp	1	Hunt and Lucas 1992, Robison et al., 1982; Tidwell et al., 1981; Knowlton, 1916	5	NULL	Fruitland	7	45.2956	-81.1381	45.3639	-82.998	44.4051	-85.3784	36.51	-108.32	75.65	0.45	75	coastal plain	4	4. coastal plain	NULL
	Pinopsida	9	Pinales	42	Araucariaceae	8	Araucaria sp.	13	18	Gymnosperm	3	Camp	1	Hunt and Lucas 1992, Robison et al., 1982; Tidwell et al., 1981; Knowlton, 1916	5	NULL	Kirtland	10	45.0628	-81.1463	45.1312	-83.0028	44.1723	-85.38	36.2832	-108.255	74.3	0.9	75	coastal plain	4	4. coastal plain	NULL
	Polypodiopsida	10	Polypodiales	46	Aspleniaceae	11	Asplenium coloradense	24	33	Fern/Moss	2	Camp	1	Hunt and Lucas 1992, Robison et al., 1982; Tidwell et al., 1981; Knowlton, 1916	5	NULL	Fruitland	7	45.2956	-81.1381	45.3639	-82.998	44.4051	-85.3784	36.51	-108.32	75.65	0.45	75	tropical lowland forest	6	6. tropical lowland forest	NULL
	Polypodiopsida	10	Polypodiales	46	Aspleniaceae	11	Asplenium neomexicana	24	34	Fern/Moss	2	Camp	1	Hunt and Lucas 1992, Robison et al., 1982; Tidwell et al., 1981; Knowlton, 1916	5	NULL	Kirtland	10	45.0628	-81.1463	45.1312	-83.0028	44.1723	-85.38	36.2832	-108.255	74.3	0.9	75	tropical lowland forest	6	6. tropical lowland forest	NULL
	Polypodiopsida	10	Polypodiales	46	Aspleniaceae	11	Asplenium sp.	24	35	Fern/Moss	2	Camp	1	Hunt and Lucas 1992, Robison et al., 1982; Tidwell et al., 1981; Knowlton, 1916	5	NULL	Kirtland	10	45.0628	-81.1463	45.1312	-83.0028	44.1723	-85.38	36.2832	-108.255	74.3	0.9	75	tropical lowland forest	6	6. tropical lowland forest	NULL
	Pinopsida	9	Pinales	42	Araucariaceae	8	Brachyphyllum macrocarpum	31	45	Gymnosperm	3	Camp	1	Hunt and Lucas 1992, Robison et al., 1982; Tidwell et al., 1981; Knowlton, 1916	5	NULL	Fruitland	7	45.2956	-81.1381	45.3639	-82.998	44.4051	-85.3784	36.51	-108.32	75.65	0.45	75	coastal plain	4	4. coastal plain	NULL
	Liliopsida	4	Zingiberales	62	Cannaceae	17	Canna magnifolia	32	46	Angiosperm	1	Camp	1	Hunt and Lucas 1992, Robison et al., 1982; Tidwell et al., 1981; Knowlton, 1916	5	NULL	Kirtland	10	45.0628	-81.1463	45.1312	-83.0028	44.1723	-85.38	36.2832	-108.255	74.3	0.9	75	temperate lowland forest	2	2. temperate lowland forest	NULL
	Magnoliopsida	6	Rosales?	52	Ulmaceae?	94	Carpites baueri	34	50	Angiosperm	1	Camp	1	Hunt and Lucas 1992, Robison et al., 1982; Tidwell et al., 1981; Knowlton, 1916	5	NULL	Fruitland	7	45.2956	-81.1381	45.3639	-82.998	44.4051	-85.3784	36.51	-108.32	75.65	0.45	75	temperate lowland forest	2	2. temperate lowland forest	NULL
	Magnoliopsida	6	Rosales?	52	Ulmaceae?	94	Carpites baueri	34	50	Angiosperm	1	Camp	1	Hunt and Lucas 1992, Robison et al., 1982; Tidwell et al., 1981; Knowlton, 1916	5	NULL	Kirtland	10	45.0628	-81.1463	45.1312	-83.0028	44.1723	-85.38	36.2832	-108.255	74.3	0.9	75	temperate lowland forest	2	2. temperate lowland forest	NULL
	Magnoliopsida	6	Rosales?	52	Ulmaceae?	94	Carpites lancensis	34	52	Angiosperm	1	Camp	1	Hunt and Lucas 1992, Robison et al., 1982; Tidwell et al., 1981; Knowlton, 1916	5	NULL	Kirtland	10	45.0628	-81.1463	45.1312	-83.0028	44.1723	-85.38	36.2832	-108.255	74.3	0.9	75	temperate lowland forest	2	2. temperate lowland forest	NULL
	Magnoliopsida	6	Rosales?	52	Ulmaceae?	94	Carpites sp.	34	54	Angiosperm	1	Camp	1	Hunt and Lucas 1992, Robison et al., 1982; Tidwell et al., 1981; Knowlton, 1916	5	NULL	Fruitland	7	45.2956	-81.1381	45.3639	-82.998	44.4051	-85.3784	36.51	-108.32	75.65	0.45	75	temperate lowland forest	2	2. temperate lowland forest	NULL
	Magnoliopsida	6	Rosales?	52	Ulmaceae?	94	Carpites sp.	34	54	Angiosperm	1	Camp	1	Hunt and Lucas 1992, Robison et al., 1982; Tidwell et al., 1981; Knowlton, 1916	5	NULL	Kirtland	10	45.0628	-81.1463	45.1312	-83.0028	44.1723	-85.38	36.2832	-108.255	74.3	0.9	75	temperate lowland forest	2	2. temperate lowland forest	NULL
	Magnoliopsida	6	Fagales	22	Juglandaceae	50	Carya antiquorum	36	59	Angiosperm	1	Camp	1	Hunt and Lucas 1992, Robison et al., 1982; Tidwell et al., 1981; Knowlton, 1916	5	NULL	Kirtland	10	45.0628	-81.1463	45.1312	-83.0028	44.1723	-85.38	36.2832	-108.255	74.3	0.9	75	temperate lowland forest	2	2. temperate lowland forest	NULL
	Magnoliopsida	6	Saxifragales	55	Cercidiphyllaceae	20	Cercidiphyllum sp.	47	77	Angiosperm	1	Camp	1	Hunt and Lucas 1992, Robison et al., 1982; Tidwell et al., 1981; Knowlton, 1916	5	NULL	Fruitland	7	45.2956	-81.1381	45.3639	-82.998	44.4051	-85.3784	36.51	-108.32	75.65	0.45	75	temperate lowland forest	2	2. temperate lowland forest	NULL
	Magnoliopsida	6	Laurales	31	Lauraceae	51	Cinnamomum sezannense	50	85	Angiosperm	1	Camp	1	Hunt and Lucas 1992, Robison et al., 1982; Tidwell et al., 1981; Knowlton, 1916	5	NULL	Fruitland	7	45.2956	-81.1381	45.3639	-82.998	44.4051	-85.3784	36.51	-108.32	75.65	0.45	75	tropical lowland forest	6	6. tropical lowland forest	NULL
	Magnoliopsida	6	Vitales	61	Vitaceae	96	Cissus marginata	52	93	Angiosperm	1	Camp	1	Hunt and Lucas 1992, Robison et al., 1982; Tidwell et al., 1981; Knowlton, 1916	5	NULL	Kirtland	10	45.0628	-81.1463	45.1312	-83.0028	44.1723	-85.38	36.2832	-108.255	74.3	0.9	75	upland forest	1	1. upland forest	NULL
	Polypodiopsida	10	Filicales	23	uncertain	101	Cladophlebis sp.	53	94	Fern/Moss	2	Camp	1	Hunt and Lucas 1992, Robison et al., 1982; Tidwell et al., 1981; Knowlton, 1916	5	NULL	Kirtland	10	45.0628	-81.1463	45.1312	-83.0028	44.1723	-85.38	36.2832	-108.255	74.3	0.9	75	tropical lowland forest	6	6. tropical lowland forest	NULL
	Pinopsida	9	Pinales	42	Cupressaceae	24	Cunninghamites pulchellus	62	112	Gymnosperm	3	Camp	1	Hunt and Lucas 1992, Robison et al., 1982; Tidwell et al., 1981; Knowlton, 1916	5	NULL	Fruitland	7	45.2956	-81.1381	45.3639	-82.998	44.4051	-85.3784	36.51	-108.32	75.65	0.45	75	temperate lowland forest	2	2. temperate lowland forest	NULL
	Pinopsida	9	Pinales	42	Cupressaceae	24	Cupressinoxylon sp.	65	120	Gymnosperm	3	Camp	1	Hunt and Lucas 1992, Robison et al., 1982; Tidwell et al., 1981; Knowlton, 1916	5	NULL	Kirtland	10	45.0628	-81.1463	45.1312	-83.0028	44.1723	-85.38	36.2832	-108.255	74.3	0.9	75	temperate lowland forest	2	2. temperate lowland forest	NULL
	Polypodiopsida	10	Cyatheales	13	Cyatheaceae	25	Cyathea pinnata	66	121	Fern/Moss	2	Camp	1	Hunt and Lucas 1992, Robison et al., 1982; Tidwell et al., 1981; Knowlton, 1916	5	NULL	Kirtland	10	45.0628	-81.1463	45.1312	-83.0028	44.1723	-85.38	36.2832	-108.255	74.3	0.9	75	tropical lowland forest	6	6. tropical lowland forest	NULL
	Liliopsida	4	Poales	45	Cyperaceae	27	Cyperacites sp.	68	124	Angiosperm	1	Camp	1	Hunt and Lucas 1992, Robison et al., 1982; Tidwell et al., 1981; Knowlton, 1916	5	NULL	Kirtland	10	45.0628	-81.1463	45.1312	-83.0028	44.1723	-85.38	36.2832	-108.255	74.3	0.9	75	wet, successional	5	5. wet, successional	NULL
	Magnoliopsida	6	Dilleniales	16	Dilleniaceae	31	Dillenites cleburni	78	153	Angiosperm	1	Camp	1	Hunt and Lucas 1992, Robison et al., 1982; Tidwell et al., 1981; Knowlton, 1916	5	NULL	Kirtland	10	45.0628	-81.1463	45.1312	-83.0028	44.1723	-85.38	36.2832	-108.255	74.3	0.9	75	tropical lowland forest	6	6. tropical lowland forest	NULL
	Magnoliopsida	6	Fagales	22	Fagaceae	39	Dryophyllum subfalcatum	81	163	Angiosperm	1	Camp	1	Hunt and Lucas 1992, Robison et al., 1982; Tidwell et al., 1981; Knowlton, 1916	5	NULL	Kirtland	10	45.0628	-81.1463	45.1312	-83.0028	44.1723	-85.38	36.2832	-108.255	74.3	0.9	75	temperate lowland forest	2	2. temperate lowland forest	NULL
	Magnoliopsida	6	Rosales	51	Moraceae	61	Ficus baueri	92	176	Angiosperm	1	Camp	1	Hunt and Lucas 1992, Robison et al., 1982; Tidwell et al., 1981; Knowlton, 1916	5	NULL	Fruitland	7	45.2956	-81.1381	45.3639	-82.998	44.4051	-85.3784	36.51	-108.32	75.65	0.45	75	tropical lowland forest	6	6. tropical lowland forest	NULL
	Magnoliopsida	6	Rosales	51	Moraceae	61	Ficus crossii	92	178	Angiosperm	1	Camp	1	Hunt and Lucas 1992, Robison et al., 1982; Tidwell et al., 1981; Knowlton, 1916	5	NULL	Kirtland	10	45.0628	-81.1463	45.1312	-83.0028	44.1723	-85.38	36.2832	-108.255	74.3	0.9	75	tropical lowland forest	6	6. tropical lowland forest	NULL
	Magnoliopsida	6	Rosales	51	Moraceae	61	Ficus curta	92	179	Angiosperm	1	Camp	1	Hunt and Lucas 1992, Robison et al., 1982; Tidwell et al., 1981; Knowlton, 1916	5	NULL	Fruitland	7	45.2956	-81.1381	45.3639	-82.998	44.4051	-85.3784	36.51	-108.32	75.65	0.45	75	tropical lowland forest	6	6. tropical lowland forest	NULL
	Magnoliopsida	6	Rosales	51	Moraceae	61	Ficus leei	92	187	Angiosperm	1	Camp	1	Hunt and Lucas 1992, Robison et al., 1982; Tidwell et al., 1981; Knowlton, 1916	5	NULL	Fruitland	7	45.2956	-81.1381	45.3639	-82.998	44.4051	-85.3784	36.51	-108.32	75.65	0.45	75	tropical lowland forest	6	6. tropical lowland forest	NULL
	Magnoliopsida	6	Rosales	51	Moraceae	61	Ficus leei	92	187	Angiosperm	1	Camp	1	Hunt and Lucas 1992, Robison et al., 1982; Tidwell et al., 1981; Knowlton, 1916	5	NULL	Kirtland	10	45.0628	-81.1463	45.1312	-83.0028	44.1723	-85.38	36.2832	-108.255	74.3	0.9	75	tropical lowland forest	6	6. tropical lowland forest	NULL
	Magnoliopsida	6	Rosales	51	Moraceae	61	Ficus planicostata	92	190	Angiosperm	1	Camp	1	Hunt and Lucas 1992, Robison et al., 1982; Tidwell et al., 1981; Knowlton, 1916	5	NULL	Fruitland	7	45.2956	-81.1381	45.3639	-82.998	44.4051	-85.3784	36.51	-108.32	75.65	0.45	75	tropical lowland forest	6	6. tropical lowland forest	NULL
	Magnoliopsida	6	Rosales	51	Moraceae	61	Ficus praelatifolia	92	192	Angiosperm	1	Camp	1	Hunt and Lucas 1992, Robison et al., 1982; Tidwell et al., 1981; Knowlton, 1916	5	NULL	Fruitland	7	45.2956	-81.1381	45.3639	-82.998	44.4051	-85.3784	36.51	-108.32	75.65	0.45	75	tropical lowland forest	6	6. tropical lowland forest	NULL
	Magnoliopsida	6	Rosales	51	Moraceae	61	Ficus praetrinervis	92	193	Angiosperm	1	Camp	1	Hunt and Lucas 1992, Robison et al., 1982; Tidwell et al., 1981; Knowlton, 1916	5	NULL	Fruitland	7	45.2956	-81.1381	45.3639	-82.998	44.4051	-85.3784	36.51	-108.32	75.65	0.45	75	tropical lowland forest	6	6. tropical lowland forest	NULL
	Magnoliopsida	6	Rosales	51	Moraceae	61	Ficus rhamnoides	92	195	Angiosperm	1	Camp	1	Hunt and Lucas 1992, Robison et al., 1982; Tidwell et al., 1981; Knowlton, 1916	5	NULL	Fruitland	7	45.2956	-81.1381	45.3639	-82.998	44.4051	-85.3784	36.51	-108.32	75.65	0.45	75	tropical lowland forest	6	6. tropical lowland forest	NULL
	Magnoliopsida	6	Rosales	51	Moraceae	61	Ficus sp.	92	197	Angiosperm	1	Camp	1	Hunt and Lucas 1992, Robison et al., 1982; Tidwell et al., 1981; Knowlton, 1916	5	NULL	Fruitland	7	45.2956	-81.1381	45.3639	-82.998	44.4051	-85.3784	36.51	-108.32	75.65	0.45	75	tropical lowland forest	6	6. tropical lowland forest	NULL
	Magnoliopsida	6	Rosales	51	Moraceae	61	Ficus squarrosa	92	200	Angiosperm	1	Camp	1	Hunt and Lucas 1992, Robison et al., 1982; Tidwell et al., 1981; Knowlton, 1916	5	NULL	Fruitland	7	45.2956	-81.1381	45.3639	-82.998	44.4051	-85.3784	36.51	-108.32	75.65	0.45	75	tropical lowland forest	6	6. tropical lowland forest	NULL
	Magnoliopsida	6	Rosales	51	Moraceae	61	Ficus starkvillensis	92	201	Angiosperm	1	Camp	1	Hunt and Lucas 1992, Robison et al., 1982; Tidwell et al., 1981; Knowlton, 1916	5	NULL	Fruitland	7	45.2956	-81.1381	45.3639	-82.998	44.4051	-85.3784	36.51	-108.32	75.65	0.45	75	tropical lowland forest	6	6. tropical lowland forest	NULL
	Magnoliopsida	6	Rosales	51	Moraceae	61	Ficus trinervis	92	203	Angiosperm	1	Camp	1	Hunt and Lucas 1992, Robison et al., 1982; Tidwell et al., 1981; Knowlton, 1916	5	NULL	Kirtland	10	45.0628	-81.1463	45.1312	-83.0028	44.1723	-85.38	36.2832	-108.255	74.3	0.9	75	tropical lowland forest	6	6. tropical lowland forest	NULL
	Magnoliopsida	6	Rosales	51	Moraceae	61	Ficus wardii	92	204	Angiosperm	1	Camp	1	Hunt and Lucas 1992, Robison et al., 1982; Tidwell et al., 1981; Knowlton, 1916	5	NULL	Fruitland	7	45.2956	-81.1381	45.3639	-82.998	44.4051	-85.3784	36.51	-108.32	75.65	0.45	75	tropical lowland forest	6	6. tropical lowland forest	NULL
	Liliopsida	4	Commelinales	10	Pontederiaceae	76	Heteranthera cretacea	108	239	Angiosperm	1	Camp	1	Hunt and Lucas 1992, Robison et al., 1982; Tidwell et al., 1981; Knowlton, 1916	5	NULL	Fruitland	7	45.2956	-81.1381	45.3639	-82.998	44.4051	-85.3784	36.51	-108.32	75.65	0.45	75	estuarine, aquatic	7	7. estuarine, aquatic	NULL
	Magnoliopsida	6	Laurales	31	Lauraceae	51	Laurophyllum salcifolium	115	267	Angiosperm	1	Camp	1	Hunt and Lucas 1992, Robison et al., 1982; Tidwell et al., 1981; Knowlton, 1916	5	NULL	Kirtland	10	45.0628	-81.1463	45.1312	-83.0028	44.1723	-85.38	36.2832	-108.255	74.3	0.9	75	tropical lowland forest	6	6. tropical lowland forest	NULL
	Magnoliopsida	6	Laurales	31	Lauraceae	51	Laurophyllum sp.	115	270	Angiosperm	1	Camp	1	Hunt and Lucas 1992, Robison et al., 1982; Tidwell et al., 1981; Knowlton, 1916	5	NULL	Kirtland	10	45.0628	-81.1463	45.1312	-83.0028	44.1723	-85.38	36.2832	-108.255	74.3	0.9	75	tropical lowland forest	6	6. tropical lowland forest	NULL
	Magnoliopsida	6	Laurales	31	Lauraceae	51	Laurophyllum wardiana	115	271	Angiosperm	1	Camp	1	Hunt and Lucas 1992, Robison et al., 1982; Tidwell et al., 1981; Knowlton, 1916	5	NULL	Kirtland	10	45.0628	-81.1463	45.1312	-83.0028	44.1723	-85.38	36.2832	-108.255	74.3	0.9	75	tropical lowland forest	6	6. tropical lowland forest	NULL
	Magnoliopsida	6	Laurales	31	Lauraceae	51	Laurus baueri	116	273	Angiosperm	1	Camp	1	Hunt and Lucas 1992, Robison et al., 1982; Tidwell et al., 1981; Knowlton, 1916	5	NULL	Fruitland	7	45.2956	-81.1381	45.3639	-82.998	44.4051	-85.3784	36.51	-108.32	75.65	0.45	75	coastal plain	4	4. coastal plain	NULL
	Magnoliopsida	6	Laurales	31	Lauraceae	51	Laurus coloradensis	116	274	Angiosperm	1	Camp	1	Hunt and Lucas 1992, Robison et al., 1982; Tidwell et al., 1981; Knowlton, 1916	5	NULL	Fruitland	7	45.2956	-81.1381	45.3639	-82.998	44.4051	-85.3784	36.51	-108.32	75.65	0.45	75	coastal plain	4	4. coastal plain	NULL
	Magnoliopsida	6	Laurales	31	Lauraceae	51	Laurus coloradensis	116	274	Angiosperm	1	Camp	1	Hunt and Lucas 1992, Robison et al., 1982; Tidwell et al., 1981; Knowlton, 1916	5	NULL	Kirtland	10	45.0628	-81.1463	45.1312	-83.0028	44.1723	-85.38	36.2832	-108.255	74.3	0.9	75	coastal plain	4	4. coastal plain	NULL
	Magnoliopsida	6	Garryales	24	Eucommiaceae	36	Leguminosites neomexicana	118	278	Angiosperm	1	Camp	1	Hunt and Lucas 1992, Robison et al., 1982; Tidwell et al., 1981; Knowlton, 1916	5	NULL	Fruitland	7	45.2956	-81.1381	45.3639	-82.998	44.4051	-85.3784	36.51	-108.32	75.65	0.45	75	tropical lowland forest	6	6. tropical lowland forest	NULL
	Magnoliopsida	6	Garryales	24	Eucommiaceae	36	Leguminosites neomexicana	118	278	Angiosperm	1	Camp	1	Hunt and Lucas 1992, Robison et al., 1982; Tidwell et al., 1981; Knowlton, 1916	5	NULL	Kirtland	10	45.0628	-81.1463	45.1312	-83.0028	44.1723	-85.38	36.2832	-108.255	74.3	0.9	75	tropical lowland forest	6	6. tropical lowland forest	NULL
	Magnoliopsida	6	Garryales	24	Eucommiaceae	36	Leguminosites sp.	118	279	Angiosperm	1	Camp	1	Hunt and Lucas 1992, Robison et al., 1982; Tidwell et al., 1981; Knowlton, 1916	5	NULL	Kirtland	10	45.0628	-81.1463	45.1312	-83.0028	44.1723	-85.38	36.2832	-108.255	74.3	0.9	75	tropical lowland forest	6	6. tropical lowland forest	NULL
	Magnoliopsida	6	Magnoliales	34	Magnoliaceae	55	Magnifolia berryi	126	289	Angiosperm	1	Camp	1	Hunt and Lucas 1992, Robison et al., 1982; Tidwell et al., 1981; Knowlton, 1916	5	NULL	Kirtland	10	45.0628	-81.1463	45.1312	-83.0028	44.1723	-85.38	36.2832	-108.255	74.3	0.9	75	tropical lowland forest	6	6. tropical lowland forest	NULL
	Magnoliopsida	6	Magnoliales	34	Magnoliaceae	55	Magnolia cordifolia	127	291	Angiosperm	1	Camp	1	Hunt and Lucas 1992, Robison et al., 1982; Tidwell et al., 1981; Knowlton, 1916	5	NULL	Fruitland	7	45.2956	-81.1381	45.3639	-82.998	44.4051	-85.3784	36.51	-108.32	75.65	0.45	75	tropical lowland forest	6	6. tropical lowland forest	NULL
	Magnoliopsida	6	Ranunculales	48	Menispermaceae	60	Menispermites belli	141	317	Angiosperm	1	Camp	1	Hunt and Lucas 1992, Robison et al., 1982; Tidwell et al., 1981; Knowlton, 1916	5	NULL	Kirtland	10	45.0628	-81.1463	45.1312	-83.0028	44.1723	-85.38	36.2832	-108.255	74.3	0.9	75	tropical lowland forest	6	6. tropical lowland forest	NULL
	Magnoliopsida	6	Ranunculales	48	Menispermaceae	60	Menispermites sp.	141	320	Angiosperm	1	Camp	1	Hunt and Lucas 1992, Robison et al., 1982; Tidwell et al., 1981; Knowlton, 1916	5	NULL	Fruitland	7	45.2956	-81.1381	45.3639	-82.998	44.4051	-85.3784	36.51	-108.32	75.65	0.45	75	tropical lowland forest	6	6. tropical lowland forest	NULL
	Magnoliopsida	6	Malpighiales	36	Salicaceae	84	Myrtophyllum neomexicanum	149	332	Angiosperm	1	Camp	1	Hunt and Lucas 1992, Robison et al., 1982; Tidwell et al., 1981; Knowlton, 1916	5	NULL	Kirtland	10	45.0628	-81.1463	45.1312	-83.0028	44.1723	-85.38	36.2832	-108.255	74.3	0.9	75	tropical lowland forest	6	6. tropical lowland forest	NULL
	Magnoliopsida	6	Malpighiales	36	Salicaceae	84	Myrtophyllum torreyi	149	333	Angiosperm	1	Camp	1	Hunt and Lucas 1992, Robison et al., 1982; Tidwell et al., 1981; Knowlton, 1916	5	NULL	Fruitland	7	45.2956	-81.1381	45.3639	-82.998	44.4051	-85.3784	36.51	-108.32	75.65	0.45	75	tropical lowland forest	6	6. tropical lowland forest	NULL
	Magnoliopsida	6	Malpighiales	36	Salicaceae	84	Myrtophyllum torreyi	149	333	Angiosperm	1	Camp	1	Hunt and Lucas 1992, Robison et al., 1982; Tidwell et al., 1981; Knowlton, 1916	5	NULL	Kirtland	10	45.0628	-81.1463	45.1312	-83.0028	44.1723	-85.38	36.2832	-108.255	74.3	0.9	75	tropical lowland forest	6	6. tropical lowland forest	NULL
	Magnoliopsida	6	Proteales	47	Nelumbonaceae	63	Nelumbo sp.	153	340	Angiosperm	1	Camp	1	Hunt and Lucas 1992, Robison et al., 1982; Tidwell et al., 1981; Knowlton, 1916	5	NULL	Fruitland	7	45.2956	-81.1381	45.3639	-82.998	44.4051	-85.3784	36.51	-108.32	75.65	0.45	75	estuarine, aquatic	7	7. estuarine, aquatic	NULL
	Polypodiopsida	10	Polypodiales	46	Onocleaceae	66	Onoclea neomexicana	157	348	Fern/Moss	2	Camp	1	Hunt and Lucas 1992, Robison et al., 1982; Tidwell et al., 1981; Knowlton, 1916	5	NULL	Kirtland	10	45.0628	-81.1463	45.1312	-83.0028	44.1723	-85.38	36.2832	-108.255	74.3	0.9	75	wet, successional	5	5. wet, successional	NULL
	Polypodiopsida	10	Osmundales	41	Osmundaceae	67	Osmunda hollicki	158	350	Fern/Moss	2	Camp	1	Hunt and Lucas 1992, Robison et al., 1982; Tidwell et al., 1981; Knowlton, 1916	5	NULL	Kirtland	10	45.0628	-81.1463	45.1312	-83.0028	44.1723	-85.38	36.2832	-108.255	74.3	0.9	75	temperate lowland forest	2	2. temperate lowland forest	NULL
	Liliopsida	4	Arecales	3	Arecaceae	9	Palmoxylon spp.	163	358	Angiosperm	1	Camp	1	Hunt and Lucas 1992, Robison et al., 1982; Tidwell et al., 1981; Knowlton, 1916	5	NULL	Kirtland	10	45.0628	-81.1463	45.1312	-83.0028	44.1723	-85.38	36.2832	-108.255	74.3	0.9	75	tropical lowland forest	6	6. tropical lowland forest	NULL
	Liliopsida	4	Arecales	3	Arecaceae	9	Phoenocites sp.	170	365	Angiosperm	1	Camp	1	Hunt and Lucas 1992, Robison et al., 1982; Tidwell et al., 1981; Knowlton, 1916	5	NULL	Kirtland	10	45.0628	-81.1463	45.1312	-83.0028	44.1723	-85.38	36.2832	-108.255	74.3	0.9	75	coastal plain	4	4. coastal plain	NULL
	Magnoliopsida	6	Lamiales	30	Oleaceae	65	Phyllites neomexicanus	172	374	Angiosperm	1	Camp	1	Hunt and Lucas 1992, Robison et al., 1982; Tidwell et al., 1981; Knowlton, 1916	5	NULL	Fruitland	7	45.2956	-81.1381	45.3639	-82.998	44.4051	-85.3784	36.51	-108.32	75.65	0.45	75	unknown	0	0. unknown	NULL
	Magnoliopsida	6	Lamiales	30	Oleaceae	65	Phyllites petiolatus	172	375	Angiosperm	1	Camp	1	Hunt and Lucas 1992, Robison et al., 1982; Tidwell et al., 1981; Knowlton, 1916	5	NULL	Fruitland	7	45.2956	-81.1381	45.3639	-82.998	44.4051	-85.3784	36.51	-108.32	75.65	0.45	75	unknown	0	0. unknown	NULL
	Liliopsida	4	Alismatales	1	Araceae	7	Pistia corrugata	180	384	Angiosperm	1	Camp	1	Hunt and Lucas 1992, Robison et al., 1982; Tidwell et al., 1981; Knowlton, 1916	5	NULL	Kirtland	10	45.0628	-81.1463	45.1312	-83.0028	44.1723	-85.38	36.2832	-108.255	74.3	0.9	75	estuarine, aquatic	7	7. estuarine, aquatic	NULL
	Magnoliopsida	6	Proteales	47	Platanaceae	72	Platanus nobilis	184	418	Angiosperm	1	Camp	1	Hunt and Lucas 1992, Robison et al., 1982; Tidwell et al., 1981; Knowlton, 1916	5	NULL	Kirtland	10	45.0628	-81.1463	45.1312	-83.0028	44.1723	-85.38	36.2832	-108.255	74.3	0.9	75	temperate lowland forest	2	2. temperate lowland forest	NULL
	Magnoliopsida	6	Proteales	47	Platanaceae	72	Platanus raynoldsii	184	420	Angiosperm	1	Camp	1	Hunt and Lucas 1992, Robison et al., 1982; Tidwell et al., 1981; Knowlton, 1916	5	NULL	Kirtland	10	45.0628	-81.1463	45.1312	-83.0028	44.1723	-85.38	36.2832	-108.255	74.3	0.9	75	temperate lowland forest	2	2. temperate lowland forest	NULL
	Pinopsida	9	Pinales	42	Podocarpaceae	74	Podozamites sp.	188	425	Gymnosperm	3	Camp	1	Hunt and Lucas 1992, Robison et al., 1982; Tidwell et al., 1981; Knowlton, 1916	5	NULL	Kirtland	10	45.0628	-81.1463	45.1312	-83.0028	44.1723	-85.38	36.2832	-108.255	74.3	0.9	75	temperate lowland forest	2	2. temperate lowland forest	NULL
	Magnoliopsida	6	Malvales	37	Malvaceae	57	Pterospermites sp.	195	448	Angiosperm	1	Camp	1	Hunt and Lucas 1992, Robison et al., 1982; Tidwell et al., 1981; Knowlton, 1916	5	NULL	Kirtland	10	45.0628	-81.1463	45.1312	-83.0028	44.1723	-85.38	36.2832	-108.255	74.3	0.9	75	tropical lowland forest	6	6. tropical lowland forest	NULL
	Magnoliopsida	6	Malvales	37	Malvaceae	57	Pterospermites undulatus	195	449	Angiosperm	1	Camp	1	Hunt and Lucas 1992, Robison et al., 1982; Tidwell et al., 1981; Knowlton, 1916	5	NULL	Fruitland	7	45.2956	-81.1381	45.3639	-82.998	44.4051	-85.3784	36.51	-108.32	75.65	0.45	75	tropical lowland forest	6	6. tropical lowland forest	NULL
	Magnoliopsida	6	Fagales	22	Fagaceae	39	Quercophyllum sp.	196	451	Angiosperm	1	Camp	1	Hunt and Lucas 1992, Robison et al., 1982; Tidwell et al., 1981; Knowlton, 1916	5	NULL	Kirtland	10	45.0628	-81.1463	45.1312	-83.0028	44.1723	-85.38	36.2832	-108.255	74.3	0.9	75	temperate lowland forest	2	2. temperate lowland forest	NULL
	Magnoliopsida	6	Fagales	22	Fagaceae	39	Quercus baueri	197	452	Angiosperm	1	Camp	1	Hunt and Lucas 1992, Robison et al., 1982; Tidwell et al., 1981; Knowlton, 1916	5	NULL	Fruitland	7	45.2956	-81.1381	45.3639	-82.998	44.4051	-85.3784	36.51	-108.32	75.65	0.45	75	temperate lowland forest	2	2. temperate lowland forest	NULL
	Magnoliopsida	6	Rosales	51	Rhamnaceae	81	Rhamnus goldianus	205	468	Angiosperm	1	Camp	1	Hunt and Lucas 1992, Robison et al., 1982; Tidwell et al., 1981; Knowlton, 1916	5	NULL	Fruitland	7	45.2956	-81.1381	45.3639	-82.998	44.4051	-85.3784	36.51	-108.32	75.65	0.45	75	temperate lowland forest	2	2. temperate lowland forest	NULL
	Magnoliopsida	6	Rosales	51	Rhamnaceae	81	Rhamnus goldianus	205	468	Angiosperm	1	Camp	1	Hunt and Lucas 1992, Robison et al., 1982; Tidwell et al., 1981; Knowlton, 1916	5	NULL	Kirtland	10	45.0628	-81.1463	45.1312	-83.0028	44.1723	-85.38	36.2832	-108.255	74.3	0.9	75	temperate lowland forest	2	2. temperate lowland forest	NULL
	Magnoliopsida	6	Rosales	51	Rhamnaceae	81	Rhamnus minutus	205	469	Angiosperm	1	Camp	1	Hunt and Lucas 1992, Robison et al., 1982; Tidwell et al., 1981; Knowlton, 1916	5	NULL	Kirtland	10	45.0628	-81.1463	45.1312	-83.0028	44.1723	-85.38	36.2832	-108.255	74.3	0.9	75	temperate lowland forest	2	2. temperate lowland forest	NULL
	Liliopsida	4	Arecales	3	Arecaceae	9	Rhizopalmoxylon sp.	206	472	Angiosperm	1	Camp	1	Hunt and Lucas 1992, Robison et al., 1982; Tidwell et al., 1981; Knowlton, 1916	5	NULL	Kirtland	10	45.0628	-81.1463	45.1312	-83.0028	44.1723	-85.38	36.2832	-108.255	74.3	0.9	75	swampy, lagoonal	3	3. swampy, lagoonal	NULL
	Magnoliopsida	6	Saxifragales	55	Grossulariaceae	45	Ribes neomexicana	208	474	Angiosperm	1	Camp	1	Hunt and Lucas 1992, Robison et al., 1982; Tidwell et al., 1981; Knowlton, 1916	5	NULL	Fruitland	7	45.2956	-81.1381	45.3639	-82.998	44.4051	-85.3784	36.51	-108.32	75.65	0.45	75	temperate lowland forest	2	2. temperate lowland forest	NULL
	Liliopsida	4	Arecales	3	Arecaceae	9	Sabalites imperialis	211	491	Angiosperm	1	Camp	1	Hunt and Lucas 1992, Robison et al., 1982; Tidwell et al., 1981; Knowlton, 1916	5	NULL	Fruitland	7	45.2956	-81.1381	45.3639	-82.998	44.4051	-85.3784	36.51	-108.32	75.65	0.45	75	swampy, lagoonal	3	3. swampy, lagoonal	NULL
	Liliopsida	4	Arecales	3	Arecaceae	9	Sabalites montana	211	492	Angiosperm	1	Camp	1	Hunt and Lucas 1992, Robison et al., 1982; Tidwell et al., 1981; Knowlton, 1916	5	NULL	Fruitland	7	45.2956	-81.1381	45.3639	-82.998	44.4051	-85.3784	36.51	-108.32	75.65	0.45	75	swampy, lagoonal	3	3. swampy, lagoonal	NULL
	Liliopsida	4	Arecales	3	Arecaceae	9	Sabalites sp.	211	493	Angiosperm	1	Camp	1	Hunt and Lucas 1992, Robison et al., 1982; Tidwell et al., 1981; Knowlton, 1916	5	NULL	Fruitland	7	45.2956	-81.1381	45.3639	-82.998	44.4051	-85.3784	36.51	-108.32	75.65	0.45	75	swampy, lagoonal	3	3. swampy, lagoonal	NULL
	Magnoliopsida	6	Malpighiales	36	Salicaceae	84	Salix baueri	214	497	Angiosperm	1	Camp	1	Hunt and Lucas 1992, Robison et al., 1982; Tidwell et al., 1981; Knowlton, 1916	5	NULL	Fruitland	7	45.2956	-81.1381	45.3639	-82.998	44.4051	-85.3784	36.51	-108.32	75.65	0.45	75	temperate lowland forest	2	2. temperate lowland forest	NULL
	Magnoliopsida	6	Malpighiales	36	Salicaceae	84	Salix lancensis	214	498	Angiosperm	1	Camp	1	Hunt and Lucas 1992, Robison et al., 1982; Tidwell et al., 1981; Knowlton, 1916	5	NULL	Kirtland	10	45.0628	-81.1463	45.1312	-83.0028	44.1723	-85.38	36.2832	-108.255	74.3	0.9	75	temperate lowland forest	2	2. temperate lowland forest	NULL
	Magnoliopsida	6	Malpighiales	36	Salicaceae	84	Salix sp.	214	502	Angiosperm	1	Camp	1	Hunt and Lucas 1992, Robison et al., 1982; Tidwell et al., 1981; Knowlton, 1916	5	NULL	Fruitland	7	45.2956	-81.1381	45.3639	-82.998	44.4051	-85.3784	36.51	-108.32	75.65	0.45	75	temperate lowland forest	2	2. temperate lowland forest	NULL
	Polypodiopsida	10	Salviniales	53	Salviniaceae	85	Salvinia sp.	215	504	Fern/Moss	2	Camp	1	Hunt and Lucas 1992, Robison et al., 1982; Tidwell et al., 1981; Knowlton, 1916	5	NULL	Kirtland	10	45.0628	-81.1463	45.1312	-83.0028	44.1723	-85.38	36.2832	-108.255	74.3	0.9	75	estuarine, aquatic	7	7. estuarine, aquatic	NULL
	Pinopsida	9	Pinales	42	Cupressaceae	24	Sequoia cuneata	225	520	Gymnosperm	3	Camp	1	Hunt and Lucas 1992, Robison et al., 1982; Tidwell et al., 1981; Knowlton, 1916	5	NULL	Fruitland	7	45.2956	-81.1381	45.3639	-82.998	44.4051	-85.3784	36.51	-108.32	75.65	0.45	75	temperate lowland forest	2	2. temperate lowland forest	NULL
	Pinopsida	9	Pinales	42	Cupressaceae	24	Sequoia cuneata	225	520	Gymnosperm	3	Camp	1	Hunt and Lucas 1992, Robison et al., 1982; Tidwell et al., 1981; Knowlton, 1916	5	NULL	Kirtland	10	45.0628	-81.1463	45.1312	-83.0028	44.1723	-85.38	36.2832	-108.255	74.3	0.9	75	temperate lowland forest	2	2. temperate lowland forest	NULL
	Pinopsida	9	Pinales	42	Cupressaceae	24	Sequoia obovata	225	525	Gymnosperm	3	Camp	1	Hunt and Lucas 1992, Robison et al., 1982; Tidwell et al., 1981; Knowlton, 1916	5	NULL	Fruitland	7	45.2956	-81.1381	45.3639	-82.998	44.4051	-85.3784	36.51	-108.32	75.65	0.45	75	temperate lowland forest	2	2. temperate lowland forest	NULL
	Pinopsida	9	Pinales	42	Cupressaceae	24	Sequoia reichenbachi	225	526	Gymnosperm	3	Camp	1	Hunt and Lucas 1992, Robison et al., 1982; Tidwell et al., 1981; Knowlton, 1916	5	NULL	Fruitland	7	45.2956	-81.1381	45.3639	-82.998	44.4051	-85.3784	36.51	-108.32	75.65	0.45	75	temperate lowland forest	2	2. temperate lowland forest	NULL
	Liliopsida	4	Poales	45	Typhaceae	92	Sparganium sp.	228	530	Angiosperm	1	Camp	1	Hunt and Lucas 1992, Robison et al., 1982; Tidwell et al., 1981; Knowlton, 1916	5	NULL	Kirtland	10	45.0628	-81.1463	45.1312	-83.0028	44.1723	-85.38	36.2832	-108.255	74.3	0.9	75	wet, successional	5	5. wet, successional	NULL
	Magnoliopsida	6	Dipsacales	17	Adoxaceae	2	Viburnum antiquum	243	556	Angiosperm	1	Camp	1	Hunt and Lucas 1992, Robison et al., 1982; Tidwell et al., 1981; Knowlton, 1916	5	NULL	Kirtland	10	45.0628	-81.1463	45.1312	-83.0028	44.1723	-85.38	36.2832	-108.255	74.3	0.9	75	temperate lowland forest	2	2. temperate lowland forest	NULL
	Magnoliopsida	6	Vitales	61	Vitaceae	96	Vitis lobata	244	566	Angiosperm	1	Camp	1	Hunt and Lucas 1992, Robison et al., 1982; Tidwell et al., 1981; Knowlton, 1916	5	NULL	Kirtland	10	45.0628	-81.1463	45.1312	-83.0028	44.1723	-85.38	36.2832	-108.255	74.3	0.9	75	temperate lowland forest	2	2. temperate lowland forest	NULL
	Polypodiopsida	10	Polypodiales	46	Blechnaceae	15	Woodwarthia crenata	250	575	Fern/Moss	2	Camp	1	Hunt and Lucas 1992, Robison et al., 1982; Tidwell et al., 1981; Knowlton, 1916	5	NULL	Kirtland	10	45.0628	-81.1463	45.1312	-83.0028	44.1723	-85.38	36.2832	-108.255	74.3	0.9	75	unknown	0	0. unknown	NULL
	Magnoliopsida	6	Rosales	51	Rhamnaceae	81	Zizyphus sp.	257	585	Angiosperm	1	Camp	1	Hunt and Lucas 1992, Robison et al., 1982; Tidwell et al., 1981; Knowlton, 1916	5	NULL	Fruitland	7	45.2956	-81.1381	45.3639	-82.998	44.4051	-85.3784	36.51	-108.32	75.65	0.45	75	tropical lowland forest	6	6. tropical lowland forest	NULL
	Magnoliopsida	6	Rosales	51	Rhamnaceae	81	Zizyphus sp.	257	585	Angiosperm	1	Camp	1	Hunt and Lucas 1992, Robison et al., 1982; Tidwell et al., 1981; Knowlton, 1916	5	NULL	Kirtland	10	45.0628	-81.1463	45.1312	-83.0028	44.1723	-85.38	36.2832	-108.255	74.3	0.9	75	tropical lowland forest	6	6. tropical lowland forest	NULL
	Pinopsida	9	Pinales	42	Cupressaceae	24	Geinitzia formosa	98	220	Gymnosperm	3	Camp	1	Knowlton, 1900	9	NULL	Eagle	4	49.6225	-74.9757	49.7489	-77.0423	48.8509	-79.7761	41.6856	-105.738	78.15	2.35	80	coastal plain	4	4. coastal plain	Harper's Station/Dunn's Ranch
	Pinopsida	9	Pinales	42	Araucariaceae	8	Brachyphyllum macrocarpum	31	45	Gymnosperm	3	Camp	1	Knowlton, 1900	9	NULL	Eagle	4	49.6225	-74.9757	49.7489	-77.0423	48.8509	-79.7761	41.6856	-105.738	78.15	2.35	80	coastal plain	4	4. coastal plain	Harper's Station/Dunn's Ranch
	Magnoliopsida	6	Malpighiales	36	Salicaceae	84	Populus obovata	189	437	Angiosperm	1	Camp	1	Knowlton, 1900	9	NULL	Eagle	4	49.6225	-74.9757	49.7489	-77.0423	48.8509	-79.7761	41.6856	-105.738	78.15	2.35	80	wet, successional	5	5. wet, successional	Harper's Station/Dunn's Ranch
	Magnoliopsida	6	Ranunculales	48	Menispermaceae	60	Menispermites knightii	141	318	Angiosperm	1	Camp	1	Knowlton, 1900	9	NULL	Eagle	4	49.6225	-74.9757	49.7489	-77.0423	48.8509	-79.7761	41.6856	-105.738	78.15	2.35	80	tropical lowland forest	6	6. tropical lowland forest	Harper's Station/Dunn's Ranch
	Pinopsida	9	Pinales	42	Pinaceae	70	Pinus quenstedti	177	382	Gymnosperm	3	Camp	1	Knowlton, 1900	9	NULL	Eagle	4	49.6225	-74.9757	49.7489	-77.0423	48.8509	-79.7761	41.6856	-105.738	78.15	2.35	80	temperate lowland forest	2	2. temperate lowland forest	Harper's Station/Dunn's Ranch
	Magnoliopsida	6	Fagales	22	Myricaceae	62	Myrica torreyi	148	331	Angiosperm	1	Camp	1	Knowlton, 1900	9	NULL	Eagle	4	49.6225	-74.9757	49.7489	-77.0423	48.8509	-79.7761	41.6856	-105.738	78.15	2.35	80	wet, successional	5	5. wet, successional	Harper's Station/Dunn's Ranch
	Magnoliopsida	6	Fagales	22	Fagaceae	39	Quercus lesquereuziana	197	455	Angiosperm	1	Camp	1	Knowlton, 1900	9	NULL	Eagle	4	49.6225	-74.9757	49.7489	-77.0423	48.8509	-79.7761	41.6856	-105.738	78.15	2.35	80	temperate lowland forest	2	2. temperate lowland forest	Harper's Station/Dunn's Ranch
	Polypodiopsida	10	Polypodiales	46	Aspleniaceae	11	Asplenium wyomingensis	24	37	Fern/Moss	2	Camp	1	Knowlton, 1900	9	NULL	Eagle	4	49.5875	-75.4312	49.7103	-77.4983	48.8081	-80.223	41.5657	-106.102	78.15	2.35	80	tropical lowland forest	6	6. tropical lowland forest	North of Dutton Creek
	Polypodiopsida	10	Polypodiales	46	Aspleniaceae	11	Asplenium tenellum	24	36	Fern/Moss	2	Camp	1	Knowlton, 1900	9	NULL	Eagle	4	49.5875	-75.4312	49.7103	-77.4983	48.8081	-80.223	41.5657	-106.102	78.15	2.35	80	tropical lowland forest	6	6. tropical lowland forest	North of Dutton Creek
	Polypodiopsida	10	Polypodiales	46	Aspleniaceae	11	Asplenium sp.	24	35	Fern/Moss	2	Camp	1	Knowlton, 1900	9	NULL	Eagle	4	49.5875	-75.4312	49.7103	-77.4983	48.8081	-80.223	41.5657	-106.102	78.15	2.35	80	tropical lowland forest	6	6. tropical lowland forest	North of Dutton Creek
	Polypodiopsida	10	Polypodiales	46	Blechnaceae	15	Woodwardia sp.	249	574	Fern/Moss	2	Camp	1	Knowlton, 1900	9	NULL	Eagle	4	49.5875	-75.4312	49.7103	-77.4983	48.8081	-80.223	41.5657	-106.102	78.15	2.35	80	temperate lowland forest	2	2. temperate lowland forest	North of Dutton Creek
	Pinopsida	9	Pinales	42	Cupressaceae	24	Cunninghamites sp.	62	114	Gymnosperm	3	Camp	1	Knowlton, 1900	9	NULL	Eagle	4	49.5875	-75.4312	49.7103	-77.4983	48.8081	-80.223	41.5657	-106.102	78.15	2.35	80	temperate lowland forest	2	2. temperate lowland forest	North of Dutton Creek
	Pinopsida	9	Pinales	42	Araucariaceae	8	Brachyphyllum macrocarpum	31	45	Gymnosperm	3	Camp	1	Knowlton, 1900	9	NULL	Eagle	4	49.5875	-75.4312	49.7103	-77.4983	48.8081	-80.223	41.5657	-106.102	78.15	2.35	80	coastal plain	4	4. coastal plain	North of Dutton Creek
	Pinopsida	9	Pinales	42	Cupressaceae	24	Glyptostrobus sp.	102	231	Gymnosperm	3	Camp	1	Knowlton, 1900	9	NULL	Eagle	4	49.5875	-75.4312	49.7103	-77.4983	48.8081	-80.223	41.5657	-106.102	78.15	2.35	80	swampy, lagoonal	3	3. swampy, lagoonal	North of Dutton Creek
	Magnoliopsida	6	Fagales	22	Myricaceae	62	Myrica sp.	148	330	Angiosperm	1	Camp	1	Knowlton, 1900	9	NULL	Eagle	4	49.5875	-75.4312	49.7103	-77.4983	48.8081	-80.223	41.5657	-106.102	78.15	2.35	80	wet, successional	5	5. wet, successional	North of Dutton Creek
	Magnoliopsida	6	Malpighiales	36	Salicaceae	84	Populus sp.	189	438	Angiosperm	1	Camp	1	Knowlton, 1900	9	NULL	Eagle	4	49.5875	-75.4312	49.7103	-77.4983	48.8081	-80.223	41.5657	-106.102	78.15	2.35	80	wet, successional	5	5. wet, successional	North of Dutton Creek
	Magnoliopsida	6	Rosales	51	Moraceae	61	Ficus hesperia	92	181	Angiosperm	1	Camp	1	Knowlton, 1900	9	NULL	Eagle	4	49.5875	-75.4312	49.7103	-77.4983	48.8081	-80.223	41.5657	-106.102	78.15	2.35	80	tropical lowland forest	6	6. tropical lowland forest	North of Dutton Creek
	Magnoliopsida	6	Nymphaeales	40	Nymphaeaceae	64	Castalia duttoniana	37	60	Angiosperm	1	Camp	1	Knowlton, 1900	9	NULL	Eagle	4	49.5875	-75.4312	49.7103	-77.4983	48.8081	-80.223	41.5657	-106.102	78.15	2.35	80	estuarine, aquatic	7	7. estuarine, aquatic	North of Dutton Creek
	Magnoliopsida	6	Magnoliales	34	Annonaceae	5	Asimina eocenica	21	29	Angiosperm	1	Camp	1	Knowlton, 1900	9	NULL	Eagle	4	49.5875	-75.4312	49.7103	-77.4983	48.8081	-80.223	41.5657	-106.102	78.15	2.35	80	tropical lowland forest	6	6. tropical lowland forest	North of Dutton Creek
	Magnoliopsida	6	Lamiales	30	Oleaceae	65	Phyllites sp.	172	376	Angiosperm	1	Camp	1	Knowlton, 1900	9	NULL	Eagle	4	49.5875	-75.4312	49.7103	-77.4983	48.8081	-80.223	41.5657	-106.102	78.15	2.35	80	unknown	0	0. unknown	North of Dutton Creek
	Magnoliopsida	6	Fagales	22	Myricaceae	62	Myrica torreyi	148	331	Angiosperm	1	Camp	1	Knowlton, 1900	9	NULL	Eagle	4	50.2623	-79.7108	50.3406	-81.6479	49.3909	-84.1286	41.5543	-108.803	78.15	2.35	80	wet, successional	5	5. wet, successional	Black Buttes Station
	Magnoliopsida	6	Rosales	51	Moraceae	61	Ficus asarifolia	92	175	Angiosperm	1	Camp	1	Knowlton, 1900	9	NULL	Eagle	4	50.2623	-79.7108	50.3406	-81.6479	49.3909	-84.1286	41.5543	-108.803	78.15	2.35	80	tropical lowland forest	6	6. tropical lowland forest	Black Buttes Station
	Magnoliopsida	6	Rosales	51	Moraceae	61	Ficus irregularis	92	184	Angiosperm	1	Camp	1	Knowlton, 1900	9	NULL	Eagle	4	50.2623	-79.7108	50.3406	-81.6479	49.3909	-84.1286	41.5543	-108.803	78.15	2.35	80	tropical lowland forest	6	6. tropical lowland forest	Black Buttes Station
	Magnoliopsida	6	Magnoliales	34	Magnoliaceae	55	Magnolia tenuinervis	127	294	Angiosperm	1	Camp	1	Knowlton, 1900	9	NULL	Eagle	4	50.2623	-79.7108	50.3406	-81.6479	49.3909	-84.1286	41.5543	-108.803	78.15	2.35	80	tropical lowland forest	6	6. tropical lowland forest	Black Buttes Station
	Magnoliopsida	6	Magnoliales	34	Annonaceae	5	Asimina eocenica	21	29	Angiosperm	1	Camp	1	Knowlton, 1900	9	NULL	Eagle	4	50.2623	-79.7108	50.3406	-81.6479	49.3909	-84.1286	41.5543	-108.803	78.15	2.35	80	tropical lowland forest	6	6. tropical lowland forest	Black Buttes Station
	Magnoliopsida	6	Fabales	21	Fabaceae	38	Podogonium americanum	187	424	Angiosperm	1	Camp	1	Knowlton, 1900	9	NULL	Eagle	4	50.2623	-79.7108	50.3406	-81.6479	49.3909	-84.1286	41.5543	-108.803	78.15	2.35	80	temperate lowland forest	2	2. temperate lowland forest	Black Buttes Station
	Magnoliopsida	6	Malvales	37	Malvaceae	57	Pterospermites wardii	195	450	Angiosperm	1	Camp	1	Knowlton, 1900	9	NULL	Eagle	4	50.2623	-79.7108	50.3406	-81.6479	49.3909	-84.1286	41.5543	-108.803	78.15	2.35	80	tropical lowland forest	6	6. tropical lowland forest	Black Buttes Station
	Magnoliopsida	6	Rosales	51	Rhamnaceae	81	Rhamnus salicifolius	205	470	Angiosperm	1	Camp	1	Knowlton, 1900	9	NULL	Eagle	4	50.2623	-79.7108	50.3406	-81.6479	49.3909	-84.1286	41.5543	-108.803	78.15	2.35	80	temperate lowland forest	2	2. temperate lowland forest	Black Buttes Station
	Magnoliopsida	6	Dipsacales	17	Adoxaceae	2	Viburnum whymperi	243	565	Angiosperm	1	Camp	1	Knowlton, 1900	9	NULL	Eagle	4	50.2623	-79.7108	50.3406	-81.6479	49.3909	-84.1286	41.5543	-108.803	78.15	2.35	80	temperate lowland forest	2	2. temperate lowland forest	Black Buttes Station
	Polypodiopsida	10	Schizaeales	56	Schizaeaceae	88	Anemia subcretacea	8	12	Fern/Moss	2	Camp	1	Knowlton, 1900	9	NULL	Eagle	4	50.3808	-79.6336	50.4596	-81.5727	49.5105	-84.0569	41.6817	-108.783	78.15	2.35	80	tropical lowland forest	6	6. tropical lowland forest	Point of Rocks
	Polypodiopsida	10	Polypodiales	46	Blechnaceae	15	Woodwardia crenata	249	572	Fern/Moss	2	Camp	1	Knowlton, 1900	9	NULL	Eagle	4	50.3808	-79.6336	50.4596	-81.5727	49.5105	-84.0569	41.6817	-108.783	78.15	2.35	80	temperate lowland forest	2	2. temperate lowland forest	Point of Rocks
	Polypodiopsida	10	Salviniales	53	Marseleaceae	59	Marsilea attenuata	139	315	Fern/Moss	2	Camp	1	Knowlton, 1900	9	NULL	Eagle	4	50.3808	-79.6336	50.4596	-81.5727	49.5105	-84.0569	41.6817	-108.783	78.15	2.35	80	estuarine, aquatic	7	7. estuarine, aquatic	Point of Rocks
	Lycopodiopsida	5	Lycopodiales	33	Lycopodiaceae	53	Lycopodium lesquereuxiana	124	287	Fern/Moss	2	Camp	1	Knowlton, 1900	9	NULL	Eagle	4	50.3808	-79.6336	50.4596	-81.5727	49.5105	-84.0569	41.6817	-108.783	78.15	2.35	80	upland forest	1	1. upland forest	Point of Rocks
	Lycopodiopsida	5	Selaginellales	57	Selaginellaceae	89	Selaginella laciniata	223	517	Fern/Moss	2	Camp	1	Knowlton, 1900	9	NULL	Eagle	4	50.3808	-79.6336	50.4596	-81.5727	49.5105	-84.0569	41.6817	-108.783	78.15	2.35	80	tropical lowland forest	6	6. tropical lowland forest	Point of Rocks
	Lycopodiopsida	5	Selaginellales	57	Selaginellaceae	89	Selaginella falcata	223	516	Fern/Moss	2	Camp	1	Knowlton, 1900	9	NULL	Eagle	4	50.3808	-79.6336	50.4596	-81.5727	49.5105	-84.0569	41.6817	-108.783	78.15	2.35	80	tropical lowland forest	6	6. tropical lowland forest	Point of Rocks
	Pinopsida	9	Pinales	42	Cupressaceae	24	Sequoia brevifolia	225	519	Gymnosperm	3	Camp	1	Knowlton, 1900	9	NULL	Eagle	4	50.3808	-79.6336	50.4596	-81.5727	49.5105	-84.0569	41.6817	-108.783	78.15	2.35	80	temperate lowland forest	2	2. temperate lowland forest	Point of Rocks
	Pinopsida	9	Pinales	42	Cupressaceae	24	Geinitzia longifolia	98	221	Gymnosperm	3	Camp	1	Knowlton, 1900	9	NULL	Eagle	4	50.3808	-79.6336	50.4596	-81.5727	49.5105	-84.0569	41.6817	-108.783	78.15	2.35	80	coastal plain	4	4. coastal plain	Point of Rocks
	Pinopsida	9	Pinales	42	Cupressaceae	24	Geinitzia biformis	98	219	Gymnosperm	3	Camp	1	Knowlton, 1900	9	NULL	Eagle	4	50.3808	-79.6336	50.4596	-81.5727	49.5105	-84.0569	41.6817	-108.783	78.15	2.35	80	coastal plain	4	4. coastal plain	Point of Rocks
	Pinopsida	9	Pinales	42	Cupressaceae	24	Widdringtonia complanata	246	569	Gymnosperm	3	Camp	1	Knowlton, 1900	9	NULL	Eagle	4	50.3808	-79.6336	50.4596	-81.5727	49.5105	-84.0569	41.6817	-108.783	78.15	2.35	80	upland forest	1	1. upland forest	Point of Rocks
	Ginkgoopsida	3	Ginkgoales	26	Ginkgoaceae	42	Ginkgo laramiensis	100	224	Gymnosperm	3	Camp	1	Knowlton, 1900	9	NULL	Eagle	4	50.3808	-79.6336	50.4596	-81.5727	49.5105	-84.0569	41.6817	-108.783	78.15	2.35	80	temperate lowland forest	2	2. temperate lowland forest	Point of Rocks
	Liliopsida	4	Alismatales	1	Araceae	7	Pistia corrugata	180	384	Angiosperm	1	Camp	1	Knowlton, 1900	9	NULL	Eagle	4	50.3808	-79.6336	50.4596	-81.5727	49.5105	-84.0569	41.6817	-108.783	78.15	2.35	80	estuarine, aquatic	7	7. estuarine, aquatic	Point of Rocks
	Liliopsida	4	Alismatales	1	Hydrocharitaceae	48	Ottelia americana	159	353	Angiosperm	1	Camp	1	Knowlton, 1900	9	NULL	Eagle	4	50.3808	-79.6336	50.4596	-81.5727	49.5105	-84.0569	41.6817	-108.783	78.15	2.35	80	estuarine, aquatic	7	7. estuarine, aquatic	Point of Rocks
	Liliopsida	4	Poales	45	Cyperaceae	27	Cyperacites	68	123	Angiosperm	1	Camp	1	Knowlton, 1900	9	NULL	Eagle	4	50.3808	-79.6336	50.4596	-81.5727	49.5105	-84.0569	41.6817	-108.783	78.15	2.35	80	wet, successional	5	5. wet, successional	Point of Rocks
	Liliopsida	4	Arecales	3	Arecaceae	9	Sabalites grayanus	211	490	Angiosperm	1	Camp	1	Knowlton, 1900	9	NULL	Eagle	4	50.3808	-79.6336	50.4596	-81.5727	49.5105	-84.0569	41.6817	-108.783	78.15	2.35	80	swampy, lagoonal	3	3. swampy, lagoonal	Point of Rocks
	Magnoliopsida	6	Fagales	22	Myricaceae	62	Myrica torreyi	148	331	Angiosperm	1	Camp	1	Knowlton, 1900	9	NULL	Eagle	4	50.3808	-79.6336	50.4596	-81.5727	49.5105	-84.0569	41.6817	-108.783	78.15	2.35	80	wet, successional	5	5. wet, successional	Point of Rocks
	Magnoliopsida	6	Malpighiales	36	Salicaceae	84	Populus melanarioides	189	433	Angiosperm	1	Camp	1	Knowlton, 1900	9	NULL	Eagle	4	50.3808	-79.6336	50.4596	-81.5727	49.5105	-84.0569	41.6817	-108.783	78.15	2.35	80	wet, successional	5	5. wet, successional	Point of Rocks
	Magnoliopsida	6	Malpighiales	36	Salicaceae	84	Populus wardii	189	439	Angiosperm	1	Camp	1	Knowlton, 1900	9	NULL	Eagle	4	50.3808	-79.6336	50.4596	-81.5727	49.5105	-84.0569	41.6817	-108.783	78.15	2.35	80	wet, successional	5	5. wet, successional	Point of Rocks
	Magnoliopsida	6	Malpighiales	36	Salicaceae	84	Populus mutabilis ovalis	189	434	Angiosperm	1	Camp	1	Knowlton, 1900	9	NULL	Eagle	4	50.3808	-79.6336	50.4596	-81.5727	49.5105	-84.0569	41.6817	-108.783	78.15	2.35	80	wet, successional	5	5. wet, successional	Point of Rocks
	Magnoliopsida	6	Malpighiales	36	Salicaceae	84	Salix angusta	214	496	Angiosperm	1	Camp	1	Knowlton, 1900	9	NULL	Eagle	4	50.3808	-79.6336	50.4596	-81.5727	49.5105	-84.0569	41.6817	-108.783	78.15	2.35	80	temperate lowland forest	2	2. temperate lowland forest	Point of Rocks
	Magnoliopsida	6	Fagales	22	Fagaceae	39	Quercus dentonoides	197	453	Angiosperm	1	Camp	1	Knowlton, 1900	9	NULL	Eagle	4	50.3808	-79.6336	50.4596	-81.5727	49.5105	-84.0569	41.6817	-108.783	78.15	2.35	80	temperate lowland forest	2	2. temperate lowland forest	Point of Rocks
	Magnoliopsida	6	Fagales	22	Fagaceae	39	Dryophyllum subfalcatum	81	163	Angiosperm	1	Camp	1	Knowlton, 1900	9	NULL	Eagle	4	50.3808	-79.6336	50.4596	-81.5727	49.5105	-84.0569	41.6817	-108.783	78.15	2.35	80	temperate lowland forest	2	2. temperate lowland forest	Point of Rocks
	Magnoliopsida	6	Fagales	22	Fagaceae	39	Dryophyllum falcatum	81	159	Angiosperm	1	Camp	1	Knowlton, 1900	9	NULL	Eagle	4	50.3808	-79.6336	50.4596	-81.5727	49.5105	-84.0569	41.6817	-108.783	78.15	2.35	80	temperate lowland forest	2	2. temperate lowland forest	Point of Rocks
	Magnoliopsida	6	Fagales	22	Fagaceae	39	Dryophyllum crenatum	81	158	Angiosperm	1	Camp	1	Knowlton, 1900	9	NULL	Eagle	4	50.3808	-79.6336	50.4596	-81.5727	49.5105	-84.0569	41.6817	-108.783	78.15	2.35	80	temperate lowland forest	2	2. temperate lowland forest	Point of Rocks
	Magnoliopsida	6	Rosales	51	Moraceae	61	Ficus trinervis	92	203	Angiosperm	1	Camp	1	Knowlton, 1900	9	NULL	Eagle	4	50.3808	-79.6336	50.4596	-81.5727	49.5105	-84.0569	41.6817	-108.783	78.15	2.35	80	tropical lowland forest	6	6. tropical lowland forest	Point of Rocks
	Magnoliopsida	6	Rosales	51	Moraceae	61	Ficus populoides	92	191	Angiosperm	1	Camp	1	Knowlton, 1900	9	NULL	Eagle	4	50.3808	-79.6336	50.4596	-81.5727	49.5105	-84.0569	41.6817	-108.783	78.15	2.35	80	tropical lowland forest	6	6. tropical lowland forest	Point of Rocks
	Magnoliopsida	6	Rosales	51	Moraceae	61	Ficus squarrosa	92	200	Angiosperm	1	Camp	1	Knowlton, 1900	9	NULL	Eagle	4	50.3808	-79.6336	50.4596	-81.5727	49.5105	-84.0569	41.6817	-108.783	78.15	2.35	80	tropical lowland forest	6	6. tropical lowland forest	Point of Rocks
	Magnoliopsida	6	Rosales	51	Moraceae	61	Ficus incompleta	92	183	Angiosperm	1	Camp	1	Knowlton, 1900	9	NULL	Eagle	4	50.3808	-79.6336	50.4596	-81.5727	49.5105	-84.0569	41.6817	-108.783	78.15	2.35	80	tropical lowland forest	6	6. tropical lowland forest	Point of Rocks
	Magnoliopsida	6	Rosales	51	Moraceae	61	Ficus problematica	92	194	Angiosperm	1	Camp	1	Knowlton, 1900	9	NULL	Eagle	4	50.3808	-79.6336	50.4596	-81.5727	49.5105	-84.0569	41.6817	-108.783	78.15	2.35	80	tropical lowland forest	6	6. tropical lowland forest	Point of Rocks
	Magnoliopsida	6	Rosales	51	Moraceae	61	Ficus rhamnoides	92	195	Angiosperm	1	Camp	1	Knowlton, 1900	9	NULL	Eagle	4	50.3808	-79.6336	50.4596	-81.5727	49.5105	-84.0569	41.6817	-108.783	78.15	2.35	80	tropical lowland forest	6	6. tropical lowland forest	Point of Rocks
	Magnoliopsida	6	Rosales	51	Moraceae	61	Ficus montana	92	188	Angiosperm	1	Camp	1	Knowlton, 1900	9	NULL	Eagle	4	50.3808	-79.6336	50.4596	-81.5727	49.5105	-84.0569	41.6817	-108.783	78.15	2.35	80	tropical lowland forest	6	6. tropical lowland forest	Point of Rocks
	Magnoliopsida	6	Rosales	51	Moraceae	61	Ficus wardii	92	204	Angiosperm	1	Camp	1	Knowlton, 1900	9	NULL	Eagle	4	50.3808	-79.6336	50.4596	-81.5727	49.5105	-84.0569	41.6817	-108.783	78.15	2.35	80	tropical lowland forest	6	6. tropical lowland forest	Point of Rocks
	Magnoliopsida	6	Rosales	51	Moraceae	61	Ficus asarifolia	92	175	Angiosperm	1	Camp	1	Knowlton, 1900	9	NULL	Eagle	4	50.3808	-79.6336	50.4596	-81.5727	49.5105	-84.0569	41.6817	-108.783	78.15	2.35	80	tropical lowland forest	6	6. tropical lowland forest	Point of Rocks
	Magnoliopsida	6	Rosales	51	Moraceae	61	Ficus dalmatica	92	180	Angiosperm	1	Camp	1	Knowlton, 1900	9	NULL	Eagle	4	50.3808	-79.6336	50.4596	-81.5727	49.5105	-84.0569	41.6817	-108.783	78.15	2.35	80	tropical lowland forest	6	6. tropical lowland forest	Point of Rocks
	Magnoliopsida	6	Rosales	51	Moraceae	61	Ficus irregularis	92	184	Angiosperm	1	Camp	1	Knowlton, 1900	9	NULL	Eagle	4	50.3808	-79.6336	50.4596	-81.5727	49.5105	-84.0569	41.6817	-108.783	78.15	2.35	80	tropical lowland forest	6	6. tropical lowland forest	Point of Rocks
	Magnoliopsida	6	Rosales	51	Moraceae	61	Ficus tillaefolia	92	202	Angiosperm	1	Camp	1	Knowlton, 1900	9	NULL	Eagle	4	50.3808	-79.6336	50.4596	-81.5727	49.5105	-84.0569	41.6817	-108.783	78.15	2.35	80	tropical lowland forest	6	6. tropical lowland forest	Point of Rocks
	Magnoliopsida	6	Rosales	51	Moraceae	61	Ficus planicostata	92	190	Angiosperm	1	Camp	1	Knowlton, 1900	9	NULL	Eagle	4	50.3808	-79.6336	50.4596	-81.5727	49.5105	-84.0569	41.6817	-108.783	78.15	2.35	80	tropical lowland forest	6	6. tropical lowland forest	Point of Rocks
	Magnoliopsida	6	Rosales	51	Moraceae	61	Ficus speciosissima	92	198	Angiosperm	1	Camp	1	Knowlton, 1900	9	NULL	Eagle	4	50.3808	-79.6336	50.4596	-81.5727	49.5105	-84.0569	41.6817	-108.783	78.15	2.35	80	tropical lowland forest	6	6. tropical lowland forest	Point of Rocks
	Magnoliopsida	6	Proteales	47	Nelumbonaceae	63	Nelumbo intermedia	153	339	Angiosperm	1	Camp	1	Knowlton, 1900	9	NULL	Eagle	4	50.3808	-79.6336	50.4596	-81.5727	49.5105	-84.0569	41.6817	-108.783	78.15	2.35	80	estuarine, aquatic	7	7. estuarine, aquatic	Point of Rocks
	Magnoliopsida	6	Proteales	47	Nelumbonaceae	63	Nelumbo sp.	153	340	Angiosperm	1	Camp	1	Knowlton, 1900	9	NULL	Eagle	4	50.3808	-79.6336	50.4596	-81.5727	49.5105	-84.0569	41.6817	-108.783	78.15	2.35	80	estuarine, aquatic	7	7. estuarine, aquatic	Point of Rocks
	Magnoliopsida	6	Magnoliales	34	Magnoliaceae	55	Magnolia pulchra	127	292	Angiosperm	1	Camp	1	Knowlton, 1900	9	NULL	Eagle	4	50.3808	-79.6336	50.4596	-81.5727	49.5105	-84.0569	41.6817	-108.783	78.15	2.35	80	tropical lowland forest	6	6. tropical lowland forest	Point of Rocks
	Magnoliopsida	6	Magnoliales	34	Magnoliaceae?	56	Liriodendron laramiense	123	284	Angiosperm	1	Camp	1	Knowlton, 1900	9	NULL	Eagle	4	50.3808	-79.6336	50.4596	-81.5727	49.5105	-84.0569	41.6817	-108.783	78.15	2.35	80	coastal plain	4	4. coastal plain	Point of Rocks
	Magnoliopsida	6	Laurales	31	Lauraceae	51	Malapoenna macrophylloides	133	306	Angiosperm	1	Camp	1	Knowlton, 1900	9	NULL	Eagle	4	50.3808	-79.6336	50.4596	-81.5727	49.5105	-84.0569	41.6817	-108.783	78.15	2.35	80	tropical lowland forest	6	6. tropical lowland forest	Point of Rocks
	Magnoliopsida	6	Laurales	31	Lauraceae	51	Laurus primigenia	116	276	Angiosperm	1	Camp	1	Knowlton, 1900	9	NULL	Eagle	4	50.3808	-79.6336	50.4596	-81.5727	49.5105	-84.0569	41.6817	-108.783	78.15	2.35	80	coastal plain	4	4. coastal plain	Point of Rocks
	Magnoliopsida	6	Laurales	31	Lauraceae	51	Laurus praestans	116	275	Angiosperm	1	Camp	1	Knowlton, 1900	9	NULL	Eagle	4	50.3808	-79.6336	50.4596	-81.5727	49.5105	-84.0569	41.6817	-108.783	78.15	2.35	80	coastal plain	4	4. coastal plain	Point of Rocks
	Magnoliopsida	6	Sapindales	54	Anacardiaceae	4	Rhus membranacea	207	473	Angiosperm	1	Camp	1	Knowlton, 1900	9	NULL	Eagle	4	50.3808	-79.6336	50.4596	-81.5727	49.5105	-84.0569	41.6817	-108.783	78.15	2.35	80	temperate lowland forest	2	2. temperate lowland forest	Point of Rocks
	Magnoliopsida	6	Proteales	47	Platanaceae	72	Grewiopsis cleburni	103	232	Angiosperm	1	Camp	1	Knowlton, 1900	9	NULL	Eagle	4	50.3808	-79.6336	50.4596	-81.5727	49.5105	-84.0569	41.6817	-108.783	78.15	2.35	80	temperate lowland forest	2	2. temperate lowland forest	Point of Rocks
	Magnoliopsida	6	Myrtales	39	Lythraceae	54	Trapa microphylla	235	542	Angiosperm	1	Camp	1	Knowlton, 1900	9	NULL	Eagle	4	50.3808	-79.6336	50.4596	-81.5727	49.5105	-84.0569	41.6817	-108.783	78.15	2.35	80	estuarine, aquatic	7	7. estuarine, aquatic	Point of Rocks
	Magnoliopsida	6	Myrtales	39	Lythraceae	54	Trapa cuneata	235	541	Angiosperm	1	Camp	1	Knowlton, 1900	9	NULL	Eagle	4	50.3808	-79.6336	50.4596	-81.5727	49.5105	-84.0569	41.6817	-108.783	78.15	2.35	80	estuarine, aquatic	7	7. estuarine, aquatic	Point of Rocks
	Magnoliopsida	6	Fabales	21	Fabaceae	38	Podogonium americanum	187	424	Angiosperm	1	Camp	1	Knowlton, 1900	9	NULL	Eagle	4	50.3808	-79.6336	50.4596	-81.5727	49.5105	-84.0569	41.6817	-108.783	78.15	2.35	80	temperate lowland forest	2	2. temperate lowland forest	Point of Rocks
	Magnoliopsida	6	Malvales	37	Malvaceae	57	Pterospermites wardii	195	450	Angiosperm	1	Camp	1	Knowlton, 1900	9	NULL	Eagle	4	50.3808	-79.6336	50.4596	-81.5727	49.5105	-84.0569	41.6817	-108.783	78.15	2.35	80	tropical lowland forest	6	6. tropical lowland forest	Point of Rocks
	Magnoliopsida	6	Malvales	37	Malvaceae	57	Pterospermites undulatus	195	449	Angiosperm	1	Camp	1	Knowlton, 1900	9	NULL	Eagle	4	50.3808	-79.6336	50.4596	-81.5727	49.5105	-84.0569	41.6817	-108.783	78.15	2.35	80	tropical lowland forest	6	6. tropical lowland forest	Point of Rocks
	Magnoliopsida	6	Cornales	11	Cornaceae	23	Cornus rhamnifolia	59	105	Angiosperm	1	Camp	1	Knowlton, 1900	9	NULL	Eagle	4	50.3808	-79.6336	50.4596	-81.5727	49.5105	-84.0569	41.6817	-108.783	78.15	2.35	80	temperate lowland forest	2	2. temperate lowland forest	Point of Rocks
	Magnoliopsida	6	Cornales	11	Cornaceae	23	Cornus impressa	59	103	Angiosperm	1	Camp	1	Knowlton, 1900	9	NULL	Eagle	4	50.3808	-79.6336	50.4596	-81.5727	49.5105	-84.0569	41.6817	-108.783	78.15	2.35	80	temperate lowland forest	2	2. temperate lowland forest	Point of Rocks
	Magnoliopsida	6	Cornales	11	Cornaceae	23	Cornus studeri	59	107	Angiosperm	1	Camp	1	Knowlton, 1900	9	NULL	Eagle	4	50.3808	-79.6336	50.4596	-81.5727	49.5105	-84.0569	41.6817	-108.783	78.15	2.35	80	temperate lowland forest	2	2. temperate lowland forest	Point of Rocks
	Magnoliopsida	6	Dipsacales	17	Adoxaceae	2	Viburnum anomalum	243	554	Angiosperm	1	Camp	1	Knowlton, 1900	9	NULL	Eagle	4	50.3808	-79.6336	50.4596	-81.5727	49.5105	-84.0569	41.6817	-108.783	78.15	2.35	80	temperate lowland forest	2	2. temperate lowland forest	Point of Rocks
	Magnoliopsida	6	Dipsacales	17	Adoxaceae	2	Viburnum whymperi	243	565	Angiosperm	1	Camp	1	Knowlton, 1900	9	NULL	Eagle	4	50.3808	-79.6336	50.4596	-81.5727	49.5105	-84.0569	41.6817	-108.783	78.15	2.35	80	temperate lowland forest	2	2. temperate lowland forest	Point of Rocks
	Magnoliopsida	6	Dipsacales	17	Adoxaceae	2	Viburnum montanum	243	561	Angiosperm	1	Camp	1	Knowlton, 1900	9	NULL	Eagle	4	50.3808	-79.6336	50.4596	-81.5727	49.5105	-84.0569	41.6817	-108.783	78.15	2.35	80	temperate lowland forest	2	2. temperate lowland forest	Point of Rocks
	Magnoliopsida	6	Ericales	20	Ebenaceae	33	Diospyros brachysepala	79	154	Angiosperm	1	Camp	1	Knowlton, 1900	9	NULL	Eagle	4	50.3808	-79.6336	50.4596	-81.5727	49.5105	-84.0569	41.6817	-108.783	78.15	2.35	80	tropical lowland forest	6	6. tropical lowland forest	Point of Rocks
	Magnoliopsida	6	Rosales?	52	Ulmaceae?	94	Carpites triangulosus	34	55	Angiosperm	1	Camp	1	Knowlton, 1900	9	NULL	Eagle	4	50.3808	-79.6336	50.4596	-81.5727	49.5105	-84.0569	41.6817	-108.783	78.15	2.35	80	temperate lowland forest	2	2. temperate lowland forest	Point of Rocks
	Magnoliopsida	6	Lamiales	30	Oleaceae	65	Phyllites triloba	172	377	Angiosperm	1	Camp	1	Knowlton, 1900	9	NULL	Eagle	4	50.3808	-79.6336	50.4596	-81.5727	49.5105	-84.0569	41.6817	-108.783	78.15	2.35	80	unknown	0	0. unknown	Point of Rocks
	Magnoliopsida	6	Lamiales	30	Oleaceae	65	Phyllites sp.	172	376	Angiosperm	1	Camp	1	Knowlton, 1900	9	NULL	Eagle	4	50.3808	-79.6336	50.4596	-81.5727	49.5105	-84.0569	41.6817	-108.783	78.15	2.35	80	unknown	0	0. unknown	Point of Rocks
	Pinopsida	9	Pinales	42	Cupressaceae	24	Sequoia sp.	225	527	Gymnosperm	3	Camp	1	Knowlton, 1900	9	NULL	Eagle	4	49.6836	-81.7666	49.7472	-83.6965	48.7835	-86.1276	40.9168	-111.397	78.15	2.35	80	temperate lowland forest	2	2. temperate lowland forest	Coalville
	Magnoliopsida	6	Malpighiales	36	Salicaceae	84	Salix angusta	214	496	Angiosperm	1	Camp	1	Knowlton, 1900	9	NULL	Eagle	4	49.6836	-81.7666	49.7472	-83.6965	48.7835	-86.1276	40.9168	-111.397	78.15	2.35	80	temperate lowland forest	2	2. temperate lowland forest	Coalville
	Magnoliopsida	6	Malpighiales	36	Salicaceae	84	Salix stantonii	214	503	Angiosperm	1	Camp	1	Knowlton, 1900	9	NULL	Eagle	4	49.6836	-81.7666	49.7472	-83.6965	48.7835	-86.1276	40.9168	-111.397	78.15	2.35	80	temperate lowland forest	2	2. temperate lowland forest	Coalville
	Magnoliopsida	6	Malpighiales	36	Salicaceae	84	Salix sp.	214	502	Angiosperm	1	Camp	1	Knowlton, 1900	9	NULL	Eagle	4	49.6836	-81.7666	49.7472	-83.6965	48.7835	-86.1276	40.9168	-111.397	78.15	2.35	80	temperate lowland forest	2	2. temperate lowland forest	Coalville
	Magnoliopsida	6	Rosales	51	Moraceae	61	Ficus multinervis	92	189	Angiosperm	1	Camp	1	Knowlton, 1900	9	NULL	Eagle	4	49.6836	-81.7666	49.7472	-83.6965	48.7835	-86.1276	40.9168	-111.397	78.15	2.35	80	tropical lowland forest	6	6. tropical lowland forest	Coalville
	Magnoliopsida	6	Rosales	51	Moraceae	61	Ficus planicostata	92	190	Angiosperm	1	Camp	1	Knowlton, 1900	9	NULL	Eagle	4	49.6836	-81.7666	49.7472	-83.6965	48.7835	-86.1276	40.9168	-111.397	78.15	2.35	80	tropical lowland forest	6	6. tropical lowland forest	Coalville
	Magnoliopsida	6	Magnoliales	34	Magnoliaceae	55	Magnolia tenuinervis	127	294	Angiosperm	1	Camp	1	Knowlton, 1900	9	NULL	Eagle	4	49.6836	-81.7666	49.7472	-83.6965	48.7835	-86.1276	40.9168	-111.397	78.15	2.35	80	tropical lowland forest	6	6. tropical lowland forest	Coalville
	Magnoliopsida	6	Laurales	31	Lauraceae	51	Cinnamomum affine	50	82	Angiosperm	1	Camp	1	Knowlton, 1900	9	NULL	Eagle	4	49.6836	-81.7666	49.7472	-83.6965	48.7835	-86.1276	40.9168	-111.397	78.15	2.35	80	tropical lowland forest	6	6. tropical lowland forest	Coalville
	Magnoliopsida	6	Laurales	31	Lauraceae	51	Cinnamomum stantonii	50	87	Angiosperm	1	Camp	1	Knowlton, 1900	9	NULL	Eagle	4	49.6836	-81.7666	49.7472	-83.6965	48.7835	-86.1276	40.9168	-111.397	78.15	2.35	80	tropical lowland forest	6	6. tropical lowland forest	Coalville
	Magnoliopsida	6	Dipsacales	17	Adoxaceae	2	Viburnum problematicum	243	563	Angiosperm	1	Camp	1	Knowlton, 1900	9	NULL	Eagle	4	49.6836	-81.7666	49.7472	-83.6965	48.7835	-86.1276	40.9168	-111.397	78.15	2.35	80	temperate lowland forest	2	2. temperate lowland forest	Coalville
	Polypodiopsida	10	Filicales	23	uncertain	101	Filicales, unknown	93	206	Fern/Moss	2	Camp	1	Knowlton, 1905	10	NULL	Judith River	9	56.6314	-76.7617	56.7431	-78.9872	55.8268	-81.8546	48.0262	-110.222	77.45	2.25	80	unknown	0	0. unknown	NULL
	Polypodiopsida	10	Filicales	23	uncertain	101	Filicales, unknown	93	206	Fern/Moss	2	Camp	1	Knowlton, 1905	10	NULL	Judith River	9	56.6314	-76.7617	56.7431	-78.9872	55.8268	-81.8546	48.0262	-110.222	77.45	2.25	80	unknown	0	0. unknown	NULL
	Polypodiopsida	10	Osmundales	41	Osmundaceae	67	Osmunda montanensis	158	351	Fern/Moss	2	Camp	1	Knowlton, 1905	10	NULL	Judith River	9	56.6314	-76.7617	56.7431	-78.9872	55.8268	-81.8546	48.0262	-110.222	77.45	2.25	80	temperate lowland forest	2	2. temperate lowland forest	NULL
	Liliopsida	4	Poales	45	Cyperaceae	27	Cyperacites sp.	68	124	Angiosperm	1	Camp	1	Knowlton, 1905	10	NULL	Judith River	9	56.6314	-76.7617	56.7431	-78.9872	55.8268	-81.8546	48.0262	-110.222	77.45	2.25	80	wet, successional	5	5. wet, successional	NULL
	Pinopsida	9	Pinales	42	Cupressaceae	24	Sequoia reichenbachi	225	526	Gymnosperm	3	Camp	1	Knowlton, 1905	10	NULL	Judith River	9	56.6314	-76.7617	56.7431	-78.9872	55.8268	-81.8546	48.0262	-110.222	77.45	2.25	80	temperate lowland forest	2	2. temperate lowland forest	NULL
	Pinopsida	9	Pinales	42	Cupressaceae	24	Sequoia sp.	225	527	Gymnosperm	3	Camp	1	Knowlton, 1905	10	NULL	Judith River	9	56.6314	-76.7617	56.7431	-78.9872	55.8268	-81.8546	48.0262	-110.222	77.45	2.25	80	temperate lowland forest	2	2. temperate lowland forest	NULL
	Pinopsida	9	Pinales	42	Cupressaceae	24	Sequoia heterophylla	225	522	Gymnosperm	3	Camp	1	Knowlton, 1905	10	NULL	Judith River	9	56.6314	-76.7617	56.7431	-78.9872	55.8268	-81.8546	48.0262	-110.222	77.45	2.25	80	temperate lowland forest	2	2. temperate lowland forest	NULL
	Pinopsida	9	Pinales	42	Cupressaceae	24	Thuja cretacea	234	538	Gymnosperm	3	Camp	1	Knowlton, 1905	10	NULL	Judith River	9	56.6314	-76.7617	56.7431	-78.9872	55.8268	-81.8546	48.0262	-110.222	77.45	2.25	80	temperate lowland forest	2	2. temperate lowland forest	NULL
	Pinopsida	9	Pinales	42	Araucariaceae	8	Dammara acicularis	70	126	Gymnosperm	3	Camp	1	Knowlton, 1905	10	NULL	Judith River	9	56.6314	-76.7617	56.7431	-78.9872	55.8268	-81.8546	48.0262	-110.222	77.45	2.25	80	temperate lowland forest	2	2. temperate lowland forest	NULL
	Pinopsida	9	Pinales	42	Cupressaceae	24	Cunninghamites elegans	62	111	Gymnosperm	3	Camp	1	Knowlton, 1905	10	NULL	Judith River	9	56.6314	-76.7617	56.7431	-78.9872	55.8268	-81.8546	48.0262	-110.222	77.45	2.25	80	temperate lowland forest	2	2. temperate lowland forest	NULL
	Pinopsida	9	Pinales	42	Cupressaceae	24	Cunninghamites recurvatus	62	113	Gymnosperm	3	Camp	1	Knowlton, 1905	10	NULL	Judith River	9	56.6314	-76.7617	56.7431	-78.9872	55.8268	-81.8546	48.0262	-110.222	77.45	2.25	80	temperate lowland forest	2	2. temperate lowland forest	NULL
	Pinopsida	9	Pinales	42	Cupressaceae	24	Cunninghamites pulchellus	62	112	Gymnosperm	3	Camp	1	Knowlton, 1905	10	NULL	Judith River	9	56.6314	-76.7617	56.7431	-78.9872	55.8268	-81.8546	48.0262	-110.222	77.45	2.25	80	temperate lowland forest	2	2. temperate lowland forest	NULL
	Magnoliopsida	6	Malpighiales	36	Salicaceae	84	Populus cretacea	189	431	Angiosperm	1	Camp	1	Knowlton, 1905	10	NULL	Judith River	9	56.6314	-76.7617	56.7431	-78.9872	55.8268	-81.8546	48.0262	-110.222	77.45	2.25	80	wet, successional	5	5. wet, successional	NULL
	Magnoliopsida	6	Malpighiales	36	Salicaceae	84	Populus sp.	189	438	Angiosperm	1	Camp	1	Knowlton, 1905	10	NULL	Judith River	9	56.6314	-76.7617	56.7431	-78.9872	55.8268	-81.8546	48.0262	-110.222	77.45	2.25	80	wet, successional	5	5. wet, successional	NULL
	Magnoliopsida	6	Malpighiales	36	Salicaceae	84	Populus amplus	189	429	Angiosperm	1	Camp	1	Knowlton, 1905	10	NULL	Judith River	9	56.6314	-76.7617	56.7431	-78.9872	55.8268	-81.8546	48.0262	-110.222	77.45	2.25	80	wet, successional	5	5. wet, successional	NULL
	Magnoliopsida	6	Fagales	22	Betulaceae	13	Betulites hatcheri	29	42	Angiosperm	1	Camp	1	Knowlton, 1905	10	NULL	Judith River	9	56.6314	-76.7617	56.7431	-78.9872	55.8268	-81.8546	48.0262	-110.222	77.45	2.25	80	temperate lowland forest	2	2. temperate lowland forest	NULL
	Magnoliopsida	6	Fagales	22	Fagaceae	39	Quercus montana	197	456	Angiosperm	1	Camp	1	Knowlton, 1905	10	NULL	Judith River	9	56.6314	-76.7617	56.7431	-78.9872	55.8268	-81.8546	48.0262	-110.222	77.45	2.25	80	temperate lowland forest	2	2. temperate lowland forest	NULL
	Magnoliopsida	6	Sapindales	54	Sapindaceae	86	Sapindus inexpectans	217	507	Angiosperm	1	Camp	1	Knowlton, 1905	10	NULL	Judith River	9	56.6314	-76.7617	56.7431	-78.9872	55.8268	-81.8546	48.0262	-110.222	77.45	2.25	80	tropical lowland forest	6	6. tropical lowland forest	NULL
	Magnoliopsida	6	Myrtales	39	Lythraceae	54	Trapa cuneata	235	541	Angiosperm	1	Camp	1	Knowlton, 1905	10	NULL	Judith River	9	56.6314	-76.7617	56.7431	-78.9872	55.8268	-81.8546	48.0262	-110.222	77.45	2.25	80	estuarine, aquatic	7	7. estuarine, aquatic	NULL
	Magnoliopsida	6	Ericales	20	Ebenaceae	33	Diospyros judithae	79	155	Angiosperm	1	Camp	1	Knowlton, 1905	10	NULL	Judith River	9	56.6314	-76.7617	56.7431	-78.9872	55.8268	-81.8546	48.0262	-110.222	77.45	2.25	80	tropical lowland forest	6	6. tropical lowland forest	NULL
	Magnoliopsida	6	Nymphaeales	40	Nymphaeaceae	64	Castalia stantonii	37	61	Angiosperm	1	Camp	1	Knowlton, 1905	10	NULL	Judith River	9	56.6314	-76.7617	56.7431	-78.9872	55.8268	-81.8546	48.0262	-110.222	77.45	2.25	80	estuarine, aquatic	7	7. estuarine, aquatic	NULL
	Magnoliopsida	6	Lamiales	30	Oleaceae	65	Phyllites denticulatus	172	372	Angiosperm	1	Camp	1	Knowlton, 1905	10	NULL	Judith River	9	56.6314	-76.7617	56.7431	-78.9872	55.8268	-81.8546	48.0262	-110.222	77.45	2.25	80	unknown	0	0. unknown	NULL
	Magnoliopsida	6	Lamiales	30	Oleaceae	65	Phyllites intricata	172	373	Angiosperm	1	Camp	1	Knowlton, 1905	10	NULL	Judith River	9	56.6314	-76.7617	56.7431	-78.9872	55.8268	-81.8546	48.0262	-110.222	77.45	2.25	80	unknown	0	0. unknown	NULL
	Magnoliopsida	6	Rosales?	52	Ulmaceae?	94	Carpites judithae	34	51	Angiosperm	1	Camp	1	Knowlton, 1905	10	NULL	Judith River	9	56.6314	-76.7617	56.7431	-78.9872	55.8268	-81.8546	48.0262	-110.222	77.45	2.25	80	temperate lowland forest	2	2. temperate lowland forest	NULL
	Magnoliopsida	6	Rosales?	52	Ulmaceae?	94	Carpites pruni	34	53	Angiosperm	1	Camp	1	Knowlton, 1905	10	NULL	Judith River	9	56.6314	-76.7617	56.7431	-78.9872	55.8268	-81.8546	48.0262	-110.222	77.45	2.25	80	temperate lowland forest	2	2. temperate lowland forest	NULL
	Magnoliopsida	6	Rosales?	52	Ulmaceae?	94	Carpites alatus	34	49	Angiosperm	1	Camp	1	Knowlton, 1905	10	NULL	Judith River	9	56.6314	-76.7617	56.7431	-78.9872	55.8268	-81.8546	48.0262	-110.222	77.45	2.25	80	temperate lowland forest	2	2. temperate lowland forest	NULL
	Polypodiopsida	10	Cyatheales	13	Cyatheaceae	25	Cyathea pinnata	66	121	Fern/Moss	2	Camp	1	Parker, 1976	13	1.47622	Blackhawk	3	48.3295	-83.7298	48.379	-85.6392	47.4032	-88.0136	39.0021	-111.454	79.95	3.65	80	tropical lowland forest	6	6. tropical lowland forest	Swamps
	Polypodiopsida	10	Polypodiales	46	Onocleaceae	66	Onoclea hebridica	157	346	Fern/Moss	2	Camp	1	Parker, 1976	13	1.62983	Blackhawk	3	48.3295	-83.7298	48.379	-85.6392	47.4032	-88.0136	39.0021	-111.454	79.95	3.65	80	wet, successional	5	5. wet, successional	Swamps
	Pinopsida	9	Pinales	42	Araucariaceae	8	Brachyphyllum macrocarpum	31	45	Gymnosperm	3	Camp	1	Parker, 1976	13	6.18417	Blackhawk	3	48.3295	-83.7298	48.379	-85.6392	47.4032	-88.0136	39.0021	-111.454	79.95	3.65	80	coastal plain	4	4. coastal plain	Swamps
	Pinopsida	9	Pinales	42	Cheirolepidiaceae	21	Moriconia cyclotoxon	147	328	Gymnosperm	3	Camp	1	Parker, 1976	13	1.25678	Blackhawk	3	48.3295	-83.7298	48.379	-85.6392	47.4032	-88.0136	39.0021	-111.454	79.95	3.65	80	temperate lowland forest	2	2. temperate lowland forest	Swamps
	Cycadopsida	2	Cycadales?	15	uncertain	101	Nageiopsis sp.	150	334	Gymnosperm	3	Camp	1	Parker, 1976	13	42.97	Blackhawk	3	48.3295	-83.7298	48.379	-85.6392	47.4032	-88.0136	39.0021	-111.454	79.95	3.65	80	unknown	0	0. unknown	Swamps
	Pinopsida	9	Pinales?	43	Phyllocladaceae?	69	Protophyllocladus polymorphus	193	444	Gymnosperm	3	Camp	1	Parker, 1976	13	3.18983	Blackhawk	3	48.3295	-83.7298	48.379	-85.6392	47.4032	-88.0136	39.0021	-111.454	79.95	3.65	80	temperate lowland forest	2	2. temperate lowland forest	Swamps
	Pinopsida	9	Pinales	42	Cupressaceae	24	Sequoia cuneata	225	520	Gymnosperm	3	Camp	1	Parker, 1976	13	19.1031	Blackhawk	3	48.3295	-83.7298	48.379	-85.6392	47.4032	-88.0136	39.0021	-111.454	79.95	3.65	80	temperate lowland forest	2	2. temperate lowland forest	Swamps
	Pinopsida	9	Pinales	42	Cupressaceae	24	Widdringtonites reichii	247	570	Gymnosperm	3	Camp	1	Parker, 1976	13	0.478774	Blackhawk	3	48.3295	-83.7298	48.379	-85.6392	47.4032	-88.0136	39.0021	-111.454	79.95	3.65	80	upland forest	1	1. upland forest	Swamps
	Liliopsida	4	Arecales	3	Arecaceae	9	Geonomites imperialis	99	222	Angiosperm	1	Camp	1	Parker, 1976	13	1.11315	Blackhawk	3	48.3295	-83.7298	48.379	-85.6392	47.4032	-88.0136	39.0021	-111.454	79.95	3.65	80	coastal plain	4	4. coastal plain	Swamps
	Liliopsida	4	Poales	45	Cyperaceae	27	Cyperacites sp.	68	124	Angiosperm	1	Camp	1	Parker, 1976	13	0.734121	Blackhawk	3	48.3295	-83.7298	48.379	-85.6392	47.4032	-88.0136	39.0021	-111.454	79.95	3.65	80	wet, successional	5	5. wet, successional	Swamps
	Magnoliopsida	6	Magnoliales	34	Annonaceae	5	Anona robusta	9	13	Angiosperm	1	Camp	1	Parker, 1976	13	0.398979	Blackhawk	3	48.3295	-83.7298	48.379	-85.6392	47.4032	-88.0136	39.0021	-111.454	79.95	3.65	80	tropical lowland forest	6	6. tropical lowland forest	Swamps
	Magnoliopsida	6	Vitales	61	Vitaceae	96	Cissus marginata	52	93	Angiosperm	1	Camp	1	Parker, 1976	13	2.2263	Blackhawk	3	48.3295	-83.7298	48.379	-85.6392	47.4032	-88.0136	39.0021	-111.454	79.95	3.65	80	upland forest	1	1. upland forest	Swamps
	Magnoliopsida	6	Cornales	11	Cornaceae	23	Cornus praeimpress	59	104	Angiosperm	1	Camp	1	Parker, 1976	13	1.25678	Blackhawk	3	48.3295	-83.7298	48.379	-85.6392	47.4032	-88.0136	39.0021	-111.454	79.95	3.65	80	temperate lowland forest	2	2. temperate lowland forest	Swamps
	Magnoliopsida	6	Rosales	51	Moraceae	61	Ficus planicostata	92	190	Angiosperm	1	Camp	1	Parker, 1976	13	0.438876	Blackhawk	3	48.3295	-83.7298	48.379	-85.6392	47.4032	-88.0136	39.0021	-111.454	79.95	3.65	80	tropical lowland forest	6	6. tropical lowland forest	Swamps
	Magnoliopsida	6	Rosales	51	Rhamnaceae	81	Rhamnites eminens	204	465	Angiosperm	1	Camp	1	Parker, 1976	13	4.93736	Blackhawk	3	48.3295	-83.7298	48.379	-85.6392	47.4032	-88.0136	39.0021	-111.454	79.95	3.65	80	tropical lowland forest	6	6. tropical lowland forest	Swamps
	Magnoliopsida	6	Malpighiales	36	Salicaceae	84	Salix proteaefolia	214	500	Angiosperm	1	Camp	1	Parker, 1976	13	0.438876	Blackhawk	3	48.3295	-83.7298	48.379	-85.6392	47.4032	-88.0136	39.0021	-111.454	79.95	3.65	80	temperate lowland forest	2	2. temperate lowland forest	Swamps
	Polypodiopsida	10	Osmundales	41	Osmundaceae	67	Osmunda hollicki	158	350	Fern/Moss	2	Camp	1	Parker, 1976	13	0.295244	Blackhawk	3	48.3295	-83.7298	48.379	-85.6392	47.4032	-88.0136	39.0021	-111.454	79.95	3.65	80	temperate lowland forest	2	2. temperate lowland forest	Swamps
	Magnoliopsida	6	Gentianales	25	Apocynaceae	6	Apocynophyllum giganteum	10	14	Angiosperm	1	Camp	1	Parker, 1976	13	0.259336	Blackhawk	3	48.3295	-83.7298	48.379	-85.6392	47.4032	-88.0136	39.0021	-111.454	79.95	3.65	80	temperate lowland forest	2	2. temperate lowland forest	Swamps
	Magnoliopsida	6	Saxifragales	55	Cercidiphyllaceae	20	Cercidiphyllum arcticum	47	74	Angiosperm	1	Camp	1	Parker, 1976	13	0.706192	Blackhawk	3	48.3295	-83.7298	48.379	-85.6392	47.4032	-88.0136	39.0021	-111.454	79.95	3.65	80	temperate lowland forest	2	2. temperate lowland forest	Swamps
	Magnoliopsida	6	Cornales	11	Cornaceae	23	Cornus denverensis	59	102	Angiosperm	1	Camp	1	Parker, 1976	13	0.323173	Blackhawk	3	48.3295	-83.7298	48.379	-85.6392	47.4032	-88.0136	39.0021	-111.454	79.95	3.65	80	temperate lowland forest	2	2. temperate lowland forest	Swamps
	Magnoliopsida	6	Fagales	22	Fagaceae	39	Dryophyllum giganteum	81	160	Angiosperm	1	Camp	1	Parker, 1976	13	1.20891	Blackhawk	3	48.3295	-83.7298	48.379	-85.6392	47.4032	-88.0136	39.0021	-111.454	79.95	3.65	80	temperate lowland forest	2	2. temperate lowland forest	Swamps
	Magnoliopsida	6	Rosales	51	Moraceae	61	Ficus laurophylla	92	186	Angiosperm	1	Camp	1	Parker, 1976	13	0.197494	Blackhawk	3	48.3295	-83.7298	48.379	-85.6392	47.4032	-88.0136	39.0021	-111.454	79.95	3.65	80	tropical lowland forest	6	6. tropical lowland forest	Swamps
	Magnoliopsida	6	Malpighiales	36	Euphorbiaceae	37	Manihotites georgiana	135	309	Angiosperm	1	Camp	1	Parker, 1976	13	0.283275	Blackhawk	3	48.3295	-83.7298	48.379	-85.6392	47.4032	-88.0136	39.0021	-111.454	79.95	3.65	80	tropical lowland forest	6	6. tropical lowland forest	Swamps
	Magnoliopsida	6	Malpighiales	36	Salicaceae	84	Myrtophyllum torreyi	149	333	Angiosperm	1	Camp	1	Parker, 1976	13	0.84783	Blackhawk	3	48.3295	-83.7298	48.379	-85.6392	47.4032	-88.0136	39.0021	-111.454	79.95	3.65	80	tropical lowland forest	6	6. tropical lowland forest	Swamps
	Magnoliopsida	6	Proteales	47	Platanaceae	72	Platanus alata	184	416	Angiosperm	1	Camp	1	Parker, 1976	13	0.323173	Blackhawk	3	48.3295	-83.7298	48.379	-85.6392	47.4032	-88.0136	39.0021	-111.454	79.95	3.65	80	temperate lowland forest	2	2. temperate lowland forest	Swamps
	Magnoliopsida	6	Proteales	47	Platanaceae	72	Platanus raynoldsii	184	420	Angiosperm	1	Camp	1	Parker, 1976	13	3.39331	Blackhawk	3	48.3295	-83.7298	48.379	-85.6392	47.4032	-88.0136	39.0021	-111.454	79.95	3.65	80	temperate lowland forest	2	2. temperate lowland forest	Swamps
	Magnoliopsida	6	Dipsacales	17	Adoxaceae	2	Viburnum antiguum	243	555	Angiosperm	1	Camp	1	Parker, 1976	13	0.239387	Blackhawk	3	48.3295	-83.7298	48.379	-85.6392	47.4032	-88.0136	39.0021	-111.454	79.95	3.65	80	temperate lowland forest	2	2. temperate lowland forest	Swamps
	Pinopsida	9	Pinales	42	Podocarpaceae	74	Podozamites sp.	188	425	Gymnosperm	3	Camp	1	Parker, 1976	13	1.10916	Blackhawk	3	48.3295	-83.7298	48.379	-85.6392	47.4032	-88.0136	39.0021	-111.454	79.95	3.65	80	temperate lowland forest	2	2. temperate lowland forest	Swamps
	Polypodiopsida	10	Polypodiales	46	Onocleaceae	66	Onoclea hebridica	157	346	Fern/Moss	2	Camp	1	Parker, 1976	13	0.158631	Blackhawk	3	48.3295	-83.7298	48.379	-85.6392	47.4032	-88.0136	39.0021	-111.454	79.95	3.65	80	wet, successional	5	5. wet, successional	Bottomlands
	Pinopsida	9	Pinales	42	Cheirolepidiaceae	21	Moriconia cyclotoxon	147	328	Gymnosperm	3	Camp	1	Parker, 1976	13	0.258236	Blackhawk	3	48.3295	-83.7298	48.379	-85.6392	47.4032	-88.0136	39.0021	-111.454	79.95	3.65	80	temperate lowland forest	2	2. temperate lowland forest	Bottomlands
	Pinopsida	9	Pinales?	43	Phyllocladaceae?	69	Protophyllocladus polymorphus	193	444	Gymnosperm	3	Camp	1	Parker, 1976	13	2.72254	Blackhawk	3	48.3295	-83.7298	48.379	-85.6392	47.4032	-88.0136	39.0021	-111.454	79.95	3.65	80	temperate lowland forest	2	2. temperate lowland forest	Bottomlands
	Pinopsida	9	Pinales	42	Cupressaceae	24	Sequoia cuneata	225	520	Gymnosperm	3	Camp	1	Parker, 1976	13	1.8593	Blackhawk	3	48.3295	-83.7298	48.379	-85.6392	47.4032	-88.0136	39.0021	-111.454	79.95	3.65	80	temperate lowland forest	2	2. temperate lowland forest	Bottomlands
	Liliopsida	4	Arecales	3	Arecaceae	9	Geonomites imperialis	99	222	Angiosperm	1	Camp	1	Parker, 1976	13	2.05851	Blackhawk	3	48.3295	-83.7298	48.379	-85.6392	47.4032	-88.0136	39.0021	-111.454	79.95	3.65	80	coastal plain	4	4. coastal plain	Bottomlands
	Liliopsida	4	Poales	45	Cyperaceae	27	Cyperacites sp.	68	124	Angiosperm	1	Camp	1	Parker, 1976	13	0.339396	Blackhawk	3	48.3295	-83.7298	48.379	-85.6392	47.4032	-88.0136	39.0021	-111.454	79.95	3.65	80	wet, successional	5	5. wet, successional	Bottomlands
	Magnoliopsida	6	Vitales	61	Vitaceae	96	Cissus marginata	52	93	Angiosperm	1	Camp	1	Parker, 1976	13	2.40159	Blackhawk	3	48.3295	-83.7298	48.379	-85.6392	47.4032	-88.0136	39.0021	-111.454	79.95	3.65	80	upland forest	1	1. upland forest	Bottomlands
	Magnoliopsida	6	Cornales	11	Cornaceae	23	Cornus praeimpress	59	104	Angiosperm	1	Camp	1	Parker, 1976	13	0.619766	Blackhawk	3	48.3295	-83.7298	48.379	-85.6392	47.4032	-88.0136	39.0021	-111.454	79.95	3.65	80	temperate lowland forest	2	2. temperate lowland forest	Bottomlands
	Magnoliopsida	6	Rosales	51	Rhamnaceae	81	Rhamnites eminens	204	465	Angiosperm	1	Camp	1	Parker, 1976	13	1.8261	Blackhawk	3	48.3295	-83.7298	48.379	-85.6392	47.4032	-88.0136	39.0021	-111.454	79.95	3.65	80	tropical lowland forest	6	6. tropical lowland forest	Bottomlands
	Polypodiopsida	10	Osmundales	41	Osmundaceae	67	Osmunda hollicki	158	350	Fern/Moss	2	Camp	1	Parker, 1976	13	2.18394	Blackhawk	3	48.3295	-83.7298	48.379	-85.6392	47.4032	-88.0136	39.0021	-111.454	79.95	3.65	80	temperate lowland forest	2	2. temperate lowland forest	Bottomlands
	Pinopsida	9	Pinales?	43	Phyllocladaceae?	69	Protophyllocladus sp.	193	445	Gymnosperm	3	Camp	1	Parker, 1976	13	3.68908	Blackhawk	3	48.3295	-83.7298	48.379	-85.6392	47.4032	-88.0136	39.0021	-111.454	79.95	3.65	80	temperate lowland forest	2	2. temperate lowland forest	Bottomlands
	Magnoliopsida	6	Gentianales	25	Apocynaceae	6	Apocynophyllum giganteum	10	14	Angiosperm	1	Camp	1	Parker, 1976	13	1.43874	Blackhawk	3	48.3295	-83.7298	48.379	-85.6392	47.4032	-88.0136	39.0021	-111.454	79.95	3.65	80	temperate lowland forest	2	2. temperate lowland forest	Bottomlands
	Magnoliopsida	6	Saxifragales	55	Cercidiphyllaceae	20	Cercidiphyllum arcticum	47	74	Angiosperm	1	Camp	1	Parker, 1976	13	23.5068	Blackhawk	3	48.3295	-83.7298	48.379	-85.6392	47.4032	-88.0136	39.0021	-111.454	79.95	3.65	80	temperate lowland forest	2	2. temperate lowland forest	Bottomlands
	Magnoliopsida	6	Cornales	11	Cornaceae	23	Cornus denverensis	59	102	Angiosperm	1	Camp	1	Parker, 1976	13	0.730439	Blackhawk	3	48.3295	-83.7298	48.379	-85.6392	47.4032	-88.0136	39.0021	-111.454	79.95	3.65	80	temperate lowland forest	2	2. temperate lowland forest	Bottomlands
	Magnoliopsida	6	Fagales	22	Fagaceae	39	Dryophyllum giganteum	81	160	Angiosperm	1	Camp	1	Parker, 1976	13	11.1779	Blackhawk	3	48.3295	-83.7298	48.379	-85.6392	47.4032	-88.0136	39.0021	-111.454	79.95	3.65	80	temperate lowland forest	2	2. temperate lowland forest	Bottomlands
	Magnoliopsida	6	Fagales	22	Fagaceae	39	Dryophyllum sp.	81	162	Angiosperm	1	Camp	1	Parker, 1976	13	1.91832	Blackhawk	3	48.3295	-83.7298	48.379	-85.6392	47.4032	-88.0136	39.0021	-111.454	79.95	3.65	80	temperate lowland forest	2	2. temperate lowland forest	Bottomlands
	Magnoliopsida	6	Rosales	51	Moraceae	61	Ficus laurophylla	92	186	Angiosperm	1	Camp	1	Parker, 1976	13	0.446379	Blackhawk	3	48.3295	-83.7298	48.379	-85.6392	47.4032	-88.0136	39.0021	-111.454	79.95	3.65	80	tropical lowland forest	6	6. tropical lowland forest	Bottomlands
	Magnoliopsida	6	Laurales	31	Lauraceae	51	Laurophyllum coloradensis	115	264	Angiosperm	1	Camp	1	Parker, 1976	13	4.05799	Blackhawk	3	48.3295	-83.7298	48.379	-85.6392	47.4032	-88.0136	39.0021	-111.454	79.95	3.65	80	tropical lowland forest	6	6. tropical lowland forest	Bottomlands
	Magnoliopsida	6	Malpighiales	36	Euphorbiaceae	37	Manihotites georgiana	135	309	Angiosperm	1	Camp	1	Parker, 1976	13	4.45272	Blackhawk	3	48.3295	-83.7298	48.379	-85.6392	47.4032	-88.0136	39.0021	-111.454	79.95	3.65	80	tropical lowland forest	6	6. tropical lowland forest	Bottomlands
	Magnoliopsida	6	Ranunculales	48	Menispermaceae	60	Menispermum dauricumoides	142	321	Angiosperm	1	Camp	1	Parker, 1976	13	0.649279	Blackhawk	3	48.3295	-83.7298	48.379	-85.6392	47.4032	-88.0136	39.0021	-111.454	79.95	3.65	80	tropical lowland forest	6	6. tropical lowland forest	Bottomlands
	Magnoliopsida	6	Malpighiales	36	Salicaceae	84	Myrtophyllum torreyi	149	333	Angiosperm	1	Camp	1	Parker, 1976	13	4.70358	Blackhawk	3	48.3295	-83.7298	48.379	-85.6392	47.4032	-88.0136	39.0021	-111.454	79.95	3.65	80	tropical lowland forest	6	6. tropical lowland forest	Bottomlands
	Magnoliopsida	6	Proteales	47	Platanaceae	72	Platanus alata	184	416	Angiosperm	1	Camp	1	Parker, 1976	13	0.730439	Blackhawk	3	48.3295	-83.7298	48.379	-85.6392	47.4032	-88.0136	39.0021	-111.454	79.95	3.65	80	temperate lowland forest	2	2. temperate lowland forest	Bottomlands
	Magnoliopsida	6	Proteales	47	Platanaceae	72	Platanus raynoldsii	184	420	Angiosperm	1	Camp	1	Parker, 1976	13	9.86092	Blackhawk	3	48.3295	-83.7298	48.379	-85.6392	47.4032	-88.0136	39.0021	-111.454	79.95	3.65	80	temperate lowland forest	2	2. temperate lowland forest	Bottomlands
	Magnoliopsida	6	Dipsacales	17	Adoxaceae	2	Viburnum antiguum	243	555	Angiosperm	1	Camp	1	Parker, 1976	13	1.66009	Blackhawk	3	48.3295	-83.7298	48.379	-85.6392	47.4032	-88.0136	39.0021	-111.454	79.95	3.65	80	temperate lowland forest	2	2. temperate lowland forest	Bottomlands
	Pinopsida	9	Pinales?	43	Phyllocladaceae?	69	Protophyllocladus polymorphus	193	444	Gymnosperm	3	Camp	1	Parker, 1976	13	2.25895	Blackhawk	3	48.3295	-83.7298	48.379	-85.6392	47.4032	-88.0136	39.0021	-111.454	79.95	3.65	80	temperate lowland forest	2	2. temperate lowland forest	Point Bars
	Liliopsida	4	Arecales	3	Arecaceae	9	Geonomites imperialis	99	222	Angiosperm	1	Camp	1	Parker, 1976	13	2.27732	Blackhawk	3	48.3295	-83.7298	48.379	-85.6392	47.4032	-88.0136	39.0021	-111.454	79.95	3.65	80	coastal plain	4	4. coastal plain	Point Bars
	Magnoliopsida	6	Vitales	61	Vitaceae	96	Cissus marginata	52	93	Angiosperm	1	Camp	1	Parker, 1976	13	1.70799	Blackhawk	3	48.3295	-83.7298	48.379	-85.6392	47.4032	-88.0136	39.0021	-111.454	79.95	3.65	80	upland forest	1	1. upland forest	Point Bars
	Magnoliopsida	6	Cornales	11	Cornaceae	23	Cornus praeimpress	59	104	Angiosperm	1	Camp	1	Parker, 1976	13	0.77135	Blackhawk	3	48.3295	-83.7298	48.379	-85.6392	47.4032	-88.0136	39.0021	-111.454	79.95	3.65	80	temperate lowland forest	2	2. temperate lowland forest	Point Bars
	Magnoliopsida	6	Rosales	51	Rhamnaceae	81	Rhamnites eminens	204	465	Angiosperm	1	Camp	1	Parker, 1976	13	6.06061	Blackhawk	3	48.3295	-83.7298	48.379	-85.6392	47.4032	-88.0136	39.0021	-111.454	79.95	3.65	80	tropical lowland forest	6	6. tropical lowland forest	Point Bars
	Magnoliopsida	6	Saxifragales	55	Cercidiphyllaceae	20	Cercidiphyllum arcticum	47	74	Angiosperm	1	Camp	1	Parker, 1976	13	6.50138	Blackhawk	3	48.3295	-83.7298	48.379	-85.6392	47.4032	-88.0136	39.0021	-111.454	79.95	3.65	80	temperate lowland forest	2	2. temperate lowland forest	Point Bars
	Magnoliopsida	6	Fagales	22	Fagaceae	39	Dryophyllum giganteum	81	160	Angiosperm	1	Camp	1	Parker, 1976	13	7.41965	Blackhawk	3	48.3295	-83.7298	48.379	-85.6392	47.4032	-88.0136	39.0021	-111.454	79.95	3.65	80	temperate lowland forest	2	2. temperate lowland forest	Point Bars
	Magnoliopsida	6	Malpighiales	36	Euphorbiaceae	37	Manihotites georgiana	135	309	Angiosperm	1	Camp	1	Parker, 1976	13	1.30395	Blackhawk	3	48.3295	-83.7298	48.379	-85.6392	47.4032	-88.0136	39.0021	-111.454	79.95	3.65	80	tropical lowland forest	6	6. tropical lowland forest	Point Bars
	Magnoliopsida	6	Ranunculales	48	Menispermaceae	60	Menispermum dauricumoides	142	321	Angiosperm	1	Camp	1	Parker, 1976	13	0.808081	Blackhawk	3	48.3295	-83.7298	48.379	-85.6392	47.4032	-88.0136	39.0021	-111.454	79.95	3.65	80	tropical lowland forest	6	6. tropical lowland forest	Point Bars
	Magnoliopsida	6	Proteales	47	Platanaceae	72	Platanus raynoldsii	184	420	Angiosperm	1	Camp	1	Parker, 1976	13	8.92562	Blackhawk	3	48.3295	-83.7298	48.379	-85.6392	47.4032	-88.0136	39.0021	-111.454	79.95	3.65	80	temperate lowland forest	2	2. temperate lowland forest	Point Bars
	Magnoliopsida	6	Dipsacales	17	Adoxaceae	2	Viburnum antiguum	243	555	Angiosperm	1	Camp	1	Parker, 1976	13	0.550964	Blackhawk	3	48.3295	-83.7298	48.379	-85.6392	47.4032	-88.0136	39.0021	-111.454	79.95	3.65	80	temperate lowland forest	2	2. temperate lowland forest	Point Bars
	Pinopsida	9	Pinales	42	Araucariaceae	8	Araucarites sp.	16	22	Gymnosperm	3	Camp	1	Parker, 1976	13	20.5693	Blackhawk	3	48.3295	-83.7298	48.379	-85.6392	47.4032	-88.0136	39.0021	-111.454	79.95	3.65	80	coastal plain	4	4. coastal plain	Point Bars
	Pinopsida	9	Pinales	42	Podocarpaceae	74	Podozamites sp.	188	425	Gymnosperm	3	Camp	1	Parker, 1976	13	40.8448	Blackhawk	3	48.3295	-83.7298	48.379	-85.6392	47.4032	-88.0136	39.0021	-111.454	79.95	3.65	80	temperate lowland forest	2	2. temperate lowland forest	Point Bars
	Pinopsida	9	Pinales	42	Cupressaceae	24	Sequoia reichenbachi	225	526	Gymnosperm	3	Camp	1	Richardson, 1909	15	NULL	Mesaverde	12	47.9317	-80.7294	48.0029	-82.629	47.0464	-85.0535	39.1303	-108.83	77.45	2.25	75	temperate lowland forest	2	2. temperate lowland forest	NULL
	Liliopsida	4	Poales	45	Eriocaulaceae	35	Eriocaulon porosum	88	171	Angiosperm	1	Camp	1	Richardson, 1909	15	NULL	Mesaverde	12	47.9317	-80.7294	48.0029	-82.629	47.0464	-85.0535	39.1303	-108.83	77.45	2.25	75	wet, successional	5	5. wet, successional	NULL
	Magnoliopsida	6	Rosales	51	Moraceae	61	Ficus latifolia	92	185	Angiosperm	1	Camp	1	Richardson, 1909	15	NULL	Mesaverde	12	47.9317	-80.7294	48.0029	-82.629	47.0464	-85.0535	39.1303	-108.83	77.45	2.25	75	tropical lowland forest	6	6. tropical lowland forest	NULL
	Magnoliopsida	6	Fagales	22	Myricaceae	62	Myrica torreyi	148	331	Angiosperm	1	Camp	1	Richardson, 1909	15	NULL	Mesaverde	12	47.9317	-80.7294	48.0029	-82.629	47.0464	-85.0535	39.1303	-108.83	77.45	2.25	75	wet, successional	5	5. wet, successional	NULL
	Magnoliopsida	6	Magnoliales	34	Magnoliaceae	55	Magnolia sp.	127	293	Angiosperm	1	Camp	1	Richardson, 1909	15	NULL	Mesaverde	12	47.9317	-80.7294	48.0029	-82.629	47.0464	-85.0535	39.1303	-108.83	77.45	2.25	75	tropical lowland forest	6	6. tropical lowland forest	NULL
	Magnoliopsida	6	Malpighiales	36	Salicaceae	84	Salix sp.	214	502	Angiosperm	1	Camp	1	Richardson, 1909	15	NULL	Mesaverde	12	47.9317	-80.7294	48.0029	-82.629	47.0464	-85.0535	39.1303	-108.83	77.45	2.25	75	temperate lowland forest	2	2. temperate lowland forest	NULL
	Liliopsida	4	Arecales	3	Arecaceae	9	Sabalites grayanus	211	490	Angiosperm	1	Camp	1	Richardson, 1909	15	NULL	Mesaverde	12	47.9317	-80.7294	48.0029	-82.629	47.0464	-85.0535	39.1303	-108.83	77.45	2.25	75	swampy, lagoonal	3	3. swampy, lagoonal	NULL
	Magnoliopsida	6	Rosales	51	Moraceae	61	Ficus planicostata	92	190	Angiosperm	1	Camp	1	Richardson, 1909	15	NULL	Mesaverde	12	47.9317	-80.7294	48.0029	-82.629	47.0464	-85.0535	39.1303	-108.83	77.45	2.25	75	tropical lowland forest	6	6. tropical lowland forest	NULL
	Magnoliopsida	6	Laurales	31	Lauraceae	51	Cinnamomum affine	50	82	Angiosperm	1	Camp	1	Richardson, 1909	15	NULL	Mesaverde	12	47.9317	-80.7294	48.0029	-82.629	47.0464	-85.0535	39.1303	-108.83	77.45	2.25	75	tropical lowland forest	6	6. tropical lowland forest	NULL
	Magnoliopsida	6	Laurales	31	Lauraceae	51	Malapoenna sp.	133	307	Angiosperm	1	Camp	1	Richardson, 1909	15	NULL	Mesaverde	12	47.9317	-80.7294	48.0029	-82.629	47.0464	-85.0535	39.1303	-108.83	77.45	2.25	75	tropical lowland forest	6	6. tropical lowland forest	NULL
	Magnoliopsida	6	Rosales	51	Moraceae	61	Ficus sp.	92	197	Angiosperm	1	Camp	1	Richardson, 1909	15	NULL	Mesaverde	12	47.9317	-80.7294	48.0029	-82.629	47.0464	-85.0535	39.1303	-108.83	77.45	2.25	75	tropical lowland forest	6	6. tropical lowland forest	NULL
	Polypodiopsida	10	Schizaeales	56	Schizaeaceae	88	Anemia elongata	8	8	Fern/Moss	2	Camp	1	Skip and McGrew, 1977	17	NULL	Maudlow	11	54.9855	-78.8481	55.081	-81.0377	54.1474	-83.8135	46.0959	-111.099	78.9	2	80	tropical lowland forest	6	6. tropical lowland forest	NULL
	Polypodiopsida	10	Polypodiales	46	Aspleniaceae	11	Asplenites tenellum	23	32	Fern/Moss	2	Camp	1	Skip and McGrew, 1977	17	NULL	Maudlow	11	54.9855	-78.8481	55.081	-81.0377	54.1474	-83.8135	46.0959	-111.099	78.9	2	80	tropical lowland forest	6	6. tropical lowland forest	NULL
	Polypodiopsida	10	Polypodiales	46	Dryopteridaceae	32	Dryopteris carbonensis	82	165	Fern/Moss	2	Camp	1	Skip and McGrew, 1977	17	NULL	Maudlow	11	54.9855	-78.8481	55.081	-81.0377	54.1474	-83.8135	46.0959	-111.099	78.9	2	80	temperate lowland forest	2	2. temperate lowland forest	NULL
	Polypodiopsida	10	Polypodiales	46	Dryopteridaceae	32	Dryopteris sp.	82	166	Fern/Moss	2	Camp	1	Skip and McGrew, 1977	17	NULL	Maudlow	11	54.9855	-78.8481	55.081	-81.0377	54.1474	-83.8135	46.0959	-111.099	78.9	2	80	temperate lowland forest	2	2. temperate lowland forest	NULL
	Polypodiopsida	10	Gleicheniales	27	Gleicheniaceae	43	Gleichenites sp.	101	227	Fern/Moss	2	Camp	1	Skip and McGrew, 1977	17	NULL	Maudlow	11	54.9855	-78.8481	55.081	-81.0377	54.1474	-83.8135	46.0959	-111.099	78.9	2	80	temperate lowland forest	2	2. temperate lowland forest	NULL
	Pinopsida	9	Pinales	42	Cupressaceae	24	Sequoia dakotensis	225	521	Gymnosperm	3	Camp	1	Skip and McGrew, 1977	17	NULL	Maudlow	11	54.9855	-78.8481	55.081	-81.0377	54.1474	-83.8135	46.0959	-111.099	78.9	2	80	temperate lowland forest	2	2. temperate lowland forest	NULL
	Pinopsida	9	Pinales	42	Cupressaceae	24	Sequoia reichenbachi	225	526	Gymnosperm	3	Camp	1	Skip and McGrew, 1977	17	NULL	Maudlow	11	54.9855	-78.8481	55.081	-81.0377	54.1474	-83.8135	46.0959	-111.099	78.9	2	80	temperate lowland forest	2	2. temperate lowland forest	NULL
	Pinopsida	9	Pinales	42	Araucariaceae	8	Araucarites sp.	16	22	Gymnosperm	3	Camp	1	Skip and McGrew, 1977	17	NULL	Maudlow	11	54.9855	-78.8481	55.081	-81.0377	54.1474	-83.8135	46.0959	-111.099	78.9	2	80	coastal plain	4	4. coastal plain	NULL
	Pinopsida	9	Pinales	42	Araucariaceae	8	Araucarioxylon sp.	15	20	Gymnosperm	3	Camp	1	Skip and McGrew, 1977	17	NULL	Maudlow	11	54.9855	-78.8481	55.081	-81.0377	54.1474	-83.8135	46.0959	-111.099	78.9	2	80	coastal plain	4	4. coastal plain	NULL
	Magnoliopsida	6	Laurales	31	Lauraceae	51	Cinnamomum affine	50	82	Angiosperm	1	Camp	1	Skip and McGrew, 1977	17	NULL	Maudlow	11	54.9855	-78.8481	55.081	-81.0377	54.1474	-83.8135	46.0959	-111.099	78.9	2	80	tropical lowland forest	6	6. tropical lowland forest	NULL
	Magnoliopsida	6	Vitales	61	Vitaceae	96	Cissus marginata	52	93	Angiosperm	1	Camp	1	Skip and McGrew, 1977	17	NULL	Maudlow	11	54.9855	-78.8481	55.081	-81.0377	54.1474	-83.8135	46.0959	-111.099	78.9	2	80	upland forest	1	1. upland forest	NULL
	Magnoliopsida	6	Rosales	51	Moraceae	61	Ficus impressa	92	182	Angiosperm	1	Camp	1	Skip and McGrew, 1977	17	NULL	Maudlow	11	54.9855	-78.8481	55.081	-81.0377	54.1474	-83.8135	46.0959	-111.099	78.9	2	80	tropical lowland forest	6	6. tropical lowland forest	NULL
	Magnoliopsida	6	Proteales	47	Platanaceae	72	Grewiopsis saportana	103	234	Angiosperm	1	Camp	1	Skip and McGrew, 1977	17	NULL	Maudlow	11	54.9855	-78.8481	55.081	-81.0377	54.1474	-83.8135	46.0959	-111.099	78.9	2	80	temperate lowland forest	2	2. temperate lowland forest	NULL
	Magnoliopsida	6	Rosales	51	Rhamnaceae	81	Zizyphus cretaceus	257	583	Angiosperm	1	Camp	1	Skip and McGrew, 1977	17	NULL	Maudlow	11	54.9855	-78.8481	55.081	-81.0377	54.1474	-83.8135	46.0959	-111.099	78.9	2	80	tropical lowland forest	6	6. tropical lowland forest	NULL
	Polypodiopsida	10	Equisetales	19	Equisetaceae	34	Equisetum sp.	87	170	Fern/Moss	2	Camp	1	Van Boskirk, 1998	18	NULL	Eagle	4	53.4529	-76.8818	53.564	-79.0312	52.6476	-81.814	44.9863	-108.869	82	2.1	80	wet, successional	5	5. wet, successional	Alluvial
	Polypodiopsida	10	Equisetales	19	Equisetaceae	34	Equisetum sp.	87	170	Fern/Moss	2	Camp	1	Van Boskirk, 1998	18	NULL	Eagle	4	53.4529	-76.8818	53.564	-79.0312	52.6476	-81.814	44.9863	-108.869	82	2.1	80	wet, successional	5	5. wet, successional	Backswamp
	Polypodiopsida	10	Equisetales	19	Equisetaceae	34	Equisetum sp.	87	170	Fern/Moss	2	Camp	1	Van Boskirk, 1998	18	NULL	Eagle	4	53.4529	-76.8818	53.564	-79.0312	52.6476	-81.814	44.9863	-108.869	82	2.1	80	wet, successional	5	5. wet, successional	Pond
	Polypodiopsida	10	Polypodiales	46	Aspleniaceae	11	Asplenium neomexicana	24	34	Fern/Moss	2	Camp	1	Van Boskirk, 1998	18	NULL	Eagle	4	53.4529	-76.8818	53.564	-79.0312	52.6476	-81.814	44.9863	-108.869	82	2.1	80	tropical lowland forest	6	6. tropical lowland forest	Alluvial
	Polypodiopsida	10	Polypodiales	46	Saccolomataceae	83	Saccoloma gardneri	212	494	Fern/Moss	2	Camp	1	Van Boskirk, 1998	18	NULL	Eagle	4	53.4529	-76.8818	53.564	-79.0312	52.6476	-81.814	44.9863	-108.869	82	2.1	80	tropical lowland forest	6	6. tropical lowland forest	Alluvial
	Polypodiopsida	10	Polypodiales	46	Saccolomataceae	83	Saccoloma gardneri	212	494	Fern/Moss	2	Camp	1	Van Boskirk, 1998	18	NULL	Eagle	4	53.4529	-76.8818	53.564	-79.0312	52.6476	-81.814	44.9863	-108.869	82	2.1	80	tropical lowland forest	6	6. tropical lowland forest	Backswamp
	Polypodiopsida	10	Polypodiales	46	Saccolomataceae	83	Saccoloma gardneri	212	494	Fern/Moss	2	Camp	1	Van Boskirk, 1998	18	NULL	Eagle	4	53.4529	-76.8818	53.564	-79.0312	52.6476	-81.814	44.9863	-108.869	82	2.1	80	tropical lowland forest	6	6. tropical lowland forest	Pond
	Polypodiopsida	10	Polypodiales	46	Blechnaceae	15	Woodwardia crenata	249	572	Fern/Moss	2	Camp	1	Van Boskirk, 1998	18	NULL	Eagle	4	53.4529	-76.8818	53.564	-79.0312	52.6476	-81.814	44.9863	-108.869	82	2.1	80	temperate lowland forest	2	2. temperate lowland forest	Alluvial
	Polypodiopsida	10	Polypodiales	46	Blechnaceae	15	Woodwardia crenata	249	572	Fern/Moss	2	Camp	1	Van Boskirk, 1998	18	NULL	Eagle	4	53.4529	-76.8818	53.564	-79.0312	52.6476	-81.814	44.9863	-108.869	82	2.1	80	temperate lowland forest	2	2. temperate lowland forest	Backswamp
	Polypodiopsida	10	Polypodiales	46	Blechnaceae	15	Woodwardia crenata	249	572	Fern/Moss	2	Camp	1	Van Boskirk, 1998	18	NULL	Eagle	4	53.4529	-76.8818	53.564	-79.0312	52.6476	-81.814	44.9863	-108.869	82	2.1	80	temperate lowland forest	2	2. temperate lowland forest	Pond
	Polypodiopsida	10	Gleicheniales	27	Gleicheniaceae	43	Gleichenites sepulta	101	226	Fern/Moss	2	Camp	1	Van Boskirk, 1998	18	NULL	Eagle	4	53.4529	-76.8818	53.564	-79.0312	52.6476	-81.814	44.9863	-108.869	82	2.1	80	temperate lowland forest	2	2. temperate lowland forest	Backswamp
	Polypodiopsida	10	Gleicheniales	27	Gleicheniaceae	43	Gleichenites sepulta	101	226	Fern/Moss	2	Camp	1	Van Boskirk, 1998	18	NULL	Eagle	4	53.4529	-76.8818	53.564	-79.0312	52.6476	-81.814	44.9863	-108.869	82	2.1	80	temperate lowland forest	2	2. temperate lowland forest	Pond
	Polypodiopsida	10	Osmundales	41	Osmundaceae	67	Cladophlebis sp.	53	94	Fern/Moss	2	Camp	1	Van Boskirk, 1998	18	NULL	Eagle	4	53.4529	-76.8818	53.564	-79.0312	52.6476	-81.814	44.9863	-108.869	82	2.1	80	tropical lowland forest	6	6. tropical lowland forest	Backswamp
	Polypodiopsida	10	Osmundales	41	Osmundaceae	67	Cladophlebis sp.	53	94	Fern/Moss	2	Camp	1	Van Boskirk, 1998	18	NULL	Eagle	4	53.4529	-76.8818	53.564	-79.0312	52.6476	-81.814	44.9863	-108.869	82	2.1	80	tropical lowland forest	6	6. tropical lowland forest	Pond
	Polypodiopsida	10	Schizaeales	56	Schizaeaceae	88	Anemia fremonti	8	9	Fern/Moss	2	Camp	1	Van Boskirk, 1998	18	NULL	Eagle	4	53.4529	-76.8818	53.564	-79.0312	52.6476	-81.814	44.9863	-108.869	82	2.1	80	tropical lowland forest	6	6. tropical lowland forest	Alluvial
	Polypodiopsida	10	Schizaeales	56	Schizaeaceae	88	Anemia fremonti	8	9	Fern/Moss	2	Camp	1	Van Boskirk, 1998	18	NULL	Eagle	4	53.4529	-76.8818	53.564	-79.0312	52.6476	-81.814	44.9863	-108.869	82	2.1	80	tropical lowland forest	6	6. tropical lowland forest	Backswamp
	Polypodiopsida	10	Schizaeales	56	Schizaeaceae	88	Anemia fremonti	8	9	Fern/Moss	2	Camp	1	Van Boskirk, 1998	18	NULL	Eagle	4	53.4529	-76.8818	53.564	-79.0312	52.6476	-81.814	44.9863	-108.869	82	2.1	80	tropical lowland forest	6	6. tropical lowland forest	Pond
	Pinopsida	9	Pinales	42	Araucariaceae	8	Araucarites longifolia	16	21	Gymnosperm	3	Camp	1	Van Boskirk, 1998	18	NULL	Eagle	4	53.4529	-76.8818	53.564	-79.0312	52.6476	-81.814	44.9863	-108.869	82	2.1	80	coastal plain	4	4. coastal plain	Alluvial
	Pinopsida	9	Pinales	42	Araucariaceae	8	Araucarites longifolia	16	21	Gymnosperm	3	Camp	1	Van Boskirk, 1998	18	NULL	Eagle	4	53.4529	-76.8818	53.564	-79.0312	52.6476	-81.814	44.9863	-108.869	82	2.1	80	coastal plain	4	4. coastal plain	Backswamp
	Pinopsida	9	Pinales	42	Araucariaceae	8	Dammara sp.	70	127	Gymnosperm	3	Camp	1	Van Boskirk, 1998	18	NULL	Eagle	4	53.4529	-76.8818	53.564	-79.0312	52.6476	-81.814	44.9863	-108.869	82	2.1	80	temperate lowland forest	2	2. temperate lowland forest	Alluvial
	Pinopsida	9	Pinales	42	Araucariaceae	8	Dammara sp.	70	127	Gymnosperm	3	Camp	1	Van Boskirk, 1998	18	NULL	Eagle	4	53.4529	-76.8818	53.564	-79.0312	52.6476	-81.814	44.9863	-108.869	82	2.1	80	temperate lowland forest	2	2. temperate lowland forest	Backswamp
	Pinopsida	9	Pinales	42	Araucariaceae	8	Araucarites sp.	16	22	Gymnosperm	3	Camp	1	Van Boskirk, 1998	18	NULL	Eagle	4	53.4529	-76.8818	53.564	-79.0312	52.6476	-81.814	44.9863	-108.869	82	2.1	80	coastal plain	4	4. coastal plain	Alluvial
	Pinopsida	9	Pinales	42	Cupressaceae	24	Parataxodium sp.	166	361	Gymnosperm	3	Camp	1	Van Boskirk, 1998	18	NULL	Eagle	4	53.4529	-76.8818	53.564	-79.0312	52.6476	-81.814	44.9863	-108.869	82	2.1	80	wet, successional	5	5. wet, successional	Alluvial
	Pinopsida	9	Pinales	42	Cupressaceae	24	Parataxodium sp.	166	361	Gymnosperm	3	Camp	1	Van Boskirk, 1998	18	NULL	Eagle	4	53.4529	-76.8818	53.564	-79.0312	52.6476	-81.814	44.9863	-108.869	82	2.1	80	wet, successional	5	5. wet, successional	Backswamp
	Pinopsida	9	Pinales	42	Cupressaceae	24	Parataxodium sp.	166	361	Gymnosperm	3	Camp	1	Van Boskirk, 1998	18	NULL	Eagle	4	53.4529	-76.8818	53.564	-79.0312	52.6476	-81.814	44.9863	-108.869	82	2.1	80	wet, successional	5	5. wet, successional	Pond
	Pinopsida	9	Pinales	42	Cupressaceae	24	Glyptostrobus sp.	102	231	Gymnosperm	3	Camp	1	Van Boskirk, 1998	18	NULL	Eagle	4	53.4529	-76.8818	53.564	-79.0312	52.6476	-81.814	44.9863	-108.869	82	2.1	80	swampy, lagoonal	3	3. swampy, lagoonal	Alluvial
	Pinopsida	9	Pinales	42	Cupressaceae	24	Glyptostrobus sp.	102	231	Gymnosperm	3	Camp	1	Van Boskirk, 1998	18	NULL	Eagle	4	53.4529	-76.8818	53.564	-79.0312	52.6476	-81.814	44.9863	-108.869	82	2.1	80	swampy, lagoonal	3	3. swampy, lagoonal	Backswamp
	Pinopsida	9	Pinales	42	Cupressaceae	24	Glyptostrobus sp.	102	231	Gymnosperm	3	Camp	1	Van Boskirk, 1998	18	NULL	Eagle	4	53.4529	-76.8818	53.564	-79.0312	52.6476	-81.814	44.9863	-108.869	82	2.1	80	swampy, lagoonal	3	3. swampy, lagoonal	Pond
	Pinopsida	9	Pinales?	43	Phyllocladaceae?	69	Protophyllocladus subintegrifolius	193	446	Gymnosperm	3	Camp	1	Van Boskirk, 1998	18	NULL	Eagle	4	53.4529	-76.8818	53.564	-79.0312	52.6476	-81.814	44.9863	-108.869	82	2.1	80	temperate lowland forest	2	2. temperate lowland forest	Alluvial
	Pinopsida	9	Pinales?	43	Phyllocladaceae?	69	Protophyllocladus subintegrifolius	193	446	Gymnosperm	3	Camp	1	Van Boskirk, 1998	18	NULL	Eagle	4	53.4529	-76.8818	53.564	-79.0312	52.6476	-81.814	44.9863	-108.869	82	2.1	80	temperate lowland forest	2	2. temperate lowland forest	Backswamp
	Pinopsida	9	Pinales?	43	Phyllocladaceae?	69	Protophyllocladus subintegrifolius	193	446	Gymnosperm	3	Camp	1	Van Boskirk, 1998	18	NULL	Eagle	4	53.4529	-76.8818	53.564	-79.0312	52.6476	-81.814	44.9863	-108.869	82	2.1	80	temperate lowland forest	2	2. temperate lowland forest	Pond
	Pinopsida	9	Pinales	42	Araucariaceae	8	Brachyphyllum crassum	31	44	Gymnosperm	3	Camp	1	Van Boskirk, 1998	18	NULL	Eagle	4	53.4529	-76.8818	53.564	-79.0312	52.6476	-81.814	44.9863	-108.869	82	2.1	80	coastal plain	4	4. coastal plain	Alluvial
	Pinopsida	9	Pinales	42	Cheirolepidiaceae	21	Moriconia sp.	147	329	Gymnosperm	3	Camp	1	Van Boskirk, 1998	18	NULL	Eagle	4	53.4529	-76.8818	53.564	-79.0312	52.6476	-81.814	44.9863	-108.869	82	2.1	80	temperate lowland forest	2	2. temperate lowland forest	Alluvial
	Liliopsida	4	Alismatales	1	Araceae	7	Pistia corrugata	180	384	Angiosperm	1	Camp	1	Van Boskirk, 1998	18	NULL	Eagle	4	53.4529	-76.8818	53.564	-79.0312	52.6476	-81.814	44.9863	-108.869	82	2.1	80	estuarine, aquatic	7	7. estuarine, aquatic	Alluvial
	Liliopsida	4	Alismatales	1	Araceae	7	Pistia corrugata	180	384	Angiosperm	1	Camp	1	Van Boskirk, 1998	18	NULL	Eagle	4	53.4529	-76.8818	53.564	-79.0312	52.6476	-81.814	44.9863	-108.869	82	2.1	80	estuarine, aquatic	7	7. estuarine, aquatic	Pond
	Liliopsida	4	Arecales	3	Arecaceae	9	Sabalites sp.	211	493	Angiosperm	1	Camp	1	Van Boskirk, 1998	18	NULL	Eagle	4	53.4529	-76.8818	53.564	-79.0312	52.6476	-81.814	44.9863	-108.869	82	2.1	80	swampy, lagoonal	3	3. swampy, lagoonal	Alluvial
	Liliopsida	4	Arecales	3	Arecaceae	9	Sabalites sp.	211	493	Angiosperm	1	Camp	1	Van Boskirk, 1998	18	NULL	Eagle	4	53.4529	-76.8818	53.564	-79.0312	52.6476	-81.814	44.9863	-108.869	82	2.1	80	swampy, lagoonal	3	3. swampy, lagoonal	Backswamp
	Bryopsida	1	Bryales	6	Racopilaceae	79	Powellia oblongata	191	441	Angiosperm	1	Camp	1	Van Boskirk, 1998	18	NULL	Eagle	4	53.4529	-76.8818	53.564	-79.0312	52.6476	-81.814	44.9863	-108.869	82	2.1	80	tropical lowland forest	6	6. tropical lowland forest	Alluvial
	Magnoliopsida	6	Canellales	7	Winteraceae	98	Avernalia solida	25	38	Angiosperm	1	Camp	1	Van Boskirk, 1998	18	NULL	Eagle	4	53.4529	-76.8818	53.564	-79.0312	52.6476	-81.814	44.9863	-108.869	82	2.1	80	tropical lowland forest	6	6. tropical lowland forest	Alluvial
	Magnoliopsida	6	Nymphaeales	40	Nymphaeaceae	64	Paranymphaea hastata	165	360	Angiosperm	1	Camp	1	Van Boskirk, 1998	18	NULL	Eagle	4	53.4529	-76.8818	53.564	-79.0312	52.6476	-81.814	44.9863	-108.869	82	2.1	80	estuarine, aquatic	7	7. estuarine, aquatic	Alluvial
	Magnoliopsida	6	Nymphaeales	40	Nymphaeaceae	64	Paranymphaea hastata	165	360	Angiosperm	1	Camp	1	Van Boskirk, 1998	18	NULL	Eagle	4	53.4529	-76.8818	53.564	-79.0312	52.6476	-81.814	44.9863	-108.869	82	2.1	80	estuarine, aquatic	7	7. estuarine, aquatic	Backswamp
	Magnoliopsida	6	Amborellales	2	Amborellaceae	3	Amborellites wyomingensis	3	2	Angiosperm	1	Camp	1	Van Boskirk, 1998	18	NULL	Eagle	4	53.4529	-76.8818	53.564	-79.0312	52.6476	-81.814	44.9863	-108.869	82	2.1	80	unknown	0	0. unknown	Alluvial
	Magnoliopsida	6	Amborellales	2	Amborellaceae	3	Amborellites wyomingensis	3	2	Angiosperm	1	Camp	1	Van Boskirk, 1998	18	NULL	Eagle	4	53.4529	-76.8818	53.564	-79.0312	52.6476	-81.814	44.9863	-108.869	82	2.1	80	unknown	0	0. unknown	Backswamp
	Magnoliopsida	6	Amborellales	2	Amborellaceae	3	Amborellites wyomingensis	3	2	Angiosperm	1	Camp	1	Van Boskirk, 1998	18	NULL	Eagle	4	53.4529	-76.8818	53.564	-79.0312	52.6476	-81.814	44.9863	-108.869	82	2.1	80	unknown	0	0. unknown	Pond
	Magnoliopsida	6	Chloranthales	9	Chloranthaceae	22	Ascarinites eximia	20	28	Angiosperm	1	Camp	1	Van Boskirk, 1998	18	NULL	Eagle	4	53.4529	-76.8818	53.564	-79.0312	52.6476	-81.814	44.9863	-108.869	82	2.1	80	tropical lowland forest	6	6. tropical lowland forest	Alluvial
	Magnoliopsida	6	Chloranthales	9	Chloranthaceae	22	Ascarinites communis	20	27	Angiosperm	1	Camp	1	Van Boskirk, 1998	18	NULL	Eagle	4	53.4529	-76.8818	53.564	-79.0312	52.6476	-81.814	44.9863	-108.869	82	2.1	80	tropical lowland forest	6	6. tropical lowland forest	Alluvial
	Magnoliopsida	6	Chloranthales	9	Chloranthaceae	22	Ascarinites communis	20	27	Angiosperm	1	Camp	1	Van Boskirk, 1998	18	NULL	Eagle	4	53.4529	-76.8818	53.564	-79.0312	52.6476	-81.814	44.9863	-108.869	82	2.1	80	tropical lowland forest	6	6. tropical lowland forest	Backswamp
	Magnoliopsida	6	Chloranthales	9	Chloranthaceae	22	Ascarinites communis	20	27	Angiosperm	1	Camp	1	Van Boskirk, 1998	18	NULL	Eagle	4	53.4529	-76.8818	53.564	-79.0312	52.6476	-81.814	44.9863	-108.869	82	2.1	80	tropical lowland forest	6	6. tropical lowland forest	Pond
	Polypodiopsida	10	Polypodiales	46	Pteridaceae	78	Aquilina grossidentata	11	15	Angiosperm	1	Camp	1	Van Boskirk, 1998	18	NULL	Eagle	4	53.4529	-76.8818	53.564	-79.0312	52.6476	-81.814	44.9863	-108.869	82	2.1	80	temperate lowland forest	2	2. temperate lowland forest	Alluvial
	Magnoliopsida	6	Laurales	31	uncertain	101	Crassidenticulum aquilae	61	110	Angiosperm	1	Camp	1	Van Boskirk, 1998	18	NULL	Eagle	4	53.4529	-76.8818	53.564	-79.0312	52.6476	-81.814	44.9863	-108.869	82	2.1	80	coastal plain	4	4. coastal plain	Alluvial
	Magnoliopsida	6	Laurales	31	uncertain	101	Crassidenticulum aquilae	61	110	Angiosperm	1	Camp	1	Van Boskirk, 1998	18	NULL	Eagle	4	53.4529	-76.8818	53.564	-79.0312	52.6476	-81.814	44.9863	-108.869	82	2.1	80	coastal plain	4	4. coastal plain	Backswamp
	Magnoliopsida	6	Laurales	31	Lauraceae	51	Montania glandulosa	146	327	Angiosperm	1	Camp	1	Van Boskirk, 1998	18	NULL	Eagle	4	53.4529	-76.8818	53.564	-79.0312	52.6476	-81.814	44.9863	-108.869	82	2.1	80	unknown	0	0. unknown	Alluvial
	Magnoliopsida	6	Laurales	31	Lauraceae	51	Montania glandulosa	146	327	Angiosperm	1	Camp	1	Van Boskirk, 1998	18	NULL	Eagle	4	53.4529	-76.8818	53.564	-79.0312	52.6476	-81.814	44.9863	-108.869	82	2.1	80	unknown	0	0. unknown	Backswamp
	Magnoliopsida	6	Laurales	31	Lauraceae	51	Montania glandulosa	146	327	Angiosperm	1	Camp	1	Van Boskirk, 1998	18	NULL	Eagle	4	53.4529	-76.8818	53.564	-79.0312	52.6476	-81.814	44.9863	-108.869	82	2.1	80	unknown	0	0. unknown	Pond
	Magnoliopsida	6	Laurales	31	Lauraceae	51	Weediaphyllum parkensis	245	568	Angiosperm	1	Camp	1	Van Boskirk, 1998	18	NULL	Eagle	4	53.4529	-76.8818	53.564	-79.0312	52.6476	-81.814	44.9863	-108.869	82	2.1	80	tropical lowland forest	6	6. tropical lowland forest	Alluvial
	Magnoliopsida	6	Laurales	31	Lauraceae	51	Weediaphyllum parkensis	245	568	Angiosperm	1	Camp	1	Van Boskirk, 1998	18	NULL	Eagle	4	53.4529	-76.8818	53.564	-79.0312	52.6476	-81.814	44.9863	-108.869	82	2.1	80	tropical lowland forest	6	6. tropical lowland forest	Backswamp
	Magnoliopsida	6	Laurales	31	Lauraceae	51	Weediaphyllum parkensis	245	568	Angiosperm	1	Camp	1	Van Boskirk, 1998	18	NULL	Eagle	4	53.4529	-76.8818	53.564	-79.0312	52.6476	-81.814	44.9863	-108.869	82	2.1	80	tropical lowland forest	6	6. tropical lowland forest	Pond
	Magnoliopsida	6	Laurales	31	Lauraceae	51	Cinnamomum hesperium	50	83	Angiosperm	1	Camp	1	Van Boskirk, 1998	18	NULL	Eagle	4	53.4529	-76.8818	53.564	-79.0312	52.6476	-81.814	44.9863	-108.869	82	2.1	80	tropical lowland forest	6	6. tropical lowland forest	Alluvial
	Magnoliopsida	6	Laurales	31	Lauraceae	51	Laurodaphne lobata	114	262	Angiosperm	1	Camp	1	Van Boskirk, 1998	18	NULL	Eagle	4	53.4529	-76.8818	53.564	-79.0312	52.6476	-81.814	44.9863	-108.869	82	2.1	80	tropical lowland forest	6	6. tropical lowland forest	Alluvial
	Magnoliopsida	6	Laurales	31	Lauraceae	51	Persea hayana	168	363	Angiosperm	1	Camp	1	Van Boskirk, 1998	18	NULL	Eagle	4	53.4529	-76.8818	53.564	-79.0312	52.6476	-81.814	44.9863	-108.869	82	2.1	80	tropical lowland forest	6	6. tropical lowland forest	Alluvial
	Magnoliopsida	6	uncertain	63	uncertain	101	Retinovena fluvialis	201	463	Angiosperm	1	Camp	1	Van Boskirk, 1998	18	NULL	Eagle	4	53.4529	-76.8818	53.564	-79.0312	52.6476	-81.814	44.9863	-108.869	82	2.1	80	coastal plain	4	4. coastal plain	Alluvial
	Magnoliopsida	6	uncertain	63	uncertain	101	Retinovena fluvialis	201	463	Angiosperm	1	Camp	1	Van Boskirk, 1998	18	NULL	Eagle	4	53.4529	-76.8818	53.564	-79.0312	52.6476	-81.814	44.9863	-108.869	82	2.1	80	coastal plain	4	4. coastal plain	Backswamp
	Magnoliopsida	6	uncertain	63	uncertain	101	Retinovena fluvialis	201	463	Angiosperm	1	Camp	1	Van Boskirk, 1998	18	NULL	Eagle	4	53.4529	-76.8818	53.564	-79.0312	52.6476	-81.814	44.9863	-108.869	82	2.1	80	coastal plain	4	4. coastal plain	Pond
	Magnoliopsida	6	Proteales	47	Nelumbonaceae	63	Nelumbago peltata	151	335	Angiosperm	1	Camp	1	Van Boskirk, 1998	18	NULL	Eagle	4	53.4529	-76.8818	53.564	-79.0312	52.6476	-81.814	44.9863	-108.869	82	2.1	80	estuarine, aquatic	7	7. estuarine, aquatic	Alluvial
	Magnoliopsida	6	Proteales	47	Nelumbonaceae	63	Nelumbago peltata	151	335	Angiosperm	1	Camp	1	Van Boskirk, 1998	18	NULL	Eagle	4	53.4529	-76.8818	53.564	-79.0312	52.6476	-81.814	44.9863	-108.869	82	2.1	80	estuarine, aquatic	7	7. estuarine, aquatic	Backswamp
	Magnoliopsida	6	Ranunculales	48	Berberidaceae	12	Semiungula assymetrica	224	518	Angiosperm	1	Camp	1	Van Boskirk, 1998	18	NULL	Eagle	4	53.4529	-76.8818	53.564	-79.0312	52.6476	-81.814	44.9863	-108.869	82	2.1	80	open scrubland	8	8. open scrubland	Alluvial
	Magnoliopsida	6	Ranunculales	48	Berberidaceae	12	Semiungula assymetrica	224	518	Angiosperm	1	Camp	1	Van Boskirk, 1998	18	NULL	Eagle	4	53.4529	-76.8818	53.564	-79.0312	52.6476	-81.814	44.9863	-108.869	82	2.1	80	open scrubland	8	8. open scrubland	Backswamp
	Magnoliopsida	6	Ranunculales	48	Berberidaceae	12	Semiungula assymetrica	224	518	Angiosperm	1	Camp	1	Van Boskirk, 1998	18	NULL	Eagle	4	53.4529	-76.8818	53.564	-79.0312	52.6476	-81.814	44.9863	-108.869	82	2.1	80	open scrubland	8	8. open scrubland	Pond
	Magnoliopsida	6	Ranunculales	48	Berberidaceae	12	Belfria microphylla	26	39	Angiosperm	1	Camp	1	Van Boskirk, 1998	18	NULL	Eagle	4	53.4529	-76.8818	53.564	-79.0312	52.6476	-81.814	44.9863	-108.869	82	2.1	80	temperate lowland forest	2	2. temperate lowland forest	Backswamp
	Magnoliopsida	6	Ranunculales	48	Menispermaceae	60	Menispermaceae, unknown	140	316	Angiosperm	1	Camp	1	Van Boskirk, 1998	18	NULL	Eagle	4	53.4529	-76.8818	53.564	-79.0312	52.6476	-81.814	44.9863	-108.869	82	2.1	80	tropical lowland forest	6	6. tropical lowland forest	Alluvial
	Magnoliopsida	6	Malpighiales	36	Euphorbiaceae	37	Manihotites georgiana	135	309	Angiosperm	1	Camp	1	Van Boskirk, 1998	18	NULL	Eagle	4	53.4529	-76.8818	53.564	-79.0312	52.6476	-81.814	44.9863	-108.869	82	2.1	80	tropical lowland forest	6	6. tropical lowland forest	Alluvial
	Magnoliopsida	6	Trochodendrales/Cercidiphyllales	59	uncertain	101	Trochodendroides sp.	238	547	Angiosperm	1	Camp	1	Van Boskirk, 1998	18	NULL	Eagle	4	53.4529	-76.8818	53.564	-79.0312	52.6476	-81.814	44.9863	-108.869	82	2.1	80	tropical lowland forest	6	6. tropical lowland forest	Alluvial
	Magnoliopsida	6	Trochodendrales/Cercidiphyllales	59	uncertain	101	Trochodendroides sp.	238	547	Angiosperm	1	Camp	1	Van Boskirk, 1998	18	NULL	Eagle	4	53.4529	-76.8818	53.564	-79.0312	52.6476	-81.814	44.9863	-108.869	82	2.1	80	tropical lowland forest	6	6. tropical lowland forest	Backswamp
	Magnoliopsida	6	Trochodendrales/Cercidiphyllales	59	uncertain	101	Trochodendroides sp.	238	547	Angiosperm	1	Camp	1	Van Boskirk, 1998	18	NULL	Eagle	4	53.4529	-76.8818	53.564	-79.0312	52.6476	-81.814	44.9863	-108.869	82	2.1	80	tropical lowland forest	6	6. tropical lowland forest	Pond
	Magnoliopsida	6	Proteales	47	Platanaceae	72	Platanites marginata	182	413	Angiosperm	1	Camp	1	Van Boskirk, 1998	18	NULL	Eagle	4	53.4529	-76.8818	53.564	-79.0312	52.6476	-81.814	44.9863	-108.869	82	2.1	80	temperate lowland forest	2	2. temperate lowland forest	Alluvial
	Magnoliopsida	6	Proteales	47	Platanaceae	72	Platanaceae, unknown	181	395	Angiosperm	1	Camp	1	Van Boskirk, 1998	18	NULL	Eagle	4	53.4529	-76.8818	53.564	-79.0312	52.6476	-81.814	44.9863	-108.869	82	2.1	80	temperate lowland forest	2	2. temperate lowland forest	Alluvial
	Pinopsida	9	Pinales?	43	Phyllocladaceae?	69	Protophyllum sp.	194	447	Angiosperm	1	Camp	1	Van Boskirk, 1998	18	NULL	Eagle	4	53.4529	-76.8818	53.564	-79.0312	52.6476	-81.814	44.9863	-108.869	82	2.1	80	temperate lowland forest	2	2. temperate lowland forest	Alluvial
	uncertain	11	uncertain	63	uncertain	101	Paracredneria cretaceae	164	359	Angiosperm	1	Camp	1	Van Boskirk, 1998	18	NULL	Eagle	4	53.4529	-76.8818	53.564	-79.0312	52.6476	-81.814	44.9863	-108.869	82	2.1	80	temperate lowland forest	2	2. temperate lowland forest	Alluvial
	Magnoliopsida	6	Proteales	47	Platanaceae	72	Platanus primaeva	184	419	Angiosperm	1	Camp	1	Van Boskirk, 1998	18	NULL	Eagle	4	53.4529	-76.8818	53.564	-79.0312	52.6476	-81.814	44.9863	-108.869	82	2.1	80	temperate lowland forest	2	2. temperate lowland forest	Alluvial
	Magnoliopsida	6	Proteales	47	Platanaceae	72	Platanus primaeva	184	419	Angiosperm	1	Camp	1	Van Boskirk, 1998	18	NULL	Eagle	4	53.4529	-76.8818	53.564	-79.0312	52.6476	-81.814	44.9863	-108.869	82	2.1	80	temperate lowland forest	2	2. temperate lowland forest	Backswamp
	Magnoliopsida	6	Fagales	22	Fagaceae	39	Quercus stantonii	197	458	Angiosperm	1	Camp	1	Van Boskirk, 1998	18	NULL	Eagle	4	53.4529	-76.8818	53.564	-79.0312	52.6476	-81.814	44.9863	-108.869	82	2.1	80	temperate lowland forest	2	2. temperate lowland forest	Alluvial
	Magnoliopsida	6	Fagales	22	Fagaceae	39	Quercus stantonii	197	458	Angiosperm	1	Camp	1	Van Boskirk, 1998	18	NULL	Eagle	4	53.4529	-76.8818	53.564	-79.0312	52.6476	-81.814	44.9863	-108.869	82	2.1	80	temperate lowland forest	2	2. temperate lowland forest	Backswamp
	Magnoliopsida	6	uncertain	63	uncertain	101	Anceptophyllum pulcram	6	6	Angiosperm	1	Camp	1	Van Boskirk, 1998	18	NULL	Eagle	4	53.4529	-76.8818	53.564	-79.0312	52.6476	-81.814	44.9863	-108.869	82	2.1	80	unknown	0	0. unknown	Alluvial
	Magnoliopsida	6	uncertain	63	uncertain	101	Anceptophyllum pulcram	6	6	Angiosperm	1	Camp	1	Van Boskirk, 1998	18	NULL	Eagle	4	53.4529	-76.8818	53.564	-79.0312	52.6476	-81.814	44.9863	-108.869	82	2.1	80	unknown	0	0. unknown	Backswamp
	Magnoliopsida	6	uncertain	63	uncertain	101	Anceptophyllum pulcram	6	6	Angiosperm	1	Camp	1	Van Boskirk, 1998	18	NULL	Eagle	4	53.4529	-76.8818	53.564	-79.0312	52.6476	-81.814	44.9863	-108.869	82	2.1	80	unknown	0	0. unknown	Pond
	Magnoliopsida	6	Saxifragales	55	Hamamelidaceae	46	Hamamelidales, unknown spp.	104	236	Angiosperm	1	Camp	1	Van Boskirk, 1998	18	NULL	Eagle	4	53.4529	-76.8818	53.564	-79.0312	52.6476	-81.814	44.9863	-108.869	82	2.1	80	coastal plain	4	4. coastal plain	Alluvial
	Magnoliopsida	6	Magnoliales?	35	uncertain	101	Quereuxia angulata	198	460	Angiosperm	1	Camp	1	Van Boskirk, 1998	18	NULL	Eagle	4	53.4529	-76.8818	53.564	-79.0312	52.6476	-81.814	44.9863	-108.869	82	2.1	80	estuarine, aquatic	7	7. estuarine, aquatic	Alluvial
	Magnoliopsida	6	Magnoliales?	35	uncertain	101	Quereuxia angulata	198	460	Angiosperm	1	Camp	1	Van Boskirk, 1998	18	NULL	Eagle	4	53.4529	-76.8818	53.564	-79.0312	52.6476	-81.814	44.9863	-108.869	82	2.1	80	estuarine, aquatic	7	7. estuarine, aquatic	Pond
	Magnoliopsida	6	Saxifragales	55	uncertain	101	Saxifragales, unknown	221	514	Angiosperm	1	Camp	1	Van Boskirk, 1998	18	NULL	Eagle	4	53.4529	-76.8818	53.564	-79.0312	52.6476	-81.814	44.9863	-108.869	82	2.1	80	unknown	0	0. unknown	Alluvial
	Magnoliopsida	6	Fagales	22	Fagaceae	39	Dryophyllum polymorphum	81	161	Angiosperm	1	Camp	1	Van Boskirk, 1998	18	NULL	Eagle	4	53.4529	-76.8818	53.564	-79.0312	52.6476	-81.814	44.9863	-108.869	82	2.1	80	temperate lowland forest	2	2. temperate lowland forest	Alluvial
	Magnoliopsida	6	Fagales	22	Fagaceae	39	Dryophyllum polymorphum	81	161	Angiosperm	1	Camp	1	Van Boskirk, 1998	18	NULL	Eagle	4	53.4529	-76.8818	53.564	-79.0312	52.6476	-81.814	44.9863	-108.869	82	2.1	80	temperate lowland forest	2	2. temperate lowland forest	Backswamp
	Magnoliopsida	6	Fagales	22	Fagaceae	39	Dryophyllum polymorphum	81	161	Angiosperm	1	Camp	1	Van Boskirk, 1998	18	NULL	Eagle	4	53.4529	-76.8818	53.564	-79.0312	52.6476	-81.814	44.9863	-108.869	82	2.1	80	temperate lowland forest	2	2. temperate lowland forest	Pond
	Magnoliopsida	6	Cornales	11	uncertain	101	Lesterwardia palustris	120	281	Angiosperm	1	Camp	1	Van Boskirk, 1998	18	NULL	Eagle	4	53.4529	-76.8818	53.564	-79.0312	52.6476	-81.814	44.9863	-108.869	82	2.1	80	swampy, lagoonal	3	3. swampy, lagoonal	Backswamp
	Magnoliopsida	6	Cornales	11	uncertain	101	Lesterwardia palustris	120	281	Angiosperm	1	Camp	1	Van Boskirk, 1998	18	NULL	Eagle	4	53.4529	-76.8818	53.564	-79.0312	52.6476	-81.814	44.9863	-108.869	82	2.1	80	swampy, lagoonal	3	3. swampy, lagoonal	Pond
	Magnoliopsida	6	Cornales	11	uncertain	101	Sokophyllum dentatum	227	529	Angiosperm	1	Camp	1	Van Boskirk, 1998	18	NULL	Eagle	4	53.4529	-76.8818	53.564	-79.0312	52.6476	-81.814	44.9863	-108.869	82	2.1	80	swampy, lagoonal	3	3. swampy, lagoonal	Alluvial
	Magnoliopsida	6	Celastrales	8	Celastraceae	18	Celastrophyllum gyminaefolium	42	67	Angiosperm	1	Camp	1	Van Boskirk, 1998	18	NULL	Eagle	4	53.4529	-76.8818	53.564	-79.0312	52.6476	-81.814	44.9863	-108.869	82	2.1	80	tropical lowland forest	6	6. tropical lowland forest	Alluvial
	Magnoliopsida	6	Celastrales	8	Celastraceae	18	Celastrophyllum gyminaefolium	42	67	Angiosperm	1	Camp	1	Van Boskirk, 1998	18	NULL	Eagle	4	53.4529	-76.8818	53.564	-79.0312	52.6476	-81.814	44.9863	-108.869	82	2.1	80	tropical lowland forest	6	6. tropical lowland forest	Pond
	Magnoliopsida	6	Magnoliales?	35	Magnoliaceae?	56	Magnoliopsida, unknown spp.	132	305	Angiosperm	1	Camp	1	Van Boskirk, 1998	18	NULL	Eagle	4	53.4529	-76.8818	53.564	-79.0312	52.6476	-81.814	44.9863	-108.869	82	2.1	80	unknown	0	0. unknown	Alluvial
	Magnoliopsida	6	Laurales	31	Lauraceae	51	Laurales, unknown spp.	112	259	Angiosperm	1	Camp	1	Van Boskirk, 1998	18	NULL	Eagle	4	53.4529	-76.8818	53.564	-79.0312	52.6476	-81.814	44.9863	-108.869	82	2.1	80	tropical lowland forest	6	6. tropical lowland forest	Alluvial
	Magnoliopsida	6	Laurales	31	Lauraceae	51	Lauraceae, unknown spp.	111	246	Angiosperm	1	Camp	1	Van Boskirk, 1998	18	NULL	Eagle	4	53.4529	-76.8818	53.564	-79.0312	52.6476	-81.814	44.9863	-108.869	82	2.1	80	tropical lowland forest	6	6. tropical lowland forest	Alluvial
	Magnoliopsida	6	Magnoliales	34	Magnoliaceae	55	Magnoliales, unknown	129	303	Angiosperm	1	Camp	1	Van Boskirk, 1998	18	NULL	Eagle	4	53.4529	-76.8818	53.564	-79.0312	52.6476	-81.814	44.9863	-108.869	82	2.1	80	tropical lowland forest	6	6. tropical lowland forest	Pond
	Pinopsida	9	Pinales?	43	Cupressaceae	24	Pinales?, unknown	174	379	Gymnosperm	3	Camp	1	Van Boskirk, 1998	18	NULL	Eagle	4	53.4529	-76.8818	53.564	-79.0312	52.6476	-81.814	44.9863	-108.869	82	2.1	80	unknown	0	0. unknown	Alluvial
	Pinopsida	9	Pinales	42	Cupressaceae	24	Cupressaceae(Taxodiaceae), unknown	63	115	Gymnosperm	3	Camp	1	Van Boskirk, 1998	18	NULL	Eagle	4	53.4529	-76.8818	53.564	-79.0312	52.6476	-81.814	44.9863	-108.869	82	2.1	80	temperate lowland forest	2	2. temperate lowland forest	Alluvial
	Pinopsida	9	Pinales	42	Cupressaceae	24	Cupressaceae(Taxodiaceae), unknown	63	115	Gymnosperm	3	Camp	1	Van Boskirk, 1998	18	NULL	Eagle	4	53.4529	-76.8818	53.564	-79.0312	52.6476	-81.814	44.9863	-108.869	82	2.1	80	temperate lowland forest	2	2. temperate lowland forest	Backswamp
	Pinopsida	9	Pinales	42	Cupressaceae	24	Cupressaceae(Taxodiaceae), unknown	63	115	Gymnosperm	3	Camp	1	Van Boskirk, 1998	18	NULL	Eagle	4	53.4529	-76.8818	53.564	-79.0312	52.6476	-81.814	44.9863	-108.869	82	2.1	80	temperate lowland forest	2	2. temperate lowland forest	Pond
	Polypodiopsida	10	Filicales	23	uncertain	101	Filicales, unknown	93	206	Angiosperm	1	Camp	1	Van Boskirk, 1998	18	NULL	Eagle	4	53.4529	-76.8818	53.564	-79.0312	52.6476	-81.814	44.9863	-108.869	82	2.1	80	unknown	0	0. unknown	Backswamp
	Polypodiopsida	10	Polypodiales	46	Aspleniaceae	11	Aspleniaceae, unknown	22	31	Angiosperm	1	Camp	1	Van Boskirk, 1998	18	NULL	Eagle	4	53.4529	-76.8818	53.564	-79.0312	52.6476	-81.814	44.9863	-108.869	82	2.1	80	tropical lowland forest	6	6. tropical lowland forest	Backswamp
	Polypodiopsida	10	Polypodiales	46	Aspleniaceae	11	Aspleniaceae, unknown	22	31	Angiosperm	1	Camp	1	Van Boskirk, 1998	18	NULL	Eagle	4	53.4529	-76.8818	53.564	-79.0312	52.6476	-81.814	44.9863	-108.869	82	2.1	80	tropical lowland forest	6	6. tropical lowland forest	Pond
	Magnoliopsida	6	Vitales	61	Vitaceae	96	Vitis stantonii	244	567	Angiosperm	1	Maas	2	Arens and Allen, 2014	1	27	Hell Creek	8	55.5301	-73.311	55.669	-75.4979	54.7849	-78.4142	47.6139	-106.977	66.85	0.85	65	temperate lowland forest	2	2. temperate lowland forest	NULL
	Magnoliopsida	6	Fagales	22	Fagaceae	39	Dryophyllum subfalcatum	81	163	Angiosperm	1	Maas	2	Arens and Allen, 2014	1	19	Hell Creek	8	55.5301	-73.311	55.669	-75.4979	54.7849	-78.4142	47.6139	-106.977	66.85	0.85	65	temperate lowland forest	2	2. temperate lowland forest	NULL
	Magnoliopsida	6	Celastrales	8	Celastraceae	18	Celastrus taurinensis	43	70	Angiosperm	1	Maas	2	Arens and Allen, 2014	1	10	Hell Creek	8	55.5301	-73.311	55.669	-75.4979	54.7849	-78.4142	47.6139	-106.977	66.85	0.85	65	tropical lowland forest	6	6. tropical lowland forest	NULL
	Pinopsida	9	Pinales	42	Cupressaceae	24	Metasequoia occidentallis	144	324	Gymnosperm	3	Maas	2	Arens and Allen, 2014	1	8	Hell Creek	8	55.5301	-73.311	55.669	-75.4979	54.7849	-78.4142	47.6139	-106.977	66.85	0.85	65	temperate lowland forest	2	2. temperate lowland forest	NULL
	Magnoliopsida	6	Proteales	47	Platanaceae	72	Platanophyllum sp.	183	415	Angiosperm	1	Maas	2	Arens and Allen, 2014	1	8	Hell Creek	8	55.5301	-73.311	55.669	-75.4979	54.7849	-78.4142	47.6139	-106.977	66.85	0.85	65	temperate lowland forest	2	2. temperate lowland forest	NULL
	Magnoliopsida	6	Saxifragales	55	Hamamelidaceae?	47	Leepierceia preartocarpoides	117	277	Angiosperm	1	Maas	2	Arens and Allen, 2014	1	8	Hell Creek	8	55.5301	-73.311	55.669	-75.4979	54.7849	-78.4142	47.6139	-106.977	66.85	0.85	65	coastal plain	4	4. coastal plain	NULL
	uncertain	11	uncertain	63	uncertain	101	Erlingdorfia montana	89	172	Angiosperm	1	Maas	2	Arens and Allen, 2014	1	3	Hell Creek	8	55.5301	-73.311	55.669	-75.4979	54.7849	-78.4142	47.6139	-106.977	66.85	0.85	65	coastal plain	4	4. coastal plain	NULL
	Pinopsida	9	Pinales	42	Cupressaceae	24	Glyptostrobus europaeus	102	229	Gymnosperm	3	Maas	2	Arens and Allen, 2014	1	2	Hell Creek	8	55.5301	-73.311	55.669	-75.4979	54.7849	-78.4142	47.6139	-106.977	66.85	0.85	65	swampy, lagoonal	3	3. swampy, lagoonal	NULL
	Magnoliopsida	6	Fagales	22	Betulaceae	13	Betula perantigua	28	41	Angiosperm	1	Maas	2	Arens and Allen, 2014	1	2	Hell Creek	8	55.5301	-73.311	55.669	-75.4979	54.7849	-78.4142	47.6139	-106.977	66.85	0.85	65	temperate lowland forest	2	2. temperate lowland forest	NULL
	Ginkgoopsida	3	Ginkgoales	26	Ginkgoaceae	42	Ginkgo adiantoides	100	223	Gymnosperm	3	Maas	2	Arens and Allen, 2014	1	1	Hell Creek	8	55.5301	-73.311	55.669	-75.4979	54.7849	-78.4142	47.6139	-106.977	66.85	0.85	65	temperate lowland forest	2	2. temperate lowland forest	NULL
	Pinopsida	9	Pinales	42	Cheirolepidiaceae	21	Cupressinocladus interruptus	64	119	Gymnosperm	3	Maas	2	Arens and Allen, 2014	1	1	Hell Creek	8	55.5301	-73.311	55.669	-75.4979	54.7849	-78.4142	47.6139	-106.977	66.85	0.85	65	temperate lowland forest	2	2. temperate lowland forest	NULL
	Magnoliopsida	6	Rosales	51	Moraceae	61	Artocarpus sp.	19	26	Angiosperm	1	Maas	2	Arens and Allen, 2014	1	1	Hell Creek	8	55.5301	-73.311	55.669	-75.4979	54.7849	-78.4142	47.6139	-106.977	66.85	0.85	65	tropical lowland forest	6	6. tropical lowland forest	NULL
	Magnoliopsida	6	Chloranthales	9	Chloranthaceae	22	Sarcandra sp.	218	508	Angiosperm	1	Maas	2	Arens and Allen, 2014	1	1	Hell Creek	8	55.5301	-73.311	55.669	-75.4979	54.7849	-78.4142	47.6139	-106.977	66.85	0.85	65	tropical lowland forest	6	6. tropical lowland forest	NULL
	Magnoliopsida	6	Proteales	47	Platanaceae	72	Grewiopsis mclearni	103	233	Angiosperm	1	Maas	2	Arens and Allen, 2014	1	1	Hell Creek	8	55.5301	-73.311	55.669	-75.4979	54.7849	-78.4142	47.6139	-106.977	66.85	0.85	65	tropical lowland forest	6	6. tropical lowland forest	NULL
	Magnoliopsida	6	Rosales	51	Rhamnaceae	81	Zizyphoides sp.	256	582	Angiosperm	1	Maas	2	Arens and Allen, 2014	1	1	Hell Creek	8	55.5301	-73.311	55.669	-75.4979	54.7849	-78.4142	47.6139	-106.977	66.85	0.85	65	tropical lowland forest	6	6. tropical lowland forest	NULL
	Magnoliopsida	6	Laurales	31	Lauraceae	51	Laurophyllum cf. L. lanceolatum	115	263	Angiosperm	1	Maas	2	Arens and Allen, 2014	1	1	Hell Creek	8	55.5301	-73.311	55.669	-75.4979	54.7849	-78.4142	47.6139	-106.977	66.85	0.85	65	tropical lowland forest	6	6. tropical lowland forest	NULL
	Polypodiopsida	10	Polypodiales	46	Davalliaceae	29	Davallia tenuifolia	72	129	Fern/Moss	2	Maas	2	Dawson, 1886	3	NULL	Belly River	2	60.2797	-79.4079	60.3702	-81.7467	59.4303	-84.6515	51.0187	-114.081	70.1	5.1	70	tropical lowland forest	6	6. tropical lowland forest	Western Area
	Polypodiopsida	10	Equisetales	19	Equisetaceae	34	Equisetum sp.	87	170	Fern/Moss	2	Maas	2	Dawson, 1886	3	NULL	Belly River	2	60.2797	-79.4079	60.3702	-81.7467	59.4303	-84.6515	51.0187	-114.081	70.1	5.1	70	wet, successional	5	5. wet, successional	Western Area
	Pinopsida	9	Pinales	42	Cupressaceae	24	Thuja interrupta	234	539	Gymnosperm	3	Maas	2	Dawson, 1886	3	NULL	Belly River	2	60.2797	-79.4079	60.3702	-81.7467	59.4303	-84.6515	51.0187	-114.081	70.1	5.1	70	temperate lowland forest	2	2. temperate lowland forest	Western Area
	Pinopsida	9	Pinales	42	Cupressaceae	24	Sequoia nordenskioldii	225	524	Gymnosperm	3	Maas	2	Dawson, 1886	3	NULL	Belly River	2	60.2797	-79.4079	60.3702	-81.7467	59.4303	-84.6515	51.0187	-114.081	70.1	5.1	70	temperate lowland forest	2	2. temperate lowland forest	Western Area
	Pinopsida	9	Pinales	42	Cupressaceae	24	Glyptostrobus europeus	102	230	Gymnosperm	3	Maas	2	Dawson, 1886	3	NULL	Belly River	2	60.2797	-79.4079	60.3702	-81.7467	59.4303	-84.6515	51.0187	-114.081	70.1	5.1	70	swampy, lagoonal	3	3. swampy, lagoonal	Western Area
	Pinopsida	9	Pinales	42	Cupressaceae	24	Taxodium occidentale	231	535	Gymnosperm	3	Maas	2	Dawson, 1886	3	NULL	Belly River	2	60.2797	-79.4079	60.3702	-81.7467	59.4303	-84.6515	51.0187	-114.081	70.1	5.1	70	wet, successional	5	5. wet, successional	Western Area
	Ginkgoopsida	3	Ginkgoales	26	Ginkgoaceae	42	Salisburia sp.	213	495	Gymnosperm	3	Maas	2	Dawson, 1886	3	NULL	Belly River	2	60.2797	-79.4079	60.3702	-81.7467	59.4303	-84.6515	51.0187	-114.081	70.1	5.1	70	temperate lowland forest	2	2. temperate lowland forest	Western Area
	Liliopsida	4	Alismatales	1	Araceae	7	Lemna scutata	119	280	Angiosperm	1	Maas	2	Dawson, 1886	3	NULL	Belly River	2	60.2797	-79.4079	60.3702	-81.7467	59.4303	-84.6515	51.0187	-114.081	70.1	5.1	70	estuarine, aquatic	7	7. estuarine, aquatic	Western Area
	Liliopsida	4	Poales	45	Poaceae	73	Phragmites sp.	171	367	Angiosperm	1	Maas	2	Dawson, 1886	3	NULL	Belly River	2	60.2797	-79.4079	60.3702	-81.7467	59.4303	-84.6515	51.0187	-114.081	70.1	5.1	70	estuarine, aquatic	7	7. estuarine, aquatic	Western Area
	Magnoliopsida	6	Laurales	31	Lauraceae	51	Sassafras burpeanum	219	509	Angiosperm	1	Maas	2	Dawson, 1886	3	NULL	Belly River	2	60.2797	-79.4079	60.3702	-81.7467	59.4303	-84.6515	51.0187	-114.081	70.1	5.1	70	temperate lowland forest	2	2. temperate lowland forest	Western Area
	Liliopsida	4	Poales	45	Cyperaceae	27	Scirpus sp.	222	515	Angiosperm	1	Maas	2	Dawson, 1886	3	NULL	Belly River	2	60.2797	-79.4079	60.3702	-81.7467	59.4303	-84.6515	51.0187	-114.081	70.1	5.1	70	estuarine, aquatic	7	7. estuarine, aquatic	Western Area
	Magnoliopsida	6	Proteales	47	Platanaceae	72	Platanus nobilis	184	418	Angiosperm	1	Maas	2	Dawson, 1886	3	NULL	Belly River	2	60.2797	-79.4079	60.3702	-81.7467	59.4303	-84.6515	51.0187	-114.081	70.1	5.1	70	temperate lowland forest	2	2. temperate lowland forest	Western Area
	Magnoliopsida	6	Proteales	47	Platanaceae	72	Platanus raynoldsii	184	420	Angiosperm	1	Maas	2	Dawson, 1886	3	NULL	Belly River	2	60.2797	-79.4079	60.3702	-81.7467	59.4303	-84.6515	51.0187	-114.081	70.1	5.1	70	temperate lowland forest	2	2. temperate lowland forest	Western Area
	Magnoliopsida	6	Proteales	47	Platanaceae	72	Platanus haydenii	184	417	Angiosperm	1	Maas	2	Dawson, 1886	3	NULL	Belly River	2	60.2797	-79.4079	60.3702	-81.7467	59.4303	-84.6515	51.0187	-114.081	70.1	5.1	70	temperate lowland forest	2	2. temperate lowland forest	Western Area
	Magnoliopsida	6	Fagales	22	Betulaceae	13	Corylus rostrata	60	109	Angiosperm	1	Maas	2	Dawson, 1886	3	NULL	Belly River	2	60.2797	-79.4079	60.3702	-81.7467	59.4303	-84.6515	51.0187	-114.081	70.1	5.1	70	temperate lowland forest	2	2. temperate lowland forest	Western Area
	Magnoliopsida	6	Fagales	22	Betulaceae	13	Corylus mcquarrii	60	108	Angiosperm	1	Maas	2	Dawson, 1886	3	NULL	Belly River	2	60.2797	-79.4079	60.3702	-81.7467	59.4303	-84.6515	51.0187	-114.081	70.1	5.1	70	temperate lowland forest	2	2. temperate lowland forest	Western Area
	Magnoliopsida	6	Malpighiales	36	Salicaceae	84	Populus genetrix	189	432	Angiosperm	1	Maas	2	Dawson, 1886	3	NULL	Belly River	2	60.2797	-79.4079	60.3702	-81.7467	59.4303	-84.6515	51.0187	-114.081	70.1	5.1	70	wet, successional	5	5. wet, successional	Western Area
	Magnoliopsida	6	Malpighiales	36	Salicaceae	84	Populus Acerifolia	189	426	Angiosperm	1	Maas	2	Dawson, 1886	3	NULL	Belly River	2	60.2797	-79.4079	60.3702	-81.7467	59.4303	-84.6515	51.0187	-114.081	70.1	5.1	70	wet, successional	5	5. wet, successional	Western Area
	Magnoliopsida	6	Malpighiales	36	Salicaceae	84	Populus Richardsonii	189	427	Angiosperm	1	Maas	2	Dawson, 1886	3	NULL	Belly River	2	60.2797	-79.4079	60.3702	-81.7467	59.4303	-84.6515	51.0187	-114.081	70.1	5.1	70	wet, successional	5	5. wet, successional	Western Area
	Magnoliopsida	6	Rosales	51	Ulmaceae	93	Ulmus Praecursor	241	550	Angiosperm	1	Maas	2	Dawson, 1886	3	NULL	Belly River	2	60.2797	-79.4079	60.3702	-81.7467	59.4303	-84.6515	51.0187	-114.081	70.1	5.1	70	temperate lowland forest	2	2. temperate lowland forest	Western Area
	Magnoliopsida	6	Dipsacales	17	Adoxaceae	2	Viburnum asperum	243	557	Angiosperm	1	Maas	2	Dawson, 1886	3	NULL	Belly River	2	60.2797	-79.4079	60.3702	-81.7467	59.4303	-84.6515	51.0187	-114.081	70.1	5.1	70	temperate lowland forest	2	2. temperate lowland forest	Western Area
	Magnoliopsida	6	Dipsacales	17	Adoxaceae	2	Viburnum calgarianum	243	558	Angiosperm	1	Maas	2	Dawson, 1886	3	NULL	Belly River	2	60.2797	-79.4079	60.3702	-81.7467	59.4303	-84.6515	51.0187	-114.081	70.1	5.1	70	temperate lowland forest	2	2. temperate lowland forest	Western Area
	Magnoliopsida	6	Dipsacales	17	Adoxaceae	2	Viburnum oxycoccoides	243	562	Angiosperm	1	Maas	2	Dawson, 1886	3	NULL	Belly River	2	60.2797	-79.4079	60.3702	-81.7467	59.4303	-84.6515	51.0187	-114.081	70.1	5.1	70	temperate lowland forest	2	2. temperate lowland forest	Western Area
	Magnoliopsida	6	Dipsacales	17	Adoxaceae	2	Viburnum lanceollatum	243	559	Angiosperm	1	Maas	2	Dawson, 1886	3	NULL	Belly River	2	60.2797	-79.4079	60.3702	-81.7467	59.4303	-84.6515	51.0187	-114.081	70.1	5.1	70	temperate lowland forest	2	2. temperate lowland forest	Western Area
	Magnoliopsida	6	Lamiales	30	Bignoniaceae	14	Catalpa crassifolia	40	64	Angiosperm	1	Maas	2	Dawson, 1886	3	NULL	Belly River	2	60.2797	-79.4079	60.3702	-81.7467	59.4303	-84.6515	51.0187	-114.081	70.1	5.1	70	tropical lowland forest	6	6. tropical lowland forest	Western Area
	Magnoliopsida	6	uncertain	63	uncertain	101	Symphorocarpophyllum Linnaeiforme	229	533	Angiosperm	1	Maas	2	Dawson, 1886	3	NULL	Belly River	2	60.2797	-79.4079	60.3702	-81.7467	59.4303	-84.6515	51.0187	-114.081	70.1	5.1	70	temperate lowland forest	2	2. temperate lowland forest	Western Area
	Magnoliopsida	6	Saxifragales	55	Cercidiphyllaceae	20	Carya antiquorum	36	59	Angiosperm	1	Maas	2	Dawson, 1886	3	NULL	Belly River	2	60.2797	-79.4079	60.3702	-81.7467	59.4303	-84.6515	51.0187	-114.081	70.1	5.1	70	temperate lowland forest	2	2. temperate lowland forest	Western Area
	Magnoliopsida	6	Fagales	22	Juglandaceae	50	Juglans rugosa	110	244	Angiosperm	1	Maas	2	Dawson, 1886	3	NULL	Belly River	2	60.2797	-79.4079	60.3702	-81.7467	59.4303	-84.6515	51.0187	-114.081	70.1	5.1	70	temperate lowland forest	2	2. temperate lowland forest	Western Area
	Magnoliopsida	6	Fagales	22	Juglandaceae	50	Juglans rhamnoides	110	243	Angiosperm	1	Maas	2	Dawson, 1886	3	NULL	Belly River	2	60.2797	-79.4079	60.3702	-81.7467	59.4303	-84.6515	51.0187	-114.081	70.1	5.1	70	temperate lowland forest	2	2. temperate lowland forest	Western Area
	Magnoliopsida	6	Myrtales	39	Lythraceae	54	Trapa borealis	235	540	Angiosperm	1	Maas	2	Dawson, 1886	3	NULL	Belly River	2	60.2797	-79.4079	60.3702	-81.7467	59.4303	-84.6515	51.0187	-114.081	70.1	5.1	70	estuarine, aquatic	7	7. estuarine, aquatic	Western Area
	Magnoliopsida	6	Myrtales	39	Lythraceae	54	Trapa microphylla	235	542	Angiosperm	1	Maas	2	Dawson, 1886	3	NULL	Belly River	2	60.2797	-79.4079	60.3702	-81.7467	59.4303	-84.6515	51.0187	-114.081	70.1	5.1	70	estuarine, aquatic	7	7. estuarine, aquatic	Western Area
	Magnoliopsida	6	Lamiales	30	Oleaceae	65	Phyllites Venosus	172	368	Angiosperm	1	Maas	2	Dawson, 1886	3	NULL	Belly River	2	60.2797	-79.4079	60.3702	-81.7467	59.4303	-84.6515	51.0187	-114.081	70.1	5.1	70	unknown	0	0. unknown	Western Area
	uncertain	11	uncertain	63	uncertain	101	Carpolithes sp.	35	58	Angiosperm	1	Maas	2	Dawson, 1886	3	NULL	Belly River	2	60.2797	-79.4079	60.3702	-81.7467	59.4303	-84.6515	51.0187	-114.081	70.1	5.1	70	temperate lowland forest	2	2. temperate lowland forest	Western Area
	Polypodiopsida	10	Polypodiales	46	Onocleaceae	66	Onoclea sensibilis	157	349	Fern/Moss	2	Maas	2	Dawson, 1886	3	NULL	Belly River	2	57.4463	-70.2462	57.6084	-72.4695	56.7546	-75.5175	49.9931	-105.559	70.1	5.1	70	wet, successional	5	5. wet, successional	Eastern Area
	Polypodiopsida	10	Equisetales	19	Equisetaceae	34	Equisetum sp.	87	170	Fern/Moss	2	Maas	2	Dawson, 1886	3	NULL	Belly River	2	57.4463	-70.2462	57.6084	-72.4695	56.7546	-75.5175	49.9931	-105.559	70.1	5.1	70	wet, successional	5	5. wet, successional	Eastern Area
	Pinopsida	9	Pinales	42	Cupressaceae	24	Sequoia nordenskioldii	225	524	Gymnosperm	3	Maas	2	Dawson, 1886	3	NULL	Belly River	2	57.4463	-70.2462	57.6084	-72.4695	56.7546	-75.5175	49.9931	-105.559	70.1	5.1	70	temperate lowland forest	2	2. temperate lowland forest	Eastern Area
	Pinopsida	9	Pinales	42	Cupressaceae	24	Taxodium occidentale	231	535	Gymnosperm	3	Maas	2	Dawson, 1886	3	NULL	Belly River	2	57.4463	-70.2462	57.6084	-72.4695	56.7546	-75.5175	49.9931	-105.559	70.1	5.1	70	wet, successional	5	5. wet, successional	Eastern Area
	Pinopsida	9	Pinales?	43	uncertain	101	Taxites olrikii	230	534	Gymnosperm	3	Maas	2	Dawson, 1886	3	NULL	Belly River	2	57.4463	-70.2462	57.6084	-72.4695	56.7546	-75.5175	49.9931	-105.559	70.1	5.1	70	unknown	0	0. unknown	Eastern Area
	Ginkgoopsida	3	Ginkgoales	26	Ginkgoaceae	42	Salisburia sp.	213	495	Gymnosperm	3	Maas	2	Dawson, 1886	3	NULL	Belly River	2	57.4463	-70.2462	57.6084	-72.4695	56.7546	-75.5175	49.9931	-105.559	70.1	5.1	70	temperate lowland forest	2	2. temperate lowland forest	Eastern Area
	Liliopsida	4	Alismatales	1	Araceae	7	Lemna scutata	119	280	Angiosperm	1	Maas	2	Dawson, 1886	3	NULL	Belly River	2	57.4463	-70.2462	57.6084	-72.4695	56.7546	-75.5175	49.9931	-105.559	70.1	5.1	70	estuarine, aquatic	7	7. estuarine, aquatic	Eastern Area
	Liliopsida	4	Poales	45	Poaceae	73	Phragmites Sp.	171	366	Angiosperm	1	Maas	2	Dawson, 1886	3	NULL	Belly River	2	57.4463	-70.2462	57.6084	-72.4695	56.7546	-75.5175	49.9931	-105.559	70.1	5.1	70	estuarine, aquatic	7	7. estuarine, aquatic	Eastern Area
	Liliopsida	4	Poales	45	Cyperaceae	27	Scirpus sp.	222	515	Angiosperm	1	Maas	2	Dawson, 1886	3	NULL	Belly River	2	57.4463	-70.2462	57.6084	-72.4695	56.7546	-75.5175	49.9931	-105.559	70.1	5.1	70	estuarine, aquatic	7	7. estuarine, aquatic	Eastern Area
	Magnoliopsida	6	Proteales	47	Platanaceae	72	Platanus nobilis	184	418	Angiosperm	1	Maas	2	Dawson, 1886	3	NULL	Belly River	2	57.4463	-70.2462	57.6084	-72.4695	56.7546	-75.5175	49.9931	-105.559	70.1	5.1	70	temperate lowland forest	2	2. temperate lowland forest	Eastern Area
	Magnoliopsida	6	Fagales	22	Fagaceae	39	Castanea sp	39	63	Angiosperm	1	Maas	2	Dawson, 1886	3	NULL	Belly River	2	57.4463	-70.2462	57.6084	-72.4695	56.7546	-75.5175	49.9931	-105.559	70.1	5.1	70	estuarine, aquatic	7	7. estuarine, aquatic	Eastern Area
	Magnoliopsida	6	Fagales	22	Fagaceae	39	Quercus sp	197	457	Angiosperm	1	Maas	2	Dawson, 1886	3	NULL	Belly River	2	57.4463	-70.2462	57.6084	-72.4695	56.7546	-75.5175	49.9931	-105.559	70.1	5.1	70	temperate lowland forest	2	2. temperate lowland forest	Eastern Area
	Magnoliopsida	6	Malpighiales	36	Salicaceae	84	Populus genetrix	189	432	Angiosperm	1	Maas	2	Dawson, 1886	3	NULL	Belly River	2	57.4463	-70.2462	57.6084	-72.4695	56.7546	-75.5175	49.9931	-105.559	70.1	5.1	70	wet, successional	5	5. wet, successional	Eastern Area
	Magnoliopsida	6	Malpighiales	36	Salicaceae	84	Populus acerifolia	189	428	Angiosperm	1	Maas	2	Dawson, 1886	3	NULL	Belly River	2	57.4463	-70.2462	57.6084	-72.4695	56.7546	-75.5175	49.9931	-105.559	70.1	5.1	70	wet, successional	5	5. wet, successional	Eastern Area
	Magnoliopsida	6	Malpighiales	36	Salicaceae	84	Populus arctica	189	430	Angiosperm	1	Maas	2	Dawson, 1886	3	NULL	Belly River	2	57.4463	-70.2462	57.6084	-72.4695	56.7546	-75.5175	49.9931	-105.559	70.1	5.1	70	wet, successional	5	5. wet, successional	Eastern Area
	Magnoliopsida	6	Malpighiales	36	Salicaceae	84	Salix raeana	214	501	Angiosperm	1	Maas	2	Dawson, 1886	3	NULL	Belly River	2	57.4463	-70.2462	57.6084	-72.4695	56.7546	-75.5175	49.9931	-105.559	70.1	5.1	70	temperate lowland forest	2	2. temperate lowland forest	Eastern Area
	Magnoliopsida	6	Malpighiales	36	Salicaceae	84	Salix laramiana	214	499	Angiosperm	1	Maas	2	Dawson, 1886	3	NULL	Belly River	2	57.4463	-70.2462	57.6084	-72.4695	56.7546	-75.5175	49.9931	-105.559	70.1	5.1	70	temperate lowland forest	2	2. temperate lowland forest	Eastern Area
	Magnoliopsida	6	Rosales	51	Ulmaceae	93	Ulmus Praecursor	241	550	Angiosperm	1	Maas	2	Dawson, 1886	3	NULL	Belly River	2	57.4463	-70.2462	57.6084	-72.4695	56.7546	-75.5175	49.9931	-105.559	70.1	5.1	70	temperate lowland forest	2	2. temperate lowland forest	Eastern Area
	Magnoliopsida	6	Laurales	31	Lauraceae	51	Sassafras selwynii	219	510	Angiosperm	1	Maas	2	Dawson, 1886	3	NULL	Belly River	2	57.4463	-70.2462	57.6084	-72.4695	56.7546	-75.5175	49.9931	-105.559	70.1	5.1	70	temperate lowland forest	2	2. temperate lowland forest	Eastern Area
	Magnoliopsida	6	Sapindales	54	Sapindaceae	86	Sapindus affinus	217	506	Angiosperm	1	Maas	2	Dawson, 1886	3	NULL	Belly River	2	57.4463	-70.2462	57.6084	-72.4695	56.7546	-75.5175	49.9931	-105.559	70.1	5.1	70	tropical lowland forest	6	6. tropical lowland forest	Eastern Area
	Magnoliopsida	6	Sapindales	54	Sapindaceae	86	Aesculus antiqua	2	1	Angiosperm	1	Maas	2	Dawson, 1886	3	NULL	Belly River	2	57.4463	-70.2462	57.6084	-72.4695	56.7546	-75.5175	49.9931	-105.559	70.1	5.1	70	temperate lowland forest	2	2. temperate lowland forest	Eastern Area
	Magnoliopsida	6	uncertain	63	uncertain	101	Symphorocarpophyllum	229	531	Angiosperm	1	Maas	2	Dawson, 1886	3	NULL	Belly River	2	57.4463	-70.2462	57.6084	-72.4695	56.7546	-75.5175	49.9931	-105.559	70.1	5.1	70	temperate lowland forest	2	2. temperate lowland forest	Eastern Area
	Magnoliopsida	6	uncertain	63	uncertain	101	Symphorocarpophyllum Albertum	229	532	Angiosperm	1	Maas	2	Dawson, 1886	3	NULL	Belly River	2	57.4463	-70.2462	57.6084	-72.4695	56.7546	-75.5175	49.9931	-105.559	70.1	5.1	70	temperate lowland forest	2	2. temperate lowland forest	Eastern Area
	Magnoliopsida	6	Rosales	51	Rhamnaceae	81	Paliurus colombi	161	356	Angiosperm	1	Maas	2	Dawson, 1886	3	NULL	Belly River	2	57.4463	-70.2462	57.6084	-72.4695	56.7546	-75.5175	49.9931	-105.559	70.1	5.1	70	open scrubland	8	8. open scrubland	Eastern Area
	Magnoliopsida	6	Fagales	22	Juglandaceae	50	Juglans Schimperi	110	241	Angiosperm	1	Maas	2	Dawson, 1886	3	NULL	Belly River	2	57.4463	-70.2462	57.6084	-72.4695	56.7546	-75.5175	49.9931	-105.559	70.1	5.1	70	temperate lowland forest	2	2. temperate lowland forest	Eastern Area
	Magnoliopsida	6	Myrtales	39	Lythraceae	54	Trapa borealis	235	540	Angiosperm	1	Maas	2	Dawson, 1886	3	NULL	Belly River	2	57.4463	-70.2462	57.6084	-72.4695	56.7546	-75.5175	49.9931	-105.559	70.1	5.1	70	estuarine, aquatic	7	7. estuarine, aquatic	Eastern Area
	Magnoliopsida	6	Myrtales	39	Lythraceae	54	Trapa microphylla	235	542	Angiosperm	1	Maas	2	Dawson, 1886	3	NULL	Belly River	2	57.4463	-70.2462	57.6084	-72.4695	56.7546	-75.5175	49.9931	-105.559	70.1	5.1	70	estuarine, aquatic	7	7. estuarine, aquatic	Eastern Area
	Magnoliopsida	6	Lamiales	30	Oleaceae	65	Phyllites sp.	172	376	Angiosperm	1	Maas	2	Dawson, 1886	3	NULL	Belly River	2	57.4463	-70.2462	57.6084	-72.4695	56.7546	-75.5175	49.9931	-105.559	70.1	5.1	70	unknown	0	0. unknown	Eastern Area
	Magnoliopsida	6	Lamiales	30	Oleaceae	65	Phyllites caparinoides	172	369	Angiosperm	1	Maas	2	Dawson, 1886	3	NULL	Belly River	2	57.4463	-70.2462	57.6084	-72.4695	56.7546	-75.5175	49.9931	-105.559	70.1	5.1	70	unknown	0	0. unknown	Eastern Area
	Magnoliopsida	6	Rosales?	52	Ulmaceae?	94	Carpites ulmiformis	34	57	Angiosperm	1	Maas	2	Johnson, 1989	6	0.0683293	Hell Creek	8	53.7127	-70.6485	53.8721	-72.7841	53.0157	-75.7044	46.4067	-103.963	66.4	0.4	65	temperate lowland forest	2	2. temperate lowland forest	Group 1; 86115; Pretty Butte
	Magnoliopsida	6	Proteales	47	Platanaceae	72	Platanophyllum montanum	183	414	Angiosperm	1	Maas	2	Johnson, 1989	6	9.63444	Hell Creek	8	53.7127	-70.6485	53.8721	-72.7841	53.0157	-75.7044	46.4067	-103.963	66.4	0.4	65	temperate lowland forest	2	2. temperate lowland forest	Group 1; 86115; Pretty Butte
	Magnoliopsida	6	Proteales	47	Platanaceae	72	Platanaceae, unknown 5 (HC52)	181	408	Angiosperm	1	Maas	2	Johnson, 1989	6	0.0683293	Hell Creek	8	53.7127	-70.6485	53.8721	-72.7841	53.0157	-75.7044	46.4067	-103.963	66.4	0.4	65	temperate lowland forest	2	2. temperate lowland forest	Group 1; 86115; Pretty Butte
	Magnoliopsida	6	Fagales	22	Fagaceae	39	Dryophyllum subfalcatum	81	163	Angiosperm	1	Maas	2	Johnson, 1989	6	59.7198	Hell Creek	8	53.7127	-70.6485	53.8721	-72.7841	53.0157	-75.7044	46.4067	-103.963	66.4	0.4	65	temperate lowland forest	2	2. temperate lowland forest	Group 1; 86115; Pretty Butte
	Magnoliopsida	6	Laurales	31	Lauraceae	51	Laurophyllum wardiana	115	271	Angiosperm	1	Maas	2	Johnson, 1989	6	0.0341647	Hell Creek	8	53.7127	-70.6485	53.8721	-72.7841	53.0157	-75.7044	46.4067	-103.963	66.4	0.4	65	tropical lowland forest	6	6. tropical lowland forest	Group 1; 86115; Pretty Butte
	Magnoliopsida	6	Ranunculales	48	Menispermaceae	60	Cocculus flabella	54	95	Angiosperm	1	Maas	2	Johnson, 1989	6	0.0341647	Hell Creek	8	53.7127	-70.6485	53.8721	-72.7841	53.0157	-75.7044	46.4067	-103.963	66.4	0.4	65	temperate lowland forest	2	2. temperate lowland forest	Group 1; 87105; Pretty Butte
	Magnoliopsida	6	Vitales	61	Vitaceae	96	Vitis stantonii	244	567	Angiosperm	1	Maas	2	Johnson, 1989	6	28.5275	Hell Creek	8	53.7127	-70.6485	53.8721	-72.7841	53.0157	-75.7044	46.4067	-103.963	66.4	0.4	65	temperate lowland forest	2	2. temperate lowland forest	Group 1; 87105; Pretty Butte
	Magnoliopsida	6	Rosales	51	Ulmaceae	93	Ulmaceae, unknown 1 (HC36)	240	549	Angiosperm	1	Maas	2	Johnson, 1989	6	1.1616	Hell Creek	8	53.7127	-70.6485	53.8721	-72.7841	53.0157	-75.7044	46.4067	-103.963	66.4	0.4	65	temperate lowland forest	2	2. temperate lowland forest	Group 1; 87129; Pretty Butte
	Magnoliopsida	6	Proteales	47	Platanaceae	72	Platanaceae, unknown 2 (HC39)	181	405	Angiosperm	1	Maas	2	Johnson, 1989	6	0.375811	Hell Creek	8	53.7127	-70.6485	53.8721	-72.7841	53.0157	-75.7044	46.4067	-103.963	66.4	0.4	65	temperate lowland forest	2	2. temperate lowland forest	Group 1; 87129; Pretty Butte
	Magnoliopsida	6	Proteales	47	Platanaceae	72	Platanaceae, unknown 3 (HC41)	181	406	Angiosperm	1	Maas	2	Johnson, 1989	6	0.0683293	Hell Creek	8	53.7127	-70.6485	53.8721	-72.7841	53.0157	-75.7044	46.4067	-103.963	66.4	0.4	65	temperate lowland forest	2	2. temperate lowland forest	Group 1; 87129; Pretty Butte
	Magnoliopsida	6	Fagales	22	Fagaceae	39	Dryophyllum subfalcatum	81	163	Angiosperm	1	Maas	2	Johnson, 1989	6	0.170823	Hell Creek	8	53.7127	-70.6485	53.8721	-72.7841	53.0157	-75.7044	46.4067	-103.963	66.4	0.4	65	temperate lowland forest	2	2. temperate lowland forest	Group 1; 87129; Pretty Butte
	Liliopsida	4	Zingiberales	62	Zingiberaceae	100	Zingiberopsis attenuata	253	578	Angiosperm	1	Maas	2	Johnson, 1989	6	0.136659	Hell Creek	8	53.7127	-70.6485	53.8721	-72.7841	53.0157	-75.7044	46.4067	-103.963	66.4	0.4	65	tropical lowland forest	6	6. tropical lowland forest	Group 1; 88109; Pretty Butte
	Pinopsida	9	Pinales	42	Cheirolepidiaceae	21	Androvettia catenulata	7	7	Gymnosperm	3	Maas	2	Johnson, 1989	6	1.25813	Hell Creek	8	53.61	-70.6275	53.7695	-72.7607	52.9134	-75.6785	46.3138	-103.897	66.4	0.4	65	temperate lowland forest	2	2. temperate lowland forest	Group 2; 86100; Marmarth
	Magnoliopsida	6	Laurales	31	Chloranthaceae	22	Chloranthaceae, unknown 1 (HC88)	48	79	Angiosperm	1	Maas	2	Johnson, 1989	6	0.433839	Hell Creek	8	53.61	-70.6275	53.7695	-72.7607	52.9134	-75.6785	46.3138	-103.897	66.4	0.4	65	tropical lowland forest	6	6. tropical lowland forest	Group 2; 86100; Marmarth
	Magnoliopsida	6	Laurales	31	uncertain	101	Laurales, unknown 2 (HC84)	112	252	Angiosperm	1	Maas	2	Johnson, 1989	6	2.25597	Hell Creek	8	53.61	-70.6275	53.7695	-72.7607	52.9134	-75.6785	46.3138	-103.897	66.4	0.4	65	tropical lowland forest	6	6. tropical lowland forest	Group 2; 86100; Marmarth
	Magnoliopsida	6	Laurales	31	uncertain	101	Laurales, unknown 3 (HC87)	112	253	Angiosperm	1	Maas	2	Johnson, 1989	6	0.173536	Hell Creek	8	53.61	-70.6275	53.7695	-72.7607	52.9134	-75.6785	46.3138	-103.897	66.4	0.4	65	tropical lowland forest	6	6. tropical lowland forest	Group 2; 86100; Marmarth
	Magnoliopsida	6	Rosales	51	Cannabaceae	16	Cannabaceae, unknown 1 (HC81)	33	47	Angiosperm	1	Maas	2	Johnson, 1989	6	8.89371	Hell Creek	8	53.61	-70.6275	53.7695	-72.7607	52.9134	-75.6785	46.3138	-103.897	66.4	0.4	65	temperate lowland forest	2	2. temperate lowland forest	Group 2; 86100; Marmarth
	Magnoliopsida	6	Rosales	51	Ficeae	40	Ficus artocarpoides	92	174	Angiosperm	1	Maas	2	Johnson, 1989	6	8.93709	Hell Creek	8	53.61	-70.6275	53.7695	-72.7607	52.9134	-75.6785	46.3138	-103.897	66.4	0.4	65	tropical lowland forest	6	6. tropical lowland forest	Group 2; 86100; Marmarth
	Magnoliopsida	6	Proteales	47	Platanaceae	72	Platanaceae, unknown 9 (HC133)	181	412	Angiosperm	1	Maas	2	Johnson, 1989	6	0.477223	Hell Creek	8	53.61	-70.6275	53.7695	-72.7607	52.9134	-75.6785	46.3138	-103.897	66.4	0.4	65	temperate lowland forest	2	2. temperate lowland forest	Group 2; 86100; Marmarth
	Magnoliopsida	6	Proteales	47	Platanaceae	72	Platanaceae, unknown 10 (HC140)	181	399	Angiosperm	1	Maas	2	Johnson, 1989	6	0.130152	Hell Creek	8	53.61	-70.6275	53.7695	-72.7607	52.9134	-75.6785	46.3138	-103.897	66.4	0.4	65	temperate lowland forest	2	2. temperate lowland forest	Group 2; 86100; Marmarth
	Magnoliopsida	6	Proteales	47	uncertain	101	Proteales, unknown 2 (HC139)	192	443	Angiosperm	1	Maas	2	Johnson, 1989	6	0.824295	Hell Creek	8	53.61	-70.6275	53.7695	-72.7607	52.9134	-75.6785	46.3138	-103.897	66.4	0.4	65	unknown	0	0. unknown	Group 2; 86100; Marmarth
	Magnoliopsida	6	Rosales	51	Rosaceae	82	Rosaceae, unknown 1 (HC80)	209	475	Angiosperm	1	Maas	2	Johnson, 1989	6	7.80911	Hell Creek	8	53.61	-70.6275	53.7695	-72.7607	52.9134	-75.6785	46.3138	-103.897	66.4	0.4	65	unknown	0	0. unknown	Group 2; 86100; Marmarth
	Magnoliopsida	6	Rosales?	52	uncertain	101	Rosidae, unknown 3 (HC90)	210	481	Angiosperm	1	Maas	2	Johnson, 1989	6	0.650759	Hell Creek	8	53.61	-70.6275	53.7695	-72.7607	52.9134	-75.6785	46.3138	-103.897	66.4	0.4	65	unknown	0	0. unknown	Group 2; 86100; Marmarth
	Magnoliopsida	6	Rosales?	52	uncertain	101	Rosidae, unknown 4 (HC 132)	210	482	Angiosperm	1	Maas	2	Johnson, 1989	6	0.824295	Hell Creek	8	53.61	-70.6275	53.7695	-72.7607	52.9134	-75.6785	46.3138	-103.897	66.4	0.4	65	unknown	0	0. unknown	Group 2; 86100; Marmarth
	Magnoliopsida	6	Rosales?	52	uncertain	101	Rosidae, unknown 5 (HC 142)	210	484	Angiosperm	1	Maas	2	Johnson, 1989	6	0.0433839	Hell Creek	8	53.61	-70.6275	53.7695	-72.7607	52.9134	-75.6785	46.3138	-103.897	66.4	0.4	65	unknown	0	0. unknown	Group 2; 86100; Marmarth
	Marchantiopsida	8	Marchantiales	38	Marchantiaceae	58	Marchantia pealii	136	310	Fern/Moss	2	Maas	2	Johnson, 1989	6	0.390456	Hell Creek	8	53.61	-70.6275	53.7695	-72.7607	52.9134	-75.6785	46.3138	-103.897	66.4	0.4	65	tropical lowland forest	6	6. tropical lowland forest	Group 2; 86102; Marmarth
	Pinopsida	9	Pinales	42	Cupressaceae	24	Sequoia sp.	225	527	Gymnosperm	3	Maas	2	Johnson, 1989	6	1.73536	Hell Creek	8	53.61	-70.6275	53.7695	-72.7607	52.9134	-75.6785	46.3138	-103.897	66.4	0.4	65	temperate lowland forest	2	2. temperate lowland forest	Group 2; 86102; Marmarth
	Pinopsida	9	Pinales	42	Cupressaceae	24	Taxodium olrikii	231	536	Gymnosperm	3	Maas	2	Johnson, 1989	6	1.99566	Hell Creek	8	53.61	-70.6275	53.7695	-72.7607	52.9134	-75.6785	46.3138	-103.897	66.4	0.4	65	wet, successional	5	5. wet, successional	Group 2; 86102; Marmarth
	Magnoliopsida	6	Laurales	31	uncertain	101	Laurales, unknown 4 (HC 122)	112	254	Angiosperm	1	Maas	2	Johnson, 1989	6	0.130152	Hell Creek	8	53.61	-70.6275	53.7695	-72.7607	52.9134	-75.6785	46.3138	-103.897	66.4	0.4	65	tropical lowland forest	6	6. tropical lowland forest	Group 2; 86102; Marmarth
	Magnoliopsida	6	Saxifragales	55	Cercidiphyllaceae	20	Cercidiphyllum sp.	47	77	Angiosperm	1	Maas	2	Johnson, 1989	6	2.90672	Hell Creek	8	53.61	-70.6275	53.7695	-72.7607	52.9134	-75.6785	46.3138	-103.897	66.4	0.4	65	temperate lowland forest	2	2. temperate lowland forest	Group 2; 86102; Marmarth
	Magnoliopsida	6	Trochodendrales/Cercidiphyllales	59	uncertain	101	Trochodendrales, unknown 1 (HC73)	237	545	Angiosperm	1	Maas	2	Johnson, 1989	6	3.29718	Hell Creek	8	53.61	-70.6275	53.7695	-72.7607	52.9134	-75.6785	46.3138	-103.897	66.4	0.4	65	tropical lowland forest	6	6. tropical lowland forest	Group 2; 86102; Marmarth
	Magnoliopsida	6	Dilleniales	16	Dilleniaceae	31	Palmate Dilleniidae, unknown 1 (HC72)	162	357	Angiosperm	1	Maas	2	Johnson, 1989	6	0.130152	Hell Creek	8	53.61	-70.6275	53.7695	-72.7607	52.9134	-75.6785	46.3138	-103.897	66.4	0.4	65	unknown	0	0. unknown	Group 2; 86102; Marmarth
	Magnoliopsida	6	Dilleniales	16	Dilleniaceae	31	Pinnate Dilleniidae, unknown 1 (HC127)	176	380	Angiosperm	1	Maas	2	Johnson, 1989	6	0.0867679	Hell Creek	8	53.61	-70.6275	53.7695	-72.7607	52.9134	-75.6785	46.3138	-103.897	66.4	0.4	65	unknown	0	0. unknown	Group 2; 86102; Marmarth
	Polypodiopsida	10	Osmundales	41	Osmundaceae	67	Filicites knowltonii	94	211	Fern/Moss	2	Maas	2	Johnson, 1989	6	0.0433839	Hell Creek	8	53.61	-70.6275	53.7695	-72.7607	52.9134	-75.6785	46.3138	-103.897	66.4	0.4	65	unknown	0	0. unknown	Group 2; 86104; Marmarth
	Polypodiopsida	10	Osmundales	41	Osmundaceae	67	Filicales, unknown 2 (HC78)	93	208	Fern/Moss	2	Maas	2	Johnson, 1989	6	0.0867679	Hell Creek	8	53.61	-70.6275	53.7695	-72.7607	52.9134	-75.6785	46.3138	-103.897	66.4	0.4	65	unknown	0	0. unknown	Group 2; 86104; Marmarth
	Liliopsida	4	Alismatales	1	Araceae	7	Pistia corrugata	180	384	Angiosperm	1	Maas	2	Johnson, 1989	6	3.08026	Hell Creek	8	53.61	-70.6275	53.7695	-72.7607	52.9134	-75.6785	46.3138	-103.897	66.4	0.4	65	estuarine, aquatic	7	7. estuarine, aquatic	Group 2; 86104; Marmarth
	Magnoliopsida	6	Proteales	47	Platanaceae	72	Platanaceae, unknown 6 (HC98)	181	409	Angiosperm	1	Maas	2	Johnson, 1989	6	0.433839	Hell Creek	8	53.61	-70.6275	53.7695	-72.7607	52.9134	-75.6785	46.3138	-103.897	66.4	0.4	65	temperate lowland forest	2	2. temperate lowland forest	Group 2; 86105; Marmarth
	Magnoliopsida	6	Proteales	47	Platanaceae	72	Platanaceae, unknown 7 (HC99)	181	410	Angiosperm	1	Maas	2	Johnson, 1989	6	0.173536	Hell Creek	8	53.61	-70.6275	53.7695	-72.7607	52.9134	-75.6785	46.3138	-103.897	66.4	0.4	65	temperate lowland forest	2	2. temperate lowland forest	Group 2; 86105; Marmarth
	Magnoliopsida	6	Proteales	47	Platanaceae	72	Platanaceae, unknown 11 (HC149)	181	400	Angiosperm	1	Maas	2	Johnson, 1989	6	0.0433839	Hell Creek	8	53.61	-70.6275	53.7695	-72.7607	52.9134	-75.6785	46.3138	-103.897	66.4	0.4	65	temperate lowland forest	2	2. temperate lowland forest	Group 2; 86105; Marmarth
	Magnoliopsida	6	Fagales	22	Fagaceae	39	Fagaceae, unknown 1 (HC100)	91	173	Angiosperm	1	Maas	2	Johnson, 1989	6	0.21692	Hell Creek	8	53.61	-70.6275	53.7695	-72.7607	52.9134	-75.6785	46.3138	-103.897	66.4	0.4	65	temperate lowland forest	2	2. temperate lowland forest	Group 2; 86105; Marmarth
	Pinopsida	9	Pinales	42	Cupressaceae	24	Metasequoia sp.	144	325	Gymnosperm	3	Maas	2	Johnson, 1989	6	1.95228	Hell Creek	8	53.61	-70.6275	53.7695	-72.7607	52.9134	-75.6785	46.3138	-103.897	66.4	0.4	65	temperate lowland forest	2	2. temperate lowland forest	Group 2; 86108; Marmarth
	Magnoliopsida	6	Laurales	31	Lauraceae	51	Cinnamomum lineafolia	50	84	Angiosperm	1	Maas	2	Johnson, 1989	6	6.46421	Hell Creek	8	53.61	-70.6275	53.7695	-72.7607	52.9134	-75.6785	46.3138	-103.897	66.4	0.4	65	tropical lowland forest	6	6. tropical lowland forest	Group 2; 86108; Marmarth
	Magnoliopsida	6	Rosales	51	Urticaceae	95	Urticaceae, unknown 1 (HC93)	242	552	Angiosperm	1	Maas	2	Johnson, 1989	6	0.0867679	Hell Creek	8	53.61	-70.6275	53.7695	-72.7607	52.9134	-75.6785	46.3138	-103.897	66.4	0.4	65	unknown	0	0. unknown	Group 2; 86108; Marmarth
	Magnoliopsida	6	Magnoliales	34	Magnoliaceae	55	Magnoliaceae, unknown 5 (HC 160)	128	300	Angiosperm	1	Maas	2	Johnson, 1989	6	0.0867679	Hell Creek	8	53.61	-70.6275	53.7695	-72.7607	52.9134	-75.6785	46.3138	-103.897	66.4	0.4	65	tropical lowland forest	6	6. tropical lowland forest	Group 2; 86142; Marmarth
	Magnoliopsida	6	Trochodendrales/Cercidiphyllales	59	Trochodendraceae	102	Trochodendroides nebrascensis	238	546	Angiosperm	1	Maas	2	Johnson, 1989	6	4.29501	Hell Creek	8	53.61	-70.6275	53.7695	-72.7607	52.9134	-75.6785	46.3138	-103.897	66.4	0.4	65	tropical lowland forest	6	6. tropical lowland forest	Group 2; 86142; Marmarth
	Magnoliopsida	6	Magnoliales	34	Magnoliaceae	55	Magnoliaceae, unknown 3 (HC66)	128	298	Angiosperm	1	Maas	2	Johnson, 1989	6	1.47505	Hell Creek	8	53.61	-70.6275	53.7695	-72.7607	52.9134	-75.6785	46.3138	-103.897	66.4	0.4	65	tropical lowland forest	6	6. tropical lowland forest	Group 2; 86153; Marmarth
	Magnoliopsida	6	Laurales	31	uncertain	101	Araliaephyllum polevoi	12	16	Angiosperm	1	Maas	2	Johnson, 1989	6	0.21692	Hell Creek	8	53.61	-70.6275	53.7695	-72.7607	52.9134	-75.6785	46.3138	-103.897	66.4	0.4	65	coastal plain	4	4. coastal plain	Group 2; 86153; Marmarth
	Magnoliopsida	6	Proteales	47	Platanaceae	72	Platanophyllum montanum	183	414	Angiosperm	1	Maas	2	Johnson, 1989	6	1.86551	Hell Creek	8	53.61	-70.6275	53.7695	-72.7607	52.9134	-75.6785	46.3138	-103.897	66.4	0.4	65	temperate lowland forest	2	2. temperate lowland forest	Group 2; 86153; Marmarth
	Magnoliopsida	6	Rosales	51	Rhamnaceae	81	Rhamnus cleburnii	205	467	Angiosperm	1	Maas	2	Johnson, 1989	6	2.34273	Hell Creek	8	53.61	-70.6275	53.7695	-72.7607	52.9134	-75.6785	46.3138	-103.897	66.4	0.4	65	temperate lowland forest	2	2. temperate lowland forest	Group 2; 86153; Marmarth
	Magnoliopsida	6	Laurales	31	Lauraceae	51	Cissites acerifolia	51	88	Angiosperm	1	Maas	2	Johnson, 1989	6	0.824295	Hell Creek	8	53.61	-70.6275	53.7695	-72.7607	52.9134	-75.6785	46.3138	-103.897	66.4	0.4	65	upland forest	1	1. upland forest	Group 2; 86153; Marmarth
	Magnoliopsida	6	Magnoliales	34	Magnoliaceae	55	Magnoliaceae, unknown 2 (HC43)	128	297	Angiosperm	1	Maas	2	Johnson, 1989	6	0.650759	Hell Creek	8	53.61	-70.6275	53.7695	-72.7607	52.9134	-75.6785	46.3138	-103.897	66.4	0.4	65	tropical lowland forest	6	6. tropical lowland forest	Group 2; 86158; Marmarth
	Magnoliopsida	6	Rosales	51	Ficeae	40	Ficus planicostata	92	190	Angiosperm	1	Maas	2	Johnson, 1989	6	0.433839	Hell Creek	8	53.61	-70.6275	53.7695	-72.7607	52.9134	-75.6785	46.3138	-103.897	66.4	0.4	65	tropical lowland forest	6	6. tropical lowland forest	Group 2; 86158; Marmarth
	Magnoliopsida	6	Proteales	47	Platanaceae	72	Platanaceae, unknown 4 (HC46)	181	407	Angiosperm	1	Maas	2	Johnson, 1989	6	0.0433839	Hell Creek	8	53.61	-70.6275	53.7695	-72.7607	52.9134	-75.6785	46.3138	-103.897	66.4	0.4	65	temperate lowland forest	2	2. temperate lowland forest	Group 2; 86158; Marmarth
	Magnoliopsida	6	Rosales?	52	uncertain	101	Rosidae, unknown 2 (HC47)	210	480	Angiosperm	1	Maas	2	Johnson, 1989	6	0.0433839	Hell Creek	8	53.61	-70.6275	53.7695	-72.7607	52.9134	-75.6785	46.3138	-103.897	66.4	0.4	65	unknown	0	0. unknown	Group 2; 86158; Marmarth
	Magnoliopsida	6	Vitales	61	Vitaceae	96	Cissus marginata	52	93	Angiosperm	1	Maas	2	Johnson, 1989	6	2.12581	Hell Creek	8	53.61	-70.6275	53.7695	-72.7607	52.9134	-75.6785	46.3138	-103.897	66.4	0.4	65	upland forest	1	1. upland forest	Group 2; 87110; Marmarth
	Magnoliopsida	6	Proteales	47	Platanaceae	72	Grewiopsis saportana	103	234	Angiosperm	1	Maas	2	Johnson, 1989	6	2.29935	Hell Creek	8	53.61	-70.6275	53.7695	-72.7607	52.9134	-75.6785	46.3138	-103.897	66.4	0.4	65	temperate lowland forest	2	2. temperate lowland forest	Group 2; 87110; Marmarth
	Magnoliopsida	6	Fagales	22	Fagaceae	39	Dryophyllum tenneseensis	81	164	Angiosperm	1	Maas	2	Johnson, 1989	6	3.47072	Hell Creek	8	53.61	-70.6275	53.7695	-72.7607	52.9134	-75.6785	46.3138	-103.897	66.4	0.4	65	temperate lowland forest	2	2. temperate lowland forest	Group 2; 87110; Marmarth
	Magnoliopsida	6	Vitales	61	Vitaceae	96	Vitis stantonii	244	567	Angiosperm	1	Maas	2	Johnson, 1989	6	0.0867679	Hell Creek	8	53.61	-70.6275	53.7695	-72.7607	52.9134	-75.6785	46.3138	-103.897	66.4	0.4	65	temperate lowland forest	2	2. temperate lowland forest	Group 2; 87111; Marmarth
	Magnoliopsida	6	Dilleniales	16	Dilleniaceae	31	Pinnate Dilleniidae, unknown 2 (HC156)	176	381	Angiosperm	1	Maas	2	Johnson, 1989	6	0.21692	Hell Creek	8	53.61	-70.6275	53.7695	-72.7607	52.9134	-75.6785	46.3138	-103.897	66.4	0.4	65	unknown	0	0. unknown	Group 2; 87111; Marmarth
	Polypodiopsida	10	Filicales	23	Polypodiaceae	75	Onoclea hesperia	157	347	Fern/Moss	2	Maas	2	Johnson, 1989	6	0.130152	Hell Creek	8	53.61	-70.6275	53.7695	-72.7607	52.9134	-75.6785	46.3138	-103.897	66.4	0.4	65	wet, successional	5	5. wet, successional	Group 2; 87131; River section (Marmarth)
	Magnoliopsida	6	Rosales	51	Urticaceae	95	Urticaceae, unknown 2 (18)	242	553	Angiosperm	1	Maas	2	Johnson, 1989	6	0.650759	Hell Creek	8	53.61	-70.6275	53.7695	-72.7607	52.9134	-75.6785	46.3138	-103.897	66.4	0.4	65	unknown	0	0. unknown	Group 2; 87131; River section (Marmarth)
	Magnoliopsida	6	Proteales	47	uncertain	101	Proteales, unknown 1 (HC22)	192	442	Angiosperm	1	Maas	2	Johnson, 1989	6	0.0433839	Hell Creek	8	53.61	-70.6275	53.7695	-72.7607	52.9134	-75.6785	46.3138	-103.897	66.4	0.4	65	unknown	0	0. unknown	Group 2; 87131; River section (Marmarth)
	Magnoliopsida	6	uncertain	63	uncertain	101	Rosidae, unknown 1 (HC20)	210	476	Angiosperm	1	Maas	2	Johnson, 1989	6	2.1692	Hell Creek	8	53.61	-70.6275	53.7695	-72.7607	52.9134	-75.6785	46.3138	-103.897	66.4	0.4	65	unknown	0	0. unknown	Group 2; 87131; River section (Marmarth)
	Magnoliopsida	6	Proteales	47	Platanaceae	72	Platanaceae, unknown 1 (HC6)	181	398	Angiosperm	1	Maas	2	Johnson, 1989	6	0.0867679	Hell Creek	8	53.61	-70.6275	53.7695	-72.7607	52.9134	-75.6785	46.3138	-103.897	66.4	0.4	65	temperate lowland forest	2	2. temperate lowland forest	Group 2; 87147; River section (Marmarth)
	Magnoliopsida	6	Ranunculales	48	Berberidaceae	12	Berberidaceae, unknown 1 (HC188)	27	40	Angiosperm	1	Maas	2	Johnson, 1989	6	6.81128	Hell Creek	8	53.61	-70.6275	53.7695	-72.7607	52.9134	-75.6785	46.3138	-103.897	66.4	0.4	65	temperate lowland forest	2	2. temperate lowland forest	Group 2; 88121; Marmarth
	Magnoliopsida	6	Vitales	61	Vitaceae	96	Vitis stantonii	244	567	Angiosperm	1	Maas	2	Johnson, 1989	6	0.303688	Hell Creek	8	53.61	-70.6275	53.7695	-72.7607	52.9134	-75.6785	46.3138	-103.897	66.4	0.4	65	temperate lowland forest	2	2. temperate lowland forest	Group 2; 88121; Marmarth
	Pinopsida	9	Pinales	42	uncertain	101	Elatides longifolia	84	167	Gymnosperm	3	Maas	2	Johnson, 1989	6	0.260304	Hell Creek	8	53.61	-70.6275	53.7695	-72.7607	52.9134	-75.6785	46.3138	-103.897	66.4	0.4	65	temperate lowland forest	2	2. temperate lowland forest	Group 2; 88128; Marmarth
	Cycadopsida	2	Bennettitales	5	Cycadeoideaceae	26	Nilssonia yukonensis	154	342	Gymnosperm	3	Maas	2	Johnson, 1989	6	0.694143	Hell Creek	8	53.61	-70.6275	53.7695	-72.7607	52.9134	-75.6785	46.3138	-103.897	66.4	0.4	65	tropical lowland forest	6	6. tropical lowland forest	Group 2; 88128; Marmarth
	Magnoliopsida	6	Laurales	31	uncertain	101	Laurales, unknown 5 (HC162)	112	255	Angiosperm	1	Maas	2	Johnson, 1989	6	2.29935	Hell Creek	8	53.61	-70.6275	53.7695	-72.7607	52.9134	-75.6785	46.3138	-103.897	66.4	0.4	65	tropical lowland forest	6	6. tropical lowland forest	Group 2; 88128; Marmarth
	Magnoliopsida	6	Laurales	31	uncertain	101	Laurales, unknown 6 (HC163)	112	256	Angiosperm	1	Maas	2	Johnson, 1989	6	0.607375	Hell Creek	8	53.61	-70.6275	53.7695	-72.7607	52.9134	-75.6785	46.3138	-103.897	66.4	0.4	65	tropical lowland forest	6	6. tropical lowland forest	Group 2; 88128; Marmarth
	Magnoliopsida	6	Vitales	61	Vitaceae	96	Vitis stantonii	244	567	Angiosperm	1	Maas	2	Johnson, 1989	6	0.173536	Hell Creek	8	53.61	-70.6275	53.7695	-72.7607	52.9134	-75.6785	46.3138	-103.897	66.4	0.4	65	temperate lowland forest	2	2. temperate lowland forest	Group 2; 88128; Marmarth
	Magnoliopsida	6	Magnoliales	34	Magnoliaceae	55	Liriodendron laramiense	123	284	Angiosperm	1	Maas	2	Johnson, 1989	6	3.08026	Hell Creek	8	53.61	-70.6275	53.7695	-72.7607	52.9134	-75.6785	46.3138	-103.897	66.4	0.4	65	coastal plain	4	4. coastal plain	Group 2; 88130; Marmarth
	Magnoliopsida	6	Laurales	31	uncertain	101	Laurales, unknown 7 (HC168)	112	257	Angiosperm	1	Maas	2	Johnson, 1989	6	0.303688	Hell Creek	8	53.61	-70.6275	53.7695	-72.7607	52.9134	-75.6785	46.3138	-103.897	66.4	0.4	65	tropical lowland forest	6	6. tropical lowland forest	Group 2; 88130; Marmarth
	Magnoliopsida	6	Celastrales	8	Celastraceae	18	Celastrus taurenensis	43	69	Angiosperm	1	Maas	2	Johnson, 1989	6	5.85683	Hell Creek	8	53.61	-70.6275	53.7695	-72.7607	52.9134	-75.6785	46.3138	-103.897	66.4	0.4	65	tropical lowland forest	6	6. tropical lowland forest	Group 2; Dynamite Coulee; Marmarth
	Magnoliopsida	6	Proteales	47	uncertain	101	Quercus viburnifolia	197	459	Angiosperm	1	Maas	2	Johnson, 1989	6	0.0433839	Hell Creek	8	53.61	-70.6275	53.7695	-72.7607	52.9134	-75.6785	46.3138	-103.897	66.4	0.4	65	temperate lowland forest	2	2. temperate lowland forest	Group 2; Dynamite Coulee; Marmarth
	Magnoliopsida	6	Violales	60	Flacourtiaceae	41	Flacourtiaceae, unknown 1 (HC144)	96	217	Angiosperm	1	Maas	2	Johnson, 1989	6	0.0433839	Hell Creek	8	53.61	-70.6275	53.7695	-72.7607	52.9134	-75.6785	46.3138	-103.897	66.4	0.4	65	unknown	0	0. unknown	Group 2; Dynamite Coulee; Marmarth
	Magnoliopsida	6	Proteales	47	Platanaceae	72	Platanaceae, unknown 12 (HC151)	181	401	Angiosperm	1	Maas	2	Johnson, 1989	6	5	Hell Creek	8	53.4273	-70.631	53.5868	-72.7603	52.7307	-75.6728	46.1406	-103.813	66.4	0.4	65	temperate lowland forest	2	2. temperate lowland forest	Group 3; 87134; Cedar Hills
	Magnoliopsida	6	Proteales	47	Platanaceae	72	Platanaceae, unknown 13 (HC152)	181	402	Angiosperm	1	Maas	2	Johnson, 1989	6	1.875	Hell Creek	8	53.4273	-70.631	53.5868	-72.7603	52.7307	-75.6728	46.1406	-103.813	66.4	0.4	65	temperate lowland forest	2	2. temperate lowland forest	Group 3; 87134; Cedar Hills
	Liliopsida	4	Alismatales	1	Araceae	7	Porosia verrucosa	190	440	Angiosperm	1	Maas	2	Johnson, 1989	6	1.25	Hell Creek	8	53.4273	-70.631	53.5868	-72.7603	52.7307	-75.6728	46.1406	-103.813	66.4	0.4	65	wet, successional	5	5. wet, successional	Group 3; 87140; Cedar Hills
	Magnoliopsida	6	Nymphaeales	40	Nymphaeaceae	64	Paranymphaea hastata	165	360	Angiosperm	1	Maas	2	Johnson, 1989	6	43.75	Hell Creek	8	53.4273	-70.631	53.5868	-72.7603	52.7307	-75.6728	46.1406	-103.813	66.4	0.4	65	estuarine, aquatic	7	7. estuarine, aquatic	Group 3; 87152; Cedar Hills
	Polypodiopsida	10	Filicales	23	uncertain	101	Filicales, unknown 1 (HC8)	93	207	Fern/Moss	2	Maas	2	Johnson, 1989	6	0.625	Hell Creek	8	53.4273	-70.631	53.5868	-72.7603	52.7307	-75.6728	46.1406	-103.813	66.4	0.4	65	unknown	0	0. unknown	Group 3; 87153; Cedar Hills
	Pinopsida	9	Pinales	42	Cupressaceae	24	Glyptostrobus sp.	102	231	Gymnosperm	3	Maas	2	Johnson, 1989	6	13.75	Hell Creek	8	53.4273	-70.631	53.5868	-72.7603	52.7307	-75.6728	46.1406	-103.813	66.4	0.4	65	swampy, lagoonal	3	3. swampy, lagoonal	Group 3; 87153; Cedar Hills
	Magnoliopsida	6	Malpighiales	36	Salicaceae	84	Populus nebrascensis	189	436	Angiosperm	1	Maas	2	Johnson, 1989	6	3.125	Hell Creek	8	53.4273	-70.631	53.5868	-72.7603	52.7307	-75.6728	46.1406	-103.813	66.4	0.4	65	wet, successional	5	5. wet, successional	Group 3; 87153; Cedar Hills
	Magnoliopsida	6	Malvales	37	uncertain	101	Malvales, unknown 1 (HC7)	134	308	Angiosperm	1	Maas	2	Johnson, 1989	6	8.75	Hell Creek	8	53.4273	-70.631	53.5868	-72.7603	52.7307	-75.6728	46.1406	-103.813	66.4	0.4	65	tropical lowland forest	6	6. tropical lowland forest	Group 3; 87153; Cedar Hills
	Polypodiopsida	10	Filicales	23	uncertain	101	Filicales, unknown 4 (HC190)	93	210	Fern/Moss	2	Maas	2	Johnson, 1989	6	1.875	Hell Creek	8	53.4273	-70.631	53.5868	-72.7603	52.7307	-75.6728	46.1406	-103.813	66.4	0.4	65	unknown	0	0. unknown	Group 3; 88110; Cedar Hills
	Magnoliopsida	6	Magnoliales	34	Magnoliaceae	55	Magnoliaceae, unknown 7 (HC195)	128	302	Angiosperm	1	Maas	2	Johnson, 1989	6	1.875	Hell Creek	8	53.4273	-70.631	53.5868	-72.7603	52.7307	-75.6728	46.1406	-103.813	66.4	0.4	65	tropical lowland forest	6	6. tropical lowland forest	Group 3; 88111; Cedar Hills
	Magnoliopsida	6	Laurales?	32	uncertain	101	Laurales?, unknown 2 (HC192)	113	261	Angiosperm	1	Maas	2	Johnson, 1989	6	12.5	Hell Creek	8	53.4273	-70.631	53.5868	-72.7603	52.7307	-75.6728	46.1406	-103.813	66.4	0.4	65	tropical lowland forest	6	6. tropical lowland forest	Group 3; 88111; Cedar Hills
	Magnoliopsida	6	Rosales?	52	uncertain	101	Rosidae, unknown 6 (HC194)	210	487	Angiosperm	1	Maas	2	Johnson, 1989	6	1.25	Hell Creek	8	53.4273	-70.631	53.5868	-72.7603	52.7307	-75.6728	46.1406	-103.813	66.4	0.4	65	unknown	0	0. unknown	Group 3; 88111; Cedar Hills
	Magnoliopsida	6	Laurales	31	Lauraceae	51	Cissites lobata	51	90	Angiosperm	1	Maas	2	Johnson, 1989	6	0.625	Hell Creek	8	53.4273	-70.631	53.5868	-72.7603	52.7307	-75.6728	46.1406	-103.813	66.4	0.4	65	upland forest	1	1. upland forest	Group 3; 88112; Cedar Hills
	Magnoliopsida	6	Proteales	47	Platanaceae	72	Platanaceae, unknown 14 (HC197)	181	403	Angiosperm	1	Maas	2	Johnson, 1989	6	3.125	Hell Creek	8	53.4273	-70.631	53.5868	-72.7603	52.7307	-75.6728	46.1406	-103.813	66.4	0.4	65	temperate lowland forest	2	2. temperate lowland forest	Group 3; 88131; Cedar Hills
	Magnoliopsida	6	Proteales	47	Platanaceae	72	Platanaceae, unknown 15 (HC198)	181	404	Angiosperm	1	Maas	2	Johnson, 1989	6	0.625	Hell Creek	8	53.4273	-70.631	53.5868	-72.7603	52.7307	-75.6728	46.1406	-103.813	66.4	0.4	65	temperate lowland forest	2	2. temperate lowland forest	Group 3; 88131; Cedar Hills
	Magnoliopsida	6	Magnoliales	34	Magnoliaceae	55	Magnoliaceae, unknown 1 (HC26)	128	296	Angiosperm	1	Maas	2	Johnson, 1989	6	4.25532	Hell Creek	8	53.309	-70.6518	53.4684	-72.7786	52.6121	-75.6873	46.0248	-103.774	66.4	0.4	65	tropical lowland forest	6	6. tropical lowland forest	Group 4; 87107; Mud Buttes; assumed to be same location as 88107
	Magnoliopsida	6	Laurales	31	uncertain	101	Laurales, unknown 1 (HC30)	112	251	Angiosperm	1	Maas	2	Johnson, 1989	6	4.25532	Hell Creek	8	53.309	-70.6518	53.4684	-72.7786	52.6121	-75.6873	46.0248	-103.774	66.4	0.4	65	tropical lowland forest	6	6. tropical lowland forest	Group 4; 87107; Mud Buttes; assumed to be same location as 88107
	Magnoliopsida	6	Laurales?	32	uncertain	101	Laurales?, unknown 1 (HC32)	113	260	Angiosperm	1	Maas	2	Johnson, 1989	6	2.12766	Hell Creek	8	53.309	-70.6518	53.4684	-72.7786	52.6121	-75.6873	46.0248	-103.774	66.4	0.4	65	tropical lowland forest	6	6. tropical lowland forest	Group 4; 87107; Mud Buttes; assumed to be same location as 88107
	Magnoliopsida	6	Magnoliales	34	Magnoliaceae	55	Magnoliaceae, unknown 6 (HC181)	128	301	Angiosperm	1	Maas	2	Johnson, 1989	6	4.25532	Hell Creek	8	53.309	-70.6518	53.4684	-72.7786	52.6121	-75.6873	46.0248	-103.774	66.4	0.4	65	tropical lowland forest	6	6. tropical lowland forest	Group 4; 88102; Mud Buttes
	Magnoliopsida	6	Piperales	44	Piperaceae	71	Zizyphus fibrillosus	257	584	Angiosperm	1	Maas	2	Johnson, 1989	6	27.6596	Hell Creek	8	53.309	-70.6518	53.4684	-72.7786	52.6121	-75.6873	46.0248	-103.774	66.4	0.4	65	tropical lowland forest	6	6. tropical lowland forest	Group 4; 88102; Mud Buttes
	Magnoliopsida	6	Laurales	31	Lauraceae	51	Cissites puilasokensis	51	91	Angiosperm	1	Maas	2	Johnson, 1989	6	19.1489	Hell Creek	8	53.309	-70.6518	53.4684	-72.7786	52.6121	-75.6873	46.0248	-103.774	66.4	0.4	65	upland forest	1	1. upland forest	Group 4; 88102; Mud Buttes
	Magnoliopsida	6	Laurales	31	Lauraceae	51	Cissites insignis	51	89	Angiosperm	1	Maas	2	Johnson, 1989	6	4.25532	Hell Creek	8	53.309	-70.6518	53.4684	-72.7786	52.6121	-75.6873	46.0248	-103.774	66.4	0.4	65	upland forest	1	1. upland forest	Group 4; 88102; Mud Buttes
	Magnoliopsida	6	Rosales	51	Moraceae	61	Artocarpus lessigiana	19	25	Angiosperm	1	Maas	2	Johnson, 1989	6	17.0213	Hell Creek	8	53.309	-70.6518	53.4684	-72.7786	52.6121	-75.6873	46.0248	-103.774	66.4	0.4	65	tropical lowland forest	6	6. tropical lowland forest	Group 4; 88102; Mud Buttes
	Magnoliopsida	6	Laurales	31	uncertain	101	Laurales, unknown 8 (HC199)	112	258	Angiosperm	1	Maas	2	Johnson, 1989	6	6.38298	Hell Creek	8	53.309	-70.6518	53.4684	-72.7786	52.6121	-75.6873	46.0248	-103.774	66.4	0.4	65	tropical lowland forest	6	6. tropical lowland forest	Group 4; 88102; Mud Buttes
	Magnoliopsida	6	Piperales	44	Saururaceae	87	Saururaceae, unknown 1 (HC184)	220	513	Angiosperm	1	Maas	2	Johnson, 1989	6	4.25532	Hell Creek	8	53.309	-70.6518	53.4684	-72.7786	52.6121	-75.6873	46.0248	-103.774	66.4	0.4	65	tropical lowland forest	6	6. tropical lowland forest	Group 4; 88102; Mud Buttes
	Magnoliopsida	6	Proteales	47	Nelumbonaceae	63	Nelumbo sp.	153	340	Angiosperm	1	Maas	2	Johnson, 1989	6	6.38298	Hell Creek	8	53.309	-70.6518	53.4684	-72.7786	52.6121	-75.6873	46.0248	-103.774	66.4	0.4	65	estuarine, aquatic	7	7. estuarine, aquatic	Group 4; 88102; Mud Buttes
	Magnoliopsida	6	Proteales	47	Platanaceae	72	Sapindopsis powelliana	216	505	Angiosperm	1	Maas	2	Johnson, 1989	6	0.116822	Hell Creek	8	53.3233	-72.0677	53.4718	-74.1999	52.601	-77.0802	45.7635	-104.93	66.4	0.4	65	temperate lowland forest	2	2. temperate lowland forest	Group 5; 86122; Blacktail SE
	Magnoliopsida	6	Laurales	31	Lauraceae	51	Cinnamomum lineafolia	50	84	Angiosperm	1	Maas	2	Johnson, 1989	6	0.116822	Hell Creek	8	53.3233	-72.0677	53.4718	-74.1999	52.601	-77.0802	45.7635	-104.93	66.4	0.4	65	tropical lowland forest	6	6. tropical lowland forest	Group 5; 86123; Blacktail SE
	Polypodiopsida	10	Filicales	23	uncertain	101	Filicales, unknown 3 (HC115)	93	209	Fern/Moss	2	Maas	2	Johnson, 1989	6	0.116822	Hell Creek	8	53.3233	-72.0677	53.4718	-74.1999	52.601	-77.0802	45.7635	-104.93	66.4	0.4	65	unknown	0	0. unknown	Group 5; 86124; Blacktail SE
	Ginkgoopsida	3	Ginkgoales	26	Ginkgoaceae	42	Ginkgo adiantoides	100	223	Gymnosperm	3	Maas	2	Johnson, 1989	6	8.64486	Hell Creek	8	53.3233	-72.0677	53.4718	-74.1999	52.601	-77.0802	45.7635	-104.93	66.4	0.4	65	temperate lowland forest	2	2. temperate lowland forest	Group 5; 86124; Blacktail SE
	Magnoliopsida	6	Magnoliales	34	Magnoliaceae	55	Magnoliaceae, unknown 4 (HC113)	128	299	Angiosperm	1	Maas	2	Johnson, 1989	6	0.116822	Hell Creek	8	53.3233	-72.0677	53.4718	-74.1999	52.601	-77.0802	45.7635	-104.93	66.4	0.4	65	tropical lowland forest	6	6. tropical lowland forest	Group 5; 86124; Blacktail SE
	Magnoliopsida	6	Proteales	47	Platanaceae	72	Platanaceae, unknown 8 (HC116)	181	411	Angiosperm	1	Maas	2	Johnson, 1989	6	0.116822	Hell Creek	8	53.3233	-72.0677	53.4718	-74.1999	52.601	-77.0802	45.7635	-104.93	66.4	0.4	65	temperate lowland forest	2	2. temperate lowland forest	Group 5; 86124; Blacktail SE
	Magnoliopsida	6	Vitales	61	Vitaceae	96	Cissus marginata	52	93	Angiosperm	1	Maas	2	Johnson, 1989	6	28.8551	Hell Creek	8	53.3233	-72.0677	53.4718	-74.1999	52.601	-77.0802	45.7635	-104.93	66.4	0.4	65	upland forest	1	1. upland forest	Group 5; 86126; Blacktail SE
	Magnoliopsida	6	Laurales	31	uncertain	101	Dombeyopsis trivialis	80	156	Angiosperm	1	Maas	2	Johnson, 1989	6	59.5794	Hell Creek	8	53.3233	-72.0677	53.4718	-74.1999	52.601	-77.0802	45.7635	-104.93	66.4	0.4	65	tropical lowland forest	6	6. tropical lowland forest	Group 5; 86126; Blacktail SE
	Magnoliopsida	6	Vitales	61	Vitaceae	96	Vitis stantonii	244	567	Angiosperm	1	Maas	2	Johnson, 1989	6	1.51869	Hell Creek	8	53.3233	-72.0677	53.4718	-74.1999	52.601	-77.0802	45.7635	-104.93	66.4	0.4	65	temperate lowland forest	2	2. temperate lowland forest	Group 5; 86126; Blacktail SE
	Magnoliopsida	6	Fagales	22	Fagaceae	39	Dryophyllum subfalcatum	81	163	Angiosperm	1	Maas	2	Johnson, 1989	6	0.817757	Hell Creek	8	53.3233	-72.0677	53.4718	-74.1999	52.601	-77.0802	45.7635	-104.93	66.4	0.4	65	temperate lowland forest	2	2. temperate lowland forest	Group 5; 86126; Blacktail SE
	Magnoliopsida	6	Vitales	61	Vitaceae	96	Cissus marginata	52	93	Angiosperm	1	Maas	2	Johnson, 1992	7	NULL	Hell Creek	8	53.4273	-70.631	53.5868	-72.7603	52.7307	-75.6728	46.1406	-103.813	66.4	0.4	65	upland forest	1	1. upland forest	Group 3; 87153; Cedar Hills
	Magnoliopsida	6	Ranunculales	48	Papaveraceae	68	Palaeoaster iniquerienda	160	354	Angiosperm	1	Maas	2	Johnson, 1992	7	NULL	Hell Creek	8	53.4273	-70.631	53.5868	-72.7603	52.7307	-75.6728	46.1406	-103.813	66.4	0.4	65	temperate lowland forest	2	2. temperate lowland forest	Group 3; 87153; Cedar Hills
	Pinopsida	9	Pinales	42	Cupressaceae	24	Glyptostrobus sp.	102	231	Gymnosperm	3	Maas	2	Johnson, 1992	7	NULL	Hell Creek	8	53.4273	-70.631	53.5868	-72.7603	52.7307	-75.6728	46.1406	-103.813	66.4	0.4	65	swampy, lagoonal	3	3. swampy, lagoonal	Group 3; 87153; Cedar Hills
	Magnoliopsida	6	Malpighiales	36	Salicaceae	84	Populus nebracensis	189	435	Angiosperm	1	Maas	2	Johnson, 1992	7	NULL	Hell Creek	8	53.4273	-70.631	53.5868	-72.7603	52.7307	-75.6728	46.1406	-103.813	66.4	0.4	65	wet, successional	5	5. wet, successional	Group 3; 87153; Cedar Hills
	Magnoliopsida	6	Fagales	22	Fagaceae	39	Dryophyllum tenneseensis	81	164	Angiosperm	1	Maas	2	Johnson, 1992	7	NULL	Hell Creek	8	53.4273	-70.631	53.5868	-72.7603	52.7307	-75.6728	46.1406	-103.813	66.4	0.4	65	temperate lowland forest	2	2. temperate lowland forest	Group 3; 87153; Cedar Hills
	Magnoliopsida	6	Fagales	22	Fagaceae	39	Dryophyllum subfalcatum	81	163	Angiosperm	1	Maas	2	Johnson, 1992	7	NULL	Hell Creek	8	53.4273	-70.631	53.5868	-72.7603	52.7307	-75.6728	46.1406	-103.813	66.4	0.4	65	temperate lowland forest	2	2. temperate lowland forest	Group 3; 87153; Cedar Hills
	Magnoliopsida	6	Laurales	31	uncertain	101	Dombeyopsis trivialis	80	156	Angiosperm	1	Maas	2	Johnson, 1992	7	NULL	Hell Creek	8	53.4273	-70.631	53.5868	-72.7603	52.7307	-75.6728	46.1406	-103.813	66.4	0.4	65	tropical lowland forest	6	6. tropical lowland forest	Group 3; 87153; Cedar Hills
	Magnoliopsida	6	Nymphaeales	40	Nymphaeaceae	64	Paranymphaea hastata	165	360	Angiosperm	1	Maas	2	Johnson, 1992	7	NULL	Hell Creek	8	53.4273	-70.631	53.5868	-72.7603	52.7307	-75.6728	46.1406	-103.813	66.4	0.4	65	estuarine, aquatic	7	7. estuarine, aquatic	Group 3; 87153; Cedar Hills
	Magnoliopsida	6	Laurales	31	uncertain	101	Laurales, unknown 5 (HC162)	112	255	Angiosperm	1	Maas	2	Johnson, 1992	7	NULL	Hell Creek	8	53.4273	-70.631	53.5868	-72.7603	52.7307	-75.6728	46.1406	-103.813	66.4	0.4	65	tropical lowland forest	6	6. tropical lowland forest	Group 3; 87153; Cedar Hills
	Magnoliopsida	6	Trochodendrales/Cercidiphyllales	59	uncertain	101	Trochodendrales, unknown (FU6)	237	544	Angiosperm	1	Maas	2	Johnson, 1992	7	NULL	Hell Creek	8	53.4273	-70.631	53.5868	-72.7603	52.7307	-75.6728	46.1406	-103.813	66.4	0.4	65	tropical lowland forest	6	6. tropical lowland forest	Group 3; 87153; Cedar Hills
	Magnoliopsida	6	Vitales	61	Vitaceae	96	Cissus marginata	52	93	Angiosperm	1	Maas	2	Johnson, 1992	7	NULL	Hell Creek	8	53.5888	-70.5861	53.7487	-72.7187	52.8929	-75.6367	46.3019	-103.853	66.4	0.4	65	upland forest	1	1. upland forest	Group2; 88127; Marmarth
	Magnoliopsida	6	Proteales	47	Platanaceae	72	Platanophyllum montanum	183	414	Angiosperm	1	Maas	2	Johnson, 1992	7	NULL	Hell Creek	8	53.5888	-70.5861	53.7487	-72.7187	52.8929	-75.6367	46.3019	-103.853	66.4	0.4	65	temperate lowland forest	2	2. temperate lowland forest	Group2; 88127; Marmarth
	Magnoliopsida	6	Laurales	31	uncertain	101	Dombeyopsis trivialis	80	156	Angiosperm	1	Maas	2	Johnson, 1992	7	NULL	Hell Creek	8	53.5888	-70.5861	53.7487	-72.7187	52.8929	-75.6367	46.3019	-103.853	66.4	0.4	65	tropical lowland forest	6	6. tropical lowland forest	Group2; 88127; Marmarth
	Magnoliopsida	6	Nymphaeales	40	Nymphaeaceae	64	Paranymphaea hastata	165	360	Angiosperm	1	Maas	2	Johnson, 1992	7	NULL	Hell Creek	8	53.5888	-70.5861	53.7487	-72.7187	52.8929	-75.6367	46.3019	-103.853	66.4	0.4	65	estuarine, aquatic	7	7. estuarine, aquatic	Group2; 88127; Marmarth
	Magnoliopsida	6	Vitales	61	Vitaceae	96	Cissus marginata	52	93	Angiosperm	1	Maas	2	Johnson, 1992	7	NULL	Hell Creek	8	53.61	-70.6275	53.7695	-72.7607	52.9134	-75.6785	46.3138	-103.897	66.4	0.4	65	upland forest	1	1. upland forest	Group 2; 86158; Marmarth
	Magnoliopsida	6	Proteales	47	Platanaceae	72	Grewiopsis saportana	103	234	Angiosperm	1	Maas	2	Johnson, 1992	7	NULL	Hell Creek	8	53.61	-70.6275	53.7695	-72.7607	52.9134	-75.6785	46.3138	-103.897	66.4	0.4	65	temperate lowland forest	2	2. temperate lowland forest	Group 2; 86158; Marmarth
	Magnoliopsida	6	Rosales	51	Ficeae	40	Ficus planicostata	92	190	Angiosperm	1	Maas	2	Johnson, 1992	7	NULL	Hell Creek	8	53.61	-70.6275	53.7695	-72.7607	52.9134	-75.6785	46.3138	-103.897	66.4	0.4	65	tropical lowland forest	6	6. tropical lowland forest	Group 2; 86158; Marmarth
	Magnoliopsida	6	Rosales	51	Ulmaceae	93	Ulmaceae, unknown 1 (HC36)	240	549	Angiosperm	1	Maas	2	Johnson, 1992	7	NULL	Hell Creek	8	53.61	-70.6275	53.7695	-72.7607	52.9134	-75.6785	46.3138	-103.897	66.4	0.4	65	temperate lowland forest	2	2. temperate lowland forest	Group 2; 86158; Marmarth
	Magnoliopsida	6	Magnoliales	34	Magnoliaceae	55	Magnoliaceae, unknown 2 (HC43)	128	297	Angiosperm	1	Maas	2	Johnson, 1992	7	NULL	Hell Creek	8	53.61	-70.6275	53.7695	-72.7607	52.9134	-75.6785	46.3138	-103.897	66.4	0.4	65	tropical lowland forest	6	6. tropical lowland forest	Group 2; 86158; Marmarth
	Magnoliopsida	6	Fagales	22	Fagaceae	39	Dryophyllum tenneseensis	81	164	Angiosperm	1	Maas	2	Johnson, 1992	7	NULL	Hell Creek	8	53.61	-70.6275	53.7695	-72.7607	52.9134	-75.6785	46.3138	-103.897	66.4	0.4	65	temperate lowland forest	2	2. temperate lowland forest	Group 2; 86158; Marmarth
	Magnoliopsida	6	Proteales	47	Platanaceae	72	Platanaceae, unknown 4 (HC46)	181	407	Angiosperm	1	Maas	2	Johnson, 1992	7	NULL	Hell Creek	8	53.61	-70.6275	53.7695	-72.7607	52.9134	-75.6785	46.3138	-103.897	66.4	0.4	65	temperate lowland forest	2	2. temperate lowland forest	Group 2; 86158; Marmarth
	Magnoliopsida	6	Rosales?	52	uncertain	101	Rosidae, unknown 2 (HC47)	210	480	Angiosperm	1	Maas	2	Johnson, 1992	7	NULL	Hell Creek	8	53.61	-70.6275	53.7695	-72.7607	52.9134	-75.6785	46.3138	-103.897	66.4	0.4	65	unknown	0	0. unknown	Group 2; 86158; Marmarth
	Magnoliopsida	6	Laurales	31	uncertain	101	Dombeyopsis trivialis	80	156	Angiosperm	1	Maas	2	Johnson, 1992	7	NULL	Hell Creek	8	53.61	-70.6275	53.7695	-72.7607	52.9134	-75.6785	46.3138	-103.897	66.4	0.4	65	tropical lowland forest	6	6. tropical lowland forest	Group 2; 86158; Marmarth
	Magnoliopsida	6	Nymphaeales	40	Nymphaeaceae	64	Paranymphaea hastata	165	360	Angiosperm	1	Maas	2	Johnson, 1992	7	NULL	Hell Creek	8	53.61	-70.6275	53.7695	-72.7607	52.9134	-75.6785	46.3138	-103.897	66.4	0.4	65	estuarine, aquatic	7	7. estuarine, aquatic	Group 2; 86158; Marmarth
	Liliopsida	4	Arecales	3	Arecaceae	9	Amesoneuron sp.	4	4	Angiosperm	1	Maas	2	Johnson, 1992	7	NULL	Hell Creek	8	53.61	-70.6275	53.7695	-72.7607	52.9134	-75.6785	46.3138	-103.897	66.4	0.4	65	tropical lowland forest	6	6. tropical lowland forest	Group 2; 86158; Marmarth
	Magnoliopsida	6	Vitales	61	Vitaceae	96	Cissus marginata	52	93	Angiosperm	1	Maas	2	Johnson, 1992	7	NULL	Hell Creek	8	53.61	-70.6275	53.7695	-72.7607	52.9134	-75.6785	46.3138	-103.897	66.4	0.4	65	upland forest	1	1. upland forest	Group 2; 87147; River section (Marmarth)
	Magnoliopsida	6	Proteales	47	Platanaceae	72	Grewiopsis saportana	103	234	Angiosperm	1	Maas	2	Johnson, 1992	7	NULL	Hell Creek	8	53.61	-70.6275	53.7695	-72.7607	52.9134	-75.6785	46.3138	-103.897	66.4	0.4	65	temperate lowland forest	2	2. temperate lowland forest	Group 2; 87147; River section (Marmarth)
	Magnoliopsida	6	Malpighiales	36	Salicaceae	84	Populus nebracensis	189	435	Angiosperm	1	Maas	2	Johnson, 1992	7	NULL	Hell Creek	8	53.61	-70.6275	53.7695	-72.7607	52.9134	-75.6785	46.3138	-103.897	66.4	0.4	65	wet, successional	5	5. wet, successional	Group 2; 87147; River section (Marmarth)
	Magnoliopsida	6	Fagales	22	Fagaceae	39	Dryophyllum tenneseensis	81	164	Angiosperm	1	Maas	2	Johnson, 1992	7	NULL	Hell Creek	8	53.61	-70.6275	53.7695	-72.7607	52.9134	-75.6785	46.3138	-103.897	66.4	0.4	65	temperate lowland forest	2	2. temperate lowland forest	Group 2; 87147; River section (Marmarth)
	Magnoliopsida	6	Vitales	61	Vitaceae	96	Vitis stantonii	244	567	Angiosperm	1	Maas	2	Johnson, 1992	7	NULL	Hell Creek	8	53.61	-70.6275	53.7695	-72.7607	52.9134	-75.6785	46.3138	-103.897	66.4	0.4	65	temperate lowland forest	2	2. temperate lowland forest	Group 2; 87147; River section (Marmarth)
	Magnoliopsida	6	Nymphaeales	40	Nymphaeaceae	64	Paranymphaea hastata	165	360	Angiosperm	1	Maas	2	Johnson, 1992	7	NULL	Hell Creek	8	53.61	-70.6275	53.7695	-72.7607	52.9134	-75.6785	46.3138	-103.897	66.4	0.4	65	estuarine, aquatic	7	7. estuarine, aquatic	Group 2; 87147; River section (Marmarth)
	Magnoliopsida	6	Magnoliales	34	Magnoliaceae	55	Magnolia pulchra	127	292	Angiosperm	1	Maas	2	Johnson, 1992	7	NULL	Hell Creek	8	53.61	-70.6275	53.7695	-72.7607	52.9134	-75.6785	46.3138	-103.897	66.4	0.4	65	tropical lowland forest	6	6. tropical lowland forest	Group 2; 87147; River section (Marmarth)
	Magnoliopsida	6	Rosales	51	Ficeae	40	Ficus planicostata	92	190	Angiosperm	1	Maas	2	Johnson, 1992	7	NULL	Hell Creek	8	53.309	-70.6518	53.4684	-72.7786	52.6121	-75.6873	46.0248	-103.774	66.4	0.4	65	tropical lowland forest	6	6. tropical lowland forest	Group 4; 88104; Mud Buttes
	Magnoliopsida	6	Vitales	61	Vitaceae	96	Cissus marginata	52	93	Angiosperm	1	Maas	2	Johnson, 1992	7	NULL	Hell Creek	8	53.309	-70.6518	53.4684	-72.7786	52.6121	-75.6873	46.0248	-103.774	66.4	0.4	65	upland forest	1	1. upland forest	Group 4; 88102; Mud Buttes
	Magnoliopsida	6	Rosales	51	Ficeae	40	Ficus planicostata	92	190	Angiosperm	1	Maas	2	Johnson, 1992	7	NULL	Hell Creek	8	53.309	-70.6518	53.4684	-72.7786	52.6121	-75.6873	46.0248	-103.774	66.4	0.4	65	tropical lowland forest	6	6. tropical lowland forest	Group 4; 88102; Mud Buttes
	Magnoliopsida	6	Fagales	22	Fagaceae	39	Dryophyllum tenneseensis	81	164	Angiosperm	1	Maas	2	Johnson, 1992	7	NULL	Hell Creek	8	53.309	-70.6518	53.4684	-72.7786	52.6121	-75.6873	46.0248	-103.774	66.4	0.4	65	temperate lowland forest	2	2. temperate lowland forest	Group 4; 88102; Mud Buttes
	Magnoliopsida	6	Laurales	31	uncertain	101	Dombeyopsis trivialis	80	156	Angiosperm	1	Maas	2	Johnson, 1992	7	NULL	Hell Creek	8	53.309	-70.6518	53.4684	-72.7786	52.6121	-75.6873	46.0248	-103.774	66.4	0.4	65	tropical lowland forest	6	6. tropical lowland forest	Group 4; 88102; Mud Buttes
	Magnoliopsida	6	Vitales	61	Vitaceae	96	Vitis stantonii	244	567	Angiosperm	1	Maas	2	Johnson, 1992	7	NULL	Hell Creek	8	53.309	-70.6518	53.4684	-72.7786	52.6121	-75.6873	46.0248	-103.774	66.4	0.4	65	temperate lowland forest	2	2. temperate lowland forest	Group 4; 88102; Mud Buttes
	Magnoliopsida	6	Nymphaeales	40	Nymphaeaceae	64	Paranymphaea hastata	165	360	Angiosperm	1	Maas	2	Johnson, 1992	7	NULL	Hell Creek	8	53.309	-70.6518	53.4684	-72.7786	52.6121	-75.6873	46.0248	-103.774	66.4	0.4	65	estuarine, aquatic	7	7. estuarine, aquatic	Group 4; 88102; Mud Buttes
	Magnoliopsida	6	Laurales	31	uncertain	101	Laurales, unknown 5 (HC162)	112	255	Angiosperm	1	Maas	2	Johnson, 1992	7	NULL	Hell Creek	8	53.309	-70.6518	53.4684	-72.7786	52.6121	-75.6873	46.0248	-103.774	66.4	0.4	65	tropical lowland forest	6	6. tropical lowland forest	Group 4; 88102; Mud Buttes
	Magnoliopsida	6	Magnoliales	34	Magnoliaceae	55	Liriodendron laramiense	123	284	Angiosperm	1	Maas	2	Johnson, 1992	7	NULL	Hell Creek	8	53.309	-70.6518	53.4684	-72.7786	52.6121	-75.6873	46.0248	-103.774	66.4	0.4	65	coastal plain	4	4. coastal plain	Group 4; 88102; Mud Buttes
	Magnoliopsida	6	Piperales	44	Piperaceae	71	Zizyphus fibrillosus	257	584	Angiosperm	1	Maas	2	Johnson, 1992	7	NULL	Hell Creek	8	53.309	-70.6518	53.4684	-72.7786	52.6121	-75.6873	46.0248	-103.774	66.4	0.4	65	tropical lowland forest	6	6. tropical lowland forest	Group 4; 88102; Mud Buttes
	Magnoliopsida	6	Rosales	51	Moraceae	61	Artocarpus lessigiana	19	25	Angiosperm	1	Maas	2	Johnson, 1992	7	NULL	Hell Creek	8	53.309	-70.6518	53.4684	-72.7786	52.6121	-75.6873	46.0248	-103.774	66.4	0.4	65	tropical lowland forest	6	6. tropical lowland forest	Group 4; 88102; Mud Buttes
	Magnoliopsida	6	Laurales	31	Lauraceae	51	Cissites puilasokensis	51	91	Angiosperm	1	Maas	2	Johnson, 1992	7	NULL	Hell Creek	8	53.309	-70.6518	53.4684	-72.7786	52.6121	-75.6873	46.0248	-103.774	66.4	0.4	65	upland forest	1	1. upland forest	Group 4; 88102; Mud Buttes
	Magnoliopsida	6	Magnoliales	34	Magnoliaceae	55	Magnoliaceae, unknown 6 (HC181)	128	301	Angiosperm	1	Maas	2	Johnson, 1992	7	NULL	Hell Creek	8	53.309	-70.6518	53.4684	-72.7786	52.6121	-75.6873	46.0248	-103.774	66.4	0.4	65	tropical lowland forest	6	6. tropical lowland forest	Group 4; 88102; Mud Buttes
	Magnoliopsida	6	Piperales	44	Saururaceae	87	Saururaceae, unknown (HC182)	220	511	Angiosperm	1	Maas	2	Johnson, 1992	7	NULL	Hell Creek	8	53.309	-70.6518	53.4684	-72.7786	52.6121	-75.6873	46.0248	-103.774	66.4	0.4	65	tropical lowland forest	6	6. tropical lowland forest	Group 4; 88102; Mud Buttes
	Magnoliopsida	6	Laurales	31	Lauraceae	51	Cissites insignis	51	89	Angiosperm	1	Maas	2	Johnson, 1992	7	NULL	Hell Creek	8	53.309	-70.6518	53.4684	-72.7786	52.6121	-75.6873	46.0248	-103.774	66.4	0.4	65	upland forest	1	1. upland forest	Group 4; 88102; Mud Buttes
	Magnoliopsida	6	Laurales	31	uncertain	101	Laurales, unknown 8 (HC199)	112	258	Angiosperm	1	Maas	2	Johnson, 1992	7	NULL	Hell Creek	8	53.309	-70.6518	53.4684	-72.7786	52.6121	-75.6873	46.0248	-103.774	66.4	0.4	65	tropical lowland forest	6	6. tropical lowland forest	Group 4; 88102; Mud Buttes
	Magnoliopsida	6	Proteales	47	Platanaceae	72	Platanus raynoldsii	184	420	Angiosperm	1	Maas	2	Johnson, 1992	7	NULL	Hell Creek	8	53.309	-70.6518	53.4684	-72.7786	52.6121	-75.6873	46.0248	-103.774	66.4	0.4	65	temperate lowland forest	2	2. temperate lowland forest	Group 4; 88102; Mud Buttes
	Pinopsida	9	Pinales	42	Cheirolepidiaceae	21	Cupressinocladus interruptus	64	119	Gymnosperm	3	Maas	2	Johnson, 1992	7	NULL	Hell Creek	8	53.309	-70.6518	53.4684	-72.7786	52.6121	-75.6873	46.0248	-103.774	66.4	0.4	65	temperate lowland forest	2	2. temperate lowland forest	Group 4; 88102; Mud Buttes
	Liliopsida	4	Arecales	3	Arecaceae	9	Amesoneuron sp.	4	4	Angiosperm	1	Maas	2	Johnson, 1992	7	NULL	Hell Creek	8	53.309	-70.6518	53.4684	-72.7786	52.6121	-75.6873	46.0248	-103.774	66.4	0.4	65	tropical lowland forest	6	6. tropical lowland forest	Group 4; 88102; Mud Buttes
	Magnoliopsida	6	Laurales	31	uncertain	101	Dombeyopsis trivialis	80	156	Angiosperm	1	Maas	2	Johnson, 1992	7	NULL	Hell Creek	8	53.4273	-70.631	53.5868	-72.7603	52.7307	-75.6728	46.1406	-103.813	66.4	0.4	65	tropical lowland forest	6	6. tropical lowland forest	Group 3; 88112; Cedar Hills
	Magnoliopsida	6	Laurales	31	Lauraceae	51	Cissites lobata	51	90	Angiosperm	1	Maas	2	Johnson, 1992	7	NULL	Hell Creek	8	53.4273	-70.631	53.5868	-72.7603	52.7307	-75.6728	46.1406	-103.813	66.4	0.4	65	upland forest	1	1. upland forest	Group 3; 88112; Cedar Hills
	Magnoliopsida	6	Vitales	61	Vitaceae	96	Cissus marginata	52	93	Angiosperm	1	Maas	2	Johnson, 1992	7	NULL	Hell Creek	8	53.309	-70.6518	53.4684	-72.7786	52.6121	-75.6873	46.0248	-103.774	66.4	0.4	65	upland forest	1	1. upland forest	Group 4; 88105; Mud Buttes
	Magnoliopsida	6	Trochodendrales/Cercidiphyllales	59	uncertain	101	Trochodendroides nebrascensis	238	546	Angiosperm	1	Maas	2	Johnson, 1992	7	NULL	Hell Creek	8	53.309	-70.6518	53.4684	-72.7786	52.6121	-75.6873	46.0248	-103.774	66.4	0.4	65	tropical lowland forest	6	6. tropical lowland forest	Group 4; 88105; Mud Buttes
	Magnoliopsida	6	Laurales	31	uncertain	101	Dombeyopsis trivialis	80	156	Angiosperm	1	Maas	2	Johnson, 1992	7	NULL	Hell Creek	8	53.309	-70.6518	53.4684	-72.7786	52.6121	-75.6873	46.0248	-103.774	66.4	0.4	65	tropical lowland forest	6	6. tropical lowland forest	Group 4; 88105; Mud Buttes
	Magnoliopsida	6	Vitales	61	Vitaceae	96	Cissus marginata	52	93	Angiosperm	1	Maas	2	Johnson, 1992	7	NULL	Hell Creek	8	53.5888	-70.5861	53.7487	-72.7187	52.8929	-75.6367	46.3019	-103.853	66.4	0.4	65	upland forest	1	1. upland forest	Group 2; 88124; Marmarth
	Magnoliopsida	6	Laurales	31	uncertain	101	Dombeyopsis trivialis	80	156	Angiosperm	1	Maas	2	Johnson, 1992	7	NULL	Hell Creek	8	53.5888	-70.5861	53.7487	-72.7187	52.8929	-75.6367	46.3019	-103.853	66.4	0.4	65	tropical lowland forest	6	6. tropical lowland forest	Group 2; 88124; Marmarth
	Magnoliopsida	6	Vitales	61	Vitaceae	96	Vitis stantonii	244	567	Angiosperm	1	Maas	2	Johnson, 1992	7	NULL	Hell Creek	8	53.5888	-70.5861	53.7487	-72.7187	52.8929	-75.6367	46.3019	-103.853	66.4	0.4	65	temperate lowland forest	2	2. temperate lowland forest	Group 2; 88124; Marmarth
	Magnoliopsida	6	Laurales	31	uncertain	101	Laurales, unknown 6 (HC163)	112	256	Angiosperm	1	Maas	2	Johnson, 1992	7	NULL	Hell Creek	8	53.5888	-70.5861	53.7487	-72.7187	52.8929	-75.6367	46.3019	-103.853	66.4	0.4	65	tropical lowland forest	6	6. tropical lowland forest	Group 2; 88124; Marmarth
	Magnoliopsida	6	Vitales	61	Vitaceae	96	Cissus marginata	52	93	Angiosperm	1	Maas	2	Johnson, 1992	7	NULL	Hell Creek	8	53.7265	-70.6598	53.8858	-72.7957	53.0293	-75.7161	46.4175	-103.979	66.4	0.4	65	upland forest	1	1. upland forest	Group 1; 88123; Pretty Butte
	Magnoliopsida	6	Proteales	47	Platanaceae	72	Grewiopsis saportana	103	234	Angiosperm	1	Maas	2	Johnson, 1992	7	NULL	Hell Creek	8	53.7265	-70.6598	53.8858	-72.7957	53.0293	-75.7161	46.4175	-103.979	66.4	0.4	65	temperate lowland forest	2	2. temperate lowland forest	Group 1; 88123; Pretty Butte
	Magnoliopsida	6	Fagales	22	Fagaceae	39	Dryophyllum tenneseensis	81	164	Angiosperm	1	Maas	2	Johnson, 1992	7	NULL	Hell Creek	8	53.7265	-70.6598	53.8858	-72.7957	53.0293	-75.7161	46.4175	-103.979	66.4	0.4	65	temperate lowland forest	2	2. temperate lowland forest	Group 1; 88123; Pretty Butte
	Magnoliopsida	6	Fagales	22	Fagaceae	39	Dryophyllum subfalcatum	81	163	Angiosperm	1	Maas	2	Johnson, 1992	7	NULL	Hell Creek	8	53.7265	-70.6598	53.8858	-72.7957	53.0293	-75.7161	46.4175	-103.979	66.4	0.4	65	temperate lowland forest	2	2. temperate lowland forest	Group 1; 88123; Pretty Butte
	Magnoliopsida	6	Laurales	31	uncertain	101	Dombeyopsis trivialis	80	156	Angiosperm	1	Maas	2	Johnson, 1992	7	NULL	Hell Creek	8	53.7265	-70.6598	53.8858	-72.7957	53.0293	-75.7161	46.4175	-103.979	66.4	0.4	65	tropical lowland forest	6	6. tropical lowland forest	Group 1; 88123; Pretty Butte
	Magnoliopsida	6	Nymphaeales	40	Nymphaeaceae	64	Paranymphaea hastata	165	360	Angiosperm	1	Maas	2	Johnson, 1992	7	NULL	Hell Creek	8	53.7265	-70.6598	53.8858	-72.7957	53.0293	-75.7161	46.4175	-103.979	66.4	0.4	65	estuarine, aquatic	7	7. estuarine, aquatic	Group 1; 88123; Pretty Butte
	Magnoliopsida	6	Laurales	31	uncertain	101	Laurales, unknown 5 (HC162)	112	255	Angiosperm	1	Maas	2	Johnson, 1992	7	NULL	Hell Creek	8	53.7265	-70.6598	53.8858	-72.7957	53.0293	-75.7161	46.4175	-103.979	66.4	0.4	65	tropical lowland forest	6	6. tropical lowland forest	Group 1; 88123; Pretty Butte
	Magnoliopsida	6	Piperales	44	Piperaceae	71	Zizyphus fibrillosus	257	584	Angiosperm	1	Maas	2	Johnson, 1992	7	NULL	Hell Creek	8	53.7265	-70.6598	53.8858	-72.7957	53.0293	-75.7161	46.4175	-103.979	66.4	0.4	65	tropical lowland forest	6	6. tropical lowland forest	Group 1; 88123; Pretty Butte
	Liliopsida	4	Arecales	3	Arecaceae	9	Amesoneuron sp.	4	4	Angiosperm	1	Maas	2	Johnson, 1992	7	NULL	Hell Creek	8	53.7265	-70.6598	53.8858	-72.7957	53.0293	-75.7161	46.4175	-103.979	66.4	0.4	65	tropical lowland forest	6	6. tropical lowland forest	Group 1; 88123; Pretty Butte
	Magnoliopsida	6	Proteales	47	Nelumbonaceae	63	Nelumbo sp.	153	340	Angiosperm	1	Maas	2	Johnson, 1992	7	NULL	Hell Creek	8	53.7265	-70.6598	53.8858	-72.7957	53.0293	-75.7161	46.4175	-103.979	66.4	0.4	65	estuarine, aquatic	7	7. estuarine, aquatic	Group 1; 88123; Pretty Butte
	Magnoliopsida	6	Vitales	61	Vitaceae	96	Ampelopsis acerifolia	5	5	Angiosperm	1	Maas	2	Johnson, 1992	7	NULL	Hell Creek	8	53.7265	-70.6598	53.8858	-72.7957	53.0293	-75.7161	46.4175	-103.979	66.4	0.4	65	upland forest	1	1. upland forest	Group 1; 88123; Pretty Butte
	Magnoliopsida	6	Vitales	61	Vitaceae	96	Cissus marginata	52	93	Angiosperm	1	Maas	2	Johnson, 1992	7	NULL	Hell Creek	8	53.4095	-70.619	53.5691	-72.7479	52.7131	-75.66	46.1261	-103.795	66.4	0.4	65	upland forest	1	1. upland forest	Group 3; 87152; Cedar Hills
	Magnoliopsida	6	Laurales	31	uncertain	101	Dombeyopsis trivialis	80	156	Angiosperm	1	Maas	2	Johnson, 1992	7	NULL	Hell Creek	8	53.4095	-70.619	53.5691	-72.7479	52.7131	-75.66	46.1261	-103.795	66.4	0.4	65	tropical lowland forest	6	6. tropical lowland forest	Group 3; 87152; Cedar Hills
	Magnoliopsida	6	Nymphaeales	40	Nymphaeaceae	64	Paranymphaea hastata	165	360	Angiosperm	1	Maas	2	Johnson, 1992	7	NULL	Hell Creek	8	53.4095	-70.619	53.5691	-72.7479	52.7131	-75.66	46.1261	-103.795	66.4	0.4	65	estuarine, aquatic	7	7. estuarine, aquatic	Group 3; 87152; Cedar Hills
	Magnoliopsida	6	Vitales	61	Vitaceae	96	Cissus marginata	52	93	Angiosperm	1	Maas	2	Johnson, 1992	7	NULL	Hell Creek	8	53.5888	-70.5861	53.7487	-72.7187	52.8929	-75.6367	46.3019	-103.853	66.4	0.4	65	upland forest	1	1. upland forest	Group 2; 87110; Marmarth
	Magnoliopsida	6	Proteales	47	Platanaceae	72	Grewiopsis saportana	103	234	Angiosperm	1	Maas	2	Johnson, 1992	7	NULL	Hell Creek	8	53.5888	-70.5861	53.7487	-72.7187	52.8929	-75.6367	46.3019	-103.853	66.4	0.4	65	temperate lowland forest	2	2. temperate lowland forest	Group 2; 87110; Marmarth
	Magnoliopsida	6	Rosales	51	Ficeae	40	Ficus planicostata	92	190	Angiosperm	1	Maas	2	Johnson, 1992	7	NULL	Hell Creek	8	53.5888	-70.5861	53.7487	-72.7187	52.8929	-75.6367	46.3019	-103.853	66.4	0.4	65	tropical lowland forest	6	6. tropical lowland forest	Group 2; 87110; Marmarth
	Magnoliopsida	6	Ranunculales	48	Papaveraceae	68	Palaeoaster iniquerienda	160	354	Angiosperm	1	Maas	2	Johnson, 1992	7	NULL	Hell Creek	8	53.5888	-70.5861	53.7487	-72.7187	52.8929	-75.6367	46.3019	-103.853	66.4	0.4	65	temperate lowland forest	2	2. temperate lowland forest	Group 2; 87110; Marmarth
	Pinopsida	9	Pinales	42	Cupressaceae	24	Metasequoia sp.	144	325	Gymnosperm	3	Maas	2	Johnson, 1992	7	NULL	Hell Creek	8	53.5888	-70.5861	53.7487	-72.7187	52.8929	-75.6367	46.3019	-103.853	66.4	0.4	65	temperate lowland forest	2	2. temperate lowland forest	Group 2; 87110; Marmarth
	Magnoliopsida	6	Rosales	51	Ulmaceae	93	Ulmaceae, unknown 1 (HC36)	240	549	Angiosperm	1	Maas	2	Johnson, 1992	7	NULL	Hell Creek	8	53.5888	-70.5861	53.7487	-72.7187	52.8929	-75.6367	46.3019	-103.853	66.4	0.4	65	temperate lowland forest	2	2. temperate lowland forest	Group 2; 87110; Marmarth
	Magnoliopsida	6	Magnoliales	34	Magnoliaceae	55	Magnoliaceae, unknown 2 (HC43)	128	297	Angiosperm	1	Maas	2	Johnson, 1992	7	NULL	Hell Creek	8	53.5888	-70.5861	53.7487	-72.7187	52.8929	-75.6367	46.3019	-103.853	66.4	0.4	65	tropical lowland forest	6	6. tropical lowland forest	Group 2; 87110; Marmarth
	Magnoliopsida	6	Fagales	22	Fagaceae	39	Dryophyllum tenneseensis	81	164	Angiosperm	1	Maas	2	Johnson, 1992	7	NULL	Hell Creek	8	53.5888	-70.5861	53.7487	-72.7187	52.8929	-75.6367	46.3019	-103.853	66.4	0.4	65	temperate lowland forest	2	2. temperate lowland forest	Group 2; 87110; Marmarth
	Magnoliopsida	6	Fagales	22	Fagaceae	39	Dryophyllum subfalcatum	81	163	Angiosperm	1	Maas	2	Johnson, 1992	7	NULL	Hell Creek	8	53.5888	-70.5861	53.7487	-72.7187	52.8929	-75.6367	46.3019	-103.853	66.4	0.4	65	temperate lowland forest	2	2. temperate lowland forest	Group 2; 87110; Marmarth
	Magnoliopsida	6	Proteales	47	Platanaceae	72	Platanophyllum montanum	183	414	Angiosperm	1	Maas	2	Johnson, 1992	7	NULL	Hell Creek	8	53.5888	-70.5861	53.7487	-72.7187	52.8929	-75.6367	46.3019	-103.853	66.4	0.4	65	temperate lowland forest	2	2. temperate lowland forest	Group 2; 87110; Marmarth
	Pinopsida	9	Pinales	42	Cupressaceae	24	Sequoia sp.	225	527	Gymnosperm	3	Maas	2	Johnson, 1992	7	NULL	Hell Creek	8	53.5888	-70.5861	53.7487	-72.7187	52.8929	-75.6367	46.3019	-103.853	66.4	0.4	65	temperate lowland forest	2	2. temperate lowland forest	Group 2; 87110; Marmarth
	Magnoliopsida	6	Trochodendrales/Cercidiphyllales	59	uncertain	101	Trochodendroides nebrascensis	238	546	Angiosperm	1	Maas	2	Johnson, 1992	7	NULL	Hell Creek	8	53.5888	-70.5861	53.7487	-72.7187	52.8929	-75.6367	46.3019	-103.853	66.4	0.4	65	tropical lowland forest	6	6. tropical lowland forest	Group 2; 87110; Marmarth
	Magnoliopsida	6	Laurales	31	uncertain	101	Dombeyopsis trivialis	80	156	Angiosperm	1	Maas	2	Johnson, 1992	7	NULL	Hell Creek	8	53.5888	-70.5861	53.7487	-72.7187	52.8929	-75.6367	46.3019	-103.853	66.4	0.4	65	tropical lowland forest	6	6. tropical lowland forest	Group 2; 87110; Marmarth
	Magnoliopsida	6	Nymphaeales	40	Nymphaeaceae	64	Paranymphaea hastata	165	360	Angiosperm	1	Maas	2	Johnson, 1992	7	NULL	Hell Creek	8	53.5888	-70.5861	53.7487	-72.7187	52.8929	-75.6367	46.3019	-103.853	66.4	0.4	65	estuarine, aquatic	7	7. estuarine, aquatic	Group 2; 87110; Marmarth
	Magnoliopsida	6	Dilleniales	16	Dilleniaceae	31	Pinnate Dilleniidae, unknown 2 (HC156)	176	381	Angiosperm	1	Maas	2	Johnson, 1992	7	NULL	Hell Creek	8	53.5888	-70.5861	53.7487	-72.7187	52.8929	-75.6367	46.3019	-103.853	66.4	0.4	65	unknown	0	0. unknown	Group 2; 87110; Marmarth
	Magnoliopsida	6	Laurales	31	uncertain	101	Laurales, unknown 5 (HC162)	112	255	Angiosperm	1	Maas	2	Johnson, 1992	7	NULL	Hell Creek	8	53.5888	-70.5861	53.7487	-72.7187	52.8929	-75.6367	46.3019	-103.853	66.4	0.4	65	tropical lowland forest	6	6. tropical lowland forest	Group 2; 87110; Marmarth
	Magnoliopsida	6	Laurales	31	uncertain	101	Laurales, unknown 6 (HC163)	112	256	Angiosperm	1	Maas	2	Johnson, 1992	7	NULL	Hell Creek	8	53.5888	-70.5861	53.7487	-72.7187	52.8929	-75.6367	46.3019	-103.853	66.4	0.4	65	tropical lowland forest	6	6. tropical lowland forest	Group 2; 87110; Marmarth
	Magnoliopsida	6	Magnoliales	34	Magnoliaceae	55	Liriodendron laramiense	123	284	Angiosperm	1	Maas	2	Johnson, 1992	7	NULL	Hell Creek	8	53.5888	-70.5861	53.7487	-72.7187	52.8929	-75.6367	46.3019	-103.853	66.4	0.4	65	coastal plain	4	4. coastal plain	Group 2; 87110; Marmarth
	Magnoliopsida	6	Laurales	31	uncertain	101	Laurales, unknown 7 (HC168)	112	257	Angiosperm	1	Maas	2	Johnson, 1992	7	NULL	Hell Creek	8	53.5888	-70.5861	53.7487	-72.7187	52.8929	-75.6367	46.3019	-103.853	66.4	0.4	65	tropical lowland forest	6	6. tropical lowland forest	Group 2; 87110; Marmarth
	Liliopsida	4	Arecales	3	Arecaceae	9	Amesoneuron sp.	4	4	Angiosperm	1	Maas	2	Johnson, 1992	7	NULL	Hell Creek	8	53.5888	-70.5861	53.7487	-72.7187	52.8929	-75.6367	46.3019	-103.853	66.4	0.4	65	tropical lowland forest	6	6. tropical lowland forest	Group 2; 87110; Marmarth
	Liliopsida	4	Arecales	3	Arecaceae	9	Amesoneuron sp.	4	4	Angiosperm	1	Maas	2	Johnson, 1992	7	NULL	Hell Creek	8	53.309	-70.6518	53.4684	-72.7786	52.6121	-75.6873	46.0248	-103.774	66.4	0.4	65	tropical lowland forest	6	6. tropical lowland forest	Group 4; 87151; Mud Buttes
	Magnoliopsida	6	Trochodendrales/Cercidiphyllales	59	uncertain	101	Trochodendroides nebrascensis	238	546	Angiosperm	1	Maas	2	Johnson, 1992	7	NULL	Hell Creek	8	53.309	-70.6518	53.4684	-72.7786	52.6121	-75.6873	46.0248	-103.774	66.4	0.4	65	tropical lowland forest	6	6. tropical lowland forest	Group 4; 87151; Mud Buttes
	Magnoliopsida	6	Nymphaeales	40	Nymphaeaceae	64	Paranymphaea hastata	165	360	Angiosperm	1	Maas	2	Johnson, 1992	7	NULL	Hell Creek	8	53.309	-70.6518	53.4684	-72.7786	52.6121	-75.6873	46.0248	-103.774	66.4	0.4	65	estuarine, aquatic	7	7. estuarine, aquatic	Group 4; 87151; Mud Buttes
	Magnoliopsida	6	Vitales	61	Vitaceae	96	Cissus marginata	52	93	Angiosperm	1	Maas	2	Johnson, 1992	7	NULL	Hell Creek	8	53.6345	-70.5848	53.7944	-72.7185	52.9387	-75.6378	46.3453	-103.874	66.4	0.4	65	upland forest	1	1. upland forest	Group 2; 88128; Marmarth
	Magnoliopsida	6	Magnoliales	34	Magnoliaceae	55	Magnoliaceae, unknown 2 (HC43)	128	297	Angiosperm	1	Maas	2	Johnson, 1992	7	NULL	Hell Creek	8	53.6345	-70.5848	53.7944	-72.7185	52.9387	-75.6378	46.3453	-103.874	66.4	0.4	65	tropical lowland forest	6	6. tropical lowland forest	Group 2; 88128; Marmarth
	Magnoliopsida	6	Laurales	31	uncertain	101	Dombeyopsis trivialis	80	156	Angiosperm	1	Maas	2	Johnson, 1992	7	NULL	Hell Creek	8	53.6345	-70.5848	53.7944	-72.7185	52.9387	-75.6378	46.3453	-103.874	66.4	0.4	65	tropical lowland forest	6	6. tropical lowland forest	Group 2; 88128; Marmarth
	Magnoliopsida	6	Vitales	61	Vitaceae	96	Vitis stantonii	244	567	Angiosperm	1	Maas	2	Johnson, 1992	7	NULL	Hell Creek	8	53.6345	-70.5848	53.7944	-72.7185	52.9387	-75.6378	46.3453	-103.874	66.4	0.4	65	temperate lowland forest	2	2. temperate lowland forest	Group 2; 88128; Marmarth
	Magnoliopsida	6	Nymphaeales	40	Nymphaeaceae	64	Paranymphaea hastata	165	360	Angiosperm	1	Maas	2	Johnson, 1992	7	NULL	Hell Creek	8	53.6345	-70.5848	53.7944	-72.7185	52.9387	-75.6378	46.3453	-103.874	66.4	0.4	65	estuarine, aquatic	7	7. estuarine, aquatic	Group 2; 88128; Marmarth
	Magnoliopsida	6	Laurales	31	uncertain	101	Laurales, unknown 5 (HC162)	112	255	Angiosperm	1	Maas	2	Johnson, 1992	7	NULL	Hell Creek	8	53.6345	-70.5848	53.7944	-72.7185	52.9387	-75.6378	46.3453	-103.874	66.4	0.4	65	tropical lowland forest	6	6. tropical lowland forest	Group 2; 88128; Marmarth
	Magnoliopsida	6	Laurales	31	uncertain	101	Laurales, unknown 6 (HC163)	112	256	Angiosperm	1	Maas	2	Johnson, 1992	7	NULL	Hell Creek	8	53.6345	-70.5848	53.7944	-72.7185	52.9387	-75.6378	46.3453	-103.874	66.4	0.4	65	tropical lowland forest	6	6. tropical lowland forest	Group 2; 88128; Marmarth
	Cycadopsida	2	Bennettitales	5	Cycadeoideaceae	26	Nilssonia yukonensis	154	342	Gymnosperm	3	Maas	2	Johnson, 1992	7	NULL	Hell Creek	8	53.6345	-70.5848	53.7944	-72.7185	52.9387	-75.6378	46.3453	-103.874	66.4	0.4	65	tropical lowland forest	6	6. tropical lowland forest	Group 2; 88128; Marmarth
	Pinopsida	9	Pinales	42	Araucariaceae	8	Araucarites longifolia	16	21	Gymnosperm	3	Maas	2	Johnson, 1992	7	NULL	Hell Creek	8	53.6345	-70.5848	53.7944	-72.7185	52.9387	-75.6378	46.3453	-103.874	66.4	0.4	65	coastal plain	4	4. coastal plain	Group 2; 88128; Marmarth
	Magnoliopsida	6	Magnoliales	34	Magnoliaceae	55	Liriodendron laramiense	123	284	Angiosperm	1	Maas	2	Johnson, 1992	7	NULL	Hell Creek	8	53.6345	-70.5848	53.7944	-72.7185	52.9387	-75.6378	46.3453	-103.874	66.4	0.4	65	coastal plain	4	4. coastal plain	Group 2; 88128; Marmarth
	Liliopsida	4	Arecales	3	Arecaceae	9	Amesoneuron sp.	4	4	Angiosperm	1	Maas	2	Johnson, 1992	7	NULL	Hell Creek	8	53.6345	-70.5848	53.7944	-72.7185	52.9387	-75.6378	46.3453	-103.874	66.4	0.4	65	tropical lowland forest	6	6. tropical lowland forest	Group 2; 88128; Marmarth
	Magnoliopsida	6	Magnoliales?	35	uncertain	101	Quereuxia angulata	198	460	Angiosperm	1	Maas	2	Johnson, 2002	8	NULL	Hell Creek	8	53.774	-70.662	53.9333	-72.7989	53.0767	-75.7207	46.462	-104.003	66.4	0.4	65	estuarine, aquatic	7	7. estuarine, aquatic	Cannonball Creek localities
	Magnoliopsida	6	Proteales	47	Nelumbonaceae	63	Nelumbium montanum	152	336	Angiosperm	1	Maas	2	Johnson, 2002	8	NULL	Hell Creek	8	53.774	-70.662	53.9333	-72.7989	53.0767	-75.7207	46.462	-104.003	66.4	0.4	65	estuarine, aquatic	7	7. estuarine, aquatic	Cannonball Creek localities
	Magnoliopsida	6	Proteales	47	Platanaceae	72	Platanites marginata	182	413	Angiosperm	1	Maas	2	Johnson, 2002	8	NULL	Hell Creek	8	53.774	-70.662	53.9333	-72.7989	53.0767	-75.7207	46.462	-104.003	66.4	0.4	65	temperate lowland forest	2	2. temperate lowland forest	Cannonball Creek localities
	Magnoliopsida	6	Proteales	47	Platanaceae	72	Grewiopsis saportana	103	234	Angiosperm	1	Maas	2	Johnson, 2002	8	NULL	Hell Creek	8	53.774	-70.662	53.9333	-72.7989	53.0767	-75.7207	46.462	-104.003	66.4	0.4	65	temperate lowland forest	2	2. temperate lowland forest	Cannonball Creek localities
	Magnoliopsida	6	Rosales	51	Moraceae	61	Ficus planicostata	92	190	Angiosperm	1	Maas	2	Johnson, 2002	8	NULL	Hell Creek	8	53.774	-70.662	53.9333	-72.7989	53.0767	-75.7207	46.462	-104.003	66.4	0.4	65	tropical lowland forest	6	6. tropical lowland forest	Cannonball Creek localities
	Magnoliopsida	6	Vitales	61	Vitaceae	96	Vitis stantonii	244	567	Angiosperm	1	Maas	2	Johnson, 2002	8	NULL	Hell Creek	8	53.774	-70.662	53.9333	-72.7989	53.0767	-75.7207	46.462	-104.003	66.4	0.4	65	temperate lowland forest	2	2. temperate lowland forest	Cannonball Creek localities
	Magnoliopsida	6	Rosales	51	Ulmaceae	93	Ulmaceae, unknown 1 (HC36)	240	549	Angiosperm	1	Maas	2	Johnson, 2002	8	NULL	Hell Creek	8	53.774	-70.662	53.9333	-72.7989	53.0767	-75.7207	46.462	-104.003	66.4	0.4	65	temperate lowland forest	2	2. temperate lowland forest	Cannonball Creek localities
	Magnoliopsida	6	Magnoliales	34	Magnoliaceae	55	Magnoliaceae, unknown 2 (HC43)	128	297	Angiosperm	1	Maas	2	Johnson, 2002	8	NULL	Hell Creek	8	53.774	-70.662	53.9333	-72.7989	53.0767	-75.7207	46.462	-104.003	66.4	0.4	65	tropical lowland forest	6	6. tropical lowland forest	Cannonball Creek localities
	Magnoliopsida	6	Fagales	22	Fagaceae	39	Dryophyllum tenneseensis	81	164	Angiosperm	1	Maas	2	Johnson, 2002	8	NULL	Hell Creek	8	53.774	-70.662	53.9333	-72.7989	53.0767	-75.7207	46.462	-104.003	66.4	0.4	65	temperate lowland forest	2	2. temperate lowland forest	Cannonball Creek localities
	Magnoliopsida	6	Fagales	22	Fagaceae	39	Dryophyllum subfalcatum	81	163	Angiosperm	1	Maas	2	Johnson, 2002	8	NULL	Hell Creek	8	53.774	-70.662	53.9333	-72.7989	53.0767	-75.7207	46.462	-104.003	66.4	0.4	65	temperate lowland forest	2	2. temperate lowland forest	Cannonball Creek localities
	Magnoliopsida	6	Rosales?	52	Ulmaceae?	94	Carpites ulmiformes	34	56	Angiosperm	1	Maas	2	Johnson, 2002	8	NULL	Hell Creek	8	53.774	-70.662	53.9333	-72.7989	53.0767	-75.7207	46.462	-104.003	66.4	0.4	65	temperate lowland forest	2	2. temperate lowland forest	Cannonball Creek localities
	uncertain	11	uncertain	63	uncertain	101	Erlingdorfia montana	89	172	Angiosperm	1	Maas	2	Johnson, 2002	8	NULL	Hell Creek	8	53.774	-70.662	53.9333	-72.7989	53.0767	-75.7207	46.462	-104.003	66.4	0.4	65	coastal plain	4	4. coastal plain	Cannonball Creek localities
	Magnoliopsida	6	Rosales	51	Rhamnaceae	81	Rhamnus cleburni	205	466	Angiosperm	1	Maas	2	Johnson, 2002	8	NULL	Hell Creek	8	53.774	-70.662	53.9333	-72.7989	53.0767	-75.7207	46.462	-104.003	66.4	0.4	65	temperate lowland forest	2	2. temperate lowland forest	Cannonball Creek localities
	Pinopsida	9	Pinales	42	Cupressaceae	24	Sequoia sp.	225	527	Gymnosperm	3	Maas	2	Johnson, 2002	8	NULL	Hell Creek	8	53.774	-70.662	53.9333	-72.7989	53.0767	-75.7207	46.462	-104.003	66.4	0.4	65	temperate lowland forest	2	2. temperate lowland forest	Cannonball Creek localities
	Magnoliopsida	6	Trochodendrales/Cercidiphyllales	59	uncertain	101	Trochodendroides nebrascensis	238	546	Angiosperm	1	Maas	2	Johnson, 2002	8	NULL	Hell Creek	8	53.774	-70.662	53.9333	-72.7989	53.0767	-75.7207	46.462	-104.003	66.4	0.4	65	tropical lowland forest	6	6. tropical lowland forest	Cannonball Creek localities
	Magnoliopsida	6	Laurales	31	Lauraceae	51	Marmarthia trivialis	138	314	Angiosperm	1	Maas	2	Johnson, 2002	8	NULL	Hell Creek	8	53.774	-70.662	53.9333	-72.7989	53.0767	-75.7207	46.462	-104.003	66.4	0.4	65	tropical lowland forest	6	6. tropical lowland forest	Cannonball Creek localities
	Magnoliopsida	6	Proteales	47	Platanaceae	72	Platanites marginata	182	413	Angiosperm	1	Maas	2	Johnson, 2002	8	NULL	Hell Creek	8	53.774	-70.662	53.9333	-72.7989	53.0767	-75.7207	46.462	-104.003	66.4	0.4	65	temperate lowland forest	2	2. temperate lowland forest	Cannonball Creek localities
	Magnoliopsida	6	Nymphaeales	40	Nymphaeaceae	64	Paranymphaea hastata	165	360	Angiosperm	1	Maas	2	Johnson, 2002	8	NULL	Hell Creek	8	53.774	-70.662	53.9333	-72.7989	53.0767	-75.7207	46.462	-104.003	66.4	0.4	65	estuarine, aquatic	7	7. estuarine, aquatic	Cannonball Creek localities
	Pinopsida	9	Pinales	42	Cupressaceae	24	Fokieniopsis catenulata	97	218	Gymnosperm	3	Maas	2	Johnson, 2002	8	NULL	Hell Creek	8	53.774	-70.662	53.9333	-72.7989	53.0767	-75.7207	46.462	-104.003	66.4	0.4	65	temperate lowland forest	2	2. temperate lowland forest	Cannonball Creek localities
	Magnoliopsida	6	Laurales	31	Lauraceae	51	Marmarthia pearsonii	138	313	Angiosperm	1	Maas	2	Johnson, 2002	8	NULL	Hell Creek	8	53.774	-70.662	53.9333	-72.7989	53.0767	-75.7207	46.462	-104.003	66.4	0.4	65	tropical lowland forest	6	6. tropical lowland forest	Cannonball Creek localities
	Pinopsida	9	Pinales	42	Cupressaceae	24	Elatides longifolia	84	167	Gymnosperm	3	Maas	2	Johnson, 2002	8	NULL	Hell Creek	8	53.774	-70.662	53.9333	-72.7989	53.0767	-75.7207	46.462	-104.003	66.4	0.4	65	temperate lowland forest	2	2. temperate lowland forest	Cannonball Creek localities
	Magnoliopsida	6	Rosales	51	Rhamnaceae	81	Ziziphus fibrillosus	255	581	Angiosperm	1	Maas	2	Johnson, 2002	8	NULL	Hell Creek	8	53.774	-70.662	53.9333	-72.7989	53.0767	-75.7207	46.462	-104.003	66.4	0.4	65	tropical lowland forest	6	6. tropical lowland forest	Cannonball Creek localities
	Magnoliopsida	6	Laurales?	32	Lauraceae?	52	Bisonia niemii	30	43	Angiosperm	1	Maas	2	Johnson, 2002	8	NULL	Hell Creek	8	53.774	-70.662	53.9333	-72.7989	53.0767	-75.7207	46.462	-104.003	66.4	0.4	65	unknown	0	0. unknown	Cannonball Creek localities
	Pinopsida	9	Pinales	42	uncertain	101	Coniferales, unknown (HC313)	56	98	Gymnosperm	3	Maas	2	Johnson, 2002	8	NULL	Hell Creek	8	53.774	-70.662	53.9333	-72.7989	53.0767	-75.7207	46.462	-104.003	66.4	0.4	65	unknown	0	0. unknown	Cannonball Creek localities
	Magnoliopsida	6	Rosales	51	Moraceae	61	Ficus ceratops	92	177	Angiosperm	1	Maas	2	Johnson, 2002	8	NULL	Hell Creek	8	53.774	-70.662	53.9333	-72.7989	53.0767	-75.7207	46.462	-104.003	66.4	0.4	65	tropical lowland forest	6	6. tropical lowland forest	Cannonball Creek localities
	Pinopsida	9	uncertain	63	Dammaritaceae	28	Dammarites sp.	71	128	Gymnosperm	3	Maas	2	Johnson, 2002	8	NULL	Hell Creek	8	53.774	-70.662	53.9333	-72.7989	53.0767	-75.7207	46.462	-104.003	66.4	0.4	65	temperate lowland forest	2	2. temperate lowland forest	Cannonball Creek localities
	Polypodiopsida	10	Salviniales	53	Salviniaceae	85	Salvinia sp.	215	504	Fern/Moss	2	Maas	2	Johnson, 2002	8	NULL	Hell Creek	8	53.774	-70.662	53.9333	-72.7989	53.0767	-75.7207	46.462	-104.003	66.4	0.4	65	estuarine, aquatic	7	7. estuarine, aquatic	Cannonball Creek localities
	Pinopsida	9	Pinales	42	uncertain	101	Coniferales, unknown (HC240)	56	97	Fern/Moss	2	Maas	2	Johnson, 2002	8	NULL	Hell Creek	8	53.774	-70.662	53.9333	-72.7989	53.0767	-75.7207	46.462	-104.003	66.4	0.4	65	unknown	0	0. unknown	Cannonball Creek localities
	Magnoliopsida	6	Cornales (Umbellales)	12	Cornaceae	23	Cornophyllum newberryi	58	100	Angiosperm	1	Maas	2	Johnson, 2002	8	NULL	Hell Creek	8	53.7298	-70.6587	53.8891	-72.7947	53.0326	-75.7152	46.4209	-103.98	66.4	0.4	65	tropical lowland forest	6	6. tropical lowland forest	Pyramid Butte
	Magnoliopsida	6	Proteales	47	Platanaceae	72	Platanites marginata	182	413	Angiosperm	1	Maas	2	Johnson, 2002	8	NULL	Hell Creek	8	53.7298	-70.6587	53.8891	-72.7947	53.0326	-75.7152	46.4209	-103.98	66.4	0.4	65	temperate lowland forest	2	2. temperate lowland forest	Pyramid Butte
	Magnoliopsida	6	Rosales	51	Moraceae	61	Ficus planicostata	92	190	Angiosperm	1	Maas	2	Johnson, 2002	8	NULL	Hell Creek	8	53.7298	-70.6587	53.8891	-72.7947	53.0326	-75.7152	46.4209	-103.98	66.4	0.4	65	tropical lowland forest	6	6. tropical lowland forest	Pyramid Butte
	Magnoliopsida	6	Vitales	61	Vitaceae	96	Vitis stantonii	244	567	Angiosperm	1	Maas	2	Johnson, 2002	8	NULL	Hell Creek	8	53.7298	-70.6587	53.8891	-72.7947	53.0326	-75.7152	46.4209	-103.98	66.4	0.4	65	temperate lowland forest	2	2. temperate lowland forest	Pyramid Butte
	Magnoliopsida	6	Fagales	22	Fagaceae	39	Dryophyllum tenneseensis	81	164	Angiosperm	1	Maas	2	Johnson, 2002	8	NULL	Hell Creek	8	53.7298	-70.6587	53.8891	-72.7947	53.0326	-75.7152	46.4209	-103.98	66.4	0.4	65	temperate lowland forest	2	2. temperate lowland forest	Pyramid Butte
	Magnoliopsida	6	Fagales	22	Fagaceae	39	Dryophyllum subfalcatum	81	163	Angiosperm	1	Maas	2	Johnson, 2002	8	NULL	Hell Creek	8	53.7298	-70.6587	53.8891	-72.7947	53.0326	-75.7152	46.4209	-103.98	66.4	0.4	65	temperate lowland forest	2	2. temperate lowland forest	Pyramid Butte
	Magnoliopsida	6	Proteales	47	Platanaceae	72	Platanaceae, unknown 5 (HC52)	181	408	Angiosperm	1	Maas	2	Johnson, 2002	8	NULL	Hell Creek	8	53.7298	-70.6587	53.8891	-72.7947	53.0326	-75.7152	46.4209	-103.98	66.4	0.4	65	temperate lowland forest	2	2. temperate lowland forest	Pyramid Butte
	Magnoliopsida	6	Rosales?	52	Ulmaceae?	94	Carpites ulmiformes	34	56	Angiosperm	1	Maas	2	Johnson, 2002	8	NULL	Hell Creek	8	53.7298	-70.6587	53.8891	-72.7947	53.0326	-75.7152	46.4209	-103.98	66.4	0.4	65	temperate lowland forest	2	2. temperate lowland forest	Pyramid Butte
	uncertain	11	uncertain	63	uncertain	101	Erlingdorfia montana	90	172	Angiosperm	1	Maas	2	Johnson, 2002	8	NULL	Hell Creek	8	53.7298	-70.6587	53.8891	-72.7947	53.0326	-75.7152	46.4209	-103.98	66.4	0.4	65	coastal plain	4	4. coastal plain	Pyramid Butte
	Magnoliopsida	6	Laurales	31	Lauraceae	51	Laurophyllum wardiana	115	271	Angiosperm	1	Maas	2	Johnson, 2002	8	NULL	Hell Creek	8	53.7298	-70.6587	53.8891	-72.7947	53.0326	-75.7152	46.4209	-103.98	66.4	0.4	65	tropical lowland forest	6	6. tropical lowland forest	Pyramid Butte
	Magnoliopsida	6	Rosales	51	Rhamnaceae	81	Rhamnus cleburni	205	466	Angiosperm	1	Maas	2	Johnson, 2002	8	NULL	Hell Creek	8	53.7298	-70.6587	53.8891	-72.7947	53.0326	-75.7152	46.4209	-103.98	66.4	0.4	65	temperate lowland forest	2	2. temperate lowland forest	Pyramid Butte
	Magnoliopsida	6	Proteales	47	Platanaceae	72	Platanites marginata	182	413	Angiosperm	1	Maas	2	Johnson, 2002	8	NULL	Hell Creek	8	53.7298	-70.6587	53.8891	-72.7947	53.0326	-75.7152	46.4209	-103.98	66.4	0.4	65	temperate lowland forest	2	2. temperate lowland forest	Pyramid Butte
	Pinopsida	9	Pinales	42	Cupressaceae	24	Elatides longifolia	84	167	Gymnosperm	3	Maas	2	Johnson, 2002	8	NULL	Hell Creek	8	53.7298	-70.6587	53.8891	-72.7947	53.0326	-75.7152	46.4209	-103.98	66.4	0.4	65	temperate lowland forest	2	2. temperate lowland forest	Pyramid Butte
	Pinopsida	9	Pinales	42	Cupressaceae	24	Metasequoia occidentalis	144	323	Gymnosperm	3	Maas	2	Johnson, 2002	8	NULL	Hell Creek	8	53.6914	-70.6609	53.8507	-72.796	52.9942	-75.7154	46.3842	-103.963	66.4	0.4	65	temperate lowland forest	2	2. temperate lowland forest	Pretty Butte
	Pinopsida	9	Pinales	42	Cupressaceae	24	Glyptostrobus europaeus	102	229	Gymnosperm	3	Maas	2	Johnson, 2002	8	NULL	Hell Creek	8	53.6914	-70.6609	53.8507	-72.796	52.9942	-75.7154	46.3842	-103.963	66.4	0.4	65	swampy, lagoonal	3	3. swampy, lagoonal	Pretty Butte
	Pinopsida	9	Pinales	42	Cheirolepidiaceae	21	Cupressinocladus interruptus	64	119	Gymnosperm	3	Maas	2	Johnson, 2002	8	NULL	Hell Creek	8	53.6914	-70.6609	53.8507	-72.796	52.9942	-75.7154	46.3842	-103.963	66.4	0.4	65	temperate lowland forest	2	2. temperate lowland forest	Pretty Butte
	Liliopsida	4	Arecales	3	Arecaceae	9	Amesoneuron or Sabalites sp.	4	3	Angiosperm	1	Maas	2	Johnson, 2002	8	NULL	Hell Creek	8	53.6914	-70.6609	53.8507	-72.796	52.9942	-75.7154	46.3842	-103.963	66.4	0.4	65	unknown	0	0. unknown	Pretty Butte
	Polypodiopsida	10	Salviniales	53	Cercidiphyllaceae	20	Nyssidium arcticum	156	345	Angiosperm	1	Maas	2	Johnson, 2002	8	NULL	Hell Creek	8	53.6914	-70.6609	53.8507	-72.796	52.9942	-75.7154	46.3842	-103.963	66.4	0.4	65	wet, successional	5	5. wet, successional	Pretty Butte
	Magnoliopsida	6	Proteales	47	Nelumbonaceae	63	Nelumbium montanum	152	336	Angiosperm	1	Maas	2	Johnson, 2002	8	NULL	Hell Creek	8	53.6914	-70.6609	53.8507	-72.796	52.9942	-75.7154	46.3842	-103.963	66.4	0.4	65	estuarine, aquatic	7	7. estuarine, aquatic	Pretty Butte
	Magnoliopsida	6	Vitales	61	Vitaceae	96	Ampelopsis acerifolia	5	5	Angiosperm	1	Maas	2	Johnson, 2002	8	NULL	Hell Creek	8	53.6914	-70.6609	53.8507	-72.796	52.9942	-75.7154	46.3842	-103.963	66.4	0.4	65	upland forest	1	1. upland forest	Pretty Butte
	Magnoliopsida	6	Proteales	47	Platanaceae	72	Platanites marginata	182	413	Angiosperm	1	Maas	2	Johnson, 2002	8	NULL	Hell Creek	8	53.6914	-70.6609	53.8507	-72.796	52.9942	-75.7154	46.3842	-103.963	66.4	0.4	65	temperate lowland forest	2	2. temperate lowland forest	Pretty Butte
	Magnoliopsida	6	Proteales	47	Platanaceae	72	Grewiopsis saportana	103	234	Angiosperm	1	Maas	2	Johnson, 2002	8	NULL	Hell Creek	8	53.6914	-70.6609	53.8507	-72.796	52.9942	-75.7154	46.3842	-103.963	66.4	0.4	65	temperate lowland forest	2	2. temperate lowland forest	Pretty Butte
	Magnoliopsida	6	Rosales	51	Ulmaceae	93	Ulmaceae, unknown 1 (HC36)	240	549	Angiosperm	1	Maas	2	Johnson, 2002	8	NULL	Hell Creek	8	53.6914	-70.6609	53.8507	-72.796	52.9942	-75.7154	46.3842	-103.963	66.4	0.4	65	temperate lowland forest	2	2. temperate lowland forest	Pretty Butte
	Magnoliopsida	6	Rosales	51	Moraceae	61	Ficus planicostata	92	190	Angiosperm	1	Maas	2	Johnson, 2002	8	NULL	Hell Creek	8	53.6914	-70.6609	53.8507	-72.796	52.9942	-75.7154	46.3842	-103.963	66.4	0.4	65	tropical lowland forest	6	6. tropical lowland forest	Pretty Butte
	Magnoliopsida	6	Ranunculales	48	Papaveraceae	68	Palaeoaster inquirenda	160	355	Angiosperm	1	Maas	2	Johnson, 2002	8	NULL	Hell Creek	8	53.6914	-70.6609	53.8507	-72.796	52.9942	-75.7154	46.3842	-103.963	66.4	0.4	65	temperate lowland forest	2	2. temperate lowland forest	Pretty Butte
	Pinopsida	9	Pinales	42	Cupressaceae	24	Glyptostrobus sp.	102	231	Gymnosperm	3	Maas	2	Johnson, 2002	8	NULL	Hell Creek	8	53.6914	-70.6609	53.8507	-72.796	52.9942	-75.7154	46.3842	-103.963	66.4	0.4	65	swampy, lagoonal	3	3. swampy, lagoonal	Pretty Butte
	Magnoliopsida	6	Vitales	61	Vitaceae	96	Vitis stantonii	244	567	Angiosperm	1	Maas	2	Johnson, 2002	8	NULL	Hell Creek	8	53.6914	-70.6609	53.8507	-72.796	52.9942	-75.7154	46.3842	-103.963	66.4	0.4	65	temperate lowland forest	2	2. temperate lowland forest	Pretty Butte
	Magnoliopsida	6	Dilleniales	16	Dilleniaceae	31	Pinnate Dilleniidae, unknown 2 (HC156)	176	381	Angiosperm	1	Maas	2	Johnson, 2002	8	NULL	Hell Creek	8	53.6914	-70.6609	53.8507	-72.796	52.9942	-75.7154	46.3842	-103.963	66.4	0.4	65	unknown	0	0. unknown	Pretty Butte
	Pinopsida	9	Pinales	42	Cupressaceae	24	Metasequoia sp.	144	325	Gymnosperm	3	Maas	2	Johnson, 2002	8	NULL	Hell Creek	8	53.6914	-70.6609	53.8507	-72.796	52.9942	-75.7154	46.3842	-103.963	66.4	0.4	65	temperate lowland forest	2	2. temperate lowland forest	Pretty Butte
	Magnoliopsida	6	Rosales	51	Ulmaceae	93	Ulmaceae, unknown 1 (HC36)	240	549	Angiosperm	1	Maas	2	Johnson, 2002	8	NULL	Hell Creek	8	53.6914	-70.6609	53.8507	-72.796	52.9942	-75.7154	46.3842	-103.963	66.4	0.4	65	temperate lowland forest	2	2. temperate lowland forest	Pretty Butte
	Magnoliopsida	6	Magnoliales	34	Magnoliaceae	55	Magnoliaceae, unknown 2 (HC43)	128	297	Angiosperm	1	Maas	2	Johnson, 2002	8	NULL	Hell Creek	8	53.6914	-70.6609	53.8507	-72.796	52.9942	-75.7154	46.3842	-103.963	66.4	0.4	65	tropical lowland forest	6	6. tropical lowland forest	Pretty Butte
	Magnoliopsida	6	Fagales	22	Fagaceae	39	Dryophyllum tenneseensis	81	164	Angiosperm	1	Maas	2	Johnson, 2002	8	NULL	Hell Creek	8	53.6914	-70.6609	53.8507	-72.796	52.9942	-75.7154	46.3842	-103.963	66.4	0.4	65	temperate lowland forest	2	2. temperate lowland forest	Pretty Butte
	Magnoliopsida	6	Fagales	22	Fagaceae	39	Dryophyllum subfalcatum	81	163	Angiosperm	1	Maas	2	Johnson, 2002	8	NULL	Hell Creek	8	53.6914	-70.6609	53.8507	-72.796	52.9942	-75.7154	46.3842	-103.963	66.4	0.4	65	temperate lowland forest	2	2. temperate lowland forest	Pretty Butte
	Magnoliopsida	6	Proteales	47	Platanaceae	72	Platanaceae, unknown 5 (HC52)	181	408	Angiosperm	1	Maas	2	Johnson, 2002	8	NULL	Hell Creek	8	53.6914	-70.6609	53.8507	-72.796	52.9942	-75.7154	46.3842	-103.963	66.4	0.4	65	temperate lowland forest	2	2. temperate lowland forest	Pretty Butte
	uncertain	11	uncertain	63	uncertain	101	Erlingdorfia montana	90	172	Angiosperm	1	Maas	2	Johnson, 2002	8	NULL	Hell Creek	8	53.6914	-70.6609	53.8507	-72.796	52.9942	-75.7154	46.3842	-103.963	66.4	0.4	65	coastal plain	4	4. coastal plain	Pretty Butte
	Magnoliopsida	6	Rosales	51	Rhamnaceae	81	Rhamnus cleburni	205	466	Angiosperm	1	Maas	2	Johnson, 2002	8	NULL	Hell Creek	8	53.6914	-70.6609	53.8507	-72.796	52.9942	-75.7154	46.3842	-103.963	66.4	0.4	65	temperate lowland forest	2	2. temperate lowland forest	Pretty Butte
	Magnoliopsida	6	Laurales	31	Lauraceae	51	Cissites acerifolia	51	88	Angiosperm	1	Maas	2	Johnson, 2002	8	NULL	Hell Creek	8	53.6914	-70.6609	53.8507	-72.796	52.9942	-75.7154	46.3842	-103.963	66.4	0.4	65	upland forest	1	1. upland forest	Pretty Butte
	uncertain	11	uncertain	63	uncertain	101	Erlingdorfia montana	89	172	Angiosperm	1	Maas	2	Johnson, 2002	8	NULL	Hell Creek	8	53.6914	-70.6609	53.8507	-72.796	52.9942	-75.7154	46.3842	-103.963	66.4	0.4	65	coastal plain	4	4. coastal plain	Pretty Butte
	Magnoliopsida	6	Magnoliales	34	Magnoliaceae	55	Magnoliaceae, unknown 3 (HC66)	128	298	Angiosperm	1	Maas	2	Johnson, 2002	8	NULL	Hell Creek	8	53.6914	-70.6609	53.8507	-72.796	52.9942	-75.7154	46.3842	-103.963	66.4	0.4	65	tropical lowland forest	6	6. tropical lowland forest	Pretty Butte
	Pinopsida	9	Pinales	42	Cupressaceae	24	Sequoia sp.	225	527	Gymnosperm	3	Maas	2	Johnson, 2002	8	NULL	Hell Creek	8	53.6914	-70.6609	53.8507	-72.796	52.9942	-75.7154	46.3842	-103.963	66.4	0.4	65	temperate lowland forest	2	2. temperate lowland forest	Pretty Butte
	Pinopsida	9	Pinales	42	Cupressaceae	24	Taxodium olrikii	231	536	Gymnosperm	3	Maas	2	Johnson, 2002	8	NULL	Hell Creek	8	53.6914	-70.6609	53.8507	-72.796	52.9942	-75.7154	46.3842	-103.963	66.4	0.4	65	wet, successional	5	5. wet, successional	Pretty Butte
	Magnoliopsida	6	Trochodendrales/Cercidiphyllales	59	uncertain	101	Trochodendrales, unknown 1 (HC73)	237	545	Angiosperm	1	Maas	2	Johnson, 2002	8	NULL	Hell Creek	8	53.6914	-70.6609	53.8507	-72.796	52.9942	-75.7154	46.3842	-103.963	66.4	0.4	65	tropical lowland forest	6	6. tropical lowland forest	Pretty Butte
	Liliopsida	4	Alismatales	1	Araceae	7	Pistia corrugata	180	384	Angiosperm	1	Maas	2	Johnson, 2002	8	NULL	Hell Creek	8	53.6914	-70.6609	53.8507	-72.796	52.9942	-75.7154	46.3842	-103.963	66.4	0.4	65	estuarine, aquatic	7	7. estuarine, aquatic	Pretty Butte
	Magnoliopsida	6	Saxifragales	55	Hamamelidaceae?	47	Leepierceia preartocarpoides	117	277	Angiosperm	1	Maas	2	Johnson, 2002	8	NULL	Hell Creek	8	53.6914	-70.6609	53.8507	-72.796	52.9942	-75.7154	46.3842	-103.963	66.4	0.4	65	coastal plain	4	4. coastal plain	Pretty Butte
	Magnoliopsida	6	Celastrales	8	Celastraceae	18	Celastrus taurenensis	43	69	Angiosperm	1	Maas	2	Johnson, 2002	8	NULL	Hell Creek	8	53.6914	-70.6609	53.8507	-72.796	52.9942	-75.7154	46.3842	-103.963	66.4	0.4	65	tropical lowland forest	6	6. tropical lowland forest	Pretty Butte
	Magnoliopsida	6	Proteales	47	Platanaceae	72	Platanaceae, unknown 6 (HC98)	181	409	Angiosperm	1	Maas	2	Johnson, 2002	8	NULL	Hell Creek	8	53.6914	-70.6609	53.8507	-72.796	52.9942	-75.7154	46.3842	-103.963	66.4	0.4	65	temperate lowland forest	2	2. temperate lowland forest	Pretty Butte
	Magnoliopsida	6	Proteales	47	Platanaceae	72	Platanaceae, unknown 7 (HC99)	181	410	Angiosperm	1	Maas	2	Johnson, 2002	8	NULL	Hell Creek	8	53.6914	-70.6609	53.8507	-72.796	52.9942	-75.7154	46.3842	-103.963	66.4	0.4	65	temperate lowland forest	2	2. temperate lowland forest	Pretty Butte
	Magnoliopsida	6	Fagales	22	Fagaceae	39	Fagaceae, unknown 1 (HC100)	91	173	Angiosperm	1	Maas	2	Johnson, 2002	8	NULL	Hell Creek	8	53.6914	-70.6609	53.8507	-72.796	52.9942	-75.7154	46.3842	-103.963	66.4	0.4	65	temperate lowland forest	2	2. temperate lowland forest	Pretty Butte
	Magnoliopsida	6	Trochodendrales/Cercidiphyllales	59	uncertain	101	Trochodendroides nebrascensis	238	546	Angiosperm	1	Maas	2	Johnson, 2002	8	NULL	Hell Creek	8	53.6914	-70.6609	53.8507	-72.796	52.9942	-75.7154	46.3842	-103.963	66.4	0.4	65	tropical lowland forest	6	6. tropical lowland forest	Pretty Butte
	Magnoliopsida	6	Laurales	31	Lauraceae	51	Marmarthia trivialis	138	314	Angiosperm	1	Maas	2	Johnson, 2002	8	NULL	Hell Creek	8	53.6914	-70.6609	53.8507	-72.796	52.9942	-75.7154	46.3842	-103.963	66.4	0.4	65	tropical lowland forest	6	6. tropical lowland forest	Pretty Butte
	Magnoliopsida	6	Proteales	47	Platanaceae	72	Platanites marginata	182	413	Angiosperm	1	Maas	2	Johnson, 2002	8	NULL	Hell Creek	8	53.6914	-70.6609	53.8507	-72.796	52.9942	-75.7154	46.3842	-103.963	66.4	0.4	65	temperate lowland forest	2	2. temperate lowland forest	Pretty Butte
	Magnoliopsida	6	Vitales	61	Vitaceae	96	Vitis stantonii	244	567	Angiosperm	1	Maas	2	Johnson, 2002	8	NULL	Hell Creek	8	53.6914	-70.6609	53.8507	-72.796	52.9942	-75.7154	46.3842	-103.963	66.4	0.4	65	temperate lowland forest	2	2. temperate lowland forest	Pretty Butte
	Magnoliopsida	6	Nymphaeales	40	Nymphaeaceae	64	Paranymphaea hastata	165	360	Angiosperm	1	Maas	2	Johnson, 2002	8	NULL	Hell Creek	8	53.6914	-70.6609	53.8507	-72.796	52.9942	-75.7154	46.3842	-103.963	66.4	0.4	65	estuarine, aquatic	7	7. estuarine, aquatic	Pretty Butte
	Ginkgoopsida	3	Ginkgoales	26	Ginkgoaceae	42	Ginkgo adiantoides	100	223	Gymnosperm	3	Maas	2	Johnson, 2002	8	NULL	Hell Creek	8	53.6914	-70.6609	53.8507	-72.796	52.9942	-75.7154	46.3842	-103.963	66.4	0.4	65	temperate lowland forest	2	2. temperate lowland forest	Pretty Butte
	Polypodiopsida	10	Salviniales	53	Hydropteridiaceae	49	Hydropteris pinnata	109	240	Fern/Moss	2	Maas	2	Johnson, 2002	8	NULL	Hell Creek	8	53.6914	-70.6609	53.8507	-72.796	52.9942	-75.7154	46.3842	-103.963	66.4	0.4	65	estuarine, aquatic	7	7. estuarine, aquatic	Pretty Butte
	Magnoliopsida	6	Proteales	47	Platanaceae	72	Platanaceae, unknown 12 (HC151)	181	401	Angiosperm	1	Maas	2	Johnson, 2002	8	NULL	Hell Creek	8	53.6914	-70.6609	53.8507	-72.796	52.9942	-75.7154	46.3842	-103.963	66.4	0.4	65	temperate lowland forest	2	2. temperate lowland forest	Pretty Butte
	Magnoliopsida	6	Laurales	31	Lauraceae	51	Marmarthia pearsonii	138	313	Angiosperm	1	Maas	2	Johnson, 2002	8	NULL	Hell Creek	8	53.6914	-70.6609	53.8507	-72.796	52.9942	-75.7154	46.3842	-103.963	66.4	0.4	65	tropical lowland forest	6	6. tropical lowland forest	Pretty Butte
	Cycadopsida	2	Bennettitales	5	Cycadeoideaceae	26	Nilssonia yukonensis	154	342	Gymnosperm	3	Maas	2	Johnson, 2002	8	NULL	Hell Creek	8	53.6914	-70.6609	53.8507	-72.796	52.9942	-75.7154	46.3842	-103.963	66.4	0.4	65	tropical lowland forest	6	6. tropical lowland forest	Pretty Butte
	Pinopsida	9	Pinales	42	Cupressaceae	24	Elatides longifolia	84	167	Gymnosperm	3	Maas	2	Johnson, 2002	8	NULL	Hell Creek	8	53.6914	-70.6609	53.8507	-72.796	52.9942	-75.7154	46.3842	-103.963	66.4	0.4	65	temperate lowland forest	2	2. temperate lowland forest	Pretty Butte
	Magnoliopsida	6	Magnoliales	34	Magnoliaceae?	56	Liriodendrites bradacii	122	283	Angiosperm	1	Maas	2	Johnson, 2002	8	NULL	Hell Creek	8	53.6914	-70.6609	53.8507	-72.796	52.9942	-75.7154	46.3842	-103.963	66.4	0.4	65	coastal plain	4	4. coastal plain	Pretty Butte
	Magnoliopsida	6	Laurales	31	uncertain	101	Laurales, unknown 7 (HC168)	112	257	Angiosperm	1	Maas	2	Johnson, 2002	8	NULL	Hell Creek	8	53.6914	-70.6609	53.8507	-72.796	52.9942	-75.7154	46.3842	-103.963	66.4	0.4	65	tropical lowland forest	6	6. tropical lowland forest	Pretty Butte
	Magnoliopsida	6	Piperales	44	Piperaceae	71	Zizyphus fibrillosus	257	584	Angiosperm	1	Maas	2	Johnson, 2002	8	NULL	Hell Creek	8	53.6914	-70.6609	53.8507	-72.796	52.9942	-75.7154	46.3842	-103.963	66.4	0.4	65	tropical lowland forest	6	6. tropical lowland forest	Pretty Butte
	Magnoliopsida	6	Rosales	51	Moraceae	61	Artocarpus lessigiana	19	25	Angiosperm	1	Maas	2	Johnson, 2002	8	NULL	Hell Creek	8	53.6914	-70.6609	53.8507	-72.796	52.9942	-75.7154	46.3842	-103.963	66.4	0.4	65	tropical lowland forest	6	6. tropical lowland forest	Pretty Butte
	Liliopsida	4	Zingiberales	62	Zingiberaceae	100	Zingiberopsis attenuata	253	578	Angiosperm	1	Maas	2	Johnson, 2002	8	NULL	Hell Creek	8	53.6914	-70.6609	53.8507	-72.796	52.9942	-75.7154	46.3842	-103.963	66.4	0.4	65	tropical lowland forest	6	6. tropical lowland forest	Pretty Butte
	Magnoliopsida	6	Proteales	47	Platanaceae	72	Platanaceae sp. 8	181	393	Angiosperm	1	Maas	2	Johnson, 2002	8	NULL	Hell Creek	8	53.6914	-70.6609	53.8507	-72.796	52.9942	-75.7154	46.3842	-103.963	66.4	0.4	65	temperate lowland forest	2	2. temperate lowland forest	Pretty Butte
	Magnoliopsida	6	Magnoliales	34	Magnoliaceae	55	Liriodendron sp.	123	285	Angiosperm	1	Maas	2	Johnson, 2002	8	NULL	Hell Creek	8	53.6914	-70.6609	53.8507	-72.796	52.9942	-75.7154	46.3842	-103.963	66.4	0.4	65	coastal plain	4	4. coastal plain	Pretty Butte
	Polypodiopsida	10	Filicales	23	uncertain	101	Filicopsida sp.	95	214	Fern/Moss	2	Maas	2	Johnson, 2002	8	NULL	Hell Creek	8	53.6914	-70.6609	53.8507	-72.796	52.9942	-75.7154	46.3842	-103.963	66.4	0.4	65	unknown	0	0. unknown	Pretty Butte
	Magnoliopsida	6	Laurales	31	uncertain	101	Laurales, unknown (HC265)	112	249	Angiosperm	1	Maas	2	Johnson, 2002	8	NULL	Hell Creek	8	53.6914	-70.6609	53.8507	-72.796	52.9942	-75.7154	46.3842	-103.963	66.4	0.4	65	tropical lowland forest	6	6. tropical lowland forest	Pretty Butte
	Magnoliopsida	6	Laurales	31	uncertain	101	Laurales, unknown (HC292)	112	250	Angiosperm	1	Maas	2	Johnson, 2002	8	NULL	Hell Creek	8	53.6914	-70.6609	53.8507	-72.796	52.9942	-75.7154	46.3842	-103.963	66.4	0.4	65	tropical lowland forest	6	6. tropical lowland forest	Pretty Butte
	Pinopsida	9	Pinales	42	Cupressaceae	24	Cupressaceae, unknown (HC339)	63	118	Gymnosperm	3	Maas	2	Johnson, 2002	8	NULL	Hell Creek	8	53.6914	-70.6609	53.8507	-72.796	52.9942	-75.7154	46.3842	-103.963	66.4	0.4	65	temperate lowland forest	2	2. temperate lowland forest	Pretty Butte
	Magnoliopsida	6	Magnoliales?	35	uncertain	101	Quereuxia angulata	198	460	Angiosperm	1	Maas	2	Johnson, 2002	8	NULL	Hell Creek	8	53.6401	-70.6025	53.7998	-72.7363	52.9439	-75.6555	46.3471	-103.891	66.4	0.4	65	estuarine, aquatic	7	7. estuarine, aquatic	River Section
	Pinopsida	9	Pinales	42	Cupressaceae	24	Metasequoia occidentalis	144	323	Gymnosperm	3	Maas	2	Johnson, 2002	8	NULL	Hell Creek	8	53.6401	-70.6025	53.7998	-72.7363	52.9439	-75.6555	46.3471	-103.891	66.4	0.4	65	temperate lowland forest	2	2. temperate lowland forest	River Section
	Magnoliopsida	6	Malpighiales	36	Salicaceae	84	Populus nebrascensis	189	436	Angiosperm	1	Maas	2	Johnson, 2002	8	NULL	Hell Creek	8	53.6401	-70.6025	53.7998	-72.7363	52.9439	-75.6555	46.3471	-103.891	66.4	0.4	65	wet, successional	5	5. wet, successional	River Section
	Magnoliopsida	6	Malvales	37	Malvaceae	57	Harmsia hydrocotyloidea	106	237	Angiosperm	1	Maas	2	Johnson, 2002	8	NULL	Hell Creek	8	53.6401	-70.6025	53.7998	-72.7363	52.9439	-75.6555	46.3471	-103.891	66.4	0.4	65	tropical lowland forest	6	6. tropical lowland forest	River Section
	Liliopsida	4	Arecales	3	Arecaceae	9	Amesoneuron or Sabalites sp.	4	3	Angiosperm	1	Maas	2	Johnson, 2002	8	NULL	Hell Creek	8	53.6401	-70.6025	53.7998	-72.7363	52.9439	-75.6555	46.3471	-103.891	66.4	0.4	65	unknown	0	0. unknown	River Section
	Magnoliopsida	6	uncertain	63	uncertain	101	Ziziphoides flabella	254	580	Angiosperm	1	Maas	2	Johnson, 2002	8	NULL	Hell Creek	8	53.6401	-70.6025	53.7998	-72.7363	52.9439	-75.6555	46.3471	-103.891	66.4	0.4	65	tropical lowland forest	6	6. tropical lowland forest	River Section
	Polypodiopsida	10	Filicales	23	uncertain	101	Filicopsida sp.	95	214	Fern/Moss	2	Maas	2	Johnson, 2002	8	NULL	Hell Creek	8	53.6401	-70.6025	53.7998	-72.7363	52.9439	-75.6555	46.3471	-103.891	66.4	0.4	65	unknown	0	0. unknown	River Section
	Polypodiopsida	10	Salviniales	53	Cercidiphyllaceae	20	Nyssidium arcticum	156	345	Angiosperm	1	Maas	2	Johnson, 2002	8	NULL	Hell Creek	8	53.6401	-70.6025	53.7998	-72.7363	52.9439	-75.6555	46.3471	-103.891	66.4	0.4	65	wet, successional	5	5. wet, successional	River Section
	Magnoliopsida	6	Malvales	37	Malvaceae	57	Penosphyllum cordatum	167	362	Angiosperm	1	Maas	2	Johnson, 2002	8	NULL	Hell Creek	8	53.6401	-70.6025	53.7998	-72.7363	52.9439	-75.6555	46.3471	-103.891	66.4	0.4	65	tropical lowland forest	6	6. tropical lowland forest	River Section
	Magnoliopsida	6	Proteales	47	Platanaceae	72	Platanites marginata	182	413	Angiosperm	1	Maas	2	Johnson, 2002	8	NULL	Hell Creek	8	53.6401	-70.6025	53.7998	-72.7363	52.9439	-75.6555	46.3471	-103.891	66.4	0.4	65	temperate lowland forest	2	2. temperate lowland forest	River Section
	Magnoliopsida	6	Proteales	47	Platanaceae	72	Grewiopsis saportana	103	234	Angiosperm	1	Maas	2	Johnson, 2002	8	NULL	Hell Creek	8	53.6401	-70.6025	53.7998	-72.7363	52.9439	-75.6555	46.3471	-103.891	66.4	0.4	65	temperate lowland forest	2	2. temperate lowland forest	River Section
	Magnoliopsida	6	Rosales	51	Moraceae	61	Ficus planicostata	92	190	Angiosperm	1	Maas	2	Johnson, 2002	8	NULL	Hell Creek	8	53.6401	-70.6025	53.7998	-72.7363	52.9439	-75.6555	46.3471	-103.891	66.4	0.4	65	tropical lowland forest	6	6. tropical lowland forest	River Section
	Pinopsida	9	Pinales	42	Cupressaceae	24	Glyptostrobus sp.	102	231	Gymnosperm	3	Maas	2	Johnson, 2002	8	NULL	Hell Creek	8	53.6401	-70.6025	53.7998	-72.7363	52.9439	-75.6555	46.3471	-103.891	66.4	0.4	65	swampy, lagoonal	3	3. swampy, lagoonal	River Section
	Liliopsida	4	Alismatales	1	Araceae	7	Porosia verrucosa	190	440	Angiosperm	1	Maas	2	Johnson, 2002	8	NULL	Hell Creek	8	53.6401	-70.6025	53.7998	-72.7363	52.9439	-75.6555	46.3471	-103.891	66.4	0.4	65	wet, successional	5	5. wet, successional	River Section
	Magnoliopsida	6	Vitales	61	Vitaceae	96	Vitis stantonii	244	567	Angiosperm	1	Maas	2	Johnson, 2002	8	NULL	Hell Creek	8	53.6401	-70.6025	53.7998	-72.7363	52.9439	-75.6555	46.3471	-103.891	66.4	0.4	65	temperate lowland forest	2	2. temperate lowland forest	River Section
	Magnoliopsida	6	Rosales?	52	uncertain	101	Rosidae, unknown 1 (HC20)	210	476	Angiosperm	1	Maas	2	Johnson, 2002	8	NULL	Hell Creek	8	53.6401	-70.6025	53.7998	-72.7363	52.9439	-75.6555	46.3471	-103.891	66.4	0.4	65	unknown	0	0. unknown	River Section
	Magnoliopsida	6	Proteales	47	uncertain	101	Proteales, unknown 1 (HC22)	192	442	Angiosperm	1	Maas	2	Johnson, 2002	8	NULL	Hell Creek	8	53.6401	-70.6025	53.7998	-72.7363	52.9439	-75.6555	46.3471	-103.891	66.4	0.4	65	unknown	0	0. unknown	River Section
	Magnoliopsida	6	Laurales?	32	uncertain	101	Laurales?, unknown 1 (HC32)	113	260	Angiosperm	1	Maas	2	Johnson, 2002	8	NULL	Hell Creek	8	53.6401	-70.6025	53.7998	-72.7363	52.9439	-75.6555	46.3471	-103.891	66.4	0.4	65	tropical lowland forest	6	6. tropical lowland forest	River Section
	Magnoliopsida	6	Rosales	51	Ulmaceae	93	Ulmaceae, unknown 1 (HC36)	240	549	Angiosperm	1	Maas	2	Johnson, 2002	8	NULL	Hell Creek	8	53.6401	-70.6025	53.7998	-72.7363	52.9439	-75.6555	46.3471	-103.891	66.4	0.4	65	temperate lowland forest	2	2. temperate lowland forest	River Section
	Magnoliopsida	6	Magnoliales	34	Magnoliaceae	55	Magnoliaceae, unknown 2 (HC43)	128	297	Angiosperm	1	Maas	2	Johnson, 2002	8	NULL	Hell Creek	8	53.6401	-70.6025	53.7998	-72.7363	52.9439	-75.6555	46.3471	-103.891	66.4	0.4	65	tropical lowland forest	6	6. tropical lowland forest	River Section
	Magnoliopsida	6	Fagales	22	Fagaceae	39	Dryophyllum tenneseensis	81	164	Angiosperm	1	Maas	2	Johnson, 2002	8	NULL	Hell Creek	8	53.6401	-70.6025	53.7998	-72.7363	52.9439	-75.6555	46.3471	-103.891	66.4	0.4	65	temperate lowland forest	2	2. temperate lowland forest	River Section
	Magnoliopsida	6	Rosales?	52	uncertain	101	Rosidae, unknown 2 (HC47)	210	480	Angiosperm	1	Maas	2	Johnson, 2002	8	NULL	Hell Creek	8	53.6401	-70.6025	53.7998	-72.7363	52.9439	-75.6555	46.3471	-103.891	66.4	0.4	65	unknown	0	0. unknown	River Section
	Magnoliopsida	6	Fagales	22	Fagaceae	39	Dryophyllum subfalcatum	81	163	Angiosperm	1	Maas	2	Johnson, 2002	8	NULL	Hell Creek	8	53.6401	-70.6025	53.7998	-72.7363	52.9439	-75.6555	46.3471	-103.891	66.4	0.4	65	temperate lowland forest	2	2. temperate lowland forest	River Section
	Magnoliopsida	6	Rosales?	52	Ulmaceae?	94	Carpites ulmiformes	34	56	Angiosperm	1	Maas	2	Johnson, 2002	8	NULL	Hell Creek	8	53.6401	-70.6025	53.7998	-72.7363	52.9439	-75.6555	46.3471	-103.891	66.4	0.4	65	temperate lowland forest	2	2. temperate lowland forest	River Section
	uncertain	11	uncertain	63	uncertain	101	Erlingdorfia montana	90	172	Angiosperm	1	Maas	2	Johnson, 2002	8	NULL	Hell Creek	8	53.6401	-70.6025	53.7998	-72.7363	52.9439	-75.6555	46.3471	-103.891	66.4	0.4	65	coastal plain	4	4. coastal plain	River Section
	Magnoliopsida	6	Rosales	51	Rhamnaceae	81	Rhamnus cleburni	205	466	Angiosperm	1	Maas	2	Johnson, 2002	8	NULL	Hell Creek	8	53.6401	-70.6025	53.7998	-72.7363	52.9439	-75.6555	46.3471	-103.891	66.4	0.4	65	temperate lowland forest	2	2. temperate lowland forest	River Section
	Magnoliopsida	6	Laurales	31	Lauraceae	51	Cissites acerifolia	51	88	Angiosperm	1	Maas	2	Johnson, 2002	8	NULL	Hell Creek	8	53.6401	-70.6025	53.7998	-72.7363	52.9439	-75.6555	46.3471	-103.891	66.4	0.4	65	upland forest	1	1. upland forest	River Section
	uncertain	11	uncertain	63	uncertain	101	Erlingdorfia montana	89	172	Angiosperm	1	Maas	2	Johnson, 2002	8	NULL	Hell Creek	8	53.6401	-70.6025	53.7998	-72.7363	52.9439	-75.6555	46.3471	-103.891	66.4	0.4	65	coastal plain	4	4. coastal plain	River Section
	Magnoliopsida	6	Magnoliales	34	Magnoliaceae	55	Magnoliaceae, unknown 3 (HC66)	128	298	Angiosperm	1	Maas	2	Johnson, 2002	8	NULL	Hell Creek	8	53.6401	-70.6025	53.7998	-72.7363	52.9439	-75.6555	46.3471	-103.891	66.4	0.4	65	tropical lowland forest	6	6. tropical lowland forest	River Section
	Pinopsida	9	Pinales	42	Cupressaceae	24	Taxodium olrikii	231	536	Gymnosperm	3	Maas	2	Johnson, 2002	8	NULL	Hell Creek	8	53.6401	-70.6025	53.7998	-72.7363	52.9439	-75.6555	46.3471	-103.891	66.4	0.4	65	wet, successional	5	5. wet, successional	River Section
	Magnoliopsida	6	Trochodendrales/Cercidiphyllales	59	uncertain	101	Trochodendrales, unknown 1 (HC73)	237	545	Angiosperm	1	Maas	2	Johnson, 2002	8	NULL	Hell Creek	8	53.6401	-70.6025	53.7998	-72.7363	52.9439	-75.6555	46.3471	-103.891	66.4	0.4	65	tropical lowland forest	6	6. tropical lowland forest	River Section
	Liliopsida	4	Alismatales	1	Araceae	7	Pistia corrugata	180	384	Angiosperm	1	Maas	2	Johnson, 2002	8	NULL	Hell Creek	8	53.6401	-70.6025	53.7998	-72.7363	52.9439	-75.6555	46.3471	-103.891	66.4	0.4	65	estuarine, aquatic	7	7. estuarine, aquatic	River Section
	Magnoliopsida	6	Saxifragales	55	Hamamelidaceae?	47	Leepierceia preartocarpoides	117	277	Angiosperm	1	Maas	2	Johnson, 2002	8	NULL	Hell Creek	8	53.6401	-70.6025	53.7998	-72.7363	52.9439	-75.6555	46.3471	-103.891	66.4	0.4	65	coastal plain	4	4. coastal plain	River Section
	Magnoliopsida	6	Laurales	31	Lauraceae	51	Cinnamomum lineafolia	50	84	Angiosperm	1	Maas	2	Johnson, 2002	8	NULL	Hell Creek	8	53.6401	-70.6025	53.7998	-72.7363	52.9439	-75.6555	46.3471	-103.891	66.4	0.4	65	tropical lowland forest	6	6. tropical lowland forest	River Section
	Magnoliopsida	6	Celastrales	8	Celastraceae	18	Celastrus taurenensis	43	69	Angiosperm	1	Maas	2	Johnson, 2002	8	NULL	Hell Creek	8	53.6401	-70.6025	53.7998	-72.7363	52.9439	-75.6555	46.3471	-103.891	66.4	0.4	65	tropical lowland forest	6	6. tropical lowland forest	River Section
	Magnoliopsida	6	Proteales	47	Platanaceae	72	Platanaceae sp. 2	181	388	Angiosperm	1	Maas	2	Johnson, 2002	8	NULL	Hell Creek	8	53.6401	-70.6025	53.7998	-72.7363	52.9439	-75.6555	46.3471	-103.891	66.4	0.4	65	temperate lowland forest	2	2. temperate lowland forest	River Section
	Magnoliopsida	6	Proteales	47	Platanaceae	72	Platanaceae sp. 3	181	389	Angiosperm	1	Maas	2	Johnson, 2002	8	NULL	Hell Creek	8	53.6401	-70.6025	53.7998	-72.7363	52.9439	-75.6555	46.3471	-103.891	66.4	0.4	65	temperate lowland forest	2	2. temperate lowland forest	River Section
	Magnoliopsida	6	Fagales	22	Fagaceae	39	Fagaceae, unknown 1 (HC100)	91	173	Angiosperm	1	Maas	2	Johnson, 2002	8	NULL	Hell Creek	8	53.6401	-70.6025	53.7998	-72.7363	52.9439	-75.6555	46.3471	-103.891	66.4	0.4	65	temperate lowland forest	2	2. temperate lowland forest	River Section
	Magnoliopsida	6	Trochodendrales/Cercidiphyllales	59	uncertain	101	Trochodendroides nebrascensis	238	546	Angiosperm	1	Maas	2	Johnson, 2002	8	NULL	Hell Creek	8	53.6401	-70.6025	53.7998	-72.7363	52.9439	-75.6555	46.3471	-103.891	66.4	0.4	65	tropical lowland forest	6	6. tropical lowland forest	River Section
	Magnoliopsida	6	Laurales	31	Lauraceae	51	Marmarthia trivialis	138	314	Angiosperm	1	Maas	2	Johnson, 2002	8	NULL	Hell Creek	8	53.6401	-70.6025	53.7998	-72.7363	52.9439	-75.6555	46.3471	-103.891	66.4	0.4	65	tropical lowland forest	6	6. tropical lowland forest	River Section
	Magnoliopsida	6	Proteales	47	Platanaceae	72	Platanites marginata	182	413	Angiosperm	1	Maas	2	Johnson, 2002	8	NULL	Hell Creek	8	53.6401	-70.6025	53.7998	-72.7363	52.9439	-75.6555	46.3471	-103.891	66.4	0.4	65	temperate lowland forest	2	2. temperate lowland forest	River Section
	Magnoliopsida	6	Vitales	61	Vitaceae	96	Vitis stantonii	244	567	Angiosperm	1	Maas	2	Johnson, 2002	8	NULL	Hell Creek	8	53.6401	-70.6025	53.7998	-72.7363	52.9439	-75.6555	46.3471	-103.891	66.4	0.4	65	temperate lowland forest	2	2. temperate lowland forest	River Section
	Magnoliopsida	6	Nymphaeales	40	Nymphaeaceae	64	Paranymphaea hastata	165	360	Angiosperm	1	Maas	2	Johnson, 2002	8	NULL	Hell Creek	8	53.6401	-70.6025	53.7998	-72.7363	52.9439	-75.6555	46.3471	-103.891	66.4	0.4	65	estuarine, aquatic	7	7. estuarine, aquatic	River Section
	Marchantiopsida	8	Marchantiales	38	Marchantiaceae	58	Marchantia pealii	136	310	Fern/Moss	2	Maas	2	Johnson, 2002	8	NULL	Hell Creek	8	53.6401	-70.6025	53.7998	-72.7363	52.9439	-75.6555	46.3471	-103.891	66.4	0.4	65	tropical lowland forest	6	6. tropical lowland forest	River Section
	Magnoliopsida	6	Saxifragales	55	Cercidiphyllaceae	20	Cercidiphyllum sp.	47	77	Angiosperm	1	Maas	2	Johnson, 2002	8	NULL	Hell Creek	8	53.6401	-70.6025	53.7998	-72.7363	52.9439	-75.6555	46.3471	-103.891	66.4	0.4	65	temperate lowland forest	2	2. temperate lowland forest	River Section
	Magnoliopsida	6	Dilleniales	16	Dilleniaceae	31	Pinnate Dilleniidae, unknown 1 (HC127)	176	380	Angiosperm	1	Maas	2	Johnson, 2002	8	NULL	Hell Creek	8	53.6401	-70.6025	53.7998	-72.7363	52.9439	-75.6555	46.3471	-103.891	66.4	0.4	65	unknown	0	0. unknown	River Section
	Pinopsida	9	Pinales	42	Cupressaceae	24	Fokieniopsis catenulata	97	218	Gymnosperm	3	Maas	2	Johnson, 2002	8	NULL	Hell Creek	8	53.6401	-70.6025	53.7998	-72.7363	52.9439	-75.6555	46.3471	-103.891	66.4	0.4	65	temperate lowland forest	2	2. temperate lowland forest	River Section
	Magnoliopsida	6	Proteales	47	Platanaceae	72	Platanaceae, unknown 12 (HC151)	181	401	Angiosperm	1	Maas	2	Johnson, 2002	8	NULL	Hell Creek	8	53.6401	-70.6025	53.7998	-72.7363	52.9439	-75.6555	46.3471	-103.891	66.4	0.4	65	temperate lowland forest	2	2. temperate lowland forest	River Section
	Magnoliopsida	6	Laurales	31	Lauraceae	51	Marmarthia pearsonii	138	313	Angiosperm	1	Maas	2	Johnson, 2002	8	NULL	Hell Creek	8	53.6401	-70.6025	53.7998	-72.7363	52.9439	-75.6555	46.3471	-103.891	66.4	0.4	65	tropical lowland forest	6	6. tropical lowland forest	River Section
	Magnoliopsida	6	Laurales	31	uncertain	101	Laurales, unknown 6 (HC163)	112	256	Angiosperm	1	Maas	2	Johnson, 2002	8	NULL	Hell Creek	8	53.6401	-70.6025	53.7998	-72.7363	52.9439	-75.6555	46.3471	-103.891	66.4	0.4	65	tropical lowland forest	6	6. tropical lowland forest	River Section
	Cycadopsida	2	Bennettitales	5	Cycadeoideaceae	26	Nilssonia yukonensis	154	342	Gymnosperm	3	Maas	2	Johnson, 2002	8	NULL	Hell Creek	8	53.6401	-70.6025	53.7998	-72.7363	52.9439	-75.6555	46.3471	-103.891	66.4	0.4	65	tropical lowland forest	6	6. tropical lowland forest	River Section
	Pinopsida	9	Pinales	42	Cupressaceae	24	Elatides longifolia	84	167	Gymnosperm	3	Maas	2	Johnson, 2002	8	NULL	Hell Creek	8	53.6401	-70.6025	53.7998	-72.7363	52.9439	-75.6555	46.3471	-103.891	66.4	0.4	65	temperate lowland forest	2	2. temperate lowland forest	River Section
	Magnoliopsida	6	Magnoliales	34	Magnoliaceae?	56	Liriodendrites bradacii	122	283	Angiosperm	1	Maas	2	Johnson, 2002	8	NULL	Hell Creek	8	53.6401	-70.6025	53.7998	-72.7363	52.9439	-75.6555	46.3471	-103.891	66.4	0.4	65	coastal plain	4	4. coastal plain	River Section
	Magnoliopsida	6	Rosales	51	Rhamnaceae	81	Ziziphus fibrillosus	255	581	Angiosperm	1	Maas	2	Johnson, 2002	8	NULL	Hell Creek	8	53.6401	-70.6025	53.7998	-72.7363	52.9439	-75.6555	46.3471	-103.891	66.4	0.4	65	tropical lowland forest	6	6. tropical lowland forest	River Section
	Magnoliopsida	6	Laurales	31	Lauraceae	51	Cissites lobata	51	90	Angiosperm	1	Maas	2	Johnson, 2002	8	NULL	Hell Creek	8	53.6401	-70.6025	53.7998	-72.7363	52.9439	-75.6555	46.3471	-103.891	66.4	0.4	65	upland forest	1	1. upland forest	River Section
	Magnoliopsida	6	Rosales	51	Moraceae	61	Artocarpus lessigiana	19	25	Angiosperm	1	Maas	2	Johnson, 2002	8	NULL	Hell Creek	8	53.6401	-70.6025	53.7998	-72.7363	52.9439	-75.6555	46.3471	-103.891	66.4	0.4	65	tropical lowland forest	6	6. tropical lowland forest	River Section
	Magnoliopsida	6	Ranunculales	48	Berberidaceae	12	Berberidaceae, unknown 1 (HC188)	27	40	Angiosperm	1	Maas	2	Johnson, 2002	8	NULL	Hell Creek	8	53.6401	-70.6025	53.7998	-72.7363	52.9439	-75.6555	46.3471	-103.891	66.4	0.4	65	temperate lowland forest	2	2. temperate lowland forest	River Section
	Magnoliopsida	6	Vitales	61	Vitaceae	96	Vitis stantonii	244	567	Angiosperm	1	Maas	2	Johnson, 2002	8	NULL	Hell Creek	8	53.6401	-70.6025	53.7998	-72.7363	52.9439	-75.6555	46.3471	-103.891	66.4	0.4	65	temperate lowland forest	2	2. temperate lowland forest	River Section
	Polypodiopsida	10	Filicales	23	uncertain	101	Filicales, unknown 4 (HC190)	93	210	Fern/Moss	2	Maas	2	Johnson, 2002	8	NULL	Hell Creek	8	53.6401	-70.6025	53.7998	-72.7363	52.9439	-75.6555	46.3471	-103.891	66.4	0.4	65	unknown	0	0. unknown	River Section
	Magnoliopsida	6	Laurales?	32	Lauraceae?	52	Bisonia niemii	30	43	Angiosperm	1	Maas	2	Johnson, 2002	8	NULL	Hell Creek	8	53.6401	-70.6025	53.7998	-72.7363	52.9439	-75.6555	46.3471	-103.891	66.4	0.4	65	unknown	0	0. unknown	River Section
	Magnoliopsida	6	Magnoliales	34	Magnoliaceae?	56	Liriodendron sp.	123	285	Angiosperm	1	Maas	2	Johnson, 2002	8	NULL	Hell Creek	8	53.6401	-70.6025	53.7998	-72.7363	52.9439	-75.6555	46.3471	-103.891	66.4	0.4	65	coastal plain	4	4. coastal plain	River Section
	Magnoliopsida	6	Magnoliales	34	Magnoliaceae?	56	Liriodendron sp.	123	285	Angiosperm	1	Maas	2	Johnson, 2002	8	NULL	Hell Creek	8	53.6401	-70.6025	53.7998	-72.7363	52.9439	-75.6555	46.3471	-103.891	66.4	0.4	65	coastal plain	4	4. coastal plain	River Section
	Pinopsida	9	uncertain	63	Dammaritaceae	28	Dammarites sp.	71	128	Gymnosperm	3	Maas	2	Johnson, 2002	8	NULL	Hell Creek	8	53.6401	-70.6025	53.7998	-72.7363	52.9439	-75.6555	46.3471	-103.891	66.4	0.4	65	temperate lowland forest	2	2. temperate lowland forest	River Section
	Magnoliopsida	6	Rosales	51	Rhamnaceae	81	Rhamnaceae, unknown (HC261)	202	464	Angiosperm	1	Maas	2	Johnson, 2002	8	NULL	Hell Creek	8	53.6401	-70.6025	53.7998	-72.7363	52.9439	-75.6555	46.3471	-103.891	66.4	0.4	65	tropical lowland forest	6	6. tropical lowland forest	River Section
	Magnoliopsida	6	Laurales	31	uncertain	101	Laurales, unknown (HC265)	112	249	Angiosperm	1	Maas	2	Johnson, 2002	8	NULL	Hell Creek	8	53.6401	-70.6025	53.7998	-72.7363	52.9439	-75.6555	46.3471	-103.891	66.4	0.4	65	tropical lowland forest	6	6. tropical lowland forest	River Section
	Polypodiopsida	10	Filicales	23	uncertain	101	Filicales, unknown	93	206	Fern/Moss	2	Maas	2	Johnson, 2002	8	NULL	Hell Creek	8	53.6401	-70.6025	53.7998	-72.7363	52.9439	-75.6555	46.3471	-103.891	66.4	0.4	65	unknown	0	0. unknown	River Section
	Magnoliopsida	6	Proteales	47	Platanaceae	72	Platanaceae, unknown	181	395	Angiosperm	1	Maas	2	Johnson, 2002	8	NULL	Hell Creek	8	53.6401	-70.6025	53.7998	-72.7363	52.9439	-75.6555	46.3471	-103.891	66.4	0.4	65	temperate lowland forest	2	2. temperate lowland forest	River Section
	Pinopsida	9	Pinales	42	uncertain	101	Pinales, unknown	173	378	Gymnosperm	3	Maas	2	Johnson, 2002	8	NULL	Hell Creek	8	53.6401	-70.6025	53.7998	-72.7363	52.9439	-75.6555	46.3471	-103.891	66.4	0.4	65	unknown	0	0. unknown	River Section
	Magnoliopsida	6	Proteales	47	Platanaceae	72	Platanaceae sp. 10	181	386	Angiosperm	1	Maas	2	Johnson, 2002	8	NULL	Hell Creek	8	53.6401	-70.6025	53.7998	-72.7363	52.9439	-75.6555	46.3471	-103.891	66.4	0.4	65	temperate lowland forest	2	2. temperate lowland forest	River Section
	Magnoliopsida	6	Proteales	47	Platanaceae	72	Platanaceae sp. 11	181	387	Angiosperm	1	Maas	2	Johnson, 2002	8	NULL	Hell Creek	8	53.6401	-70.6025	53.7998	-72.7363	52.9439	-75.6555	46.3471	-103.891	66.4	0.4	65	temperate lowland forest	2	2. temperate lowland forest	River Section
	Pinopsida	9	Pinales	42	Cupressaceae	24	Glyptostrobus europaeus	102	229	Gymnosperm	3	Maas	2	Johnson, 2002	8	NULL	Hell Creek	8	53.5909	-70.612	53.7506	-72.7448	52.8946	-75.6623	46.2989	-103.876	66.4	0.4	65	swampy, lagoonal	3	3. swampy, lagoonal	Bobcat Butte
	Liliopsida	4	Arecales	3	Arecaceae	9	Amesoneuron or Sabalites sp.	4	3	Angiosperm	1	Maas	2	Johnson, 2002	8	NULL	Hell Creek	8	53.5909	-70.612	53.7506	-72.7448	52.8946	-75.6623	46.2989	-103.876	66.4	0.4	65	unknown	0	0. unknown	Bobcat Butte
	Magnoliopsida	6	Proteales	47	Platanaceae	72	Platanaceae	181	385	Angiosperm	1	Maas	2	Johnson, 2002	8	NULL	Hell Creek	8	53.5909	-70.612	53.7506	-72.7448	52.8946	-75.6623	46.2989	-103.876	66.4	0.4	65	temperate lowland forest	2	2. temperate lowland forest	Bobcat Butte
	Magnoliopsida	6	Proteales	47	Platanaceae	72	Platanites marginata	182	413	Angiosperm	1	Maas	2	Johnson, 2002	8	NULL	Hell Creek	8	53.5909	-70.612	53.7506	-72.7448	52.8946	-75.6623	46.2989	-103.876	66.4	0.4	65	temperate lowland forest	2	2. temperate lowland forest	Bobcat Butte
	Magnoliopsida	6	Proteales	47	Platanaceae	72	Grewiopsis saportana	103	234	Angiosperm	1	Maas	2	Johnson, 2002	8	NULL	Hell Creek	8	53.5909	-70.612	53.7506	-72.7448	52.8946	-75.6623	46.2989	-103.876	66.4	0.4	65	temperate lowland forest	2	2. temperate lowland forest	Bobcat Butte
	Magnoliopsida	6	Rosales	51	Moraceae	61	Ficus planicostata	92	190	Angiosperm	1	Maas	2	Johnson, 2002	8	NULL	Hell Creek	8	53.5909	-70.612	53.7506	-72.7448	52.8946	-75.6623	46.2989	-103.876	66.4	0.4	65	tropical lowland forest	6	6. tropical lowland forest	Bobcat Butte
	Magnoliopsida	6	Ranunculales	48	Papaveraceae	68	Palaeoaster inquirenda	160	355	Angiosperm	1	Maas	2	Johnson, 2002	8	NULL	Hell Creek	8	53.5909	-70.612	53.7506	-72.7448	52.8946	-75.6623	46.2989	-103.876	66.4	0.4	65	temperate lowland forest	2	2. temperate lowland forest	Bobcat Butte
	Pinopsida	9	Pinales	42	Cupressaceae	24	Glyptostrobus sp.	102	231	Gymnosperm	3	Maas	2	Johnson, 2002	8	NULL	Hell Creek	8	53.5909	-70.612	53.7506	-72.7448	52.8946	-75.6623	46.2989	-103.876	66.4	0.4	65	swampy, lagoonal	3	3. swampy, lagoonal	Bobcat Butte
	Magnoliopsida	6	Vitales	61	Vitaceae	96	Vitis stantonii	244	567	Angiosperm	1	Maas	2	Johnson, 2002	8	NULL	Hell Creek	8	53.5909	-70.612	53.7506	-72.7448	52.8946	-75.6623	46.2989	-103.876	66.4	0.4	65	temperate lowland forest	2	2. temperate lowland forest	Bobcat Butte
	Magnoliopsida	6	Laurales?	32	uncertain	101	Laurales?, unknown 1 (HC32)	113	260	Angiosperm	1	Maas	2	Johnson, 2002	8	NULL	Hell Creek	8	53.5909	-70.612	53.7506	-72.7448	52.8946	-75.6623	46.2989	-103.876	66.4	0.4	65	tropical lowland forest	6	6. tropical lowland forest	Bobcat Butte
	Pinopsida	9	Pinales	42	Cupressaceae	24	Metasequoia sp.	144	325	Gymnosperm	3	Maas	2	Johnson, 2002	8	NULL	Hell Creek	8	53.5909	-70.612	53.7506	-72.7448	52.8946	-75.6623	46.2989	-103.876	66.4	0.4	65	temperate lowland forest	2	2. temperate lowland forest	Bobcat Butte
	Magnoliopsida	6	Rosales	51	Ulmaceae	93	Ulmaceae, unknown 1 (HC36)	240	549	Angiosperm	1	Maas	2	Johnson, 2002	8	NULL	Hell Creek	8	53.5909	-70.612	53.7506	-72.7448	52.8946	-75.6623	46.2989	-103.876	66.4	0.4	65	temperate lowland forest	2	2. temperate lowland forest	Bobcat Butte
	Magnoliopsida	6	Magnoliales	34	Magnoliaceae	55	Magnoliaceae, unknown 2 (HC43)	128	297	Angiosperm	1	Maas	2	Johnson, 2002	8	NULL	Hell Creek	8	53.5909	-70.612	53.7506	-72.7448	52.8946	-75.6623	46.2989	-103.876	66.4	0.4	65	tropical lowland forest	6	6. tropical lowland forest	Bobcat Butte
	Magnoliopsida	6	Fagales	22	Fagaceae	39	Dryophyllum tenneseensis	81	164	Angiosperm	1	Maas	2	Johnson, 2002	8	NULL	Hell Creek	8	53.5909	-70.612	53.7506	-72.7448	52.8946	-75.6623	46.2989	-103.876	66.4	0.4	65	temperate lowland forest	2	2. temperate lowland forest	Bobcat Butte
	Magnoliopsida	6	Rosales?	52	uncertain	101	Rosidae, unknown 2 (HC47)	210	480	Angiosperm	1	Maas	2	Johnson, 2002	8	NULL	Hell Creek	8	53.5909	-70.612	53.7506	-72.7448	52.8946	-75.6623	46.2989	-103.876	66.4	0.4	65	unknown	0	0. unknown	Bobcat Butte
	Magnoliopsida	6	Fagales	22	Fagaceae	39	Dryophyllum subfalcatum	81	163	Angiosperm	1	Maas	2	Johnson, 2002	8	NULL	Hell Creek	8	53.5909	-70.612	53.7506	-72.7448	52.8946	-75.6623	46.2989	-103.876	66.4	0.4	65	temperate lowland forest	2	2. temperate lowland forest	Bobcat Butte
	Magnoliopsida	6	Rosales?	52	Ulmaceae?	94	Carpites ulmiformes	34	56	Angiosperm	1	Maas	2	Johnson, 2002	8	NULL	Hell Creek	8	53.5909	-70.612	53.7506	-72.7448	52.8946	-75.6623	46.2989	-103.876	66.4	0.4	65	temperate lowland forest	2	2. temperate lowland forest	Bobcat Butte
	uncertain	11	uncertain	63	uncertain	101	Erlingdorfia montana	90	172	Angiosperm	1	Maas	2	Johnson, 2002	8	NULL	Hell Creek	8	53.5909	-70.612	53.7506	-72.7448	52.8946	-75.6623	46.2989	-103.876	66.4	0.4	65	coastal plain	4	4. coastal plain	Bobcat Butte
	Magnoliopsida	6	Laurales	31	uncertain	101	Araliaephyllum polevoi	12	16	Angiosperm	1	Maas	2	Johnson, 2002	8	NULL	Hell Creek	8	53.5909	-70.612	53.7506	-72.7448	52.8946	-75.6623	46.2989	-103.876	66.4	0.4	65	coastal plain	4	4. coastal plain	Bobcat Butte
	Magnoliopsida	6	Rosales	51	Rhamnaceae	81	Rhamnus cleburni	205	466	Angiosperm	1	Maas	2	Johnson, 2002	8	NULL	Hell Creek	8	53.5909	-70.612	53.7506	-72.7448	52.8946	-75.6623	46.2989	-103.876	66.4	0.4	65	temperate lowland forest	2	2. temperate lowland forest	Bobcat Butte
	Magnoliopsida	6	Laurales	31	Lauraceae	51	Cissites acerifolia	51	88	Angiosperm	1	Maas	2	Johnson, 2002	8	NULL	Hell Creek	8	53.5909	-70.612	53.7506	-72.7448	52.8946	-75.6623	46.2989	-103.876	66.4	0.4	65	upland forest	1	1. upland forest	Bobcat Butte
	uncertain	11	uncertain	63	uncertain	101	Erlingdorfia montana	89	172	Angiosperm	1	Maas	2	Johnson, 2002	8	NULL	Hell Creek	8	53.5909	-70.612	53.7506	-72.7448	52.8946	-75.6623	46.2989	-103.876	66.4	0.4	65	coastal plain	4	4. coastal plain	Bobcat Butte
	Magnoliopsida	6	Magnoliales	34	Magnoliaceae	55	Magnoliaceae, unknown 3 (HC66)	128	298	Angiosperm	1	Maas	2	Johnson, 2002	8	NULL	Hell Creek	8	53.5909	-70.612	53.7506	-72.7448	52.8946	-75.6623	46.2989	-103.876	66.4	0.4	65	tropical lowland forest	6	6. tropical lowland forest	Bobcat Butte
	Pinopsida	9	Pinales	42	Cupressaceae	24	Sequoia sp.	225	527	Gymnosperm	3	Maas	2	Johnson, 2002	8	NULL	Hell Creek	8	53.5909	-70.612	53.7506	-72.7448	52.8946	-75.6623	46.2989	-103.876	66.4	0.4	65	temperate lowland forest	2	2. temperate lowland forest	Bobcat Butte
	Pinopsida	9	Pinales	42	Cupressaceae	24	Taxodium olrikii	231	536	Gymnosperm	3	Maas	2	Johnson, 2002	8	NULL	Hell Creek	8	53.5909	-70.612	53.7506	-72.7448	52.8946	-75.6623	46.2989	-103.876	66.4	0.4	65	wet, successional	5	5. wet, successional	Bobcat Butte
	Magnoliopsida	6	Dilleniales	16	Dilleniaceae	31	Palmate Dilleniidae, unknown 1 (HC72)	162	357	Angiosperm	1	Maas	2	Johnson, 2002	8	NULL	Hell Creek	8	53.5909	-70.612	53.7506	-72.7448	52.8946	-75.6623	46.2989	-103.876	66.4	0.4	65	unknown	0	0. unknown	Bobcat Butte
	Magnoliopsida	6	Trochodendrales/Cercidiphyllales	59	uncertain	101	Trochodendrales, unknown	237	543	Angiosperm	1	Maas	2	Johnson, 2002	8	NULL	Hell Creek	8	53.5909	-70.612	53.7506	-72.7448	52.8946	-75.6623	46.2989	-103.876	66.4	0.4	65	tropical lowland forest	6	6. tropical lowland forest	Bobcat Butte
	Liliopsida	4	Alismatales	1	Araceae	7	Pistia corrugata	180	384	Angiosperm	1	Maas	2	Johnson, 2002	8	NULL	Hell Creek	8	53.5909	-70.612	53.7506	-72.7448	52.8946	-75.6623	46.2989	-103.876	66.4	0.4	65	estuarine, aquatic	7	7. estuarine, aquatic	Bobcat Butte
	Polypodiopsida	10	Filicales	23	uncertain	101	Filicales, unknown	93	206	Fern/Moss	2	Maas	2	Johnson, 2002	8	NULL	Hell Creek	8	53.5909	-70.612	53.7506	-72.7448	52.8946	-75.6623	46.2989	-103.876	66.4	0.4	65	unknown	0	0. unknown	Bobcat Butte
	Magnoliopsida	6	Rosales	51	Rosaceae	82	Rosaceae, unknown 1 (HC80)	209	475	Angiosperm	1	Maas	2	Johnson, 2002	8	NULL	Hell Creek	8	53.5909	-70.612	53.7506	-72.7448	52.8946	-75.6623	46.2989	-103.876	66.4	0.4	65	unknown	0	0. unknown	Bobcat Butte
	Magnoliopsida	6	Rosales	51	Cannabaceae	16	Cannabaceae, unknown 1 (HC81)	33	47	Angiosperm	1	Maas	2	Johnson, 2002	8	NULL	Hell Creek	8	53.5909	-70.612	53.7506	-72.7448	52.8946	-75.6623	46.2989	-103.876	66.4	0.4	65	temperate lowland forest	2	2. temperate lowland forest	Bobcat Butte
	Pinopsida	9	Pinales	42	Araucariaceae	8	Araucariaceae, uknown 1 (HC83)	14	19	Gymnosperm	3	Maas	2	Johnson, 2002	8	NULL	Hell Creek	8	53.5909	-70.612	53.7506	-72.7448	52.8946	-75.6623	46.2989	-103.876	66.4	0.4	65	coastal plain	4	4. coastal plain	Bobcat Butte
	Magnoliopsida	6	Laurales	31	uncertain	101	Laurales, unknown 2 (HC84)	112	252	Angiosperm	1	Maas	2	Johnson, 2002	8	NULL	Hell Creek	8	53.5909	-70.612	53.7506	-72.7448	52.8946	-75.6623	46.2989	-103.876	66.4	0.4	65	tropical lowland forest	6	6. tropical lowland forest	Bobcat Butte
	Magnoliopsida	6	Saxifragales	55	Hamamelidaceae?	47	Leepierceia preartocarpoides	117	277	Angiosperm	1	Maas	2	Johnson, 2002	8	NULL	Hell Creek	8	53.5909	-70.612	53.7506	-72.7448	52.8946	-75.6623	46.2989	-103.876	66.4	0.4	65	coastal plain	4	4. coastal plain	Bobcat Butte
	Magnoliopsida	6	Laurales	31	uncertain	101	Laurales, unknown 3 (HC87)	112	253	Angiosperm	1	Maas	2	Johnson, 2002	8	NULL	Hell Creek	8	53.5909	-70.612	53.7506	-72.7448	52.8946	-75.6623	46.2989	-103.876	66.4	0.4	65	tropical lowland forest	6	6. tropical lowland forest	Bobcat Butte
	Magnoliopsida	6	Laurales	31	Chloranthaceae	22	Chloranthaceae, unknown 1 (HC88)	48	79	Angiosperm	1	Maas	2	Johnson, 2002	8	NULL	Hell Creek	8	53.5909	-70.612	53.7506	-72.7448	52.8946	-75.6623	46.2989	-103.876	66.4	0.4	65	tropical lowland forest	6	6. tropical lowland forest	Bobcat Butte
	Magnoliopsida	6	Rosales?	52	uncertain	101	Rosidae, unknown 3 (HC90)	210	481	Angiosperm	1	Maas	2	Johnson, 2002	8	NULL	Hell Creek	8	53.5909	-70.612	53.7506	-72.7448	52.8946	-75.6623	46.2989	-103.876	66.4	0.4	65	unknown	0	0. unknown	Bobcat Butte
	Magnoliopsida	6	Laurales	31	Lauraceae	51	Cinnamomum lineafolia	50	84	Angiosperm	1	Maas	2	Johnson, 2002	8	NULL	Hell Creek	8	53.5909	-70.612	53.7506	-72.7448	52.8946	-75.6623	46.2989	-103.876	66.4	0.4	65	tropical lowland forest	6	6. tropical lowland forest	Bobcat Butte
	Magnoliopsida	6	Rosales	51	Urticaceae	95	Urticaceae, unknown 1 (HC93)	242	552	Angiosperm	1	Maas	2	Johnson, 2002	8	NULL	Hell Creek	8	53.5909	-70.612	53.7506	-72.7448	52.8946	-75.6623	46.2989	-103.876	66.4	0.4	65	unknown	0	0. unknown	Bobcat Butte
	Magnoliopsida	6	Celastrales	8	Celastraceae	18	Celastrus taurenensis	43	69	Angiosperm	1	Maas	2	Johnson, 2002	8	NULL	Hell Creek	8	53.5909	-70.612	53.7506	-72.7448	52.8946	-75.6623	46.2989	-103.876	66.4	0.4	65	tropical lowland forest	6	6. tropical lowland forest	Bobcat Butte
	Magnoliopsida	6	Proteales	47	Platanaceae	72	Platanaceae sp. 2	181	388	Angiosperm	1	Maas	2	Johnson, 2002	8	NULL	Hell Creek	8	53.5909	-70.612	53.7506	-72.7448	52.8946	-75.6623	46.2989	-103.876	66.4	0.4	65	temperate lowland forest	2	2. temperate lowland forest	Bobcat Butte
	Magnoliopsida	6	Proteales	47	Platanaceae	72	Platanaceae sp. 3	181	389	Angiosperm	1	Maas	2	Johnson, 2002	8	NULL	Hell Creek	8	53.5909	-70.612	53.7506	-72.7448	52.8946	-75.6623	46.2989	-103.876	66.4	0.4	65	temperate lowland forest	2	2. temperate lowland forest	Bobcat Butte
	Magnoliopsida	6	Trochodendrales/Cercidiphyllales	59	uncertain	101	Trochodendroides nebrascensis	238	546	Angiosperm	1	Maas	2	Johnson, 2002	8	NULL	Hell Creek	8	53.5909	-70.612	53.7506	-72.7448	52.8946	-75.6623	46.2989	-103.876	66.4	0.4	65	tropical lowland forest	6	6. tropical lowland forest	Bobcat Butte
	Magnoliopsida	6	Laurales	31	Lauraceae	51	Marmarthia trivialis	138	314	Angiosperm	1	Maas	2	Johnson, 2002	8	NULL	Hell Creek	8	53.5909	-70.612	53.7506	-72.7448	52.8946	-75.6623	46.2989	-103.876	66.4	0.4	65	tropical lowland forest	6	6. tropical lowland forest	Bobcat Butte
	Magnoliopsida	6	Proteales	47	Platanaceae	72	Platanites marginata	182	413	Angiosperm	1	Maas	2	Johnson, 2002	8	NULL	Hell Creek	8	53.5909	-70.612	53.7506	-72.7448	52.8946	-75.6623	46.2989	-103.876	66.4	0.4	65	temperate lowland forest	2	2. temperate lowland forest	Bobcat Butte
	Magnoliopsida	6	Vitales	61	Vitaceae	96	Vitis stantonii	244	567	Angiosperm	1	Maas	2	Johnson, 2002	8	NULL	Hell Creek	8	53.5909	-70.612	53.7506	-72.7448	52.8946	-75.6623	46.2989	-103.876	66.4	0.4	65	temperate lowland forest	2	2. temperate lowland forest	Bobcat Butte
	Magnoliopsida	6	Nymphaeales	40	Nymphaeaceae	64	Paranymphaea hastata	165	360	Angiosperm	1	Maas	2	Johnson, 2002	8	NULL	Hell Creek	8	53.5909	-70.612	53.7506	-72.7448	52.8946	-75.6623	46.2989	-103.876	66.4	0.4	65	estuarine, aquatic	7	7. estuarine, aquatic	Bobcat Butte
	Ginkgoopsida	3	Ginkgoales	26	Ginkgoaceae	42	Ginkgo adiantoides	100	223	Gymnosperm	3	Maas	2	Johnson, 2002	8	NULL	Hell Creek	8	53.5909	-70.612	53.7506	-72.7448	52.8946	-75.6623	46.2989	-103.876	66.4	0.4	65	temperate lowland forest	2	2. temperate lowland forest	Bobcat Butte
	Magnoliopsida	6	Laurales	31	uncertain	101	Laurales, unknown (HC122)	112	248	Angiosperm	1	Maas	2	Johnson, 2002	8	NULL	Hell Creek	8	53.5909	-70.612	53.7506	-72.7448	52.8946	-75.6623	46.2989	-103.876	66.4	0.4	65	tropical lowland forest	6	6. tropical lowland forest	Bobcat Butte
	Marchantiopsida	8	Marchantiales	38	Marchantiaceae	58	Marchantia pealii	136	310	Fern/Moss	2	Maas	2	Johnson, 2002	8	NULL	Hell Creek	8	53.5909	-70.612	53.7506	-72.7448	52.8946	-75.6623	46.2989	-103.876	66.4	0.4	65	tropical lowland forest	6	6. tropical lowland forest	Bobcat Butte
	Magnoliopsida	6	Saxifragales	55	Cercidiphyllaceae	20	Cercidiphyllum sp.	47	77	Angiosperm	1	Maas	2	Johnson, 2002	8	NULL	Hell Creek	8	53.5909	-70.612	53.7506	-72.7448	52.8946	-75.6623	46.2989	-103.876	66.4	0.4	65	temperate lowland forest	2	2. temperate lowland forest	Bobcat Butte
	Magnoliopsida	6	Dilleniales	16	Dilleniaceae	31	Pinnate Dilleniidae, unknown 1 (HC127)	175	380	Angiosperm	1	Maas	2	Johnson, 2002	8	NULL	Hell Creek	8	53.5909	-70.612	53.7506	-72.7448	52.8946	-75.6623	46.2989	-103.876	66.4	0.4	65	unknown	0	0. unknown	Bobcat Butte
	Polypodiopsida	10	Salviniales	53	Hydropteridiaceae	49	Hydropteris pinnata	109	240	Fern/Moss	2	Maas	2	Johnson, 2002	8	NULL	Hell Creek	8	53.5909	-70.612	53.7506	-72.7448	52.8946	-75.6623	46.2989	-103.876	66.4	0.4	65	estuarine, aquatic	7	7. estuarine, aquatic	Bobcat Butte
	Magnoliopsida	6	Rosales?	52	uncertain	101	Rosidae, unknown 4 (HC132)	210	483	Angiosperm	1	Maas	2	Johnson, 2002	8	NULL	Hell Creek	8	53.5909	-70.612	53.7506	-72.7448	52.8946	-75.6623	46.2989	-103.876	66.4	0.4	65	unknown	0	0. unknown	Bobcat Butte
	Pinopsida	9	Pinales	42	Cupressaceae	24	Fokieniopsis catenulata	97	218	Gymnosperm	3	Maas	2	Johnson, 2002	8	NULL	Hell Creek	8	53.5909	-70.612	53.7506	-72.7448	52.8946	-75.6623	46.2989	-103.876	66.4	0.4	65	temperate lowland forest	2	2. temperate lowland forest	Bobcat Butte
	Magnoliopsida	6	Rosales?	52	uncertain	101	Rosidae, unknown 5 (HC138)	210	485	Angiosperm	1	Maas	2	Johnson, 2002	8	NULL	Hell Creek	8	53.5909	-70.612	53.7506	-72.7448	52.8946	-75.6623	46.2989	-103.876	66.4	0.4	65	unknown	0	0. unknown	Bobcat Butte
	Magnoliopsida	6	Proteales	47	uncertain	101	Proteales, unknown 2 (HC139)	192	443	Angiosperm	1	Maas	2	Johnson, 2002	8	NULL	Hell Creek	8	53.5909	-70.612	53.7506	-72.7448	52.8946	-75.6623	46.2989	-103.876	66.4	0.4	65	unknown	0	0. unknown	Bobcat Butte
	Magnoliopsida	6	Proteales	47	Platanaceae	72	Platanaceae, unknown 10 (HC140)	181	399	Angiosperm	1	Maas	2	Johnson, 2002	8	NULL	Hell Creek	8	53.5909	-70.612	53.7506	-72.7448	52.8946	-75.6623	46.2989	-103.876	66.4	0.4	65	temperate lowland forest	2	2. temperate lowland forest	Bobcat Butte
	Magnoliopsida	6	Rosales?	52	uncertain	101	Rosidae, unknown 6 (HC142)	210	486	Angiosperm	1	Maas	2	Johnson, 2002	8	NULL	Hell Creek	8	53.5909	-70.612	53.7506	-72.7448	52.8946	-75.6623	46.2989	-103.876	66.4	0.4	65	unknown	0	0. unknown	Bobcat Butte
	Magnoliopsida	6	Proteales	47	Platanaceae	72	Platanaceae sp. 5	181	390	Angiosperm	1	Maas	2	Johnson, 2002	8	NULL	Hell Creek	8	53.5909	-70.612	53.7506	-72.7448	52.8946	-75.6623	46.2989	-103.876	66.4	0.4	65	temperate lowland forest	2	2. temperate lowland forest	Bobcat Butte
	Magnoliopsida	6	Laurales	31	Lauraceae	51	Marmarthia pearsonii	138	313	Angiosperm	1	Maas	2	Johnson, 2002	8	NULL	Hell Creek	8	53.5909	-70.612	53.7506	-72.7448	52.8946	-75.6623	46.2989	-103.876	66.4	0.4	65	tropical lowland forest	6	6. tropical lowland forest	Bobcat Butte
	Magnoliopsida	6	Laurales	31	uncertain	101	Laurales, unknown 6 (HC163)	112	256	Angiosperm	1	Maas	2	Johnson, 2002	8	NULL	Hell Creek	8	53.5909	-70.612	53.7506	-72.7448	52.8946	-75.6623	46.2989	-103.876	66.4	0.4	65	tropical lowland forest	6	6. tropical lowland forest	Bobcat Butte
	Magnoliopsida	6	Magnoliales	34	Magnoliaceae?	56	Liriodendrites bradacii	122	283	Angiosperm	1	Maas	2	Johnson, 2002	8	NULL	Hell Creek	8	53.5909	-70.612	53.7506	-72.7448	52.8946	-75.6623	46.2989	-103.876	66.4	0.4	65	coastal plain	4	4. coastal plain	Bobcat Butte
	Magnoliopsida	6	Laurales	31	uncertain	101	Laurales, unknown 7 (HC168)	112	257	Angiosperm	1	Maas	2	Johnson, 2002	8	NULL	Hell Creek	8	53.5909	-70.612	53.7506	-72.7448	52.8946	-75.6623	46.2989	-103.876	66.4	0.4	65	tropical lowland forest	6	6. tropical lowland forest	Bobcat Butte
	Magnoliopsida	6	Rosales	51	Rhamnaceae	81	Ziziphus fibrillosus	255	581	Angiosperm	1	Maas	2	Johnson, 2002	8	NULL	Hell Creek	8	53.5909	-70.612	53.7506	-72.7448	52.8946	-75.6623	46.2989	-103.876	66.4	0.4	65	tropical lowland forest	6	6. tropical lowland forest	Bobcat Butte
	Magnoliopsida	6	Laurales	31	Lauraceae	51	Cissites lobata	51	90	Angiosperm	1	Maas	2	Johnson, 2002	8	NULL	Hell Creek	8	53.5909	-70.612	53.7506	-72.7448	52.8946	-75.6623	46.2989	-103.876	66.4	0.4	65	upland forest	1	1. upland forest	Bobcat Butte
	Magnoliopsida	6	Rosales	51	Moraceae	61	Artocarpus lessigiana	19	25	Angiosperm	1	Maas	2	Johnson, 2002	8	NULL	Hell Creek	8	53.5909	-70.612	53.7506	-72.7448	52.8946	-75.6623	46.2989	-103.876	66.4	0.4	65	tropical lowland forest	6	6. tropical lowland forest	Bobcat Butte
	Magnoliopsida	6	Laurales	31	uncertain	101	Laurales, unknown 8 (HC199)	112	258	Angiosperm	1	Maas	2	Johnson, 2002	8	NULL	Hell Creek	8	53.5909	-70.612	53.7506	-72.7448	52.8946	-75.6623	46.2989	-103.876	66.4	0.4	65	tropical lowland forest	6	6. tropical lowland forest	Bobcat Butte
	Magnoliopsida	6	Proteales	47	Platanaceae	72	Platanaceae sp. 8	181	393	Angiosperm	1	Maas	2	Johnson, 2002	8	NULL	Hell Creek	8	53.5909	-70.612	53.7506	-72.7448	52.8946	-75.6623	46.2989	-103.876	66.4	0.4	65	temperate lowland forest	2	2. temperate lowland forest	Bobcat Butte
	Magnoliopsida	6	Rosales?	52	uncertain	101	Rosidae, unknown 8 (HC211)	210	488	Angiosperm	1	Maas	2	Johnson, 2002	8	NULL	Hell Creek	8	53.5909	-70.612	53.7506	-72.7448	52.8946	-75.6623	46.2989	-103.876	66.4	0.4	65	unknown	0	0. unknown	Bobcat Butte
	Magnoliopsida	6	Magnoliales	34	Magnoliaceae?	56	Liriodendron sp.	123	285	Angiosperm	1	Maas	2	Johnson, 2002	8	NULL	Hell Creek	8	53.5909	-70.612	53.7506	-72.7448	52.8946	-75.6623	46.2989	-103.876	66.4	0.4	65	coastal plain	4	4. coastal plain	Bobcat Butte
	Magnoliopsida	6	Proteales	47	Platanaceae	72	Platanaceae sp. 9	181	394	Angiosperm	1	Maas	2	Johnson, 2002	8	NULL	Hell Creek	8	53.5909	-70.612	53.7506	-72.7448	52.8946	-75.6623	46.2989	-103.876	66.4	0.4	65	temperate lowland forest	2	2. temperate lowland forest	Bobcat Butte
	Polypodiopsida	10	Filicales	23	uncertain	101	Filicales, unknown	93	206	Fern/Moss	2	Maas	2	Johnson, 2002	8	NULL	Hell Creek	8	53.5909	-70.612	53.7506	-72.7448	52.8946	-75.6623	46.2989	-103.876	66.4	0.4	65	unknown	0	0. unknown	Bobcat Butte
	Pinopsida	9	Pinales	42	Cupressaceae	24	Cupressaceae, unknown (HC219)	63	116	Gymnosperm	3	Maas	2	Johnson, 2002	8	NULL	Hell Creek	8	53.5909	-70.612	53.7506	-72.7448	52.8946	-75.6623	46.2989	-103.876	66.4	0.4	65	temperate lowland forest	2	2. temperate lowland forest	Bobcat Butte
	Pinopsida	9	Pinales	42	Cupressaceae	24	Cupressaceae, unknown (HC220)	63	117	Gymnosperm	3	Maas	2	Johnson, 2002	8	NULL	Hell Creek	8	53.5909	-70.612	53.7506	-72.7448	52.8946	-75.6623	46.2989	-103.876	66.4	0.4	65	temperate lowland forest	2	2. temperate lowland forest	Bobcat Butte
	Magnoliopsida	6	Rosales?	52	uncertain	101	Rosidae, unknown 9 (HC224)	210	489	Angiosperm	1	Maas	2	Johnson, 2002	8	NULL	Hell Creek	8	53.5909	-70.612	53.7506	-72.7448	52.8946	-75.6623	46.2989	-103.876	66.4	0.4	65	unknown	0	0. unknown	Bobcat Butte
	Magnoliopsida	6	Rosales	51	Cannabaceae	16	Cannabaceae, unknown 2	33	48	Angiosperm	1	Maas	2	Johnson, 2002	8	NULL	Hell Creek	8	53.5909	-70.612	53.7506	-72.7448	52.8946	-75.6623	46.2989	-103.876	66.4	0.4	65	temperate lowland forest	2	2. temperate lowland forest	Bobcat Butte
	Magnoliopsida	6	Ranunculales	48	Ranunculaceae	80	Ranunculaceae, unknown (HC226)	199	461	Angiosperm	1	Maas	2	Johnson, 2002	8	NULL	Hell Creek	8	53.5909	-70.612	53.7506	-72.7448	52.8946	-75.6623	46.2989	-103.876	66.4	0.4	65	unknown	0	0. unknown	Bobcat Butte
	Magnoliopsida	6	Ranunculales?	49	uncertain	101	Ranunculidae, unknown (HC227)	200	462	Angiosperm	1	Maas	2	Johnson, 2002	8	NULL	Hell Creek	8	53.5909	-70.612	53.7506	-72.7448	52.8946	-75.6623	46.2989	-103.876	66.4	0.4	65	unknown	0	0. unknown	Bobcat Butte
	Magnoliopsida	6	Rosales	51	Urticaceae	95	Urticaceae, unknown (HC228)	242	551	Angiosperm	1	Maas	2	Johnson, 2002	8	NULL	Hell Creek	8	53.5909	-70.612	53.7506	-72.7448	52.8946	-75.6623	46.2989	-103.876	66.4	0.4	65	unknown	0	0. unknown	Bobcat Butte
	Magnoliopsida	6	Saxifragales	55	Cercidiphyllaceae	20	Cercidiphyllales, unknown (HC229)	46	73	Angiosperm	1	Maas	2	Johnson, 2002	8	NULL	Hell Creek	8	53.5909	-70.612	53.7506	-72.7448	52.8946	-75.6623	46.2989	-103.876	66.4	0.4	65	temperate lowland forest	2	2. temperate lowland forest	Bobcat Butte
	Magnoliopsida	6	Rosales?	52	uncertain	101	Rosidae, unknown 10 (HC232)	210	477	Angiosperm	1	Maas	2	Johnson, 2002	8	NULL	Hell Creek	8	53.5909	-70.612	53.7506	-72.7448	52.8946	-75.6623	46.2989	-103.876	66.4	0.4	65	unknown	0	0. unknown	Bobcat Butte
	Magnoliopsida	6	Rosales?	52	uncertain	101	Rosidae, unknown 11 (HC233)	210	478	Angiosperm	1	Maas	2	Johnson, 2002	8	NULL	Hell Creek	8	53.5909	-70.612	53.7506	-72.7448	52.8946	-75.6623	46.2989	-103.876	66.4	0.4	65	unknown	0	0. unknown	Bobcat Butte
	Magnoliopsida	6	Rosales?	52	uncertain	101	Rosidae, unknown 12 (HC234)	210	479	Angiosperm	1	Maas	2	Johnson, 2002	8	NULL	Hell Creek	8	53.5909	-70.612	53.7506	-72.7448	52.8946	-75.6623	46.2989	-103.876	66.4	0.4	65	unknown	0	0. unknown	Bobcat Butte
	Pinopsida	9	Pinales	42	uncertain	101	Coniferales, unknown (HC240)	56	97	Angiosperm	1	Maas	2	Johnson, 2002	8	NULL	Hell Creek	8	53.5909	-70.612	53.7506	-72.7448	52.8946	-75.6623	46.2989	-103.876	66.4	0.4	65	unknown	0	0. unknown	Bobcat Butte
	Polypodiopsida	10	Filicales	23	uncertain	101	Filicales, unknown	93	206	Fern/Moss	2	Maas	2	Johnson, 2002	8	NULL	Hell Creek	8	53.5909	-70.612	53.7506	-72.7448	52.8946	-75.6623	46.2989	-103.876	66.4	0.4	65	unknown	0	0. unknown	Bobcat Butte
	Magnoliopsida	6	Rosales	51	Rhamnaceae	81	Rhamnaceae, unknown (HC261)	202	464	Angiosperm	1	Maas	2	Johnson, 2002	8	NULL	Hell Creek	8	53.5909	-70.612	53.7506	-72.7448	52.8946	-75.6623	46.2989	-103.876	66.4	0.4	65	tropical lowland forest	6	6. tropical lowland forest	Bobcat Butte
	Polypodiopsida	10	Filicales	23	uncertain	101	Filicales, unknown	93	206	Fern/Moss	2	Maas	2	Johnson, 2002	8	NULL	Hell Creek	8	53.5909	-70.612	53.7506	-72.7448	52.8946	-75.6623	46.2989	-103.876	66.4	0.4	65	unknown	0	0. unknown	Bobcat Butte
	Magnoliopsida	6	Magnoliales?	35	uncertain	101	Quereuxia angulata	198	460	Angiosperm	1	Maas	2	Johnson, 2002	8	NULL	Hell Creek	8	53.4371	-70.6236	53.5967	-72.7531	52.7407	-75.6659	46.1513	-103.812	66.4	0.4	65	estuarine, aquatic	7	7. estuarine, aquatic	Sunset Butte
	Pinopsida	9	Pinales	42	Cupressaceae	24	Metasequoia occidentalis	144	323	Gymnosperm	3	Maas	2	Johnson, 2002	8	NULL	Hell Creek	8	53.4371	-70.6236	53.5967	-72.7531	52.7407	-75.6659	46.1513	-103.812	66.4	0.4	65	temperate lowland forest	2	2. temperate lowland forest	Sunset Butte
	Magnoliopsida	6	Saxifragales	55	Cercidiphyllaceae	20	Cercidiphyllum genetrix	47	76	Angiosperm	1	Maas	2	Johnson, 2002	8	NULL	Hell Creek	8	53.4371	-70.6236	53.5967	-72.7531	52.7407	-75.6659	46.1513	-103.812	66.4	0.4	65	temperate lowland forest	2	2. temperate lowland forest	Sunset Butte
	Magnoliopsida	6	Malpighiales	36	Salicaceae	84	Populus nebrascensis	189	436	Angiosperm	1	Maas	2	Johnson, 2002	8	NULL	Hell Creek	8	53.4371	-70.6236	53.5967	-72.7531	52.7407	-75.6659	46.1513	-103.812	66.4	0.4	65	wet, successional	5	5. wet, successional	Sunset Butte
	Magnoliopsida	6	Magnoliales?	35	uncertain	101	Dicotylophyllum anomalum	75	150	Angiosperm	1	Maas	2	Johnson, 2002	8	NULL	Hell Creek	8	53.4371	-70.6236	53.5967	-72.7531	52.7407	-75.6659	46.1513	-103.812	66.4	0.4	65	temperate lowland forest	2	2. temperate lowland forest	Sunset Butte
	Magnoliopsida	6	Cornales (Umbellales)	12	Cornaceae	23	Cornophyllum newberryi	58	100	Angiosperm	1	Maas	2	Johnson, 2002	8	NULL	Hell Creek	8	53.4371	-70.6236	53.5967	-72.7531	52.7407	-75.6659	46.1513	-103.812	66.4	0.4	65	tropical lowland forest	6	6. tropical lowland forest	Sunset Butte
	Liliopsida	4	Arecales	3	Arecaceae	9	Amesoneuron or Sabalites sp.	4	3	Angiosperm	1	Maas	2	Johnson, 2002	8	NULL	Hell Creek	8	53.4371	-70.6236	53.5967	-72.7531	52.7407	-75.6659	46.1513	-103.812	66.4	0.4	65	unknown	0	0. unknown	Sunset Butte
	Liliopsida	4	Alismatales	1	Araceae	7	Limnobiophyllum scutatum	121	282	Angiosperm	1	Maas	2	Johnson, 2002	8	NULL	Hell Creek	8	53.4371	-70.6236	53.5967	-72.7531	52.7407	-75.6659	46.1513	-103.812	66.4	0.4	65	estuarine, aquatic	7	7. estuarine, aquatic	Sunset Butte
	Magnoliopsida	6	uncertain	63	uncertain	101	Ziziphoides flabella	254	580	Angiosperm	1	Maas	2	Johnson, 2002	8	NULL	Hell Creek	8	53.4371	-70.6236	53.5967	-72.7531	52.7407	-75.6659	46.1513	-103.812	66.4	0.4	65	tropical lowland forest	6	6. tropical lowland forest	Sunset Butte
	Polypodiopsida	10	Salviniales	53	Cercidiphyllaceae	20	Nyssidium arcticum	156	345	Angiosperm	1	Maas	2	Johnson, 2002	8	NULL	Hell Creek	8	53.4371	-70.6236	53.5967	-72.7531	52.7407	-75.6659	46.1513	-103.812	66.4	0.4	65	wet, successional	5	5. wet, successional	Sunset Butte
	Magnoliopsida	6	Proteales	47	Nelumbonaceae	63	Nelumbium montanum	152	336	Angiosperm	1	Maas	2	Johnson, 2002	8	NULL	Hell Creek	8	53.4371	-70.6236	53.5967	-72.7531	52.7407	-75.6659	46.1513	-103.812	66.4	0.4	65	estuarine, aquatic	7	7. estuarine, aquatic	Sunset Butte
	Magnoliopsida	6	Proteales	47	Platanaceae	72	Platanites marginata	182	413	Angiosperm	1	Maas	2	Johnson, 2002	8	NULL	Hell Creek	8	53.4371	-70.6236	53.5967	-72.7531	52.7407	-75.6659	46.1513	-103.812	66.4	0.4	65	temperate lowland forest	2	2. temperate lowland forest	Sunset Butte
	Magnoliopsida	6	Proteales	47	Platanaceae	72	Grewiopsis saportana	103	234	Angiosperm	1	Maas	2	Johnson, 2002	8	NULL	Hell Creek	8	53.4371	-70.6236	53.5967	-72.7531	52.7407	-75.6659	46.1513	-103.812	66.4	0.4	65	temperate lowland forest	2	2. temperate lowland forest	Sunset Butte
	Magnoliopsida	6	Rosales	51	Moraceae	61	Ficus planicostata	92	190	Angiosperm	1	Maas	2	Johnson, 2002	8	NULL	Hell Creek	8	53.4371	-70.6236	53.5967	-72.7531	52.7407	-75.6659	46.1513	-103.812	66.4	0.4	65	tropical lowland forest	6	6. tropical lowland forest	Sunset Butte
	Magnoliopsida	6	Ranunculales	48	Papaveraceae	68	Palaeoaster inquirenda	160	355	Angiosperm	1	Maas	2	Johnson, 2002	8	NULL	Hell Creek	8	53.4371	-70.6236	53.5967	-72.7531	52.7407	-75.6659	46.1513	-103.812	66.4	0.4	65	temperate lowland forest	2	2. temperate lowland forest	Sunset Butte
	Polypodiopsida	10	Filicales	23	uncertain	101	Filicales, unknown	93	206	Fern/Moss	2	Maas	2	Johnson, 2002	8	NULL	Hell Creek	8	53.4371	-70.6236	53.5967	-72.7531	52.7407	-75.6659	46.1513	-103.812	66.4	0.4	65	unknown	0	0. unknown	Sunset Butte
	Pinopsida	9	Pinales	42	Cupressaceae	24	Glyptostrobus sp.	102	231	Gymnosperm	3	Maas	2	Johnson, 2002	8	NULL	Hell Creek	8	53.4371	-70.6236	53.5967	-72.7531	52.7407	-75.6659	46.1513	-103.812	66.4	0.4	65	swampy, lagoonal	3	3. swampy, lagoonal	Sunset Butte
	Magnoliopsida	6	Vitales	61	Vitaceae	96	Vitis stantonii	244	567	Angiosperm	1	Maas	2	Johnson, 2002	8	NULL	Hell Creek	8	53.4371	-70.6236	53.5967	-72.7531	52.7407	-75.6659	46.1513	-103.812	66.4	0.4	65	temperate lowland forest	2	2. temperate lowland forest	Sunset Butte
	Magnoliopsida	6	Laurales?	32	uncertain	101	Laurales?, unknown 1 (HC32)	113	260	Angiosperm	1	Maas	2	Johnson, 2002	8	NULL	Hell Creek	8	53.4371	-70.6236	53.5967	-72.7531	52.7407	-75.6659	46.1513	-103.812	66.4	0.4	65	tropical lowland forest	6	6. tropical lowland forest	Sunset Butte
	Pinopsida	9	Pinales	42	Cupressaceae	24	Metasequoia sp.	144	325	Gymnosperm	3	Maas	2	Johnson, 2002	8	NULL	Hell Creek	8	53.4371	-70.6236	53.5967	-72.7531	52.7407	-75.6659	46.1513	-103.812	66.4	0.4	65	temperate lowland forest	2	2. temperate lowland forest	Sunset Butte
	Magnoliopsida	6	Rosales	51	Ulmaceae	93	Ulmaceae, unknown 1 (HC36)	240	549	Angiosperm	1	Maas	2	Johnson, 2002	8	NULL	Hell Creek	8	53.4371	-70.6236	53.5967	-72.7531	52.7407	-75.6659	46.1513	-103.812	66.4	0.4	65	temperate lowland forest	2	2. temperate lowland forest	Sunset Butte
	Magnoliopsida	6	Magnoliales	34	Magnoliaceae	55	Magnoliaceae, unknown 2 (HC43)	128	297	Angiosperm	1	Maas	2	Johnson, 2002	8	NULL	Hell Creek	8	53.4371	-70.6236	53.5967	-72.7531	52.7407	-75.6659	46.1513	-103.812	66.4	0.4	65	tropical lowland forest	6	6. tropical lowland forest	Sunset Butte
	Magnoliopsida	6	Fagales	22	Fagaceae	39	Dryophyllum tenneseensis	81	164	Angiosperm	1	Maas	2	Johnson, 2002	8	NULL	Hell Creek	8	53.4371	-70.6236	53.5967	-72.7531	52.7407	-75.6659	46.1513	-103.812	66.4	0.4	65	temperate lowland forest	2	2. temperate lowland forest	Sunset Butte
	Magnoliopsida	6	Fagales	22	Fagaceae	39	Dryophyllum subfalcatum	81	163	Angiosperm	1	Maas	2	Johnson, 2002	8	NULL	Hell Creek	8	53.4371	-70.6236	53.5967	-72.7531	52.7407	-75.6659	46.1513	-103.812	66.4	0.4	65	temperate lowland forest	2	2. temperate lowland forest	Sunset Butte
	Magnoliopsida	6	Proteales	47	Platanaceae	72	Platanaceae, unknown 5 (HC52)	181	408	Angiosperm	1	Maas	2	Johnson, 2002	8	NULL	Hell Creek	8	53.4371	-70.6236	53.5967	-72.7531	52.7407	-75.6659	46.1513	-103.812	66.4	0.4	65	temperate lowland forest	2	2. temperate lowland forest	Sunset Butte
	uncertain	11	uncertain	63	uncertain	101	Erlingdorfia montana	90	172	Angiosperm	1	Maas	2	Johnson, 2002	8	NULL	Hell Creek	8	53.4371	-70.6236	53.5967	-72.7531	52.7407	-75.6659	46.1513	-103.812	66.4	0.4	65	coastal plain	4	4. coastal plain	Sunset Butte
	Magnoliopsida	6	Laurales	31	uncertain	101	Araliaephyllum polevoi	12	16	Angiosperm	1	Maas	2	Johnson, 2002	8	NULL	Hell Creek	8	53.4371	-70.6236	53.5967	-72.7531	52.7407	-75.6659	46.1513	-103.812	66.4	0.4	65	coastal plain	4	4. coastal plain	Sunset Butte
	Magnoliopsida	6	Rosales	51	Rhamnaceae	81	Rhamnus cleburni	205	466	Angiosperm	1	Maas	2	Johnson, 2002	8	NULL	Hell Creek	8	53.4371	-70.6236	53.5967	-72.7531	52.7407	-75.6659	46.1513	-103.812	66.4	0.4	65	temperate lowland forest	2	2. temperate lowland forest	Sunset Butte
	Magnoliopsida	6	Laurales	31	Lauraceae	51	Cissites acerifolia	51	88	Angiosperm	1	Maas	2	Johnson, 2002	8	NULL	Hell Creek	8	53.4371	-70.6236	53.5967	-72.7531	52.7407	-75.6659	46.1513	-103.812	66.4	0.4	65	upland forest	1	1. upland forest	Sunset Butte
	Magnoliopsida	6	Magnoliales	34	Magnoliaceae	55	Magnoliaceae, unknown 3 (HC66)	128	298	Angiosperm	1	Maas	2	Johnson, 2002	8	NULL	Hell Creek	8	53.4371	-70.6236	53.5967	-72.7531	52.7407	-75.6659	46.1513	-103.812	66.4	0.4	65	tropical lowland forest	6	6. tropical lowland forest	Sunset Butte
	Pinopsida	9	Pinales	42	Cupressaceae	24	Taxodium olrikii	231	536	Gymnosperm	3	Maas	2	Johnson, 2002	8	NULL	Hell Creek	8	53.4371	-70.6236	53.5967	-72.7531	52.7407	-75.6659	46.1513	-103.812	66.4	0.4	65	wet, successional	5	5. wet, successional	Sunset Butte
	Liliopsida	4	Alismatales	1	Araceae	7	Pistia corrugata	180	384	Angiosperm	1	Maas	2	Johnson, 2002	8	NULL	Hell Creek	8	53.4371	-70.6236	53.5967	-72.7531	52.7407	-75.6659	46.1513	-103.812	66.4	0.4	65	estuarine, aquatic	7	7. estuarine, aquatic	Sunset Butte
	Magnoliopsida	6	Rosales	51	Rosaceae	82	Rosaceae, unknown 1 (HC80)	209	475	Angiosperm	1	Maas	2	Johnson, 2002	8	NULL	Hell Creek	8	53.4371	-70.6236	53.5967	-72.7531	52.7407	-75.6659	46.1513	-103.812	66.4	0.4	65	unknown	0	0. unknown	Sunset Butte
	Pinopsida	9	Pinales	42	Araucariaceae	8	Araucariaceae, uknown 1 (HC83)	14	19	Gymnosperm	3	Maas	2	Johnson, 2002	8	NULL	Hell Creek	8	53.4371	-70.6236	53.5967	-72.7531	52.7407	-75.6659	46.1513	-103.812	66.4	0.4	65	coastal plain	4	4. coastal plain	Sunset Butte
	Magnoliopsida	6	Saxifragales	55	Hamamelidaceae?	47	Leepierceia preartocarpoides	117	277	Angiosperm	1	Maas	2	Johnson, 2002	8	NULL	Hell Creek	8	53.4371	-70.6236	53.5967	-72.7531	52.7407	-75.6659	46.1513	-103.812	66.4	0.4	65	coastal plain	4	4. coastal plain	Sunset Butte
	Magnoliopsida	6	Celastrales	8	Celastraceae	18	Celastrus taurenensis	43	69	Angiosperm	1	Maas	2	Johnson, 2002	8	NULL	Hell Creek	8	53.4371	-70.6236	53.5967	-72.7531	52.7407	-75.6659	46.1513	-103.812	66.4	0.4	65	tropical lowland forest	6	6. tropical lowland forest	Sunset Butte
	Magnoliopsida	6	Proteales	47	Platanaceae	72	Platanaceae, unknown 7 (HC99)	181	410	Angiosperm	1	Maas	2	Johnson, 2002	8	NULL	Hell Creek	8	53.4371	-70.6236	53.5967	-72.7531	52.7407	-75.6659	46.1513	-103.812	66.4	0.4	65	temperate lowland forest	2	2. temperate lowland forest	Sunset Butte
	Magnoliopsida	6	Trochodendrales/Cercidiphyllales	59	uncertain	101	Trochodendroides nebrascensis	238	546	Angiosperm	1	Maas	2	Johnson, 2002	8	NULL	Hell Creek	8	53.4371	-70.6236	53.5967	-72.7531	52.7407	-75.6659	46.1513	-103.812	66.4	0.4	65	tropical lowland forest	6	6. tropical lowland forest	Sunset Butte
	Magnoliopsida	6	Laurales	31	Lauraceae	51	Marmarthia trivialis	138	314	Angiosperm	1	Maas	2	Johnson, 2002	8	NULL	Hell Creek	8	53.4371	-70.6236	53.5967	-72.7531	52.7407	-75.6659	46.1513	-103.812	66.4	0.4	65	tropical lowland forest	6	6. tropical lowland forest	Sunset Butte
	Magnoliopsida	6	Proteales	47	Platanaceae	72	Platanites marginata	182	413	Angiosperm	1	Maas	2	Johnson, 2002	8	NULL	Hell Creek	8	53.4371	-70.6236	53.5967	-72.7531	52.7407	-75.6659	46.1513	-103.812	66.4	0.4	65	temperate lowland forest	2	2. temperate lowland forest	Sunset Butte
	Magnoliopsida	6	Vitales	61	Vitaceae	96	Vitis stantonii	244	567	Angiosperm	1	Maas	2	Johnson, 2002	8	NULL	Hell Creek	8	53.4371	-70.6236	53.5967	-72.7531	52.7407	-75.6659	46.1513	-103.812	66.4	0.4	65	temperate lowland forest	2	2. temperate lowland forest	Sunset Butte
	Magnoliopsida	6	Nymphaeales	40	Nymphaeaceae	64	Paranymphaea hastata	165	360	Angiosperm	1	Maas	2	Johnson, 2002	8	NULL	Hell Creek	8	53.4371	-70.6236	53.5967	-72.7531	52.7407	-75.6659	46.1513	-103.812	66.4	0.4	65	estuarine, aquatic	7	7. estuarine, aquatic	Sunset Butte
	Ginkgoopsida	3	Ginkgoales	26	Ginkgoaceae	42	Ginkgo adiantoides	100	223	Gymnosperm	3	Maas	2	Johnson, 2002	8	NULL	Hell Creek	8	53.4371	-70.6236	53.5967	-72.7531	52.7407	-75.6659	46.1513	-103.812	66.4	0.4	65	temperate lowland forest	2	2. temperate lowland forest	Sunset Butte
	Magnoliopsida	6	Saxifragales	55	Cercidiphyllaceae	20	Cercidiphyllum sp. (HC124)	47	78	Angiosperm	1	Maas	2	Johnson, 2002	8	NULL	Hell Creek	8	53.4371	-70.6236	53.5967	-72.7531	52.7407	-75.6659	46.1513	-103.812	66.4	0.4	65	temperate lowland forest	2	2. temperate lowland forest	Sunset Butte
	Polypodiopsida	10	Salviniales	53	Hydropteridiaceae	49	Hydropteris pinnata	109	240	Fern/Moss	2	Maas	2	Johnson, 2002	8	NULL	Hell Creek	8	53.4371	-70.6236	53.5967	-72.7531	52.7407	-75.6659	46.1513	-103.812	66.4	0.4	65	estuarine, aquatic	7	7. estuarine, aquatic	Sunset Butte
	Pinopsida	9	Pinales	42	Cupressaceae	24	Fokieniopsis catenulata	97	218	Gymnosperm	3	Maas	2	Johnson, 2002	8	NULL	Hell Creek	8	53.4371	-70.6236	53.5967	-72.7531	52.7407	-75.6659	46.1513	-103.812	66.4	0.4	65	temperate lowland forest	2	2. temperate lowland forest	Sunset Butte
	Magnoliopsida	6	Proteales	47	Platanaceae	72	Platanaceae sp. 5	181	390	Angiosperm	1	Maas	2	Johnson, 2002	8	NULL	Hell Creek	8	53.4371	-70.6236	53.5967	-72.7531	52.7407	-75.6659	46.1513	-103.812	66.4	0.4	65	temperate lowland forest	2	2. temperate lowland forest	Sunset Butte
	Magnoliopsida	6	Proteales	47	Platanaceae	72	Platanaceae sp. 6	181	391	Angiosperm	1	Maas	2	Johnson, 2002	8	NULL	Hell Creek	8	53.4371	-70.6236	53.5967	-72.7531	52.7407	-75.6659	46.1513	-103.812	66.4	0.4	65	temperate lowland forest	2	2. temperate lowland forest	Sunset Butte
	Magnoliopsida	6	Laurales	31	Lauraceae	51	Marmarthia pearsonii	138	313	Angiosperm	1	Maas	2	Johnson, 2002	8	NULL	Hell Creek	8	53.4371	-70.6236	53.5967	-72.7531	52.7407	-75.6659	46.1513	-103.812	66.4	0.4	65	tropical lowland forest	6	6. tropical lowland forest	Sunset Butte
	Cycadopsida	2	Bennettitales	5	Cycadeoideaceae	26	Nilssonia yukonensis	154	342	Gymnosperm	3	Maas	2	Johnson, 2002	8	NULL	Hell Creek	8	53.4371	-70.6236	53.5967	-72.7531	52.7407	-75.6659	46.1513	-103.812	66.4	0.4	65	tropical lowland forest	6	6. tropical lowland forest	Sunset Butte
	Pinopsida	9	Pinales	42	uncertain	101	Elatides longifolia	84	167	Gymnosperm	3	Maas	2	Johnson, 2002	8	NULL	Hell Creek	8	53.4371	-70.6236	53.5967	-72.7531	52.7407	-75.6659	46.1513	-103.812	66.4	0.4	65	temperate lowland forest	2	2. temperate lowland forest	Sunset Butte
	Magnoliopsida	6	Magnoliales	34	Magnoliaceae?	56	Liriodendrites bradacii	122	283	Angiosperm	1	Maas	2	Johnson, 2002	8	NULL	Hell Creek	8	53.4371	-70.6236	53.5967	-72.7531	52.7407	-75.6659	46.1513	-103.812	66.4	0.4	65	coastal plain	4	4. coastal plain	Sunset Butte
	Magnoliopsida	6	Laurales	31	uncertain	101	Laurales, unknown 7 (HC168)	112	257	Angiosperm	1	Maas	2	Johnson, 2002	8	NULL	Hell Creek	8	53.4371	-70.6236	53.5967	-72.7531	52.7407	-75.6659	46.1513	-103.812	66.4	0.4	65	tropical lowland forest	6	6. tropical lowland forest	Sunset Butte
	Magnoliopsida	6	Laurales	31	Lauraceae	51	Cissites lobata	51	90	Angiosperm	1	Maas	2	Johnson, 2002	8	NULL	Hell Creek	8	53.4371	-70.6236	53.5967	-72.7531	52.7407	-75.6659	46.1513	-103.812	66.4	0.4	65	upland forest	1	1. upland forest	Sunset Butte
	Magnoliopsida	6	Rosales	51	Moraceae	61	Artocarpus lessigiana	19	25	Angiosperm	1	Maas	2	Johnson, 2002	8	NULL	Hell Creek	8	53.4371	-70.6236	53.5967	-72.7531	52.7407	-75.6659	46.1513	-103.812	66.4	0.4	65	tropical lowland forest	6	6. tropical lowland forest	Sunset Butte
	Magnoliopsida	6	Vitales	61	Vitaceae	96	Vitis stantonii	244	567	Angiosperm	1	Maas	2	Johnson, 2002	8	NULL	Hell Creek	8	53.4371	-70.6236	53.5967	-72.7531	52.7407	-75.6659	46.1513	-103.812	66.4	0.4	65	temperate lowland forest	2	2. temperate lowland forest	Sunset Butte
	Polypodiopsida	10	Filicales	23	uncertain	101	Filicales, unknown	93	206	Fern/Moss	2	Maas	2	Johnson, 2002	8	NULL	Hell Creek	8	53.4371	-70.6236	53.5967	-72.7531	52.7407	-75.6659	46.1513	-103.812	66.4	0.4	65	unknown	0	0. unknown	Sunset Butte
	Magnoliopsida	6	Rosales?	52	uncertain	101	Rosidae, unknown 6 (HC194)	210	487	Angiosperm	1	Maas	2	Johnson, 2002	8	NULL	Hell Creek	8	53.4371	-70.6236	53.5967	-72.7531	52.7407	-75.6659	46.1513	-103.812	66.4	0.4	65	unknown	0	0. unknown	Sunset Butte
	Liliopsida	4	Zingiberales	62	Zingiberaceae	100	Zingiberopsis attenuata	253	578	Angiosperm	1	Maas	2	Johnson, 2002	8	NULL	Hell Creek	8	53.4371	-70.6236	53.5967	-72.7531	52.7407	-75.6659	46.1513	-103.812	66.4	0.4	65	tropical lowland forest	6	6. tropical lowland forest	Sunset Butte
	Magnoliopsida	6	Proteales	47	Platanaceae	72	Platanaceae sp. 6	181	391	Angiosperm	1	Maas	2	Johnson, 2002	8	NULL	Hell Creek	8	53.4371	-70.6236	53.5967	-72.7531	52.7407	-75.6659	46.1513	-103.812	66.4	0.4	65	temperate lowland forest	2	2. temperate lowland forest	Sunset Butte
	Magnoliopsida	6	Proteales	47	Platanaceae	72	Platanaceae sp. 7	181	392	Angiosperm	1	Maas	2	Johnson, 2002	8	NULL	Hell Creek	8	53.4371	-70.6236	53.5967	-72.7531	52.7407	-75.6659	46.1513	-103.812	66.4	0.4	65	temperate lowland forest	2	2. temperate lowland forest	Sunset Butte
	Magnoliopsida	6	Proteales	47	Platanaceae	72	Platanaceae sp. 8	181	393	Angiosperm	1	Maas	2	Johnson, 2002	8	NULL	Hell Creek	8	53.4371	-70.6236	53.5967	-72.7531	52.7407	-75.6659	46.1513	-103.812	66.4	0.4	65	temperate lowland forest	2	2. temperate lowland forest	Sunset Butte
	Magnoliopsida	6	Rosales?	52	uncertain	101	Rosidae, unknown 9 (HC224)	210	489	Angiosperm	1	Maas	2	Johnson, 2002	8	NULL	Hell Creek	8	53.4371	-70.6236	53.5967	-72.7531	52.7407	-75.6659	46.1513	-103.812	66.4	0.4	65	unknown	0	0. unknown	Sunset Butte
	Magnoliopsida	6	Ranunculales	48	Ranunculaceae	80	Ranunculaceae, unknown (HC226)	199	461	Angiosperm	1	Maas	2	Johnson, 2002	8	NULL	Hell Creek	8	53.4371	-70.6236	53.5967	-72.7531	52.7407	-75.6659	46.1513	-103.812	66.4	0.4	65	unknown	0	0. unknown	Sunset Butte
	Magnoliopsida	6	Proteales	47	Platanaceae	72	Platanaceae sp. 11	181	387	Angiosperm	1	Maas	2	Johnson, 2002	8	NULL	Hell Creek	8	53.4371	-70.6236	53.5967	-72.7531	52.7407	-75.6659	46.1513	-103.812	66.4	0.4	65	temperate lowland forest	2	2. temperate lowland forest	Sunset Butte
	Magnoliopsida	6	Magnoliales?	35	uncertain	101	Quereuxia angulata	198	460	Angiosperm	1	Maas	2	Johnson, 2002	8	NULL	Hell Creek	8	53.2995	-70.6439	53.459	-72.7705	52.6027	-75.679	46.0173	-103.763	66.4	0.4	65	estuarine, aquatic	7	7. estuarine, aquatic	Mud Buttes
	Magnoliopsida	6	Proteales	47	Platanaceae	72	Platanus raynoldsii	184	420	Angiosperm	1	Maas	2	Johnson, 2002	8	NULL	Hell Creek	8	53.2995	-70.6439	53.459	-72.7705	52.6027	-75.679	46.0173	-103.763	66.4	0.4	65	temperate lowland forest	2	2. temperate lowland forest	Mud Buttes
	Pinopsida	9	Pinales	42	Cheirolepidiaceae	21	Cupressinocladus interruptus	64	119	Gymnosperm	3	Maas	2	Johnson, 2002	8	NULL	Hell Creek	8	53.2995	-70.6439	53.459	-72.7705	52.6027	-75.679	46.0173	-103.763	66.4	0.4	65	temperate lowland forest	2	2. temperate lowland forest	Mud Buttes
	Magnoliopsida	6	Magnoliales?	35	uncertain	101	Dicotylophyllum anomalum	75	150	Angiosperm	1	Maas	2	Johnson, 2002	8	NULL	Hell Creek	8	53.2995	-70.6439	53.459	-72.7705	52.6027	-75.679	46.0173	-103.763	66.4	0.4	65	temperate lowland forest	2	2. temperate lowland forest	Mud Buttes
	Liliopsida	4	Arecales	3	Arecaceae	9	Amesoneuron or Sabalites sp.	4	3	Angiosperm	1	Maas	2	Johnson, 2002	8	NULL	Hell Creek	8	53.2995	-70.6439	53.459	-72.7705	52.6027	-75.679	46.0173	-103.763	66.4	0.4	65	unknown	0	0. unknown	Mud Buttes
	Liliopsida	4	Alismatales	1	Araceae	7	Limnobiophyllum scutatum	121	282	Angiosperm	1	Maas	2	Johnson, 2002	8	NULL	Hell Creek	8	53.2995	-70.6439	53.459	-72.7705	52.6027	-75.679	46.0173	-103.763	66.4	0.4	65	estuarine, aquatic	7	7. estuarine, aquatic	Mud Buttes
	Magnoliopsida	6	Malvales	37	Malvaceae	57	Penosphyllum cordatum	167	362	Angiosperm	1	Maas	2	Johnson, 2002	8	NULL	Hell Creek	8	53.2995	-70.6439	53.459	-72.7705	52.6027	-75.679	46.0173	-103.763	66.4	0.4	65	tropical lowland forest	6	6. tropical lowland forest	Mud Buttes
	Magnoliopsida	6	Proteales	47	Nelumbonaceae	63	Nelumbium montanum	152	336	Angiosperm	1	Maas	2	Johnson, 2002	8	NULL	Hell Creek	8	53.2995	-70.6439	53.459	-72.7705	52.6027	-75.679	46.0173	-103.763	66.4	0.4	65	estuarine, aquatic	7	7. estuarine, aquatic	Mud Buttes
	Magnoliopsida	6	Proteales	47	Platanaceae	72	Platanites marginata	182	413	Angiosperm	1	Maas	2	Johnson, 2002	8	NULL	Hell Creek	8	53.2995	-70.6439	53.459	-72.7705	52.6027	-75.679	46.0173	-103.763	66.4	0.4	65	temperate lowland forest	2	2. temperate lowland forest	Mud Buttes
	Magnoliopsida	6	Proteales	47	Platanaceae	72	Grewiopsis saportana	103	234	Angiosperm	1	Maas	2	Johnson, 2002	8	NULL	Hell Creek	8	53.2995	-70.6439	53.459	-72.7705	52.6027	-75.679	46.0173	-103.763	66.4	0.4	65	temperate lowland forest	2	2. temperate lowland forest	Mud Buttes
	Magnoliopsida	6	Rosales	51	Moraceae	61	Ficus planicostata	92	190	Angiosperm	1	Maas	2	Johnson, 2002	8	NULL	Hell Creek	8	53.2995	-70.6439	53.459	-72.7705	52.6027	-75.679	46.0173	-103.763	66.4	0.4	65	tropical lowland forest	6	6. tropical lowland forest	Mud Buttes
	Magnoliopsida	6	Ranunculales	48	Papaveraceae	68	Palaeoaster inquirenda	160	355	Angiosperm	1	Maas	2	Johnson, 2002	8	NULL	Hell Creek	8	53.2995	-70.6439	53.459	-72.7705	52.6027	-75.679	46.0173	-103.763	66.4	0.4	65	temperate lowland forest	2	2. temperate lowland forest	Mud Buttes
	Magnoliopsida	6	Vitales	61	Vitaceae	96	Vitis stantonii	244	567	Angiosperm	1	Maas	2	Johnson, 2002	8	NULL	Hell Creek	8	53.2995	-70.6439	53.459	-72.7705	52.6027	-75.679	46.0173	-103.763	66.4	0.4	65	temperate lowland forest	2	2. temperate lowland forest	Mud Buttes
	Magnoliopsida	6	Laurales?	32	uncertain	101	Laurales?, unknown 1 (HC32)	113	260	Angiosperm	1	Maas	2	Johnson, 2002	8	NULL	Hell Creek	8	53.2995	-70.6439	53.459	-72.7705	52.6027	-75.679	46.0173	-103.763	66.4	0.4	65	tropical lowland forest	6	6. tropical lowland forest	Mud Buttes
	Magnoliopsida	6	Rosales	51	Ulmaceae	93	Ulmaceae, unknown 1 (HC36)	240	549	Angiosperm	1	Maas	2	Johnson, 2002	8	NULL	Hell Creek	8	53.2995	-70.6439	53.459	-72.7705	52.6027	-75.679	46.0173	-103.763	66.4	0.4	65	temperate lowland forest	2	2. temperate lowland forest	Mud Buttes
	Magnoliopsida	6	Magnoliales	34	Magnoliaceae	55	Magnoliaceae, unknown 2 (HC43)	128	297	Angiosperm	1	Maas	2	Johnson, 2002	8	NULL	Hell Creek	8	53.2995	-70.6439	53.459	-72.7705	52.6027	-75.679	46.0173	-103.763	66.4	0.4	65	tropical lowland forest	6	6. tropical lowland forest	Mud Buttes
	Magnoliopsida	6	Magnoliales	34	Magnoliaceae	55	Magnoliaceae, unknown 2 (HC43)	128	297	Angiosperm	1	Maas	2	Johnson, 2002	8	NULL	Hell Creek	8	53.2995	-70.6439	53.459	-72.7705	52.6027	-75.679	46.0173	-103.763	66.4	0.4	65	tropical lowland forest	6	6. tropical lowland forest	Mud Buttes
	Magnoliopsida	6	Fagales	22	Fagaceae	39	Dryophyllum tenneseensis	81	164	Angiosperm	1	Maas	2	Johnson, 2002	8	NULL	Hell Creek	8	53.2995	-70.6439	53.459	-72.7705	52.6027	-75.679	46.0173	-103.763	66.4	0.4	65	temperate lowland forest	2	2. temperate lowland forest	Mud Buttes
	Magnoliopsida	6	Rosales?	52	uncertain	101	Rosidae, unknown 2 (HC47)	210	480	Angiosperm	1	Maas	2	Johnson, 2002	8	NULL	Hell Creek	8	53.2995	-70.6439	53.459	-72.7705	52.6027	-75.679	46.0173	-103.763	66.4	0.4	65	unknown	0	0. unknown	Mud Buttes
	Magnoliopsida	6	Fagales	22	Fagaceae	39	Dryophyllum subfalcatum	81	163	Angiosperm	1	Maas	2	Johnson, 2002	8	NULL	Hell Creek	8	53.2995	-70.6439	53.459	-72.7705	52.6027	-75.679	46.0173	-103.763	66.4	0.4	65	temperate lowland forest	2	2. temperate lowland forest	Mud Buttes
	Magnoliopsida	6	Rosales	51	Rhamnaceae	81	Rhamnus cleburni	205	466	Angiosperm	1	Maas	2	Johnson, 2002	8	NULL	Hell Creek	8	53.2995	-70.6439	53.459	-72.7705	52.6027	-75.679	46.0173	-103.763	66.4	0.4	65	temperate lowland forest	2	2. temperate lowland forest	Mud Buttes
	Magnoliopsida	6	Laurales	31	Lauraceae	51	Cissites acerifolia	51	88	Angiosperm	1	Maas	2	Johnson, 2002	8	NULL	Hell Creek	8	53.2995	-70.6439	53.459	-72.7705	52.6027	-75.679	46.0173	-103.763	66.4	0.4	65	upland forest	1	1. upland forest	Mud Buttes
	Magnoliopsida	6	Magnoliales	34	Magnoliaceae	55	Magnoliaceae, unknown 3 (HC66)	128	298	Angiosperm	1	Maas	2	Johnson, 2002	8	NULL	Hell Creek	8	53.2995	-70.6439	53.459	-72.7705	52.6027	-75.679	46.0173	-103.763	66.4	0.4	65	tropical lowland forest	6	6. tropical lowland forest	Mud Buttes
	Pinopsida	9	Pinales	42	Cupressaceae	24	Sequoia sp.	225	527	Gymnosperm	3	Maas	2	Johnson, 2002	8	NULL	Hell Creek	8	53.2995	-70.6439	53.459	-72.7705	52.6027	-75.679	46.0173	-103.763	66.4	0.4	65	temperate lowland forest	2	2. temperate lowland forest	Mud Buttes
	Magnoliopsida	6	Celastrales	8	Celastraceae	18	Celastrus taurenensis	43	69	Angiosperm	1	Maas	2	Johnson, 2002	8	NULL	Hell Creek	8	53.2995	-70.6439	53.459	-72.7705	52.6027	-75.679	46.0173	-103.763	66.4	0.4	65	tropical lowland forest	6	6. tropical lowland forest	Mud Buttes
	Magnoliopsida	6	Trochodendrales/Cercidiphyllales	59	uncertain	101	Trochodendroides nebrascensis	238	546	Angiosperm	1	Maas	2	Johnson, 2002	8	NULL	Hell Creek	8	53.2995	-70.6439	53.459	-72.7705	52.6027	-75.679	46.0173	-103.763	66.4	0.4	65	tropical lowland forest	6	6. tropical lowland forest	Mud Buttes
	Magnoliopsida	6	Laurales	31	Lauraceae	51	Marmarthia trivialis	138	314	Angiosperm	1	Maas	2	Johnson, 2002	8	NULL	Hell Creek	8	53.2995	-70.6439	53.459	-72.7705	52.6027	-75.679	46.0173	-103.763	66.4	0.4	65	tropical lowland forest	6	6. tropical lowland forest	Mud Buttes
	Magnoliopsida	6	Proteales	47	Platanaceae	72	Platanites marginata	182	413	Angiosperm	1	Maas	2	Johnson, 2002	8	NULL	Hell Creek	8	53.2995	-70.6439	53.459	-72.7705	52.6027	-75.679	46.0173	-103.763	66.4	0.4	65	temperate lowland forest	2	2. temperate lowland forest	Mud Buttes
	Magnoliopsida	6	Nymphaeales	40	Nymphaeaceae	64	Paranymphaea hastata	165	360	Angiosperm	1	Maas	2	Johnson, 2002	8	NULL	Hell Creek	8	53.2995	-70.6439	53.459	-72.7705	52.6027	-75.679	46.0173	-103.763	66.4	0.4	65	estuarine, aquatic	7	7. estuarine, aquatic	Mud Buttes
	Pinopsida	9	Pinales	42	Cupressaceae	24	Fokieniopsis catenulata	97	218	Gymnosperm	3	Maas	2	Johnson, 2002	8	NULL	Hell Creek	8	53.2995	-70.6439	53.459	-72.7705	52.6027	-75.679	46.0173	-103.763	66.4	0.4	65	temperate lowland forest	2	2. temperate lowland forest	Mud Buttes
	Magnoliopsida	6	Laurales	31	Lauraceae	51	Marmarthia pearsonii	138	313	Angiosperm	1	Maas	2	Johnson, 2002	8	NULL	Hell Creek	8	53.2995	-70.6439	53.459	-72.7705	52.6027	-75.679	46.0173	-103.763	66.4	0.4	65	tropical lowland forest	6	6. tropical lowland forest	Mud Buttes
	Magnoliopsida	6	Laurales	31	uncertain	101	Laurales, unknown 6 (HC163)	112	256	Angiosperm	1	Maas	2	Johnson, 2002	8	NULL	Hell Creek	8	53.2995	-70.6439	53.459	-72.7705	52.6027	-75.679	46.0173	-103.763	66.4	0.4	65	tropical lowland forest	6	6. tropical lowland forest	Mud Buttes
	Pinopsida	9	Pinales	42	uncertain	101	Elatides longifolia	84	167	Gymnosperm	3	Maas	2	Johnson, 2002	8	NULL	Hell Creek	8	53.2995	-70.6439	53.459	-72.7705	52.6027	-75.679	46.0173	-103.763	66.4	0.4	65	temperate lowland forest	2	2. temperate lowland forest	Mud Buttes
	Magnoliopsida	6	Magnoliales	34	Magnoliaceae?	56	Liriodendrites bradacii	122	283	Angiosperm	1	Maas	2	Johnson, 2002	8	NULL	Hell Creek	8	53.2995	-70.6439	53.459	-72.7705	52.6027	-75.679	46.0173	-103.763	66.4	0.4	65	coastal plain	4	4. coastal plain	Mud Buttes
	Magnoliopsida	6	Rosales	51	Rhamnaceae	81	Ziziphus fibrillosus	255	581	Angiosperm	1	Maas	2	Johnson, 2002	8	NULL	Hell Creek	8	53.2995	-70.6439	53.459	-72.7705	52.6027	-75.679	46.0173	-103.763	66.4	0.4	65	tropical lowland forest	6	6. tropical lowland forest	Mud Buttes
	Magnoliopsida	6	Laurales	31	Lauraceae	51	Cissites lobata	51	90	Angiosperm	1	Maas	2	Johnson, 2002	8	NULL	Hell Creek	8	53.2995	-70.6439	53.459	-72.7705	52.6027	-75.679	46.0173	-103.763	66.4	0.4	65	upland forest	1	1. upland forest	Mud Buttes
	Magnoliopsida	6	Rosales	51	Moraceae	61	Artocarpus lessigiana	19	25	Angiosperm	1	Maas	2	Johnson, 2002	8	NULL	Hell Creek	8	53.2995	-70.6439	53.459	-72.7705	52.6027	-75.679	46.0173	-103.763	66.4	0.4	65	tropical lowland forest	6	6. tropical lowland forest	Mud Buttes
	Magnoliopsida	6	Laurales	31	Lauraceae	51	Cissites puilosokensis	51	92	Angiosperm	1	Maas	2	Johnson, 2002	8	NULL	Hell Creek	8	53.2995	-70.6439	53.459	-72.7705	52.6027	-75.679	46.0173	-103.763	66.4	0.4	65	upland forest	1	1. upland forest	Mud Buttes
	Magnoliopsida	6	Piperales	44	Saururaceae	87	Saururaceae, unknown (HC182)	220	511	Angiosperm	1	Maas	2	Johnson, 2002	8	NULL	Hell Creek	8	53.2995	-70.6439	53.459	-72.7705	52.6027	-75.679	46.0173	-103.763	66.4	0.4	65	tropical lowland forest	6	6. tropical lowland forest	Mud Buttes
	Magnoliopsida	6	Piperales	44	Saururaceae	87	Saururaceae, unknown (HC183)	220	512	Angiosperm	1	Maas	2	Johnson, 2002	8	NULL	Hell Creek	8	53.2995	-70.6439	53.459	-72.7705	52.6027	-75.679	46.0173	-103.763	66.4	0.4	65	tropical lowland forest	6	6. tropical lowland forest	Mud Buttes
	Magnoliopsida	6	Laurales	31	Lauraceae	51	Cissites insignis	51	89	Angiosperm	1	Maas	2	Johnson, 2002	8	NULL	Hell Creek	8	53.2995	-70.6439	53.459	-72.7705	52.6027	-75.679	46.0173	-103.763	66.4	0.4	65	upland forest	1	1. upland forest	Mud Buttes
	Magnoliopsida	6	Vitales	61	Vitaceae	96	Vitis stantonii	244	567	Angiosperm	1	Maas	2	Johnson, 2002	8	NULL	Hell Creek	8	53.2995	-70.6439	53.459	-72.7705	52.6027	-75.679	46.0173	-103.763	66.4	0.4	65	temperate lowland forest	2	2. temperate lowland forest	Mud Buttes
	Magnoliopsida	6	Laurales	31	uncertain	101	Laurales, unknown 8 (HC199)	112	258	Angiosperm	1	Maas	2	Johnson, 2002	8	NULL	Hell Creek	8	53.2995	-70.6439	53.459	-72.7705	52.6027	-75.679	46.0173	-103.763	66.4	0.4	65	tropical lowland forest	6	6. tropical lowland forest	Mud Buttes
	Magnoliopsida	6	Laurales?	32	Lauraceae?	52	Bisonia niemii	30	43	Angiosperm	1	Maas	2	Johnson, 2002	8	NULL	Hell Creek	8	53.2995	-70.6439	53.459	-72.7705	52.6027	-75.679	46.0173	-103.763	66.4	0.4	65	unknown	0	0. unknown	Mud Buttes
	Liliopsida	4	Alismatales	1	Araceae	7	Philodendron	169	364	Angiosperm	1	Maas	2	Johnson, 2002	8	NULL	Hell Creek	8	53.2995	-70.6439	53.459	-72.7705	52.6027	-75.679	46.0173	-103.763	66.4	0.4	65	tropical lowland forest	6	6. tropical lowland forest	Mud Buttes
	Magnoliopsida	6	Proteales	47	Nelumbonaceae	63	Nelumbo	153	337	Angiosperm	1	Maas	2	Johnson, 2002	8	NULL	Hell Creek	8	53.2995	-70.6439	53.459	-72.7705	52.6027	-75.679	46.0173	-103.763	66.4	0.4	65	estuarine, aquatic	7	7. estuarine, aquatic	Mud Buttes
	Magnoliopsida	6	Magnoliales	34	Magnoliaceae?	56	Liriodendron sp.	123	285	Angiosperm	1	Maas	2	Johnson, 2002	8	NULL	Hell Creek	8	53.2995	-70.6439	53.459	-72.7705	52.6027	-75.679	46.0173	-103.763	66.4	0.4	65	coastal plain	4	4. coastal plain	Mud Buttes
	Polypodiopsida	10	Filicales	23	uncertain	101	Filicopsida sp. 6	95	215	Fern/Moss	2	Maas	2	Johnson, 2002	8	NULL	Hell Creek	8	53.2995	-70.6439	53.459	-72.7705	52.6027	-75.679	46.0173	-103.763	66.4	0.4	65	unknown	0	0. unknown	Mud Buttes
	Magnoliopsida	6	Rosales	51	Rhamnaceae	81	Rhamnaceae, unknown (HC261)	202	464	Angiosperm	1	Maas	2	Johnson, 2002	8	NULL	Hell Creek	8	53.2995	-70.6439	53.459	-72.7705	52.6027	-75.679	46.0173	-103.763	66.4	0.4	65	tropical lowland forest	6	6. tropical lowland forest	Mud Buttes
	Magnoliopsida	6	Laurales	31	uncertain	101	Laurales, unknown 8 (HC199)	112	258	Angiosperm	1	Maas	2	Johnson, 2002	8	NULL	Hell Creek	8	53.2995	-70.6439	53.459	-72.7705	52.6027	-75.679	46.0173	-103.763	66.4	0.4	65	tropical lowland forest	6	6. tropical lowland forest	Mud Buttes
	Polypodiopsida	10	Filicales	23	uncertain	101	Filicales sp.	93	205	Fern/Moss	2	Maas	2	Johnson, 2002	8	NULL	Hell Creek	8	53.2995	-70.6439	53.459	-72.7705	52.6027	-75.679	46.0173	-103.763	66.4	0.4	65	unknown	0	0. unknown	Mud Buttes
	Magnoliopsida	6	Laurales	31	uncertain	101	Laurales, unknown (HC292)	112	250	Angiosperm	1	Maas	2	Johnson, 2002	8	NULL	Hell Creek	8	53.2995	-70.6439	53.459	-72.7705	52.6027	-75.679	46.0173	-103.763	66.4	0.4	65	tropical lowland forest	6	6. tropical lowland forest	Mud Buttes
	Magnoliopsida	6	Fagales	22	Myricaceae	62	Myrica torreyi	148	331	Angiosperm	1	Maas	2	Johnson, 2002	8	NULL	Hell Creek	8	53.2995	-70.6439	53.459	-72.7705	52.6027	-75.679	46.0173	-103.763	66.4	0.4	65	wet, successional	5	5. wet, successional	Mud Buttes
	Magnoliopsida	6	Dilleniales	16	Dilleniaceae	31	Dilleniidae, unknown (HC354)	77	152	Angiosperm	1	Maas	2	Johnson, 2002	8	NULL	Hell Creek	8	53.2995	-70.6439	53.459	-72.7705	52.6027	-75.679	46.0173	-103.763	66.4	0.4	65	unknown	0	0. unknown	Mud Buttes
	Magnoliopsida	6	Saxifragales	55	Cercidiphyllaceae	20	Cercidiphyllaceae, unknown (HC355)	45	72	Angiosperm	1	Maas	2	Johnson, 2002	8	NULL	Hell Creek	8	53.2995	-70.6439	53.459	-72.7705	52.6027	-75.679	46.0173	-103.763	66.4	0.4	65	temperate lowland forest	2	2. temperate lowland forest	Mud Buttes
	Liliopsida	4	Arecales	3	Arecaceae	9	Amesoneuron or Sabalites sp.	4	3	Angiosperm	1	Maas	2	Johnson, 2002	8	NULL	Hell Creek	8	53.2836	-70.8797	53.4412	-73.0068	52.5826	-75.9101	45.9562	-103.948	66.4	0.4	65	unknown	0	0. unknown	Doaks Butte
	Magnoliopsida	6	uncertain	63	uncertain	101	Ziziphoides flabella	254	580	Angiosperm	1	Maas	2	Johnson, 2002	8	NULL	Hell Creek	8	53.2836	-70.8797	53.4412	-73.0068	52.5826	-75.9101	45.9562	-103.948	66.4	0.4	65	tropical lowland forest	6	6. tropical lowland forest	Doaks Butte
	Magnoliopsida	6	Proteales	47	Platanaceae	72	Platanites marginata	182	413	Angiosperm	1	Maas	2	Johnson, 2002	8	NULL	Hell Creek	8	53.2836	-70.8797	53.4412	-73.0068	52.5826	-75.9101	45.9562	-103.948	66.4	0.4	65	temperate lowland forest	2	2. temperate lowland forest	Doaks Butte
	Magnoliopsida	6	Proteales	47	Platanaceae	72	Grewiopsis saportana	103	234	Angiosperm	1	Maas	2	Johnson, 2002	8	NULL	Hell Creek	8	53.2836	-70.8797	53.4412	-73.0068	52.5826	-75.9101	45.9562	-103.948	66.4	0.4	65	temperate lowland forest	2	2. temperate lowland forest	Doaks Butte
	Magnoliopsida	6	Rosales	51	Moraceae	61	Ficus planicostata	92	190	Angiosperm	1	Maas	2	Johnson, 2002	8	NULL	Hell Creek	8	53.2836	-70.8797	53.4412	-73.0068	52.5826	-75.9101	45.9562	-103.948	66.4	0.4	65	tropical lowland forest	6	6. tropical lowland forest	Doaks Butte
	Magnoliopsida	6	Laurales?	32	uncertain	101	Laurales?, unknown 1 (HC32)	113	260	Angiosperm	1	Maas	2	Johnson, 2002	8	NULL	Hell Creek	8	53.2836	-70.8797	53.4412	-73.0068	52.5826	-75.9101	45.9562	-103.948	66.4	0.4	65	tropical lowland forest	6	6. tropical lowland forest	Doaks Butte
	Magnoliopsida	6	Fagales	22	Fagaceae	39	Dryophyllum tenneseensis	81	164	Angiosperm	1	Maas	2	Johnson, 2002	8	NULL	Hell Creek	8	53.2836	-70.8797	53.4412	-73.0068	52.5826	-75.9101	45.9562	-103.948	66.4	0.4	65	temperate lowland forest	2	2. temperate lowland forest	Doaks Butte
	Magnoliopsida	6	Fagales	22	Fagaceae	39	Dryophyllum subfalcatum	81	163	Angiosperm	1	Maas	2	Johnson, 2002	8	NULL	Hell Creek	8	53.2836	-70.8797	53.4412	-73.0068	52.5826	-75.9101	45.9562	-103.948	66.4	0.4	65	temperate lowland forest	2	2. temperate lowland forest	Doaks Butte
	uncertain	11	uncertain	63	uncertain	101	Erlingdorfia montana	90	172	Angiosperm	1	Maas	2	Johnson, 2002	8	NULL	Hell Creek	8	53.2836	-70.8797	53.4412	-73.0068	52.5826	-75.9101	45.9562	-103.948	66.4	0.4	65	coastal plain	4	4. coastal plain	Doaks Butte
	Magnoliopsida	6	Laurales	31	Lauraceae	51	Laurophyllum wardiana	115	271	Angiosperm	1	Maas	2	Johnson, 2002	8	NULL	Hell Creek	8	53.2836	-70.8797	53.4412	-73.0068	52.5826	-75.9101	45.9562	-103.948	66.4	0.4	65	tropical lowland forest	6	6. tropical lowland forest	Doaks Butte
	uncertain	11	uncertain	63	uncertain	101	Erlingdorfia montana	89	172	Angiosperm	1	Maas	2	Johnson, 2002	8	NULL	Hell Creek	8	53.2836	-70.8797	53.4412	-73.0068	52.5826	-75.9101	45.9562	-103.948	66.4	0.4	65	coastal plain	4	4. coastal plain	Doaks Butte
	Pinopsida	9	Pinales	42	Cupressaceae	24	Taxodium olrikii	231	536	Gymnosperm	3	Maas	2	Johnson, 2002	8	NULL	Hell Creek	8	53.2836	-70.8797	53.4412	-73.0068	52.5826	-75.9101	45.9562	-103.948	66.4	0.4	65	wet, successional	5	5. wet, successional	Doaks Butte
	Magnoliopsida	6	Saxifragales	55	Hamamelidaceae?	47	Leepierceia preartocarpoides	117	277	Angiosperm	1	Maas	2	Johnson, 2002	8	NULL	Hell Creek	8	53.2836	-70.8797	53.4412	-73.0068	52.5826	-75.9101	45.9562	-103.948	66.4	0.4	65	coastal plain	4	4. coastal plain	Doaks Butte
	Magnoliopsida	6	Laurales	31	uncertain	101	Laurales, unknown 3 (HC87)	112	253	Angiosperm	1	Maas	2	Johnson, 2002	8	NULL	Hell Creek	8	53.2836	-70.8797	53.4412	-73.0068	52.5826	-75.9101	45.9562	-103.948	66.4	0.4	65	tropical lowland forest	6	6. tropical lowland forest	Doaks Butte
	Magnoliopsida	6	Laurales	31	Lauraceae	51	Cinnamomum lineafolia	50	84	Angiosperm	1	Maas	2	Johnson, 2002	8	NULL	Hell Creek	8	53.2836	-70.8797	53.4412	-73.0068	52.5826	-75.9101	45.9562	-103.948	66.4	0.4	65	tropical lowland forest	6	6. tropical lowland forest	Doaks Butte
	Magnoliopsida	6	Laurales	31	Lauraceae	51	Cinnamomum lineafolia	50	84	Angiosperm	1	Maas	2	Johnson, 2002	8	NULL	Hell Creek	8	53.2836	-70.8797	53.4412	-73.0068	52.5826	-75.9101	45.9562	-103.948	66.4	0.4	65	tropical lowland forest	6	6. tropical lowland forest	Doaks Butte
	Magnoliopsida	6	Fagales	22	Fagaceae	39	Fagaceae, unknown 1 (HC100)	91	173	Angiosperm	1	Maas	2	Johnson, 2002	8	NULL	Hell Creek	8	53.2836	-70.8797	53.4412	-73.0068	52.5826	-75.9101	45.9562	-103.948	66.4	0.4	65	temperate lowland forest	2	2. temperate lowland forest	Doaks Butte
	Magnoliopsida	6	Trochodendrales/Cercidiphyllales	59	uncertain	101	Trochodendroides nebrascensis	238	546	Angiosperm	1	Maas	2	Johnson, 2002	8	NULL	Hell Creek	8	53.2836	-70.8797	53.4412	-73.0068	52.5826	-75.9101	45.9562	-103.948	66.4	0.4	65	tropical lowland forest	6	6. tropical lowland forest	Doaks Butte
	Magnoliopsida	6	Laurales	31	Lauraceae	51	Marmarthia trivialis	138	314	Angiosperm	1	Maas	2	Johnson, 2002	8	NULL	Hell Creek	8	53.2836	-70.8797	53.4412	-73.0068	52.5826	-75.9101	45.9562	-103.948	66.4	0.4	65	tropical lowland forest	6	6. tropical lowland forest	Doaks Butte
	Magnoliopsida	6	Proteales	47	Platanaceae	72	Platanites marginata	182	413	Angiosperm	1	Maas	2	Johnson, 2002	8	NULL	Hell Creek	8	53.2836	-70.8797	53.4412	-73.0068	52.5826	-75.9101	45.9562	-103.948	66.4	0.4	65	temperate lowland forest	2	2. temperate lowland forest	Doaks Butte
	Pinopsida	9	Pinales	42	Cupressaceae	24	Fokieniopsis catenulata	97	218	Gymnosperm	3	Maas	2	Johnson, 2002	8	NULL	Hell Creek	8	53.2836	-70.8797	53.4412	-73.0068	52.5826	-75.9101	45.9562	-103.948	66.4	0.4	65	temperate lowland forest	2	2. temperate lowland forest	Doaks Butte
	Magnoliopsida	6	Laurales?	32	Lauraceae?	52	Bisonia niemii	30	43	Angiosperm	1	Maas	2	Johnson, 2002	8	NULL	Hell Creek	8	53.2836	-70.8797	53.4412	-73.0068	52.5826	-75.9101	45.9562	-103.948	66.4	0.4	65	unknown	0	0. unknown	Doaks Butte
	Magnoliopsida	6	Proteales	47	Platanaceae	72	Platanaceae, unknown (HC209)	181	397	Angiosperm	1	Maas	2	Johnson, 2002	8	NULL	Hell Creek	8	53.2836	-70.8797	53.4412	-73.0068	52.5826	-75.9101	45.9562	-103.948	66.4	0.4	65	temperate lowland forest	2	2. temperate lowland forest	Doaks Butte
	Magnoliopsida	6	Magnoliales	34	Magnoliaceae?	56	Liriodendron sp. (HC212)	123	286	Angiosperm	1	Maas	2	Johnson, 2002	8	NULL	Hell Creek	8	53.2836	-70.8797	53.4412	-73.0068	52.5826	-75.9101	45.9562	-103.948	66.4	0.4	65	coastal plain	4	4. coastal plain	Doaks Butte
	Polypodiopsida	10	Schizaeales	56	Schizaeaceae	88	Anemia sp.	8	11	Fern/Moss	2	Maas	2	Knowlton, 1916b	11	NULL	Fox Hills	5	48.1177	-74.609	48.247	-76.6476	47.3529	-79.3562	40.3162	-104.852	69.05	1.35	65	tropical lowland forest	6	6. tropical lowland forest	NULL
	Pinopsida	9	Pinales	42	Cupressaceae	24	Sequoia reichenbachi	225	526	Gymnosperm	3	Maas	2	Knowlton, 1916b	11	NULL	Fox Hills	5	48.1177	-74.609	48.247	-76.6476	47.3529	-79.3562	40.3162	-104.852	69.05	1.35	65	temperate lowland forest	2	2. temperate lowland forest	NULL
	Pinopsida	9	Pinales	42	Cupressaceae	24	Sequoia magnifolia	225	523	Gymnosperm	3	Maas	2	Knowlton, 1916b	11	NULL	Fox Hills	5	48.1177	-74.609	48.247	-76.6476	47.3529	-79.3562	40.3162	-104.852	69.05	1.35	65	temperate lowland forest	2	2. temperate lowland forest	NULL
	Pinopsida	9	Pinales	42	Cephalotaxaceae	19	Cephalotaxus coloradensis	44	71	Gymnosperm	3	Maas	2	Knowlton, 1916b	11	NULL	Fox Hills	5	48.1177	-74.609	48.247	-76.6476	47.3529	-79.3562	40.3162	-104.852	69.05	1.35	65	temperate lowland forest	2	2. temperate lowland forest	NULL
	Pinopsida	9	Pinales	42	Podocarpaceae	74	Podocarpus stantonii	186	423	Gymnosperm	3	Maas	2	Knowlton, 1916b	11	NULL	Fox Hills	5	48.1177	-74.609	48.247	-76.6476	47.3529	-79.3562	40.3162	-104.852	69.05	1.35	65	temperate lowland forest	2	2. temperate lowland forest	NULL
	Magnoliopsida	6	Fagales	22	Myricaceae	62	Myrica torreyi	148	331	Angiosperm	1	Maas	2	Knowlton, 1916b	11	NULL	Fox Hills	5	48.1177	-74.609	48.247	-76.6476	47.3529	-79.3562	40.3162	-104.852	69.05	1.35	65	wet, successional	5	5. wet, successional	NULL
	Magnoliopsida	6	Rosales	51	Moraceae	61	Ficus speciossima	92	199	Angiosperm	1	Maas	2	Knowlton, 1916b	11	NULL	Fox Hills	5	48.1177	-74.609	48.247	-76.6476	47.3529	-79.3562	40.3162	-104.852	69.05	1.35	65	tropical lowland forest	6	6. tropical lowland forest	NULL
	Magnoliopsida	6	Rosales	51	Rhamnaceae	81	Rhamnus williardi	205	471	Angiosperm	1	Maas	2	Knowlton, 1916b	11	NULL	Fox Hills	5	48.1177	-74.609	48.247	-76.6476	47.3529	-79.3562	40.3162	-104.852	69.05	1.35	65	temperate lowland forest	2	2. temperate lowland forest	NULL
	Magnoliopsida	6	Piperales	44	Aristolochiaceae	10	Aristolochia coloradensis	17	23	Angiosperm	1	Maas	2	Knowlton, 1916b	11	NULL	Fox Hills	5	48.1177	-74.609	48.247	-76.6476	47.3529	-79.3562	40.3162	-104.852	69.05	1.35	65	tropical lowland forest	6	6. tropical lowland forest	NULL
	Magnoliopsida	6	Dipsacales	17	Adoxaceae	2	Viburnum vulpinum	243	564	Angiosperm	1	Maas	2	Knowlton, 1916b	11	NULL	Fox Hills	5	48.1177	-74.609	48.247	-76.6476	47.3529	-79.3562	40.3162	-104.852	69.05	1.35	65	temperate lowland forest	2	2. temperate lowland forest	NULL
	Magnoliopsida	6	Lamiales	30	Oleaceae	65	Phyllites cockerelli	172	371	Angiosperm	1	Maas	2	Knowlton, 1916b	11	NULL	Fox Hills	5	48.1177	-74.609	48.247	-76.6476	47.3529	-79.3562	40.3162	-104.852	69.05	1.35	65	unknown	0	0. unknown	NULL
	Cycadopsida	2	Cycadales	14	Zamiaceae	99	Zamia sp.	251	576	Gymnosperm	3	Maas	2	McIver, 1999	12	NULL	Frenchman?	6	57.1849	-71.0866	57.3406	-73.3067	56.4782	-76.326	49.5887	-106.074	66.2	0.2	65	tropical lowland forest	6	6. tropical lowland forest	NULL
	Ginkgoopsida	3	Ginkgoales	26	Ginkgoaceae	42	Ginkgo sp.	100	225	Gymnosperm	3	Maas	2	McIver, 1999	12	NULL	Frenchman?	6	57.1849	-71.0866	57.3406	-73.3067	56.4782	-76.326	49.5887	-106.074	66.2	0.2	65	temperate lowland forest	2	2. temperate lowland forest	NULL
	Pinopsida	9	Pinales	42	Cupressaceae	24	Glyptostrobus sp.	102	231	Gymnosperm	3	Maas	2	McIver, 1999	12	NULL	Frenchman?	6	57.1849	-71.0866	57.3406	-73.3067	56.4782	-76.326	49.5887	-106.074	66.2	0.2	65	swampy, lagoonal	3	3. swampy, lagoonal	NULL
	Pinopsida	9	Pinales	42	Cupressaceae	24	Metasequoia sp.	144	325	Gymnosperm	3	Maas	2	McIver, 1999	12	NULL	Frenchman?	6	57.1849	-71.0866	57.3406	-73.3067	56.4782	-76.326	49.5887	-106.074	66.2	0.2	65	temperate lowland forest	2	2. temperate lowland forest	NULL
	Polypodiopsida	10	Equisetales	19	Equisetaceae	34	Equisetum sp.	87	170	Fern/Moss	2	Maas	2	McIver, 1999	12	NULL	Frenchman?	6	57.1849	-71.0866	57.3406	-73.3067	56.4782	-76.326	49.5887	-106.074	66.2	0.2	65	wet, successional	5	5. wet, successional	NULL
	Polypodiopsida	10	Filicales	23	uncertain	101	Filicopsida, unknown	95	216	Fern/Moss	2	Maas	2	McIver, 1999	12	NULL	Frenchman?	6	57.1849	-71.0866	57.3406	-73.3067	56.4782	-76.326	49.5887	-106.074	66.2	0.2	65	unknown	0	0. unknown	NULL
	Liliopsida	4	Poales	45	Typhaceae	92	Typha sp.	239	548	Angiosperm	1	Maas	2	McIver, 1999	12	NULL	Frenchman?	6	57.1849	-71.0866	57.3406	-73.3067	56.4782	-76.326	49.5887	-106.074	66.2	0.2	65	estuarine, aquatic	7	7. estuarine, aquatic	NULL
	Polypodiopsida	10	Osmundales	41	Osmundaceae	67	Osmunda hollicki	158	350	Fern/Moss	2	Maas	2	Peppe et al., 2007	14	0.483729	Fox Hills	5	52.9325	-66.8217	53.1207	-68.9254	52.3066	-71.8978	46.435	-100.46	69.05	1.35	70	temperate lowland forest	2	2. temperate lowland forest	NULL
	Cycadopsida	2	Bennettitales	5	Cycadeoideaceae	26	Nilssoniocladus yukonensis	155	344	Gymnosperm	3	Maas	2	Peppe et al., 2007	14	17.0624	Fox Hills	5	52.9325	-66.8217	53.1207	-68.9254	52.3066	-71.8978	46.435	-100.46	69.05	1.35	70	tropical lowland forest	6	6. tropical lowland forest	NULL
	Cycadopsida	2	Bennettitales	5	Cycadeoideaceae	26	Nilssoniocladus comtula	155	343	Gymnosperm	3	Maas	2	Peppe et al., 2007	14	8.48725	Fox Hills	5	52.9325	-66.8217	53.1207	-68.9254	52.3066	-71.8978	46.435	-100.46	69.05	1.35	70	tropical lowland forest	6	6. tropical lowland forest	NULL
	Pinopsida	9	Pinales	42	Cupressaceae	24	Metasequoia sp.	144	325	Gymnosperm	3	Maas	2	Peppe et al., 2007	14	14.204	Fox Hills	5	52.9325	-66.8217	53.1207	-68.9254	52.3066	-71.8978	46.435	-100.46	69.05	1.35	70	temperate lowland forest	2	2. temperate lowland forest	NULL
	Pinopsida	9	Pinales	42	Cupressaceae	24	Glyptostrobus sp.	102	231	Gymnosperm	3	Maas	2	Peppe et al., 2007	14	22.4274	Fox Hills	5	52.9325	-66.8217	53.1207	-68.9254	52.3066	-71.8978	46.435	-100.46	69.05	1.35	70	swampy, lagoonal	3	3. swampy, lagoonal	NULL
	Pinopsida	9	Pinales	42	Cupressaceae	24	Sequoia sp.	225	527	Gymnosperm	3	Maas	2	Peppe et al., 2007	14	0.0439754	Fox Hills	5	52.9325	-66.8217	53.1207	-68.9254	52.3066	-71.8978	46.435	-100.46	69.05	1.35	70	temperate lowland forest	2	2. temperate lowland forest	NULL
	Pinopsida	9	Pinales	42	Cupressaceae	24	Taxodium olrikii	231	536	Gymnosperm	3	Maas	2	Peppe et al., 2007	14	0.219877	Fox Hills	5	52.9325	-66.8217	53.1207	-68.9254	52.3066	-71.8978	46.435	-100.46	69.05	1.35	70	wet, successional	5	5. wet, successional	NULL
	Pinopsida	9	Pinales	42	Cupressaceae	24	Mesocyparis borealis	143	322	Gymnosperm	3	Maas	2	Peppe et al., 2007	14	2.06684	Fox Hills	5	52.9325	-66.8217	53.1207	-68.9254	52.3066	-71.8978	46.435	-100.46	69.05	1.35	70	temperate lowland forest	2	2. temperate lowland forest	NULL
	Pinopsida	9	Pinales	42	Cheirolepidiaceae	21	Cupressinocladus interruptus	64	119	Gymnosperm	3	Maas	2	Peppe et al., 2007	14	0.219877	Fox Hills	5	52.9325	-66.8217	53.1207	-68.9254	52.3066	-71.8978	46.435	-100.46	69.05	1.35	70	temperate lowland forest	2	2. temperate lowland forest	NULL
	Pinopsida	9	Pinales	42	uncertain	101	Elatides longifolia	84	167	Gymnosperm	3	Maas	2	Peppe et al., 2007	14	0.131926	Fox Hills	5	52.9325	-66.8217	53.1207	-68.9254	52.3066	-71.8978	46.435	-100.46	69.05	1.35	70	temperate lowland forest	2	2. temperate lowland forest	NULL
	Magnoliopsida	6	Magnoliales	34	Annonaceae	5	Asimina knowltonia	21	30	Angiosperm	1	Maas	2	Peppe et al., 2007	14	0.175901	Fox Hills	5	52.9325	-66.8217	53.1207	-68.9254	52.3066	-71.8978	46.435	-100.46	69.05	1.35	70	tropical lowland forest	6	6. tropical lowland forest	NULL
	Liliopsida	4	Alismatales	1	Araceae	7	Pistia corrugata	180	384	Angiosperm	1	Maas	2	Peppe et al., 2007	14	2.8584	Fox Hills	5	52.9325	-66.8217	53.1207	-68.9254	52.3066	-71.8978	46.435	-100.46	69.05	1.35	70	estuarine, aquatic	7	7. estuarine, aquatic	NULL
	Liliopsida	4	Zingiberales	62	Zingiberaceae	100	Zingiberopsis magnifolia	253	579	Angiosperm	1	Maas	2	Peppe et al., 2007	14	0.351803	Fox Hills	5	52.9325	-66.8217	53.1207	-68.9254	52.3066	-71.8978	46.435	-100.46	69.05	1.35	70	tropical lowland forest	6	6. tropical lowland forest	NULL
	Liliopsida	4	Poales	45	Cyperaceae	27	Cyperacites sp.	68	124	Angiosperm	1	Maas	2	Peppe et al., 2007	14	3.73791	Fox Hills	5	52.9325	-66.8217	53.1207	-68.9254	52.3066	-71.8978	46.435	-100.46	69.05	1.35	70	wet, successional	5	5. wet, successional	NULL
	Magnoliopsida	6	Magnoliales	34	Magnoliaceae?	56	Liriodendrites bradacii	122	283	Angiosperm	1	Maas	2	Peppe et al., 2007	14	6.20053	Fox Hills	5	52.9325	-66.8217	53.1207	-68.9254	52.3066	-71.8978	46.435	-100.46	69.05	1.35	70	coastal plain	4	4. coastal plain	NULL
	Magnoliopsida	6	Magnoliales	34	Magnoliaceae?	56	Liriodendron laramiense	123	284	Angiosperm	1	Maas	2	Peppe et al., 2007	14	0.131926	Fox Hills	5	52.9325	-66.8217	53.1207	-68.9254	52.3066	-71.8978	46.435	-100.46	69.05	1.35	70	coastal plain	4	4. coastal plain	NULL
	Magnoliopsida	6	Magnoliales	34	Magnoliaceae?	56	Magnoliaceae, unknown (FH4)	128	295	Angiosperm	1	Maas	2	Peppe et al., 2007	14	0.0879507	Fox Hills	5	52.9325	-66.8217	53.1207	-68.9254	52.3066	-71.8978	46.435	-100.46	69.05	1.35	70	tropical lowland forest	6	6. tropical lowland forest	NULL
	Magnoliopsida	6	Magnoliales	34	Annonaceae	5	Asimina knowltonia	21	30	Angiosperm	1	Maas	2	Peppe et al., 2007	14	0.0879507	Fox Hills	5	52.9325	-66.8217	53.1207	-68.9254	52.3066	-71.8978	46.435	-100.46	69.05	1.35	70	tropical lowland forest	6	6. tropical lowland forest	NULL
	Magnoliopsida	6	Laurales	31	Lauraceae	51	Laurophyllum lanceolatum	115	265	Angiosperm	1	Maas	2	Peppe et al., 2007	14	0.219877	Fox Hills	5	52.9325	-66.8217	53.1207	-68.9254	52.3066	-71.8978	46.435	-100.46	69.05	1.35	70	tropical lowland forest	6	6. tropical lowland forest	NULL
	Magnoliopsida	6	Laurales	31	Lauraceae	51	Marmarthia johnsonii	138	312	Angiosperm	1	Maas	2	Peppe et al., 2007	14	0.351803	Fox Hills	5	52.9325	-66.8217	53.1207	-68.9254	52.3066	-71.8978	46.435	-100.46	69.05	1.35	70	tropical lowland forest	6	6. tropical lowland forest	NULL
	Magnoliopsida	6	Rosales	51	Moraceae	61	Artocarpus lessigiana	19	25	Angiosperm	1	Maas	2	Peppe et al., 2007	14	0.263852	Fox Hills	5	52.9325	-66.8217	53.1207	-68.9254	52.3066	-71.8978	46.435	-100.46	69.05	1.35	70	tropical lowland forest	6	6. tropical lowland forest	NULL
	Magnoliopsida	6	Laurales	31	uncertain	101	Laurales, unknown (FH71)	112	247	Angiosperm	1	Maas	2	Peppe et al., 2007	14	0.0439754	Fox Hills	5	52.9325	-66.8217	53.1207	-68.9254	52.3066	-71.8978	46.435	-100.46	69.05	1.35	70	tropical lowland forest	6	6. tropical lowland forest	NULL
	Magnoliopsida	6	Saxifragales	55	Cercidiphyllaceae	20	Cercidiphyllum ellipticum	47	75	Angiosperm	1	Maas	2	Peppe et al., 2007	14	0.219877	Fox Hills	5	52.9325	-66.8217	53.1207	-68.9254	52.3066	-71.8978	46.435	-100.46	69.05	1.35	70	temperate lowland forest	2	2. temperate lowland forest	NULL
	Magnoliopsida	6	Vitales	61	Vitaceae	96	Vitis stantonii	244	567	Angiosperm	1	Maas	2	Peppe et al., 2007	14	5.62885	Fox Hills	5	52.9325	-66.8217	53.1207	-68.9254	52.3066	-71.8978	46.435	-100.46	69.05	1.35	70	temperate lowland forest	2	2. temperate lowland forest	NULL
	Magnoliopsida	6	Proteales	47	Platanaceae	72	Platanites marginata	182	413	Angiosperm	1	Maas	2	Peppe et al., 2007	14	1.49516	Fox Hills	5	52.9325	-66.8217	53.1207	-68.9254	52.3066	-71.8978	46.435	-100.46	69.05	1.35	70	temperate lowland forest	2	2. temperate lowland forest	NULL
	Magnoliopsida	6	Proteales	47	Platanaceae	72	Grewiopsis saportana	103	234	Angiosperm	1	Maas	2	Peppe et al., 2007	14	2.19877	Fox Hills	5	52.9325	-66.8217	53.1207	-68.9254	52.3066	-71.8978	46.435	-100.46	69.05	1.35	70	temperate lowland forest	2	2. temperate lowland forest	NULL
	Magnoliopsida	6	Vitales	61	Vitaceae	96	Vitis stantonii	244	567	Angiosperm	1	Maas	2	Peppe et al., 2007	14	0.747581	Fox Hills	5	52.9325	-66.8217	53.1207	-68.9254	52.3066	-71.8978	46.435	-100.46	69.05	1.35	70	temperate lowland forest	2	2. temperate lowland forest	NULL
	Magnoliopsida	6	Proteales	47	Platanaceae	72	Platanaceae, unknown (FH35)	181	396	Angiosperm	1	Maas	2	Peppe et al., 2007	14	0.131926	Fox Hills	5	52.9325	-66.8217	53.1207	-68.9254	52.3066	-71.8978	46.435	-100.46	69.05	1.35	70	temperate lowland forest	2	2. temperate lowland forest	NULL
	Magnoliopsida	6	Fabales	21	Fabaceae	38	Dalbergites simplex	69	125	Angiosperm	1	Maas	2	Peppe et al., 2007	14	0.659631	Fox Hills	5	52.9325	-66.8217	53.1207	-68.9254	52.3066	-71.8978	46.435	-100.46	69.05	1.35	70	tropical lowland forest	6	6. tropical lowland forest	NULL
	Magnoliopsida	6	Proteales	47	Platanaceae	72	Hamamelidales, unknown (FH20)	104	235	Angiosperm	1	Maas	2	Peppe et al., 2007	14	1.27529	Fox Hills	5	52.9325	-66.8217	53.1207	-68.9254	52.3066	-71.8978	46.435	-100.46	69.05	1.35	70	coastal plain	4	4. coastal plain	NULL
	Magnoliopsida	6	Dilleniales	16	uncertain	101	Dilleniales, unknown (FH27)	76	151	Angiosperm	1	Maas	2	Peppe et al., 2007	14	0.439754	Fox Hills	5	52.9325	-66.8217	53.1207	-68.9254	52.3066	-71.8978	46.435	-100.46	69.05	1.35	70	tropical lowland forest	6	6. tropical lowland forest	NULL
	Magnoliopsida	6	Cornales	11	Cornaceae	23	Cornus sp.	59	106	Angiosperm	1	Maas	2	Peppe et al., 2007	14	0.131926	Fox Hills	5	52.9325	-66.8217	53.1207	-68.9254	52.3066	-71.8978	46.435	-100.46	69.05	1.35	70	temperate lowland forest	2	2. temperate lowland forest	NULL
	Magnoliopsida	6	Rosales	51	Rhamnaceae	81	Rhamnus salicifolius	205	470	Angiosperm	1	Maas	2	Peppe et al., 2007	14	5.7168	Fox Hills	5	52.9325	-66.8217	53.1207	-68.9254	52.3066	-71.8978	46.435	-100.46	69.05	1.35	70	temperate lowland forest	2	2. temperate lowland forest	NULL
	Magnoliopsida	6	Fagales	22	Juglandaceae	50	Juglans arctica	110	242	Angiosperm	1	Maas	2	Peppe et al., 2007	14	1.27529	Fox Hills	5	52.9325	-66.8217	53.1207	-68.9254	52.3066	-71.8978	46.435	-100.46	69.05	1.35	70	temperate lowland forest	2	2. temperate lowland forest	NULL
	Magnoliopsida	6	Proteales	47	Proteaceae	77	Macclintockia electilis	125	288	Angiosperm	1	Maas	2	Peppe et al., 2007	14	0.0439754	Fox Hills	5	52.9325	-66.8217	53.1207	-68.9254	52.3066	-71.8978	46.435	-100.46	69.05	1.35	70	coastal plain	4	4. coastal plain	NULL
	Magnoliopsida	6	Nymphaeales	40	Nymphaeaceae	64	Paranymphaea hastata	165	360	Angiosperm	1	Maas	2	Peppe et al., 2007	14	0.175901	Fox Hills	5	52.9325	-66.8217	53.1207	-68.9254	52.3066	-71.8978	46.435	-100.46	69.05	1.35	70	estuarine, aquatic	7	7. estuarine, aquatic	NULL
	Cycadopsida	2	Bennettitales	5	Cycadeoideaceae	26	Nilssonia gibbsii	154	341	Gymnosperm	3	Maas	2	Rouse, 1967	16	NULL	unknown	14	65.7324	-88.9424	65.7425	-91.3106	64.7366	-93.8387	54.9333	-122.65	NaN	NaN	70	tropical lowland forest	6	6. tropical lowland forest	British Columbia
	Pinopsida	9	Pinales	42	Cupressaceae	24	Glyptostrobus comoxensis	102	228	Gymnosperm	3	Maas	2	Rouse, 1967	16	NULL	unknown	14	65.7324	-88.9424	65.7425	-91.3106	64.7366	-93.8387	54.9333	-122.65	NaN	NaN	70	swampy, lagoonal	3	3. swampy, lagoonal	British Columbia
	Pinopsida	9	Pinales	42	Cupressaceae	24	Metasequoia occidentalis	144	323	Gymnosperm	3	Maas	2	Rouse, 1967	16	NULL	unknown	14	65.7324	-88.9424	65.7425	-91.3106	64.7366	-93.8387	54.9333	-122.65	NaN	NaN	70	temperate lowland forest	2	2. temperate lowland forest	British Columbia
	Pinopsida	9	Pinales	42	Cupressaceae	24	Sequoiites artus	226	528	Gymnosperm	3	Maas	2	Rouse, 1967	16	NULL	unknown	14	65.7324	-88.9424	65.7425	-91.3106	64.7366	-93.8387	54.9333	-122.65	NaN	NaN	70	temperate lowland forest	2	2. temperate lowland forest	British Columbia
	Magnoliopsida	6	Saxifragales	55	Cercidiphyllaceae	20	Cercidiphyllum arcticum	47	74	Angiosperm	1	Maas	2	Rouse, 1967	16	NULL	unknown	14	65.7324	-88.9424	65.7425	-91.3106	64.7366	-93.8387	54.9333	-122.65	NaN	NaN	70	temperate lowland forest	2	2. temperate lowland forest	British Columbia
	Magnoliopsida	6	Rosales	51	Rhamnaceae	81	Zizyphus sp.	257	585	Angiosperm	1	Maas	2	Rouse, 1967	16	NULL	unknown	14	65.7324	-88.9424	65.7425	-91.3106	64.7366	-93.8387	54.9333	-122.65	NaN	NaN	70	tropical lowland forest	6	6. tropical lowland forest	British Columbia
	Magnoliopsida	6	Vitales	61	Vitaceae	96	Vitis stantonii	244	567	Angiosperm	1	Maas	2	Rouse, 1967	16	NULL	unknown	14	65.7324	-88.9424	65.7425	-91.3106	64.7366	-93.8387	54.9333	-122.65	NaN	NaN	70	temperate lowland forest	2	2. temperate lowland forest	British Columbia
	Magnoliopsida	6	Fagales	22	Fagaceae	39	Dryophyllum subfalcatum	81	163	Angiosperm	1	Maas	2	Rouse, 1967	16	NULL	unknown	14	65.7324	-88.9424	65.7425	-91.3106	64.7366	-93.8387	54.9333	-122.65	NaN	NaN	70	temperate lowland forest	2	2. temperate lowland forest	British Columbia
	Magnoliopsida	6	Nymphaeales	40	Nymphaeaceae	64	Castaliites sp. f. C. ordinarius	38	62	Angiosperm	1	Maas	2	Rouse, 1967	16	NULL	unknown	14	65.7324	-88.9424	65.7425	-91.3106	64.7366	-93.8387	54.9333	-122.65	NaN	NaN	70	estuarine, aquatic	7	7. estuarine, aquatic	British Columbia
	Magnoliopsida	6	Proteales	47	Platanaceae	72	Grewiopsis saportana	103	234	Angiosperm	1	Maas	2	Rouse, 1967	16	NULL	unknown	14	65.7324	-88.9424	65.7425	-91.3106	64.7366	-93.8387	54.9333	-122.65	NaN	NaN	70	temperate lowland forest	2	2. temperate lowland forest	British Columbia
	Magnoliopsida	6	Celastrales	8	Celastraceae	18	Celastrinites wardii	41	66	Angiosperm	1	Maas	2	Rouse, 1967	16	NULL	unknown	14	65.7324	-88.9424	65.7425	-91.3106	64.7366	-93.8387	54.9333	-122.65	NaN	NaN	70	tropical lowland forest	6	6. tropical lowland forest	British Columbia

## Sheet: Leaf Class
Order	Order Code
'Bryopsida'	1
'Cycadopsida'	2
'Ginkgoopsida'	3
'Liliopsida'	4
'Lycopodiopsida'	5
'Magnoliopsida'	6
'Magnoliopsida?'	7
'Marchantiopsida'	8
'Pinopsida'	9
'Polypodiopsida'	10
'uncertain'	11

## Sheet: Leaf Order
Order	Order Code
'Alismatales'	1
'Amborellales'	2
'Arecales'	3
'Austrobaileyales'	4
'Bennettitales'	5
'Bryales'	6
'Canellales'	7
'Celastrales'	8
'Chloranthales'	9
'Commelinales'	10
'Cornales'	11
'Cornales (Umbellales)'	12
'Cyatheales'	13
'Cycadales'	14
'Cycadales?'	15
'Dilleniales'	16
'Dipsacales'	17
'Ebenales'	18
'Equisetales'	19
'Ericales'	20
'Fabales'	21
'Fagales'	22
'Filicales'	23
'Garryales'	24
'Gentianales'	25
'Ginkgoales'	26
'Gleicheniales'	27
'Gleicheniales?'	28
'Hepaticae?'	29
'Lamiales'	30
'Laurales'	31
'Laurales?'	32
'Lycopodiales'	33
'Magnoliales'	34
'Magnoliales?'	35
'Malpighiales'	36
'Malvales'	37
'Marchantiales'	38
'Myrtales'	39
'Nymphaeales'	40
'Osmundales'	41
'Pinales'	42
'Pinales?'	43
'Piperales'	44
'Poales'	45
'Polypodiales'	46
'Proteales'	47
'Ranunculales'	48
'Ranunculales?'	49
'Rhamnales'	50
'Rosales'	51
'Rosales?'	52
'Salviniales'	53
'Sapindales'	54
'Saxifragales'	55
'Schizaeales'	56
'Selaginellales'	57
'Theales'	58
'Trochodendrales/Cercidiphyllales'	59
'Violales'	60
'Vitales'	61
'Zingiberales'	62
'uncertain'	63

## Sheet: Leaf Family
Family	Family Code
'Aceraceae'	1
'Adoxaceae'	2
'Amborellaceae'	3
'Anacardiaceae'	4
'Annonaceae'	5
'Apocynaceae'	6
'Araceae'	7
'Araucariaceae'	8
'Arecaceae'	9
'Aristolochiaceae'	10
'Aspleniaceae'	11
'Berberidaceae'	12
'Betulaceae'	13
'Bignoniaceae'	14
'Blechnaceae'	15
'Cannabaceae'	16
'Cannaceae'	17
'Celastraceae'	18
'Cephalotaxaceae'	19
'Cercidiphyllaceae'	20
'Cheirolepidiaceae'	21
'Chloranthaceae'	22
'Cornaceae'	23
'Cupressaceae'	24
'Cyatheaceae'	25
'Cycadeoideaceae'	26
'Cyperaceae'	27
'Dammaritaceae'	28
'Davalliaceae'	29
'Dennstaedtiaceae'	30
'Dilleniaceae'	31
'Dryopteridaceae'	32
'Ebenaceae'	33
'Equisetaceae'	34
'Eriocaulaceae'	35
'Eucommiaceae'	36
'Euphorbiaceae'	37
'Fabaceae'	38
'Fagaceae'	39
'Ficeae'	40
'Flacourtiaceae'	41
'Ginkgoaceae'	42
'Gleicheniaceae'	43
'Gleicheniaceae?'	44
'Grossulariaceae'	45
'Hamamelidaceae'	46
'Hamamelidaceae?'	47
'Hydrocharitaceae'	48
'Hydropteridiaceae'	49
'Juglandaceae'	50
'Lauraceae'	51
'Lauraceae?'	52
'Lycopodiaceae'	53
'Lythraceae'	54
'Magnoliaceae'	55
'Magnoliaceae?'	56
'Malvaceae'	57
'Marchantiaceae'	58
'Marseleaceae'	59
'Menispermaceae'	60
'Moraceae'	61
'Myricaceae'	62
'Nelumbonaceae'	63
'Nymphaeaceae'	64
'Oleaceae'	65
'Onocleaceae'	66
'Osmundaceae'	67
'Papaveraceae'	68
'Phyllocladaceae?'	69
'Pinaceae'	70
'Piperaceae'	71
'Platanaceae'	72
'Poaceae'	73
'Podocarpaceae'	74
'Polypodiaceae'	75
'Pontederiaceae'	76
'Proteaceae'	77
'Pteridaceae'	78
'Racopilaceae'	79
'Ranunculaceae'	80
'Rhamnaceae'	81
'Rosaceae'	82
'Saccolomataceae'	83
'Salicaceae'	84
'Salviniaceae'	85
'Sapindaceae'	86
'Saururaceae'	87
'Schizaeaceae'	88
'Selaginellaceae'	89
'Thelypteridaceae'	90
'Trimeniaceae'	91
'Typhaceae'	92
'Ulmaceae'	93
'Ulmaceae?'	94
'Urticaceae'	95
'Vitaceae'	96
'Williamsoniaceae'	97
'Winteraceae'	98
'Zamiaceae'	99
'Zingiberaceae'	100
'uncertain'	101
Trochodendraceae	102

## Sheet: Leaf Genera
Genus	Genus Code
'Aceraceae'	1
'Aesculus'	2
'Amborellites'	3
'Amesoneuron'	4
'Ampelopsis'	5
'Anceptophyllum'	6
'Androvettia'	7
'Anemia'	8
'Anona'	9
'Apocynophyllum'	10
'Aquilina'	11
'Araliaephyllum'	12
'Araucaria'	13
'Araucariaceae'	14
'Araucarioxylon'	15
'Araucarites'	16
'Aristolochia'	17
'Aristolochites'	18
'Artocarpus'	19
'Ascarinites'	20
'Asimina'	21
'Aspleniaceae'	22
'Asplenites'	23
'Asplenium'	24
'Avernalia'	25
'Belfria'	26
'Berberidaceae'	27
'Betula'	28
'Betulites'	29
'Bisonia'	30
'Brachyphyllum'	31
'Canna'	32
'Cannabaceae'	33
'Carpites'	34
'Carpolithes'	35
'Carya'	36
'Castalia'	37
'Castaliites'	38
'Castanea'	39
'Catalpa'	40
'Celastrinites'	41
'Celastrophyllum'	42
'Celastrus'	43
'Cephalotaxus'	44
'Cercidiphyllaceae'	45
'Cercidiphyllales'	46
'Cercidiphyllum'	47
'Chloranthaceae'	48
'Churchillia'	49
'Cinnamomum'	50
'Cissites'	51
'Cissus'	52
'Cladophlebis'	53
'Cocculus'	54
'Colutea'	55
'Coniferales'	56
'Conites'	57
'Cornophyllum'	58
'Cornus'	59
'Corylus'	60
'Crassidenticulum'	61
'Cunninghamites'	62
'Cupressaceae'	63
'Cupressinocladus'	64
'Cupressinoxylon'	65
'Cyathea'	66
'Cyparissidium'	67
'Cyperacites'	68
'Dalbergites'	69
'Dammara'	70
'Dammarites'	71
'Davallia'	72
'Dennstaedtia'	73
'Diacrophyllum'	74
'Dicotylophyllum'	75
'Dilleniales'	76
'Dilleniidae'	77
'Dillenites'	78
'Diospyros'	79
'Dombeyopsis'	80
'Dryophyllum'	81
'Dryopteris'	82
'Ebenales'	83
'Elatides'	84
'Elatocladus'	85
'Eodicranopteris'	86
'Equisetum'	87
'Eriocaulon'	88
'Erlingdorfia'	89
'Erlingodorfia'	90
'Fagaceae'	91
'Ficus'	92
'Filicales'	93
'Filicites'	94
'Filicopsida'	95
'Flacourtiaceae'	96
'Fokieniopsis'	97
'Geinitzia'	98
'Geonomites'	99
'Ginkgo'	100
'Gleichenites'	101
'Glyptostrobus'	102
'Grewiopsis'	103
'Hamamelidales'	104
'Hamamelididae'	105
'Harmsia'	106
'Hepaticites'	107
'Heteranthera'	108
'Hydropteris'	109
'Juglans'	110
'Lauraceae'	111
'Laurales'	112
'Laurales?'	113
'Laurodaphne'	114
'Laurophyllum'	115
'Laurus'	116
'Leepierceia'	117
'Leguminosites'	118
'Lemna'	119
'Lesterwardia'	120
'Limnobiophyllum'	121
'Liriodendrites'	122
'Liriodendron'	123
'Lycopodium'	124
'Macclintockia'	125
'Magnifolia'	126
'Magnolia'	127
'Magnoliaceae'	128
'Magnoliales'	129
'Magnoliatae'	130
'Magnoliophyllum'	131
'Magnoliopsida'	132
'Malapoenna'	133
'Malvales'	134
'Manihotites'	135
'Marchantia'	136
'Marchantities'	137
'Marmarthia'	138
'Marsilea'	139
'Menispermaceae'	140
'Menispermites'	141
'Menispermum'	142
'Mesocyparis'	143
'Metasequoia'	144
'Minispermites'	145
'Montania'	146
'Moriconia'	147
'Myrica'	148
'Myrtophyllum'	149
'Nageiopsis'	150
'Nelumbago'	151
'Nelumbium'	152
'Nelumbo'	153
'Nilssonia'	154
'Nilssoniocladus'	155
'Nyssidium'	156
'Onoclea'	157
'Osmunda'	158
'Ottelia'	159
'Palaeoaster'	160
'Paliurus'	161
'Palmate Dilleniidae'	162
'Palmoxylon'	163
'Paracredneria'	164
'Paranymphaea'	165
'Parataxodium'	166
'Penosphyllum'	167
'Persea'	168
'Philodendron'	169
'Phoenocites'	170
'Phragmites'	171
'Phyllites'	172
'Pinales'	173
'Pinales?'	174
'Pinnate'	175
'Pinnate Dilleniidae'	176
'Pinus'	177
'Piperales'	178
'Pistacia'	179
'Pistia'	180
'Platanaceae'	181
'Platanites'	182
'Platanophyllum'	183
'Platanus'	184
'Plicatophyllum'	185
'Podocarpus'	186
'Podogonium'	187
'Podozamites'	188
'Populus'	189
'Porosia'	190
'Powellia'	191
'Proteales'	192
'Protophyllocladus'	193
'Protophyllum'	194
'Pterospermites'	195
'Quercophyllum'	196
'Quercus'	197
'Quereuxia'	198
'Ranunculaceae'	199
'Ranunculidae'	200
'Retinovena'	201
'Rhamnaceae'	202
'Rhamnales'	203
'Rhamnites'	204
'Rhamnus'	205
'Rhizopalmoxylon'	206
'Rhus'	207
'Ribes'	208
'Rosaceae'	209
'Rosidae'	210
'Sabalites'	211
'Saccoloma'	212
'Salisburia'	213
'Salix'	214
'Salvinia'	215
'Sapindopsis'	216
'Sapindus'	217
'Sarcandra'	218
'Sassafras'	219
'Saururaceae'	220
'Saxifragales'	221
'Scirpus'	222
'Selaginella'	223
'Semiungula'	224
'Sequoia'	225
'Sequoiites'	226
'Sokophyllum'	227
'Sparganium'	228
'Symphorocarpophyllum'	229
'Taxites'	230
'Taxodium'	231
'Theales'	232
'Thelypteris'	233
'Thuja'	234
'Trapa'	235
'Trimeniaceae'	236
'Trochodendrales'	237
'Trochodendroides'	238
'Typha'	239
'Ulmaceae'	240
'Ulmus'	241
'Urticaceae'	242
'Viburnum'	243
'Vitis'	244
'Weediaphyllum'	245
'Widdringtonia'	246
'Widdringtonites'	247
'Williamsonia'	248
'Woodwardia'	249
'Woodwarthia'	250
'Zamia'	251
'Zamites'	252
'Zingiberopsis'	253
'Ziziphoides'	254
'Ziziphus'	255
'Zizyphoides'	256
'Zizyphus'	257

## Sheet: Leaf Species
Species	Species Code
'Aesculus antiqua'	1
'Amborellites wyomingensis'	2
'Amesoneuron or Sabalites sp.'	3
'Amesoneuron sp.'	4
'Ampelopsis acerifolia'	5
'Anceptophyllum pulcram'	6
'Androvettia catenulata'	7
'Anemia elongata'	8
'Anemia fremonti'	9
'Anemia hesperia'	10
'Anemia sp.'	11
'Anemia subcretacea'	12
'Anona robusta'	13
'Apocynophyllum giganteum'	14
'Aquilina grossidentata'	15
'Araliaephyllum polevoi'	16
'Araucaria longifolia'	17
'Araucaria sp.'	18
'Araucariaceae, unknown 1 (HC83)'	19
'Araucarioxylon sp.'	20
'Araucarites longifolia'	21
'Araucarites sp.'	22
'Aristolochia coloradensis'	23
'Aristolochites brittoni'	24
'Artocarpus lessigiana'	25
'Artocarpus sp.'	26
'Ascarinites communis'	27
'Ascarinites eximia'	28
'Asimina eocenica'	29
'Asimina knowltonia'	30
'Aspleniaceae, unknown'	31
'Asplenites tenellum'	32
'Asplenium coloradense'	33
'Asplenium neomexicana'	34
'Asplenium sp.'	35
'Asplenium tenellum'	36
'Asplenium wyomingensis'	37
'Avernalia solida'	38
'Belfria microphylla'	39
'Berberidaceae, unknown 1 (HC188)'	40
'Betula perantigua'	41
'Betulites hatcheri'	42
'Bisonia niemii'	43
'Brachyphyllum crassum'	44
'Brachyphyllum macrocarpum'	45
'Canna magnifolia'	46
'Cannabaceae, unknown 1 (HC81)'	47
'Cannabaceae, unknown 2'	48
'Carpites alatus'	49
'Carpites baueri'	50
'Carpites judithae'	51
'Carpites lancensis'	52
'Carpites pruni'	53
'Carpites sp.'	54
'Carpites triangulosus'	55
'Carpites ulmiformes'	56
'Carpites ulmiformis'	57
'Carpolithes sp.'	58
'Carya antiquorum'	59
'Castalia duttoniana'	60
'Castalia stantonii'	61
'Castaliites sp. f. C. ordinarius'	62
'Castanea sp'	63
'Catalpa crassifolia'	64
'Celastrinites populifolius'	65
'Celastrinites wardii'	66
'Celastrophyllum gyminaefolium'	67
'Celastrus sp.'	68
'Celastrus taurenensis'	69
'Celastrus taurinensis'	70
'Cephalotaxus coloradensis'	71
'Cercidiphyllaceae, unknown (HC355)'	72
'Cercidiphyllales, unknown (HC229)'	73
'Cercidiphyllum arcticum'	74
'Cercidiphyllum ellipticum'	75
'Cercidiphyllum genetrix'	76
'Cercidiphyllum sp.'	77
'Cercidiphyllum sp. (HC124)'	78
'Chloranthaceae, unknown 1 (HC88)'	79
'Churchillia montana'	80
'Churchillia sp.'	81
'Cinnamomum affine'	82
'Cinnamomum hesperium'	83
'Cinnamomum lineafolia'	84
'Cinnamomum sezannense'	85
'Cinnamomum sp.'	86
'Cinnamomum stantonii'	87
'Cissites acerifolia'	88
'Cissites insignis'	89
'Cissites lobata'	90
'Cissites puilasokensis'	91
'Cissites puilosokensis'	92
'Cissus marginata'	93
'Cladophlebis sp.'	94
'Cocculus flabella'	95
'Colutea speciosa'	96
'Coniferales, unknown (HC240)'	97
'Coniferales, unknown (HC313)'	98
'Conites sp.'	99
'Cornophyllum newberryi'	100
'Cornophyllum wardii'	101
'Cornus denverensis'	102
'Cornus impressa'	103
'Cornus praeimpress'	104
'Cornus rhamnifolia'	105
'Cornus sp.'	106
'Cornus studeri'	107
'Corylus mcquarrii'	108
'Corylus rostrata'	109
'Crassidenticulum aquilae'	110
'Cunninghamites elegans'	111
'Cunninghamites pulchellus'	112
'Cunninghamites recurvatus'	113
'Cunninghamites sp.'	114
'Cupressaceae(Taxodiaceae), unknown'	115
'Cupressaceae, unknown (HC219)'	116
'Cupressaceae, unknown (HC220)'	117
'Cupressaceae, unknown (HC339)'	118
'Cupressinocladus interruptus'	119
'Cupressinoxylon sp.'	120
'Cyathea pinnata'	121
'Cyparissidium douglassi'	122
'Cyperacites'	123
'Cyperacites sp.'	124
'Dalbergites simplex'	125
'Dammara acicularis'	126
'Dammara sp.'	127
'Dammarites sp.'	128
'Davallia tenuifolia'	129
'Dennstaedtia tenella'	130
'Diacrophyllum visibilis'	131
'Dicot 1 Theales'	132
'Dicot 11 Trochodendrales'	133
'Dicot 12 Laurales'	134
'Dicot 15 Laurales'	135
'Dicot 16 Piperales'	136
'Dicot 19 Platanaceae'	137
'Dicot 27 Magnoliatae'	138
'Dicot 28 Diacrophyllum'	139
'Dicot 29 Diacrophyllum'	140
'Dicot 3 Trimeniaceae'	141
'Dicot 30 Aceraceae'	142
'Dicot 4 Rhamnales'	143
'Dicot 40 Diacrophyllum'	144
'Dicot 43 Ebenales'	145
'Dicot 5 Diacrophyllum'	146
'Dicot 50 Hamamelididae'	147
'Dicot 53 Hamamelididae'	148
'Dicot 6 Platanaceae'	149
'Dicotylophyllum anomalum'	150
'Dilleniales, unknown (FH27)'	151
'Dilleniidae, unknown (HC354)'	152
'Dillenites cleburni'	153
'Diospyros brachysepala'	154
'Diospyros judithae'	155
'Dombeyopsis trivialis'	156
'Dryophyllum campanianum'	157
'Dryophyllum crenatum'	158
'Dryophyllum falcatum'	159
'Dryophyllum giganteum'	160
'Dryophyllum polymorphum'	161
'Dryophyllum sp.'	162
'Dryophyllum subfalcatum'	163
'Dryophyllum tenneseensis'	164
'Dryopteris carbonensis'	165
'Dryopteris sp.'	166
'Elatides longifolia'	167
'Elatocladus albertaensis'	168
'Eodicranopteris campanianum'	169
'Equisetum sp.'	170
'Eriocaulon porosum'	171
'Erlingdorfia montana'	172
'Fagaceae, unknown 1 (HC100)'	173
'Ficus artocarpoides'	174
'Ficus asarifolia'	175
'Ficus baueri'	176
'Ficus ceratops'	177
'Ficus crossii'	178
'Ficus curta'	179
'Ficus dalmatica'	180
'Ficus hesperia '	181
'Ficus impressa'	182
'Ficus incompleta'	183
'Ficus irregularis'	184
'Ficus latifolia'	185
'Ficus laurophylla'	186
'Ficus leei'	187
'Ficus montana'	188
'Ficus multinervis'	189
'Ficus planicostata'	190
'Ficus populoides'	191
'Ficus praelatifolia'	192
'Ficus praetrinervis'	193
'Ficus problematica'	194
'Ficus rhamnoides'	195
'Ficus schimperi'	196
'Ficus sp.'	197
'Ficus speciosissima'	198
'Ficus speciossima'	199
'Ficus squarrosa'	200
'Ficus starkvillensis'	201
'Ficus tillaefolia'	202
'Ficus trinervis'	203
'Ficus wardii'	204
'Filicales sp.'	205
'Filicales, unknown'	206
'Filicales, unknown 1 (HC8)'	207
'Filicales, unknown 2 (HC78)'	208
'Filicales, unknown 3 (HC115)'	209
'Filicales, unknown 4 (HC190)'	210
'Filicites knowltonii'	211
'Filicites sp.'	212
'Filicites supercretacea'	213
'Filicopsida sp.'	214
'Filicopsida sp. 6'	215
'Filicopsida, unknown'	216
'Flacourtiaceae, unknown 1 (HC144)'	217
'Fokieniopsis catenulata'	218
'Geinitzia biformis'	219
'Geinitzia formosa'	220
'Geinitzia longifolia'	221
'Geonomites imperialis'	222
'Ginkgo adiantoides'	223
'Ginkgo laramiensis'	224
'Ginkgo sp.'	225
'Gleichenites sepulta'	226
'Gleichenites sp.'	227
'Glyptostrobus comoxensis'	228
'Glyptostrobus europaeus'	229
'Glyptostrobus europeus'	230
'Glyptostrobus sp.'	231
'Grewiopsis cleburni'	232
'Grewiopsis mclearni'	233
'Grewiopsis saportana'	234
'Hamamelidales, unknown (FH20)'	235
'Hamamelidales, unknown spp.'	236
'Harmsia hydrocotyloidea'	237
'Hepaticites quadrangularis'	238
'Heteranthera cretacea'	239
'Hydropteris pinnata'	240
'Juglans Schimperi'	241
'Juglans arctica'	242
'Juglans rhamnoides'	243
'Juglans rugosa'	244
'Juglans sp.'	245
'Lauraceae, unknown spp.'	246
'Laurales, unknown (FH71)'	247
'Laurales, unknown (HC122)'	248
'Laurales, unknown (HC265)'	249
'Laurales, unknown (HC292)'	250
'Laurales, unknown 1 (HC30)'	251
'Laurales, unknown 2 (HC84)'	252
'Laurales, unknown 3 (HC87)'	253
'Laurales, unknown 4 (HC 122)'	254
'Laurales, unknown 5 (HC162)'	255
'Laurales, unknown 6 (HC163)'	256
'Laurales, unknown 7 (HC168)'	257
'Laurales, unknown 8 (HC199)'	258
'Laurales, unknown spp.'	259
'Laurales?, unknown 1 (HC32)'	260
'Laurales?, unknown 2 (HC192)'	261
'Laurodaphne lobata'	262
'Laurophyllum cf. L. lanceolatum'	263
'Laurophyllum coloradensis'	264
'Laurophyllum lanceolatum'	265
'Laurophyllum meeki'	266
'Laurophyllum salcifolium'	267
'Laurophyllum salicifolium'	268
'Laurophyllum saliciofolium'	269
'Laurophyllum sp.'	270
'Laurophyllum wardiana'	271
'Laurophyllum wardianum'	272
'Laurus baueri'	273
'Laurus coloradensis'	274
'Laurus praestans'	275
'Laurus primigenia'	276
'Leepierceia preartocarpoides'	277
'Leguminosites neomexicana'	278
'Leguminosites sp.'	279
'Lemna scutata'	280
'Lesterwardia palustris'	281
'Limnobiophyllum scutatum'	282
'Liriodendrites bradacii'	283
'Liriodendron laramiense'	284
'Liriodendron sp.'	285
'Liriodendron sp. (HC212)'	286
'Lycopodium lesquereuxiana'	287
'Macclintockia electilis'	288
'Magnifolia berryi'	289
'Magnolia coalvillensis'	290
'Magnolia cordifolia'	291
'Magnolia pulchra'	292
'Magnolia sp.'	293
'Magnolia tenuinervis'	294
'Magnoliaceae, unknown (FH4)'	295
'Magnoliaceae, unknown 1 (HC26)'	296
'Magnoliaceae, unknown 2 (HC43)'	297
'Magnoliaceae, unknown 3 (HC66)'	298
'Magnoliaceae, unknown 4 (HC113)'	299
'Magnoliaceae, unknown 5 (HC 160)'	300
'Magnoliaceae, unknown 6 (HC181)'	301
'Magnoliaceae, unknown 7 (HC195)'	302
'Magnoliales, unknown'	303
'Magnoliophyllum cordatum'	304
'Magnoliopsida, unknown spp.'	305
'Malapoenna macrophylloides'	306
'Malapoenna sp.'	307
'Malvales, unknown 1 (HC7)'	308
'Manihotites georgiana'	309
'Marchantia pealii'	310
'Marchantities palmeri'	311
'Marmarthia johnsonii'	312
'Marmarthia pearsonii'	313
'Marmarthia trivialis'	314
'Marsilea attenuata'	315
'Menispermaceae, unknown'	316
'Menispermites belli'	317
'Menispermites knightii'	318
'Menispermites septentrionales'	319
'Menispermites sp.'	320
'Menispermum dauricumoides'	321
'Mesocyparis borealis'	322
'Metasequoia occidentalis'	323
'Metasequoia occidentallis'	324
'Metasequoia sp.'	325
'Minispermites medici'	326
'Montania glandulosa'	327
'Moriconia cyclotoxon'	328
'Moriconia sp.'	329
'Myrica sp.'	330
'Myrica torreyi'	331
'Myrtophyllum neomexicanum'	332
'Myrtophyllum torreyi'	333
'Nageiopsis sp.'	334
'Nelumbago peltata'	335
'Nelumbium montanum'	336
'Nelumbo'	337
'Nelumbo crossii'	338
'Nelumbo intermedia'	339
'Nelumbo sp.'	340
'Nilssonia gibbsii'	341
'Nilssonia yukonensis'	342
'Nilssoniocladus comtula'	343
'Nilssoniocladus yukonensis'	344
'Nyssidium arcticum'	345
'Onoclea hebridica'	346
'Onoclea hesperia'	347
'Onoclea neomexicana'	348
'Onoclea sensibilis'	349
'Osmunda hollicki'	350
'Osmunda montanensis'	351
'Osmunda sp. cf. O. affinis'	352
'Ottelia americana'	353
'Palaeoaster iniquerienda'	354
'Palaeoaster inquirenda'	355
'Paliurus colombi'	356
'Palmate Dilleniidae, unknown 1 (HC72)'	357
'Palmoxylon spp.'	358
'Paracredneria cretaceae'	359
'Paranymphaea hastata'	360
'Parataxodium sp.'	361
'Penosphyllum cordatum'	362
'Persea hayana'	363
'Philodendron'	364
'Phoenocites sp.'	365
'Phragmites Sp.'	366
'Phragmites sp.'	367
'Phyllites Venosus'	368
'Phyllites caparinoides'	369
'Phyllites celhanensis'	370
'Phyllites cockerelli'	371
'Phyllites denticulatus'	372
'Phyllites intricata'	373
'Phyllites neomexicanus'	374
'Phyllites petiolatus'	375
'Phyllites sp.'	376
'Phyllites triloba'	377
'Pinales, unknown'	378
'Pinales?, unknown'	379
'Pinnate Dilleniidae, unknown 1 (HC127)'	380
'Pinnate Dilleniidae, unknown 2 (HC156)'	381
'Pinus quenstedti'	382
'Pistacia eriensis'	383
'Pistia corrugata'	384
'Platanaceae'	385
'Platanaceae sp. 10'	386
'Platanaceae sp. 11'	387
'Platanaceae sp. 2'	388
'Platanaceae sp. 3'	389
'Platanaceae sp. 5'	390
'Platanaceae sp. 6'	391
'Platanaceae sp. 7'	392
'Platanaceae sp. 8'	393
'Platanaceae sp. 9'	394
'Platanaceae, unknown'	395
'Platanaceae, unknown (FH35)'	396
'Platanaceae, unknown (HC209)'	397
'Platanaceae, unknown 1 (HC6)'	398
'Platanaceae, unknown 10 (HC140)'	399
'Platanaceae, unknown 11 (HC149)'	400
'Platanaceae, unknown 12 (HC151)'	401
'Platanaceae, unknown 13 (HC152)'	402
'Platanaceae, unknown 14 (HC197)'	403
'Platanaceae, unknown 15 (HC198)'	404
'Platanaceae, unknown 2 (HC39)'	405
'Platanaceae, unknown 3 (HC41)'	406
'Platanaceae, unknown 4 (HC46)'	407
'Platanaceae, unknown 5 (HC52)'	408
'Platanaceae, unknown 6 (HC98)'	409
'Platanaceae, unknown 7 (HC99)'	410
'Platanaceae, unknown 8 (HC116)'	411
'Platanaceae, unknown 9 (HC133)'	412
'Platanites marginata'	413
'Platanophyllum montanum'	414
'Platanophyllum sp.'	415
'Platanus alata'	416
'Platanus haydenii'	417
'Platanus nobilis'	418
'Platanus primaeva'	419
'Platanus raynoldsii'	420
'Platanus sp.'	421
'Plicatophyllum imperialis'	422
'Podocarpus stantonii'	423
'Podogonium americanum'	424
'Podozamites sp.'	425
'Populus Acerifolia'	426
'Populus Richardsonii'	427
'Populus acerifolia'	428
'Populus amplus'	429
'Populus arctica'	430
'Populus cretacea'	431
'Populus genetrix'	432
'Populus melanarioides'	433
'Populus mutabilis ovalis'	434
'Populus nebracensis'	435
'Populus nebrascensis'	436
'Populus obovata'	437
'Populus sp.'	438
'Populus wardii'	439
'Porosia verrucosa'	440
'Powellia oblongata'	441
'Proteales, unknown 1 (HC22)'	442
'Proteales, unknown 2 (HC139)'	443
'Protophyllocladus polymorphus'	444
'Protophyllocladus sp.'	445
'Protophyllocladus subintegrifolius'	446
'Protophyllum sp.'	447
'Pterospermites sp.'	448
'Pterospermites undulatus'	449
'Pterospermites wardii'	450
'Quercophyllum sp.'	451
'Quercus baueri'	452
'Quercus dentonoides'	453
'Quercus lequereuxiana'	454
'Quercus lesquereuziana'	455
'Quercus montana'	456
'Quercus sp'	457
'Quercus stantonii'	458
'Quercus viburnifolia'	459
'Quereuxia angulata'	460
'Ranunculaceae, unknown (HC226)'	461
'Ranunculidae, unknown (HC227)'	462
'Retinovena fluvialis'	463
'Rhamnaceae, unknown (HC261)'	464
'Rhamnites eminens'	465
'Rhamnus cleburni'	466
'Rhamnus cleburnii'	467
'Rhamnus goldianus'	468
'Rhamnus minutus'	469
'Rhamnus salicifolius'	470
'Rhamnus williardi'	471
'Rhizopalmoxylon sp.'	472
'Rhus membranacea'	473
'Ribes neomexicana'	474
'Rosaceae, unknown 1 (HC80)'	475
'Rosidae, unknown 1 (HC20)'	476
'Rosidae, unknown 10 (HC232)'	477
'Rosidae, unknown 11 (HC233)'	478
'Rosidae, unknown 12 (HC234)'	479
'Rosidae, unknown 2 (HC47)'	480
'Rosidae, unknown 3 (HC90)'	481
'Rosidae, unknown 4 (HC 132)'	482
'Rosidae, unknown 4 (HC132)'	483
'Rosidae, unknown 5 (HC 142)'	484
'Rosidae, unknown 5 (HC138)'	485
'Rosidae, unknown 6 (HC142)'	486
'Rosidae, unknown 6 (HC194)'	487
'Rosidae, unknown 8 (HC211)'	488
'Rosidae, unknown 9 (HC224)'	489
'Sabalites grayanus'	490
'Sabalites imperialis'	491
'Sabalites montana'	492
'Sabalites sp.'	493
'Saccoloma gardneri'	494
'Salisburia sp.'	495
'Salix angusta'	496
'Salix baueri'	497
'Salix lancensis'	498
'Salix laramiana'	499
'Salix proteaefolia'	500
'Salix raeana'	501
'Salix sp.'	502
'Salix stantonii'	503
'Salvinia sp.'	504
'Sapindopsis powelliana'	505
'Sapindus affinus'	506
'Sapindus inexpectans'	507
'Sarcandra sp.'	508
'Sassafras burpeanum'	509
'Sassafras selwynii'	510
'Saururaceae, unknown (HC182)'	511
'Saururaceae, unknown (HC183)'	512
'Saururaceae, unknown 1 (HC184)'	513
'Saxifragales, unknown'	514
'Scirpus sp.'	515
'Selaginella falcata'	516
'Selaginella laciniata'	517
'Semiungula assymetrica'	518
'Sequoia brevifolia'	519
'Sequoia cuneata'	520
'Sequoia dakotensis'	521
'Sequoia heterophylla'	522
'Sequoia magnifolia'	523
'Sequoia nordenskioldii'	524
'Sequoia obovata'	525
'Sequoia reichenbachi'	526
'Sequoia sp.'	527
'Sequoiites artus'	528
'Sokophyllum dentatum'	529
'Sparganium sp.'	530
'Symphorocarpophyllum '	531
'Symphorocarpophyllum Albertum'	532
'Symphorocarpophyllum Linnaeiforme'	533
'Taxites olrikii'	534
'Taxodium occidentale'	535
'Taxodium olrikii'	536
'Thelypteris goldianum'	537
'Thuja cretacea'	538
'Thuja interrupta'	539
'Trapa borealis'	540
'Trapa cuneata'	541
'Trapa microphylla'	542
'Trochodendrales, unknown'	543
'Trochodendrales, unknown (FU6)'	544
'Trochodendrales, unknown 1 (HC73)'	545
'Trochodendroides nebrascensis'	546
'Trochodendroides sp.'	547
'Typha sp.'	548
'Ulmaceae, unknown 1 (HC36)'	549
'Ulmus Praecursor'	550
'Urticaceae, unknown (HC228)'	551
'Urticaceae, unknown 1 (HC93)'	552
'Urticaceae, unknown 2 (18)'	553
'Viburnum anomalum'	554
'Viburnum antiguum'	555
'Viburnum antiquum'	556
'Viburnum asperum'	557
'Viburnum calgarianum'	558
'Viburnum lanceollatum'	559
'Viburnum marginatum'	560
'Viburnum montanum'	561
'Viburnum oxycoccoides'	562
'Viburnum problematicum'	563
'Viburnum vulpinum'	564
'Viburnum whymperi'	565
'Vitis lobata'	566
'Vitis stantonii'	567
'Weediaphyllum parkensis'	568
'Widdringtonia complanata'	569
'Widdringtonites reichii'	570
'Williamsonia sp.'	571
'Woodwardia crenata'	572
'Woodwardia minor'	573
'Woodwardia sp.'	574
'Woodwarthia crenata'	575
'Zamia sp.'	576
'Zamites albertensis'	577
'Zingiberopsis attenuata'	578
'Zingiberopsis magnifolia'	579
'Ziziphoides flabella'	580
'Ziziphus fibrillosus'	581
'Zizyphoides sp.'	582
'Zizyphus cretaceus'	583
'Zizyphus fibrillosus'	584
'Zizyphus sp.'	585

## Sheet: Biome Count
Environment	Environment Code
unknown	0
upland forest	1
temperate lowland forest	2
swampy, lagoonal	3
coastal plain	4
wet, successional	5
tropical lowland forest	6
estuarine, aquatic	7
open scrubland	8
